# Supplementary material for: Genetic insights into resting heart rate and its role in cardiovascular disease
Source: Springer Nature journal article supplement (doi:10.1038/s41467-023-39521-2), 2023-08-02
Supplement: MOESM3 [file 41467_2023_39521_MOESM3_ESM.pdf]

# Genetic insights into resting heart rate and its role in cardiovascular disease

## Description of Additional Supplementary Files

- File Name : Supplementary Data 1  
Description : Study characteristics of the cohorts.
- File Name : Supplementary Data 2  
Description : 493 Genome-wide significant RHR SNPs.
- File Name : Supplementary Data 3  
Description : Comparison of previously RHR associated loci and/or genetic variants identified in the studies from Guo *et al.*, Eppinga *et al.*, and Den hoed *et al.*, with the genetic variants associated with RHR in the current study.
- File Name : Supplementary Data 4  
Description : Chow-test for all genome-wide significant RHR SNPs to assess differences of effect estimates between participants taking RHR-altering medication or with a history of any cardiovascular disease versus those who did not.
- File Name : Supplementary Data 5  
Description : Genetic correlation between RHR and previously performed GWAS's.
- File Name : Supplementary Data 6  
Description : List of RHR variants associated with previously discovered variants.
- File Name : Supplementary Data 7  
Description : List of coding variants.
- File Name : Supplementary Data 8  
Description : List of functional eQTL genes.
- File Name : Supplementary Data 9  
Description : List of DEPICT genes.
- File Name : Supplementary Data 10  
Description : List of gene annotations for all identified genes.
- File Name : Supplementary Data 11  
Description : Results of gene set enrichment analyses by DEPICT.
- File Name : Supplementary Data 12  
Description : Results of tissue enrichment analysis by DEPICT.
- File Name : Supplementary Data 13  
Description : Effect of RHR SNPs on the ECG.

File Name : Supplementary Data 14  
Description : Mean scaled expression per gene and tissue from the Single-nucleus RNA sequencing data obtained from the healthy human heart.

File Name : Supplementary Data 15  
Description : Definitions of mortality and cardiovascular disease phenotypes in the UK Biobank.

File Name : Supplementary Data 16  
Description : Definitions of cardiovascular disease phenotypes in the CARDIoGRAMplusC4D, AFGen and MEGASTROKE consortia.

File Name : Supplementary Data 17  
Description : Results of the two-sample Mendelian randomization analyses of RHR on mortality within the UK Biobank.

File Name : Supplementary Data 18  
Description : Additional sensitivity analyses of the two-sample Mendelian randomization analyses of RHR on mortality within the UK Biobank.

File Name : Supplementary Data 19  
Description : Single SNP exposure, outcome and exposure-outcome associations between RHR and mortality.

File Name : Supplementary Data 20  
Description : Association between genetic risk scores of RHR and all-cause mortality across different sets of SNPs, effect sizes, *P* value thresholds, populations and follow-up lengths.

File Name : Supplementary Data 21  
Description : Results of the non-linear Mendelian randomization estimates between genetically predicted RHR and all-cause mortality and cardiovascular diseases in the UK Biobank.

File Name : Supplementary Data 22  
Description : Localized average causal effects on all-cause mortality and cardiovascular diseases in the UK Biobank for 30 quantiles of RHR.

File Name : Supplementary Data 23  
Description : Results of the Mendelian randomization between RHR and cardiovascular diseases.

File Name : Supplementary Data 24  
Description : Additional sensitivity analyses of the two-sample Mendelian randomization analyses of RHR and cardiovascular diseases.

File Name : Supplementary Data 25  
Description : Single SNP exposure, outcome and exposure-outcome associations between RHR (effect sizes IC-RHR) and cardiovascular disease (UK Biobank).

File Name : Supplementary Data 26  
Description : Single SNP exposure, outcome and exposure-outcome associations between RHR (effect sizes UK Biobank) and cardiovascular diseases (CARDIoGRAMplusC4D, AFGen and MEGASTROKE consortia).

File Name : Supplementary Data 27  
Description : Results of the two-sample multivariable Mendelian randomization analyses between resting heart rate, atrial fibrillation, blood pressure traits and stroke.

File Name : Supplementary Data 29  
Description : Sensitivity analyses in the two-sample multivariable MR between resting heart rate, atrial fibrillation, blood pressure traits and stroke.

File Name : Supplementary Data 29  
Description : Results of the Mendelian randomization between RHR and blood pressure phenotypes within the ICBP consortium.

File Name : Supplementary Data 30  
Description : Additional sensitivity analyses of the Two-sample Mendelian randomization analyses of RHR and blood pressure phenotypes within the ICBP consortium.

File Name : Supplementary Data 31  
Description : List of Wald estimates with significant ( $P < 1.01 \times 10^{-4}$ ) associations with the cardiovascular outcomes.
