# Supplementary material for: Genetic insights into resting heart rate and its role in cardiovascular disease
Source: Nat Commun. 2023 Aug 2;14:4646. doi: 10.1038/s41467-023-39521-2 (PMC10397318; doi:10.1038/s41467-023-39521-2)
Supplement: Supplementary file 4 — Supplementary Data 1-31 [file 41467_2023_39521_MOESM4_ESM.xlsx]

## Sheet: SD1
Supplementary Data 1: Cohort information.
O	COHORT NAME	HBCS	ALSPAC	NESDA	DESIR	ERF	PIVUS	ULSAM	PREVEND	Lifelines	FHS	PROSPER	NBS	HYPERGENES (cases and controls)	ARIC Whites	ARIC Blacks	DGI cases	DGI controls	MICROS	EPIC-Norfolk	SardiNIA	FamHS	Fenland	INGI-FVG	INGI-Carlantino	LURIC cases	LURIC controls	GENOA EA	GENOA AA	AGES	Rotterdam Study I	Rotterdam Study II	Rotterdam Study III	KORA S4	KORA F3	CHS EA	CHS AA	ORCADES	BioMe-AA	BioMe-EA	BioMe-HA	NEO	TRAILS Pop	TRAILS CC	Heinz Nixdorf Recall Study-OmniQuad	Heinz Nixdorf Recall Study-OmniExpress	Heinz Nixdorf Recall Study-HumanCoreExomeA	Heinz Nixdorf Recall Study-HumanCoreExomeB	TWINS
STUDY INFORMATION	Study name full name (if applicable)	Helsinki Birth Cohort Study (HBCS)	Avon Longitudinal Study of Parents and Children	Netherlands Study of Depression and Anxiety	Epidemiologic data on the syndrome of insulino resistance	Erasmus Rucphen Family Study	Prospective Investigation of the Vasculature in Uppsala Seniors	Uppsala Longitudinal Study of Adult Men	Prevention of REnal and Vascular ENd-stage disease	Lifelines cohort study	Framingham Heart Study	PROspective Study of Pravastatin in the Elderly at Risk for vascular disease	Nijmegen Biomedical Study	European Network for Genetic-Epidemiological Studies: building a method to dissect complex genetic traits, using essential hypertension as a disease model	Atherosclerosis Risk in Communities	Atherosclerosis Risk in Communities	Diabetes Genetics Initiative	Diabetes Genetics Initiative	Microisolates in South Tyrol study	European Prospective Investigation in Cancer and Nutrition	SardiNIA study on aging	Family Heart Study	Fenland Study	Italian Network on Genetic Isolates-Friuli Venezia Giulia	Italian Network on Genetic Isolates-Carlantino	Ludwigshafen Risk and Cardiovascular Health Study - Cases	Ludwigshafen Risk and Cardiovascular Health Study - Controls	Genetic Epidemiology Network of Arteriopathy	Genetic Epidemiology Network of Arteriopathy	Age, Gene/Environment Susceptibility Reykjavik				Kooperative Gesundheitsforschung in der Region Augsburg	Kooperative Gesundheitsforschung in der Region Augsburg	Cardiovascular Health Study	Cardiovascular Health Study	Orkney Complex Disease Study	BioMe	BioMe	BioMe	The Netherlands Epidemiology of Obesity Study	TRacking Adolescents' Individual Lives Survey - Population cohort	TRacking Adolescents' Individual Lives Survey - Clinical cohort	Heinz Nixdorf Recall Study-OmniQuad	Heinz Nixdorf Recall Study-OmniExpress	Heinz Nixdorf Recall Study-HumanCoreExomeA	Heinz Nixdorf Recall Study-HumanCoreExomeB	Groningen Twins Registry
	Contact (for queries)	Jari Lahti (jari.lahti@helsinki.fi); Johan Eriksson (johan.eriksson@helsinki.fi)	vt6347@bristol.ac.uk (Vanessa) ; alspac-exec@bristol.ac.uk	y.milaneschi@ggzingeest.nl; B.Penninx@vumc.nl	mickael.canouil@cnrs.fr p.froguel@imperial.ac.uk	aaron.isaacs@gmail.com	lars.lind@medsci.uu.se	johan.sundstrom@medsci.uu.se	n.verweij@umcg.nl	n.verweij@umcg.nl	hwangs2@nhlbi.nih.gov	s.trompet@lumc.nl	tessel.galesloot@radboudumc.nl	sara.lupoli@unimi.it ; federica.rizzi@unimi.it	arking@jhmi.edu	arking@jhmi.edu	claes.ladenvall@scilifelab.uu.se	claes.ladenvall@scilifelab.uu.se	luisa.foco@eurac.edu	jinghua.zhao@mrc-epid.cam.ac.uk	pistis.giorgio@gmail.com	mfeitosa@wustl.edu, lwang@wustl.edu	jianan.luan@mrc-epid.cam.ac.uk	mariapina.concas@burlo.trieste.it	mariapina.concas@burlo.trieste.it	marcus.kleber@medma.uni-heidelberg.de	marcus.kleber@medma.uni-heidelberg.de	lfbielak@umich.edu	lfbielak@umich.edu	albert@hjarta.is	m.e.vandenberg@erasmusmc.nl	m.e.vandenberg@erasmusmc.nl	m.e.vandenberg@erasmusmc.nl	martina_mueller@ibe.med.uni-muenchen.de	martina_mueller@ibe.med.uni-muenchen.de	jeco@uw.edu	jeco@uw.edu	jim.wilson@ed.ac.uk	Loos, Ruth <ruth.loos@mssm.edu> Schurmann, Claudia <cl8udi8.cs@gmail.com>	Loos, Ruth <ruth.loos@mssm.edu> Schurmann, Claudia <cl8udi8.cs@gmail.com>	Loos, Ruth <ruth.loos@mssm.edu> Schurmann, Claudia <cl8udi8.cs@gmail.com>	r.noordam@lumc.nl, d.o.mook@lumc.nl	A.J. Oldehinkel (a.j.oldehinkel@umcg.nl)	A.J. Oldehinkel (a.j.oldehinkel@umcg.nl)	sonali.pechlivanis@uk-essen.de	sonali.pechlivanis@uk-essen.de	sonali.pechlivansi@uk-essen.de	sonali.pechlivanis@uk-essen.de	H. Riese (h.riese@umcg.nl)
	Ethnicity	Europe (Finns)	European	European (Dutch)	European whites	European (Dutch)	European whites	European whites	European Whites	European Whites	Caucasian	European whites	Caucasian	Caucasian	Whites	Blacks	Northern European	Northern European	European	European White	European	European White	European White	European Whites	European Whites	European whites	European whites	European American	African American	European Ancestry	European Ancestry	European Ancestry	European Ancestry	European Ancestry	European Ancestry	European Ancestry	African American	European Ancestry	African Ancestry	European Ancestry	Hispanic Ancestry	European	European	European	European	European	European	European	European
	Country	Finland	U.K.	Netherlands	France	Netherlands	Sweden	Sweden	NL	NL	USA	NL/ Ireland/UK	NL	North Europe, continental Italy, and Sardinia	USA	USA	Sweden and Finland	Sweden and Finland	Italy	United Kingdom	Italy	United States	United Kingdom	IT	IT	Germany	Germany	USA	USA	Iceland	The Netherlands	The Netherlands	The Netherlands	Germany	Germany	USA	USA	UK	USA (New York City)	USA (New York City)	USA (New York City)	Netherlands	Netherlands	Netherlands	Germany	Germany	Germany	Germany	Netherlands
	Study Design	Birth Cohort	Population-based	Case - control depressive disorder	Population-based	Population-based family	Population-based	Population-based	Population-based	Population-based	community-based family study	Randomized controlled trial/ population based	Population-based survey	Population-based	Population-based	Population-based	Case control of type 2 diabetes	Case control of type 2 diabetes	Cross-sectional, population-based study using extended pedigrees	Case-cohort	Population based	Family Based	Population-based	Population-based	Population-based	Case control	Case control	Cohort of sibships enriched for hypertension	Cohort of sibships enriched for hypertension	Population based	Population based	Population based	Population based	Population based	Population based	Population based	Population based	Population based	EMR-linked clinical care cohort	EMR-linked clinical care cohort	EMR-linked clinical care cohort	Population-based cohort	Adolescents - Population-based cohort	Adolescents - Clinical care cohort	Population based cohort study	Population based cohort study	Population based cohort study	Population based cohort study	Twins
	Total Sample Size of Cohort (N)	2003	28000	2981	5212	3205	998	1146	8592		11380	5804	9350	3615	11478	4266	1525	1617	1287	2417	6921	4135	1500	2272	1682	2583	733	1583	1854	5764	7983	3011	3932	4261	3184	4925	924	2215	3495	2026	4711	6671	1354	341	779	1348	336	1411	250
	Total Samples in primary analysis (N) (geno+pheno)	1615	4850	2146	521	2482	923	1081	3568	13261	7883	5135	549	Dataset analyzed afetr QC: All: 3153: Cases 1530; controls: 1623	8920	2806	1169	1398	1206	2413	6510	3722	1350	1066	441	All: 3058; cases: 2417	All: 3058; controls: 641	1420	1001	3207	3005	1282	1824	3674	2951	3239	796	1780	3028	1434	3856	5661	1197	315	774	1343	336	1397	134
	Seondary analysis (filtered out)	NA	NA	237	missing information for infarctus status, heart rate < 50 bpm	546	Prevalent CVD, use of heart rate altering medication, heart rate <50 or >100 bpm	Prevalent CVD, use of heart rate altering medication, heart rate <50 or >100 bpm	Known heart conditions / heart rate altering medication / HR (< 50 & > 100)	Known heart conditions / heart rate altering medication / HR (< 50 & > 100)	known heart condition/heart rate altering medication	history of heart disease	NA	heart rate altering medication	Known heart conditions / heart rate altering medication / HR (< 50 & > 100)	Known heart conditions / heart rate altering medication / HR (< 50 & > 100)	Known heart conditions / heart rate altering medication / HR (< 50 & > 100)	Known heart conditions / heart rate altering medication / HR (< 50 & > 100)	Known heart conditions / heart rate altering medication / HR (< 50 & > 100)	Calcium channel blockers, beta-blockers, myocardiac infarction	Known heart conditions / heart rate altering medication / HR (< 50 & > 100)	Known heart conditions / heart rate altering medication / HR (< 50 & > 100)	HRREST<50 | HRREST>100, or HR altering mediation	Known heart conditions / heart rate altering medication	Known heart conditions / heart rate altering medication	Known heart conditions / heart rate altering medication / HR (< 50 & > 100)	Known heart conditions / heart rate altering medication / HR (< 50 & > 100)	History of myocardial infarction / heart rate altering medication / HR (< 50 & > 100)	History of myocardial infarction / heart rate altering medication / HR (< 50 & > 100)	1690	2936	2648	2995	727	856	704	284	Known heart conditions / heart rate altering medication / HR (< 50 & > 100)	Known heart conditions / heart rate altering medication / HR (< 50 & > 100)	Known heart conditions / heart rate altering medication / HR (< 50 & > 100)	Known heart conditions / heart rate altering medication / HR (< 50 & > 100)				Known heart conditions / heart rate altering medication / HR (< 50 & > 100)	Known heart conditions / heart rate altering medication / HR (< 50 & > 100)	Known heart conditions / heart rate altering medication / HR (< 50 & > 100)	Known heart conditions / heart rate altering medication / HR (< 50 & > 100)	Known heart conditions / heart rate altering medication / HR (< 50 & > 100)
	Total Samples in secondary analysis (N) (geno+pheno)	NA	NA	1909	505	1936	580	685	3292	11664	7804	2614	NA	Dataset analyzed afetr QC: Cases no therapy: 1278	7933	2408	616	1130	1076	2237	4419	2933	1241	863	388	175	156	863	686	1517	2033	1282	1534	2947	2095	2535	512	1364	2023	967	2570	4421			446	1010	225	813	123
	Study exclusions or disease enrichment	NA	NA	NA	None	NA	NA	NA	population based	3-generations population based	NA	na	NA	NA	NA	NA	NA	NA	NA	NA	NA	NA						Sibships ascertained on hypertension status	Sibships ascertained on hypertension status	None	None	None	None	None	None	None	None	none	None	None	None	Oversampling for BMI > 27 kg/m2	None	Referred to a child psychiatric outpatient clinic any time before the age of 11	na	na	na	na	na
	Exclusions	NA	NA	NA	None	None	none	none	NA	Living outside the 3 Northen provinces of The Netherlands	NA	na	NA	NA	NA	NA	Only one individual per family (randomly selected) from family component of DGI	Only one individual per family (randomly selected) from family component of DGI	NA	NA	NA	NA	Exclusion criteria: prevalent diabetes, pregnant and lactating women, inability to participate including terminal illness, psychotic illness, or inability to walk unaided					secondary hypertension, alcoholism or drug abuse, pregnancy, insulin-dependent diabetes mellitus, or active malignancy	secondary hypertension, alcoholism or drug abuse, pregnancy, insulin-dependent diabetes mellitus, or active malignancy	None	None	None	None	None	None	Prevalent CVD at baseline, no consent for genetic testing	no consent for genetic testing	Pregnancy	extreme phenotypic outliers (>4SD)	extreme phenotypic outliers (>4SD)	extreme phenotypic outliers (>4SD)	extreme phenotypic outliers (>4SD)	extreme phenotypic outliers (>4SD)	extreme phenotypic outliers (>4SD)	na	na	na	na	Monozygotic Twins had one member of each pair excluded for genotyping
	population stratification	PC1-3	top ten principal components	3 Principal components	First two PCs	Linear mixed effects model.	first three PCs	first three PCs	na		principle components	controlled with adjustment for PC1-4	NA	Principle components	PCA 1-4	PCA 1-4	Recruitment center covariates	Recruitment center covariates	NA	NA	NA	Four clinical centers, and princial components		NA	NA	Principle components	Principle components	First 4 prinicipal components	First 10 principal components	None	None	None	None	None	None	Clinic	Clinic	PC and mixed modelling	Race and ethnicity	Race and ethnicity	Race and ethnicity	4 PC	10 PC	10 PC	Principle components	Principle components	Principle components	Principle components	10 PC
	Short description	The Helsinki Birth Cohort Study (HBCS) is composed of 8 760 individuals born between the years 1934-44 in one of the two main maternity hospitals in Helsinki, Finland. Between 2001 and 2003, a randomly selected sample of 928 males and 1075 females participated in a clinical follow-up study with a focus on cardiovascular, metabolic and reproductive health, cognitive function and depressive symptom…	he Avon Longitudinal Study of Parents and Children (ALSPAC) [1,2] is a population based birth cohort initially comprising of 14,541 mothers and their children recruited in the county of Avon, UK between 1991 and 1992. Please note that the study website contains details of all the data that is available through a fully searchable data dictionary" and reference the following webpage:http://www.bris…	The Netherlands Study of Depression and Anxiety (NESDA) is an ongoing cohort study into the long-term course and consequences of depressive and anxiety disorders. Briefly, in 2004-2007 participants aged 18 to 65 years were recruited from the community (19%), general practice (54%) and secondary mental health care (27%), reflecting therefore various settings and developmental stages of psychopatho…	The aim of the cohort DESIR is to study the status of individuals before incidence of diseases (diabetes, hypertension, dislipidemia, obesity, cardio-vascular diseases) caused by insulino-resistance. The initial ascertaiment was performed between 1994 and 1996 in Examination Centers located in Center-West of France (Calvados, Eure-et-Loir, Indre, Indre-et-Loire, Loir-et-Cher, Loiret, Maine-et-Loi…	The Erasmus Rucphen Family study is a family-based cohort embedded in the Genetic Research in Isolated Populations (GRIP) program in the southwest of the Netherlands. The aim of this program is to identify genetic risk factors for the development of complex disorders. In ERF, twenty-two families that had a minimum of five children baptized in the community church between 1850 and 1900 were identi…	All 70-year-old individuals living in Uppsala, Sweden were eligible for PIVUS, and 2,025 randomly selected individuals were invited within 2 months of their 70th birthday from April 2001 to June 2004. Of these, 1,016 participated in the study and provided an overnight fasting blood sample at the baseline examination.	ULSAM began in 1970, when all men 50 years of age born between 1920 and 1924 in Uppsala, Sweden were invited to participate (2,322 participated of 2,841 invited). Participants underwent examinations at ages 60, 70, 77, 82 and 88 years.	The Prevention of REnal and Vascular ENd stage Disease (PREVEND) study is an ongoing prospective study investigating the natural course of increased levels of urinary albumin excretion and its relation to renal and cardiovascular disease. Inhabitants 28 to 75 years of age (n=85,421) in the city of Groningen, The Netherlands, were asked to complete a short questionnaire, 47% responded, and individ…	LifeLines is a multi-disciplinary prospective population-based cohort study examining in a unique three-generation design the health and health-related behaviours of 165,000 persons living in the North East region of The Netherlands. It employs a broad range of investigative procedures in assessing the biomedical, socio-demographic, behavioural, physical and psychological factors which contribute…	Framingham Heart Study is a community-based prospective study designed to investigate the incidence of cardiovascular diseases and factors related to its development. Study population was composed of three cohorts with European ancestry, original (5,209 participants ascertained systematically from two-thirds of the households in the town of Framingham, MA, beginning in 1948), Offspring (5,124 chi…	All data come from the PROspective Study of Pravastatin in the Elderly at Risk (PROSPER). A detailed description of the study has been published elsewhere. PROSPER was a prospective multicenter randomized placebo-controlled trial to assess whether treatment with pravastatin diminishes the risk of major vascular events in elderly. Between December 1997 and May 1999, we screened and enrolled subjec…	The Nijmegen Biomedical Study (NBS; http://www.nijmegenbiomedischestudie.nl) is a population-based survey conducted by the Department for Health Evidence and the Department of Laboratory Medicine of the Radboud University Medical Centre, Nijmegen, The Netherlands. The study has been described before (1). Briefly, in 2002, 22,451 age and sex-stratified randomly selected adult inhabitants of Nijmeg…	HYPERGENES project is focused on the definition of a comprehensive genetic epidemiological model of complex traits like Essential Hypertension (EH) and intermediate phenotypes of hypertension dependent/associated Target Organ Damages (TOD) as well as other endophenotypes as the pharmacogenomic pattern of two drugs widely used in EH. HYPERGENES is a a population-based study conducted by the Depart…	The ARIC study is a population-based prospective cohort study of cardiovascular disease sponsored by the National Heart, Lung, and Blood Institute (NHLBI). ARIC included 15,792 individuals, predominantly European American and African American, aged 45-64 years at baseline (1987-89), chosen by probability sampling from four US communities. Cohort members completed three additional triennial follow…	The ARIC study is a population-based prospective cohort study of cardiovascular disease sponsored by the National Heart, Lung, and Blood Institute (NHLBI). ARIC included 15,792 individuals, predominantly European American and African American, aged 45-64 years at baseline (1987-89), chosen by probability sampling from four US communities. Cohort members completed three additional triennial follow…	The Diabetes Genetics Initiative (DGI) is a collaboration of the Lund University, the Broad Institute of MIT and Harvard and Novartis Institutes for BioMedical Research. DGI consists of a population-based case-control part and a discordant sibship part. In short, 2097 unrelated controls were matched with T2D cases into 935 clusters by gender, age, BMI and place of origin. 196 individuals did not …	The Diabetes Genetics Initiative (DGI) is a collaboration of the Lund University, the Broad Institute of MIT and Harvard and Novartis Institutes for BioMedical Research. DGI consists of a population-based case-control part and a discordant sibship part. In short, 2097 unrelated controls were matched with T2D cases into 935 clusters by gender, age, BMI and place of origin. 196 individuals did not …	The MICROS study is part of the genomic health care program 'GenNova' and was carried out in 2002/03 in three villages of the Val Venosta, South Tyrol (Italy), a German-speaking region bordering with Austria and Switzerland. Owing to geographical, historical and political reasons, the entire region experienced a prolonged period of isolation from surrounding populations. Information on the partic…	The European Prospective Investigation into Cancer and Nutrition (EPIC)-Norfolk study (DOI 10.22025/2019.10.105.00004) is a prospective population-based cohort study which recruited 25,639 men and women aged 40-79 years at baseline between 1993 and 1997 from 35 participating general practices in Norfolk, UK [13]. The cohort studied here is an obesity cohort that includes 2,566 individuals randoml…	The population studied here includes 6,921 individuals, representing >60% of the adult population of 4 villages in the Lanusei Valley in Sardinia, Italy. They are part of the SardiNIA project, a longitudinal study including genetic and phenotypic data of 1,257 multigenerational families with more than 37,000 relative pairs. Details of phenotype assessments for these samples have been published pr…	The Family Heart Study (https://dsgweb.wustl.edu/PROJECTS/MP1.html) began in 1992 with the ascertainment of 1,200 families, half randomly sampled, and half selected because of an excess of coronary heart disease (CHD) or risk factor abnormalities as compared with age- and sex-specific population rates1. The families, with approximately 6,000 individuals, were sampled on the basis of information o…	The Fenland study is a population-based cohort study that uses objective measures of disease exposure, such as accurate methods of body composition and energy expenditure, to study the interactions between genetic and lifestyle factors that cause obesity and diabetes. The volunteers are recruited from general practice lists in and around Cambridgeshire (Cambridge, Ely, and Wisbech) in the United …	The Friuli Venezia Giulia Project was initiated in 2008. All population was invited to partecipate. The Friuli Venezia Giulia cohort included about 2200 samples from 6 isolated villages of Friuli Venezia Giulia, a region of northern Italy. The villages are: Resia, Illegio, Sauris, San Martino del Carso, Erto/Casso, Clauzetto. Our cardiologists enrolled 1,548 unselected inhabitants, the people wit…	The Carlantino cohort comprehends about 1700 samples from an isolated village of southern Italy (Carlantino). Ethics approval was obtained from the Ethics Committee of the Burlo Garofolo children hospital in Trieste. Written informed consent was obtained from every participant of the study. All samples were typed with illumina 370k CNV chip (Illumina, San Diego, USA)	The LURIC study consists of 3,316 Caucasian patients hospitalized for coronary angiography between 1997 and 2000 at a tertiary care center in Southwestern Germany 51. Clinical indications for angiography were chest pain or a positive non-invasive stress test suggestive of myocardial ischemia. To limit clinical heterogeneity, individuals suffering from acute illnesses other than acute coronary syn…	The LURIC study consists of 3,316 Caucasian patients hospitalized for coronary angiography between 1997 and 2000 at a tertiary care center in Southwestern Germany 51. Clinical indications for angiography were chest pain or a positive non-invasive stress test suggestive of myocardial ischemia. To limit clinical heterogeneity, individuals suffering from acute illnesses other than acute coronary syn…	GENOA is one of four networks in the NHLBI Family-Blood Pressure Program (FBPP). GENOA's long-term objective is to elucidate the genetics of target organ complications of hypertension, including both atherosclerotic and arteriolosclerotic complications involving the heart, brain, kidneys, and peripheral arteries. The longitudinal GENOA Study recruited European-American and African-American sibshi…	GENOA is one of four networks in the NHLBI Family-Blood Pressure Program (FBPP). GENOA's long-term objective is to elucidate the genetics of target organ complications of hypertension, including both atherosclerotic and arteriolosclerotic complications involving the heart, brain, kidneys, and peripheral arteries. The longitudinal GENOA Study recruited European-American and African-American sibshi…	The Reykjavik Study cohort originally comprised a random sample of 30,795 men and women born in 1907-1935 and living in Reykjavik in 1967. A total of 19,381 attended, resulting in 71% recruitment rate. Between 2002 and 2006, the AGES-Reykjavik study re-examined 5,764 survivors of the original cohort who had participated before in the Reykjavik Study. [Harris, T. B. et al. (2007). American Journal…	The Rotterdam Study is a prospective population-based cohort study, which started in 1990 in the Ommoord district, in the city of Rotterdam, the Netherlands. All inhabitants of the Ommoord district aged 55 years or older were invited to participate(n = 10,215). No other inclusion or exclusion criteria were applied. At baseline, from 1990 through 1993, 7983 participants (response rate78%)were incl…	The Rotterdam Study is a prospective population-based cohort study, which started in 1990 in the Ommoord district, in the city of Rotterdam, the Netherlands. All inhabitants of the Ommoord district aged 55 years or older were invited to participate(n = 10,215). No other inclusion or exclusion criteria were applied. At baseline, from 1990 through 1993, 7983 participants (response rate78%)were incl…	The Rotterdam Study is a prospective population-based cohort study, which started in 1990 in the Ommoord district, in the city of Rotterdam, the Netherlands. All inhabitants of the Ommoord district aged 55 years or older were invited to participate(n = 10,215). No other inclusion or exclusion criteria were applied. At baseline, from 1990 through 1993, 7983 participants (response rate78%)were incl…	The KORA study is a series of independent population-based epidemiological surveys of participants living in the region of Augsburg, Southern Germany. All survey participants are residents of German nationality identified through the registration office and were examined. KORA F3 is a 10-year follow-up examination of participants from baseline survey S3 from 1994/1995. KORA S4 is the baseline sur…	The KORA study is a series of independent population-based epidemiological surveys of participants living in the region of Augsburg, Southern Germany. All survey participants are residents of German nationality identified through the registration office and were examined. KORA F3 is a 10-year follow-up examination of participants from baseline survey S3 from 1994/1995. KORA S4 is the baseline sur…	The Cardiovascular Health Study (CHS) is a population-based cohort study of risk factors for coronary heart disease and stroke in adults ≥65 years conducted across four field centers [PMID: 1669507]. The original predominantly European ancestry cohort of 5,201 persons was recruited in 1989-1990 from random samples of the Medicare eligibility lists; subsequently, an additional predominantly Africa…	The Cardiovascular Health Study (CHS) is a population-based cohort study of risk factors for coronary heart disease and stroke in adults ≥65 years conducted across four field centers [PMID: 1669507]. The original predominantly European ancestry cohort of 5,201 persons was recruited in 1989-1990 from random samples of the Medicare eligibility lists; subsequently, an additional predominantly Africa…	The Orkney Complex Disease Study (ORCADES) is a family-based study in the isolated Scottish archipelago of Orkney. Genetic diversity in this population is decreased compared to Mainland Scotland, consistent with the high levels of endogamy historically. Fasting blood samples were collected and over 500 health-related phenotypes and environmental exposures were measured in each individual. All par…	The BioMe Biobank Program is an ongoing, prospective, hospital- and outpatient- based population research program operated by The Charles Bronfman Institute for Personalized Medicine (IPM) at Mount Sinai. BioMe has enrolled over 50,000 participants between September 2007 and December 2020. BioMe is an Electronic Medical Record (EMR)-linked biobank that integrates research data and clinical care i…	The BioMe Biobank Program is an ongoing, prospective, hospital- and outpatient- based population research program operated by The Charles Bronfman Institute for Personalized Medicine (IPM) at Mount Sinai. BioMe has enrolled over 50,000 participants between September 2007 and December 2020. BioMe is an Electronic Medical Record (EMR)-linked biobank that integrates research data and clinical care i…	The BioMe Biobank Program is an ongoing, prospective, hospital- and outpatient- based population research program operated by The Charles Bronfman Institute for Personalized Medicine (IPM) at Mount Sinai. BioMe has enrolled over 50,000 participants between September 2007 and December 2020. BioMe is an Electronic Medical Record (EMR)-linked biobank that integrates research data and clinical care i…	The NEO study is a population-based, prospective cohort study designed to investigate pathways that lead to obesity-related diseases. The NEO study started in 2008 and includes 6,671 individuals aged 45–65 years, with an oversampling of individuals with overweight or obesity. The study design and population is described in detail elsewhere (10). Men and women living in the greater area of Leiden …	TRAILS (TRacking Adolescents' Individual Lives Survey) is a prospective cohort study of Dutch adolescents with bi- or triennial measurements from age 11 to at least age 25 and consists of a general population (TRAILS pop) and a clinical (TRAILS CC) cohort. Both cohorts were selected from the North of The Netherlands. Data collection in the population cohort started in 2001 (response rate 76%). To…	TRAILS (TRacking Adolescents' Individual Lives Survey) is a prospective cohort study of Dutch adolescents with bi- or triennial measurements from age 11 to at least age 25 and consists of a general population (TRAILS pop) and a clinical (TRAILS CC) cohort. Both cohorts were selected from the North of The Netherlands. Data collection in the clinical cohort started in 2004 (response rate 43%). To d…	Heinz Nixdorf Recall study is a population based cohort study consisting of 4814 participants, aged 45 to 75 years (50% women) at baseline. The study participants were randomly selected from the registration lists of the densely populated Ruhr metropolitan cities in Germany (residents of Essen, Bochum, and Mülheim an der Ruhr) between December 2000 and August 2003.	Heinz Nixdorf Recall study is a population based cohort study consisting of 4814 participants, aged 45 to 75 years (50% women) at baseline. The study participants were randomly selected from the registration lists of the densely populated Ruhr metropolitan cities in Germany (residents of Essen, Bochum, and Mülheim an der Ruhr) between December 2000 and August 2003.	Heinz Nixdorf Recall study is a population based cohort study consisting of 4814 participants, aged 45 to 75 years (50% women) at baseline. The study participants were randomly selected from the registration lists of the densely populated Ruhr metropolitan cities in Germany (residents of Essen, Bochum, and Mülheim an der Ruhr) between December 2000 and August 2003.	Heinz Nixdorf Recall study is a population based cohort study consisting of 4814 participants, aged 45 to 75 years (50% women) at baseline. The study participants were randomly selected from the registration lists of the densely populated Ruhr metropolitan cities in Germany (residents of Essen, Bochum, and Mülheim an der Ruhr) between December 2000 and August 2003.	The Twin Interdisciplinary Neuroticism Study (TWINS) is a 3-wave study including > 800 twin pairs from the Northern part of the Netherlands. The aim of the study is to unravel why neuroticism reflects vulnerability to mental disorders. In this study, we focus on possible mechanisms underlying this vulnerability and their genetic and environmental origins. In total, 125 female twin pairs visited o…
TYPE	GWAS or Metabochip	GWAS	GWAS	GWAS	GWAS	GWAS	GWAS	GWAS	GWAS	GWAS	GWAS	GWAS	GWAS	GWAS	GWAS	GWAS	GWAS	GWAS	GWAS	GWAS	GWAS	GWAS	GWAS	GWAS	GWAS	GWAS	GWAS	GWAS	GWAS	GWAS	GWAS	GWAS	GWAS	GWAS	GWAS	GWAS	GWAS	GWAS	GWAS	GWAS	GWAS		GWAS	GWAS	GWAS	GWAS	GWAS	GWAS	GWAS
	OVERLAP between GWAS and Metabochip samples (Yes/No)	No	No	No	No	No	Yes, congruence checked	Yes, congruence checked	No	No	No	No	No	No	Yes	Yes	No	No	No	No	Yes	No	No	No	No	No	No	No	No	No	No	No	No	Yes	Yes	Blood samples were drawn from all participants at their baseline examination and DNA was subsequently extracted from available samples. Genotyping was performed at the General Clinical Research Center’s Phenotyping/Genotyping Laboratory at Cedars-Sinai among CHS participants who consented to genetic testing and had DNA available using the Illumina 370CNV BeadChip system (for European ancestry par…	No	No	No	No	No	No	No	No	No	No	No	No	No
GENOTYPING	Genotyping centre	Wellcome Trust Sanger Institute, Cambridge, UK	Wellcome Trust Sanger Institute, Cambridge, UK and the Laboratory Corporation of America, Burlington, NC, US	RUCDR New Jersey			SNP&SEQ Technology Platform in Uppsala (www.genotyping.se)	SNP&SEQ Technology Platform in Uppsala (www.genotyping.se)	Lifelines, Groningen, NL (new)	Lifelines, Groningen, NL	Affymetrix	Erasmus MC	DeCODE Genetics, Iceland	Milan University (UNIMI) and Lausanne University (UNIL)	Broad Institute, Boston, MA, USA	Broad Institute, Boston, MA, USA	Broad Institute of MIT and Harvard	Broad Institute of MIT and Harvard	Helmholtz Zentrum (Munich, Germany)	Wellcome Trust Sanger Institute	Genotyping was carried out according to manufacturer protocols at the SardiNIA Project Laboratory (Lanusei, Italy), at the Technological Center - Porto Conte Ricerche (Alghero, Italy) and at the National Institute on Aging Intramural Research Program Laboratory of Genetics (Baltimore, MD).		Sanger, UK	CBM, Trieste, Italy	CBM, Trieste, Italy	LURIC Study gGmbH, Heidelberg, Germany	LURIC Study gGmbH, Heidelberg, Germany	Genotyping Shared Resource, Advanced Genomic Technology Center, Mayo Clinic College of Medicine	Genotyping Shared Resource, Advanced Genomic Technology Center, Mayo Clinic College of Medicine	National Institute on Aging, NIH, Bethesda, MD				GAC, Helmholtz-Zentrum München	GAC, Helmholtz-Zentrum München	Cedars-Sinai	Cedars-Sinai	Munich GSF; Integrgane Paris: Gen-Probe Livingston	Cincinatti and Mount Sinai	Cincinatti and Mount Sinai	Cincinatti and Mount Sinai	Centre National de Génotypage (Paris, France)	Department of Genetics, University Medical Center Groningen, Groningen, The Netherlands	Department of Genetics, University Medical Center Groningen, Groningen, The Netherlands	Department of Genomics, Life & Brain GmbH, University of Bonn, Bonn, Germany	Department of Genomics, Life & Brain GmbH, University of Bonn, Bonn, Germany	Department of Genomics, Life & Brain GmbH, University of Bonn, Bonn, Germany	Department of Genomics, Life & Brain GmbH, University of Bonn, Bonn, Germany	Department of Genetics, University Medical Center Groningen, Groningen, The Netherlands
	Genotyping Array	modified Illumina 610k	Illumina Human Hap 550-quad	Affymetrix-Perlegen 5.0 and Affymetrix 6.0 in partly overlapping subset of samples	Illumina Human CNV370-Duo Array and Illumina HAP300 array	Illumina 318/370 K, Affymetrix 250 K, and Illumina 6 K	Illumina OmniExpress & MetaboChip	Illumina OmniExpress & MetaboChip	Illumina HumanCyto SNP	Illumina HumanCyto SNP	Affymetrix 500K and MIPS 50K combined	Illumina 660K beadchip	Illumina HumanHap-370CNV-Duo BeadChip	Illumina 1M-Duo	Affymetrix 6.0	Affymetrix 6.0	Affymetrix GeneChip Human Mapping 500k	Affymetrix GeneChip Human Mapping 500k	Illumina 317K, Illumina 370K, Illumina550K	Affymetrix 500K	Illumina HumanOmniExpress + Illumina Metabochip + Illumina Immunochip + Illumina Exomechip	ILLUMINA 550K, ILLUMINA 610K, and ILLUMINA 1M	Affymetrix SNP5.0	Illumina INFINIUM 370k CNV array	Illumina INFINIUM 370k CNV array	Affymetrix 6.0	Affymetrix 6.0	Affymetrix 6.0 + Illumina Human1M-Duo	Affymetrix 6.0 + Illumina Human1M-Duo	Illumina Hu370CNV	Illumina/HumanHap 550K V.3 ADHumanHap 550 V.3 DUO		Illumina/HumanHap610	Affymetrix Axiom	HumanOmniExpress 12v1, Illumina HumanOmni 2.5-4	Illumina 370CNV BeadChip system	Illumina Omni 1M	Illumina HAP300, Omni1, OmniX	Illumina HumanOmniExpressExome-8 v1.0	Illumina HumanOmniExpressExome-8 v1.0	Illumina HumanOmniExpressExome-8 v1.0	Illumina HumanCoreExome-24v1_A Beadchip	Illumina Cyto SNP12 v2	Illumina Cyto SNP12 v2	Illumina-OmniQuad	Illumina-OmniExpress	Illumina-HumanCoreExom	Illumina-HumanCoreExome	Illumina Cyto SNP12 v2
	Genotyping calling algorithm	Illumina GenomeStudio	Illumina GenomeStudio	Genotyper / Birdseed	Illumina Beadstation Genotyping Solution	BeadStudio	GenCall	GenCall	Beadstudio Genecall	Beadstudio Genecall		Illumina Beadstudio	Illumina Beadstudio	Beadstudio	Birdseed	Birdseed	BRLMM	BRLMM	BeadStudio	BRLMM	GenCall, only for Exomechip GenCall + ZCall	BEADSTUDIO-GENCALL v3.0	BRLMM	Beadstudio	Beadstudio	Birdseed v2	Birdseed v2	Birdseed and Genome Studio	Birdseed and Genome Studio	BeadStuido	Beadstudio Genecall	Beadstudio Genecall	Beadstudio Genecall	Affymetrix Software	GenomeStudie	BeadStudio	GenomeStudio	BeadStudio, GenomStudio	zCall (GenomeStudio)	zCall (GenomeStudio)	zCall (GenomeStudio)	GenCall	GenomeStudio	GenomeStudio	GenomeStudio	GenomeStudio	GenomeStudio	GenomeStudio	GenomeStudio
SAMPLE QC	Sample call rate [filter detail]	0,95	0,95	0,95	≥ 95%		≥95%	≥95%	>=98%	>=98%	>=97%	≥ 97.5%	>=96%	>95%	>=95%	>=95%	0,95	0,95	>98%	>=94%	>= 95% in HumanOmniExpress, or >= 98% in the other arrays	>=98%	>=95%	>=98%	>=98%	>98%	>98%	>= 95%	>= 95%	>97%	≥ 97.5%	≥ 97.5%	≥ 97.5%	>97%	>97%	>=95%	>=95%	>98%	≥ 98%	≥ 98%	≥ 98%	≥ 98%	≥ 95%	≥ 95%	≥ 95%	≥ 95%	≥ 95%	≥ 95%	≥ 95%
	Heterozygosity [filter detail]	Visually	Graphical outliers	-10 < F < 10	not applied	NA	(Fmean(F))/sd(Z)≥5	(Fmean(F))/sd(Z)≥5	NA	NA	het value within 5SD of mean, and without excess Mendelian errors		NA	above or below 3SD:heterozygosity upperbound 0.300519 lowerbound 0.273037	NA	NA	NA	NA	FDR=0.2				heterozygosity upperbound 0.2882 lowerbound 0.2735	NA	NA	NA	NA	NA	NA									NA	inbreeding coefficient < -0.1 or > 0.3 for common variants (MAF>1%); inbreeding coefficient < 0.4 or > 0.9 for rare variants (MAF<1%)	inbreeding coefficient < -0.1 or > 0.3 for common variants (MAF>1%); inbreeding coefficient < 0.4 or > 0.9 for rare variants (MAF<1%)	inbreeding coefficient < -0.1 or > 0.3 for common variants (MAF>1%); inbreeding coefficient < 0.4 or > 0.9 for rare variants (MAF<1%)	>3 SD from mean	>3SD from mean	>3SD from mean	>5 SD from mean	>5 SD from mean	>5 SD from mean	>5 SD from mean	>3SD from mean
	Other exclusions [filter detail]	gender discrepancy, relatedness	Population stratification was assessed by multidimensional scaling analysis and compared with Hapmap II (release 22) European descent (CEU), Han Chinese, Japanese and Yoruba reference populations; all individuals with non-European ancestry were removed. X chromosome non equal sex phenotype	X chromosome non equal sex phenotype	poor chip [2], ancestry outliers [3]	NA	Ethnic outliers, related individuals, duplicates, missing phenotypes use in the analysis	Ethnic outliers, related individuals, duplicates, missing phenotypes use in the analysis	NA	NA		sex mismatch	Caucasian ancestry >=89% (based on Structure analysis)	Genetic outliers (based on PCs), missing data on covariates	Genetic outliers (based on PCs), first degree relative, gender inconsistency	Genetic outliers (based on PCs), first degree relative, gender inconsistency	Gender inconsistency; First degree cryptic relationship	Gender inconsistency; First degree cryptic relationship	identical (non-twins and outliers according to pairwise IBS) samples excluded, sex mismatch (intermediateXF: 0.2-0.8)			Sex mismatch, Mendelian error	gender mismatch, relatedness, ethnic outliers	NA	NA	gender mismatch, relatedness	gender mismatch, relatedness	Identical twins and sex mismatch; >= 6 SDs on first 10 PCs	Identical twins and sex mismatch; >= 6 SDs on first 10 PCs	mismatch sex; mismatch other genotypes	sex mismatch	sex mismatch	sex mismatch	sex mismatch, excess heterozygosity, population outlier	sex mismatch, excess heterozygosity, population outlier	Sex mismatch, Discordance with prior genotyping	Sex mismatch, Discordance with prior genotyping	Duplicates, Gender mismatch, incorrect genomic sharing with relatives	Sex mismatch, Related Individuals and Ancestry Outliers	Sex mismatch, Related Individuals and Ancestry Outliers	Sex mismatch, Related Individuals and Ancestry Outliers	Outlying individuals were excluded on the basis of relatedness, non-European ancestry, sex discrepancy	Duplicate and MZ samples, sex mismatch, non-caucasians	Duplicate and MZ samples, sex mismatch, non-caucasians	sexcheck, related, ethnicity	sexcheck, related, ethnicity	sexcheck, related, ethnicity	sexcheck, related, ethnicity	Duplicate and MZ samples, sex mismatch, non-caucasians
SNP QC	MAF [filter detail]	0,01	0,01	0,01	≥0.01	0,01	≥1%	≥1%	> 1%	> 5%	>0.5%	> 10-6	>=1%	>=1%	>0.5%	>1%	>5%	>5%	>0.001	>=1%	>=1% in HumanOmniExpress or monorphic in the other arrays	>=1%	>=1%	>=1%	>=1%	>1%	>1%	0,01	0,01	<0.01								1%, monomorphic	>0	>0	>0		≥ 1% [exclude if MAF<1%]	≥ 1% [exclude if MAF<1%]	0,01	0,01	0,01	0,01	≥ 1% [exclude if MAF<1%]
	P HWE [filter detail]	p > 1*10-6	5	1	p>10-4	1	≥10E-6	≥10E-6	>10^-05	>10^-05	1	> 10-6	>10^-06	4	>10^5	>10^5	>10^-06	>10^-06	> 1e-6	>=1e-6	>10^-06	>=1e-6	>=1e-6	>10^-06	>10^-06	>0.0001	>0.0001	NA	NA	<1e-06	> 10-6	> 10-6	> 10-6	>10-6	>10-6	P <10-5	P <10-5	>10-6	p > 5x10-5	p > 5x10-5	p > 5x10-5	p > 1e-5	p> 10-4 [exclude if p≤10-4]	p> 10-4 [exclude if p≤10-4]	1*10-5	1*10-5	1*10-5	1*10-5	p> 10-4 [exclude if p≤10-4]
	Call rate [filter detail]	95% (99% for markers with MAF < 5%)	0,95	0,95	≥0.95	0,98	MAF<5%: 99%; MAF≥5%: 95%	MAF<5%: 99%; MAF≥5%: 95%	>95%	>95%	>95%	≥ 97.5%	>=96%	>99%	>95%	>95%	>95%	>95%	>98%	>=90%	>=98%	>=98%	>=95%	>95%	>95%	>95%	>95%	>95%	>95%	<97%	≥ 97.5%	≥ 97.5%	≥ 97.5%	>98%	>98%	>=97%	>=97%	>97%	≥ 95%	≥ 95%	≥ 95%	>98%	≥ 95% [exclude if <95%]	≥ 95% [exclude if <95%]	≥ 95%	≥ 95%	≥ 95%	≥ 95%	≥ 95% [exclude if <95%]
	Other			Mendelian inconsistencies/ Allele Freq difference < 0.20 from reference / Strand Ambiguous only if MAF < 0.35		Mendelian inconsistencies.	NA	NA	NA	NA					NA	NA	SNPs that map to multiple locations on the genome	SNPs that map to multiple locations on the genome		heterozygosity, relatedness, ethnic outliers	males heterozygosity chromosome X <=2%. Mendelian errors (>1% of the families or >1 for HumanExome SNPs called with Zcall)	heterozygosity, relatedness, ethnic outliers	na															NA	removed A/T and G/C SNPs and any SNPs that deviate from 1kg	removed A/T and G/C SNPs and any SNPs that deviate from 1kg	removed A/T and G/C SNPs and any SNPs that deviate from 1kg		Chr X SNPs >1% heterozygous in men	Chr X SNPs >1% heterozygous in men					Chr X SNPs >1% heterozygous in men
	SNPs that met QC criteria		477482	362267-110706	325958	678524	738879	1587454	232571	257581	420953	557192	323414	883319	682749	773317	389878	389878	318237	386170	891532	501404 for ILLUMINA 550K, 530979 for ILLUMINA 610K, 910456 for ILLUMINA 1M	360602	183896	296968	686195	686195	550,325 (Affymetrix) 780,147 (Illumina)		324602	512349	466389	514073	558446	588307	316430	963248	287208; 843723: 654651	768517	768517	768517	361046	260127	260127	682618	646304	256445	255584	260127
IMPUTATION STATS	Imputation software	IMPUTE2	IMPUTE2	Mach 1.0 / Minimac	IMPUTE (v2, genotyped SNPs used where available)	miniMACH	SNPTEST (v2.4.1)	SNPTEST (v2.4.1)	Shapeit v2.11+Impute2	Shapeit v2.11+Impute2	MACH (version 1.0.15 )	Impute	Impute2	Shapeit2 and Impute2	ShapeIt (v1.r532) + Impute2	ShapeIt (v1.r532) + Impute2	Shapeit2 and Impute2	Shapeit2 and Impute2	MiniMac (Release 2012-10-13)	ShapeIT 1, IMPUTE 2.2.2	MaCH / minimac2	MaCH / minimac	ShapeIT v1, IMPUTE 2.2.2	Impute2	Impute2	IMPUTE2	IMPUTE2	SHAPEIT v2.r & IMPUTE2	SHAPEIT v2.r & IMPUTE2	Mach/minimac (IMPUTE2 for chrX)	MACH/minimac	MACH/minimac	MACH/minimac	SHAPEIT v2/IMPUTE v2.3.0	SHAPEIT v2/IMPUTE v2.3.0	MACH/minimac	IMPUTE version 2.2.2	IMPUTE version 2.2.2	Impute	Impute	Impute	IMPUTE2	Impute v2.2.2	Impute v2.2.2	Impute v2.3.1	Impute v2.3.1	Impute v2.3.1	Impute v2.3.1	Impute v2.2.2
	Date of 1000G map and version	1000 Genomes Phase I integrated variant set (v3 / April 2012; NCBI build 37 / hg19)	phase1 v3	phase1 v3	v3	phase 1v3	March 2012 (v3) 1000G reference panel	March 2012 (v3) 1000G reference panel	March 2012 (v3) 1000G reference panel	March 2012 (v3) 1000G reference panel	March 2012 (v3) 1000G reference panel	March 2012 (v3) 1000G reference panel	Phase I v3	March 2012 (v3) 1000G reference panel	March 2012 (v3) 1000G reference panel	March 2012 (v3) 1000G reference panel	March 2012 (v3) 1000G reference panel	March 2012 (v3) 1000G reference panel	March 2012 (v3) 1000G reference panel	March 2012 (v3) 1000G reference panel	March 2012 (v3) 1000G reference panel	March 2012 (v3) 1000G reference panel	March 2012(v3)	Phase I v3	Phase I v3	March 2012(v3)	March 2012(v3)	March 2012 (v3) 1000G reference panel	March 2012 (v3) 1000G reference panel	1000G PhaseI v3	1000G Phase I V3	1000G Phase I V3	1000G Phase I V3	1000g phase1 all (ALL_1000G_phase1integrated_v3_impute_mac1)	1000g phase1 all (ALL_1000G_phase1integrated_v3_impute_mac1)	1000G Phase I V3	1000G Phase I V3	March 2012 version3	March 2012 v3	March 2012 v3	March 2012 v3	2011 v3	March 2012 (phase 1 integrated v3)	March 2012 (phase 1 integrated v3)	1000G Phase 3 (October 2014)	1000G Phase 3 (October 2014)	1000G Phase 3 (October 2014)	1000G Phase 3 (October 2014)	March 2012 (phase 1 integrated v3)
	Imputation quality metrics type	Info	Info	Rsq	no filtering done post-imputation	Rsq	Proper_info Column from SNPTEST	Proper_info Column from SNPTEST	INFO Column from SNPTEST	INFO Column from SNPTEST	INFO	INFO Column from SNPTEST	INFO SNPtest	INFO file	INFO	INFO	INFO Column from SNPTEST	INFO Column from SNPTEST	Rsq from MiniMac	INFO from IMPUTE2	Rsq column from minimac	Rsq from MiniMac	INFO from IMPUTE2	INFO SNPtest	INFO SNPtest	INFO from IMPUTE2	INFO from IMPUTE2	INFO	INFO	Rsq from MaCH (IMPUTE2 info for chrX)	MACHR2	MACHR2	MACHR2	INFO	INFO	oevar	oevar	RSq from ProbABEL	info	info	info	Rsq	no filtering done post-imputation	no filtering done post-imputation	no filtering done post-imputation	no filtering done post-imputation	no filtering done post-imputation	no filtering done post-imputation	no filtering done post-imputation
	Any SNP QC filters post-imputation applied?		0.5% maf	NA	no filtering done post-imputation	NA	no	no	no	no	no	no	Door jullie in te vullen	no	no	SNps showing strand issues	Monomorphic SNPs removed	Monomorphic SNPs removed	Monomorphic SNPs removed	na		monomorphic variants dropped	na	no	no	no	no	No	No		No	no	no	no	no	Effective allele count < 10	Effective allele count < 10	no	no	no	no		no filtering done post-imputation	no filtering done post-imputation	no filtering done post-imputation	no filtering done post-imputation	no filtering done post-imputation	no filtering done post-imputation	no filtering done post-imputation
DATA ANALYSIS	Trait transformation/covariates Heart Rate	No transformation / sex age age_sq bmi pc1 pc2 pc3	none/ covariates age age2 bmi sex pc1 pc2 pc3 pc4 pc5 pc6 pc7 pc8 pc9 pc10	none/ covariates: age, age2, sex, bmi, 3PCs, 2 dummies for gentoyping batch	No transformation / age + age2 + BMI + sex + first two PCs with age centered on its mean	none/age, sex, age2, bmi	No transformation / age + BMI + sex + PC1, PC2, PC3	No transformation / age + age-sq + BMI + sex + PC1, PC2, PC3	No transformation / age + age2 + BMI + sex + PCA (1-5)	No transformation / age + age2 + BMI + sex + PCA (1-5)	No transformation / age + age2+ BMI + sex +generation	no transformation, age age2, bmi, sex, PC1-4	No transformation / age + age2 + BMI + sex + PCAs	No transformation / age + age2 + BMI + sex + PCAs (1-10)	No transformation / age + age2 + BMI + sex + center + PCA (1-4)	No transformation / age + age2 + BMI + sex + center + PCA (1-4)	No transformation / age + age2 + BMI + sex + recuitment center	No transformation / age + age2 + BMI + sex + recuitment center	No transformation / age + age^2 + BMI + sex + village + year of enrollment	na	No transformation / age + age2 + BMI + sex	No transformation / age + age2 + BMI + sex + centers + genotype chips	NA	No transformation	No transformation	No transformation	No transformation	No transformation / age + age2 + BMI + sex + PCA (1-4)	No transformation / age + age2 + BMI + sex + PCA (1-10)	None	None	None	None	None	None	No transformation/age+age2+gend+factor(clinic)+bmi	No transformation/age+age2+gend+factor(clinic)+bmi	No transformation/ sex+age+age2+BMI+PCA1-10	residuals: PULSE ~ AGE + AGE^2 + BMI [+ SEX] + PC1 + PC2 + PC3 + PC4	residuals: PULSE ~ AGE + AGE^2 + BMI [+ SEX] + PC1 + PC2 + PC3 + PC4	residuals: PULSE ~ AGE + AGE^2 + BMI [+ SEX] + PC1 + PC2 + PC3 + PC4		residuals: HR ~ AGE + AGE^2 + BMI [+ SEX] + PC1 + PC2 + PC3 + PC4 + PC5 + PC6 + PC7 + PC8 + PC9 + PC10	residuals: HR ~ AGE + AGE^2 + BMI [+ SEX] + PC1 + PC2 + PC3 + PC4 + PC5 + PC6 + PC7 + PC8 + PC9 + PC10	No transformation / age + BMI + sex	No transformation / age + BMI + sex	No transformation / age + BMI + sex	No transformation / age + BMI + sex	residuals: HR ~ AGE + AGE^2 + BMI [+ SEX] + PC1 + PC2 + PC3 + PC4 + PC5 + PC6 + PC7 + PC8 + PC9 + PC10
	Software for analysis (version)	snptest	snptest_v2.5	Plink v1.07	SNPTEST v2.5	GenABEL, ProbABEL	SNPTEST (v2.4.1)	SNPTEST (v2.4.1)	SNPTEST (v2.4.1)	SNPTEST (v2.4.1)	R	SNPtest	SNPtest	Mach2Qtl V1.1.3 (2013-04-25)	FAST (1.8.mc)	FAST (1.8.mc)	SNPTEST (v2.5-beta4)	SNPTEST (v2.5-beta4)	ProbABEL (v. 0.4.3-2)	SNPTEST v2.4.0	EPACTS	kinship and lmekin in R package	SNPTEST v2.4.0			SNPTEST (v2.5-beta4)	SNPTEST (v2.5-beta4)	MMAP	MMAP	ProbABEL	GRIMP	GRIMP	GRIMP	SNPTEST2	SNPTEST2	R	R	ProbABEL	SNPTEST 2.4.1	SNPTEST 2.4.1	SNPTEST 2.4.1	ProbABEL	SNPTEST 2.5.0	SNPTEST 2.5.0	snptest 2.4.1	snptest 2.4.1	snptest 2.4.1	snptest 2.4.1	SNPTEST 2.5.0
	Analysis options (command line)	snptest -data "genfile" "phenotypefile" -missing_code NA -pheno clpulse -method score -frequentist 1 -cov_names sex clage clage_sq clbmi c1n c2n c3n -use_raw_phenotypes -o "outfile"	snptest_v2.5 -data ${genfile} ${samplefile} -missing_code NA -pheno bp -cov_names ageCenter age2Center bmi sex pc1 pc2 pc3 pc4 pc5 pc6 pc7 pc8 pc9 pc10 -use_raw_phenotypes -frequentist 1 -method expected -o ${outfile}	--dosage Zin noheader skip0=1 skip1=1 format=3 --linear	-hwe -method expected -frequentist 1		-frequentist 1 \ - method expected \	-frequentist 1 \ - method expected \	-frequentist 1 -method score -use_raw_phenotypes	-frequentist 1 -method score -use_raw_phenotypes	linear mixed model adjusted for family correlation	-frequentist 1 -method score -use_raw_phenotypes	-frequentist 1 -method score -use_raw_phenotypes	mach2qtl --datfile --pedfile --infofile --dosefile --samplesize > results.txt	--maf-cutoff 0 --mode genotype --linear-snp	--maf-cutoff 0 --mode genotype --linear-snp	-frequentist 1 -method expeted -hwe -use_raw_phenotypes	-frequentist 1 -method expeted -hwe -use_raw_phenotypes		expected	-kinf -field EC -test q.emmax		--method expected			-frequentist 1 -method expected -hwe -use_raw_phenotypes	-frequentist 1 -method expected -hwe -use_raw_phenotypes	NA	NA									--ngpreds 1	-frequentist 1 -method expected -use_raw_phenotypes -hwe -pheno pulse.resid.all	-frequentist 1 -method expected -use_raw_phenotypes -hwe -pheno pulse.resid.all	-frequentist 1 -method expected -use_raw_phenotypes -hwe -pheno pulse.resid.all		-use_raw_phenotypes -frequentist 1 -method expected -hwe -lower_sample_limit 50	-use_raw_phenotypes -frequentist 1 -method expected -hwe -lower_sample_limit 50					-use_raw_phenotypes -frequentist 1 -method expected -hwe -lower_sample_limit 50
	Data management and statistical analysis	R	R	SPSS, SAS, R	perl, excel, R	GenABEL, R	STATA 14	STATA 14	STATA version 13	STATA version 13	NA	SNPtest	SNPtest	STATA	NA	NA	STATA/SE 13.1	STATA/SE 13.1	STATA/SE 13.1; GenABEL (v. 3.0.2); R (v. 3.1.1)	Stata 13.1	bash / R	SAS and R package	Stata 13.1	R	R	SPSS, R	SPSS, R	SAS & R	SAS & R	R	R	R	R	R	R	R	R	R	R	R	R	SPSS, R	R	R	R	R	R	R	R
TRAIT CHARACTERISTICS	Trait Age (yrs)																																						AGE
	Men
	N	701	2377	732	181	1106	461	1081	1943	5542	3612	2478	268	1913	4201	1039	608	689	531	1132	2775	1775	532	441	173	1806	337	639	297	1347	1405	1176	1569	1803	1442	1262	295	710	1076	742	1419	2714	567	219	378	677	179	702	0
	Mean	61,39	12,81	43,93	5308884	48,74	70,13	70,99	50,9	48,73	39,92	74,99	6532989	48661	54.68	53.74	62.53	58.03	45,43	59.81	43,57	51.93	44.41	52.1	46.52	63,06	54,6	55,69	57,37	7652487	67,63	64,99	56,95	49,65	57,08	7289778	7263051	55,8	5091357	6763612	5335729	56,1	11,4	11,12	59,7	59,7	61,1	59,1
	SD	2,76	0,23	12,55	5553484	14,23	0,17	0,63	12,7	11,48	10,13	3,27	4270774	10161	5.7	5.96	10.13	10.23	16,08	9	17,58	13.85	7.36	15.74	19,8	9,77	12,5	10,77	10,52	5321877	7787	7,46	6,65	13,99	12,87	5593401	5751287	13,5	138602	9420579	1551399	6	1,5	0,45	7,5	7,6	7,8	8
	Median	60,79	12,83	45	52,61	49,24	70,12	70,99	50	47,85	40	74,49	65,47	49	55	53	63.55	58.33	42	60	42,1	53.91	44.25	52.99	51.56	63,77	55,61	56,34	56,86	76	67	62,54	56,63	50	57	72	71	56	51	66	54	57	11	11,09	60	61	62	59
	min	57,05	11,75	18	45,04	18,07	69,84	69,4	28	18,1	19	70,15	51,75	18	44	44	36.88	31.71	18	40	14	25.21	29.4	18.56	3.49	26,87	17,25	26,94	32,56	67	55	55	46	25	35	65	65	27	20	51	20	44	10	10,2	46	45	46	45
	max	69,34	14,08	64	64,96	84,71	72,28	71,5	75	89,86	78	83,28	72,02	84	66	66	90.54	83.63	88	77	93,9	91.04	57.1	84.72	82.4	88.46	87,85	89,87	86,59	94	100	94	89	74	84	95	92	90	89	89	89	66	18,1	12,39	74	75	75	76
	Women																							xxxx	xxxx
	N	916	2473	1414	340	1376	462		1848	7719	4271	2657	281	896	4719	1767	606	737	675	1285	3735	1948	709	625	268	611	304	781	704	1860	1600	1472	2068	1871	1509	1977	501	1070	1952	692	2437	2947	630	96	401	671	157	709	134
	Mean	61,56	12,8	41,76	5315218	47,81	70,26		48,1	48,52	40,12	75,65	6043925	48329	53.91	53.21	64.46	58.82	45,5	58.75	43,54	52.33	45.27	51.29	44.55	66,27	62,21	55,01	55,85	7631774	70,68	65,6	57,09	48,73	56,49	7189327	7297206	55,2	5214344	67	5374395	55,8	11,4	11,06	59,7	59,1	61	59,7	23,43
	SD	3,04	0,22	12,88	5554326	14,45	0,15		12	11,28	10,66	3,41	5248464	9144	5.69	5.64	10.41	9.98	16,47	9.03	17,46	13.36	7.15	16.33	20.41	9,71	10,66	10,83	11,47	5539589	8974	8044	7033	13,58	12,33	5146856	5666676	13,7	1519026	8878012	1628616	5,9	1,5	0,55	7,8	7,8	7,5	7,9	3,39
	Median	60,94	12,75	43	52,79	48	70,28		47	47,72	40	75,38	60,35	48	53	53	65.14	59.32	43	59	41,9	53.95	45.6	51.21	48.46	67,29	62,71	55,18	55,28	76	71	62,84	56,71	49	56	71	72	57	52	66	54	56	11	10,99	60	59	61	60	22,69
	min	56,77	11,75	18	45,08	16,65	69,94		28	18,1	19	69,37	50,52	23	44	44	42369	33.74	18	39	14	25.22	29.4	18.13	2.37	34,15	26,97	24,89	20,5	66	55	55	46	25	35	65	65	26	20	38	19	44	10	10,13	45	45	47	46	18,08
	max	69,77	14,25	65	65,02	86,07	70,76		75	89,9	79	83,39	71,14	93	66	65	86.42	85.84	84	77	96,4	93.63	57.5	91.81	82.25	92.1	90,71	82,97	91,17	95	101	99	97	74	84	98	93	91	89	89	89	66	17,8	12,3	75	75	75	76	31
	Trait BMI (kg/m^2)																																						BMI
	Men
	N	700	2377	732	181	1106	461	1081	1943	5542	3612	2478	268	1913	4201	1039	608	689	531	1130	2775	1774	532	441	173	1806	337	639	297	1347	1390	722	921	1803	1442	1257	294	710	1076	742	1419	2714	567	219	378	677	179	702	0
	Mean	27,57	19,51	26,16	231442	27,16	27,06	26,25	26,4	26,65	27,21	26,54	2712537	27421	27.45	28,02	28.24	26.68	25,9	26.62	26,12	28	27.59	26,5	26.32	27,57	27,44	30,27	57,37	2699348	25,72	27,44	27,88	27,47	27,98	2638208	2669858	28,2	2852245	2758893	2868506	29,7	17,7	17,9	28,1	28,2	28,7	28,2
	SD	4,27	3,41	4,45	1166777	4,12	3,73	3,39	3,7	3,57	4,16	3,57	3491621	3462	3.95	4.87	3.85	3.2	3,95	3.21	4,1	4.64	3.94	3.87	4.68	3,69	3,87	5,18	10,52	3782911	3038	3444	4127	4	3,86	3562035	4291054	3,9	6133908	4916302	5847935	4	2,9	2,9	3,7	3,9	4,6	4
	Median	27	18,76	25,69	23,3	26,7	26,9	26,25	26	26,25	26,75	26,3	26,6	27,1	26.95	27.55	42213	26.41	25,44	26.22	25,9	27.3	27.27	26	26.35	27,17	26,89	29,57	56,86	2672356	25,67	27,17	27,38	27	27,58	2606037	2637067	27,7	2777347	2662582	2780826	29,2	17	17,1	27,7	27,6	27,7	27,8
	min	18,75	8,77	15,95	20,4	15,85	17,7	16,69	17,2	14,43	16,36	15,24	20	16	17.21	15.46	42142	16.95	18,13	16.85	14,9	15.96	18.71	18,2	14.31	17,51	16,34	16,9	32,56	15876	14	19	17	15,93	18,98	1580193	1612445	17	1534021	1758784	155039	19,3	11	13,3	19,9	18,1	18,3	19,4
	max	68,39	37,27	50,21	24,9	48,6	43,4	46,34	44,7	48,92	56,54	45,14	43,9	47,43	56.26	54.41	46.71	43.89	42,75	42.06	42,9	63.57	49.64	43.5	39.45	46.24	42,02	58,26	86,59	4059818	41	41	60	55,11	43,56	4323701	3815982	47,1	5798935	5710082	5950991	54,4	35	28,6	41,9	47	49,4	45,3
	Women								xxxx															xxxx	xxxx
	N	916	2473	1414	340	1376	462		1848	7719	4271	2657	281	896	4719	1767	606	737	675	1284	3735	1948	709	625	268	611	304	781	704	1860	1550	913	1221	1871	1509	1973	499	1070	1952	692	2437	2947	630	96	401	671	157	709	134
	Mean	27,81	19,99	25,23	2238794	26,51	27,13		25,9	26,15	25,06	27,09	2669893	26738	26.56	30.69	42033	26.77	25,17	26.1	24,71	27.53	26.48	24.53	26,3	27,21	27,33	30,39	32,28	2720088	26,74	27,63	27,54	26,87	27,17	2620791	2946079	27,7	3139231	2571053	2979987	30,2	18,1	18,2	27	27,5	28,3	27,8	22,9
	SD	5,09	3,47	5,14	1375685	4,97	4,91		4,8	4,69	5,3	4,65	4298093	4747	5.47	6.47	4.87	4.26	5,26	4.39	5	6.14	5.37	4.67	5.95	4,57	4,81	7,02	7,15	4851438	3961	4565	5055	5,21	5,15	4913437	5877582	5,5	8221843	5698884	6854364	5,5	3	2,9	5,1	5	5,5	5,1	3,5
	Median	26,92	19,34	24,1	22,3	25,8	26,5		25	25,31	13,77	26,67	26,1	26,2	25.39	29.7	28.52	26.22	24,18	25.5	23,8	26.27	25.31	23,9	25,9	26,95	26,57	29,27	31,72	2679345	26,26	27,04	26,77	25,94	26,47	2560345	2885682	26,7	299773	2479718	2865872	29,8	17,6	17,6	26	26,8	27,4	27,3	22,2
	min	14,79	13	14,7	20	15,54	16,6		18,2	13,88	13,6	15,61	19,1	16796	14.38	14,2	18.51	17.96	14,03	16.09	13,9	16.11	17.27	15,9	42138	16.35	16,77	15,79	17,51	1482868	15	14	16	15,84	15,07	1465062	1634317	18	1530793	1520776	1517924	17,2	12,7	14	16,9	17,2	19	16,5	16,2
	max	50,1	40,17	53,27	24,9	61,8	49,8		53,7	52,6	60,58	50,08	45,7	46,32	55.2	59.33	53.73	45.58	71,26	47.57	53,3	55.14	55.39	46.2	44.28	46.09	44,82	67,88	61,37	484676	49	48	51	51,22	51,43	4833157	5878506	53,9	5950991	5420636	5888814	61,2	33,9	27,3	54,2	49,8	51	50	41,5
	Trait HR (BPM)																																						HR
	HR assessment method	Peripheral pulse rate	Pulse rate	ECG	ECG	ECG	ECG	Peripheral pulse rate	ECG / Self-reported peripheral pulse rate / Peripheral pulse rate	ECG	ECG	ECG	Peripheral pulse rate	Peripheral pulse rate	Peripheral pulse rate	Peripheral pulse rate	Peripheral pulse rate	Peripheral pulse rate	HR was measured three times after a three-minute rest, using a blood pressure monitor HEM-705CP (OMRON); the median of the three measures was taken	Heart rate was measured with an Accutorr non‐invasive blood pressure monitor (Datascope Medical, Huntington, UK) after the participant had been seated for 5 min.	ECG	ECG	Peripheral pulse rate	ECG	ECG	HR was measured at least three times after a ten-minute rest, using an oscillometric device (Omron MX4, Omron Healthcare GmbH, Hamburg, Germany).	HR was measured at least three times after a ten-minute rest, using an oscillometric device (Omron MX4, Omron Healthcare GmbH, Hamburg, Germany).	Dinamap	Dinamap	ECG	ECG: EACTA, ASOTE, florence, italy; software: MEANS	ECG: EACTA, ASOTE, florence, italy; software: MEANS	ECG: EACTA, ASOTE, florence, italy; software: MEANS	ECG	ECG	ECG	ECG	ECG	data extracted from eMRs	data extracted from eMRs	data extracted from eMRs	ECG	ECG	ECG	Heart rate was assessed using ECG. If the value was missing then the HR was assessed during the blood pressure measurement and average of 2nd and 3rd readings was used	Heart rate was assessed using ECG. If the value was missing then the HR was assessed during the blood pressure measurement and average of 2nd and 3rd readings was used	Heart rate was assessed using ECG. If the value was missing then the HR was assessed during the blood pressure measurement and average of 2nd and 3rd readings was used	Heart rate was assessed using ECG. If the value was missing then the HR was assessed during the blood pressure measurement and average of 2nd and 3rd readings was used	ECG
	Men
	N	701	2377	732	181	1106	461	1081	1943	5542	3612	2478	268	1913	4201	1039	608	689	531	1132	2775	1775	532	441	173	1806	337	639	297	1347	1405	1176	1569	1803	1442	1262	295	710	1076	742	1419	2714	567	219	378	677	179	702	0
	Mean	69,78	72,85	70,08	6451934	61,64	59,44	65,16	67,2	66,82	66,03	64,92	6394403	75137	64.48	64.56	65.58	63.76	68,56	68.68	64,8	62.4	61.82	63.63	67.66	68,14	68,76	64,92	68,59	6478248	69,2	68,16	68,14	64,65	63,37	6296751	6732203	59,3	7719888	7431267	760895	64,4	74,8	72,3	68,2	67,9	70,6	70,1
	SD	12,2	10,81	9,7	9643415	11,45	9,17	8,79	12,3	11,42	12,26	12,03	10212381	8975	9.94	10.42	14.68	9.9	11,64	11.69	11,23	10.17	7.68	12.17	10.93	11,65	12,11	10,66	11,14	11888951	12,8	11,62	10998	11	11,29	1064113	1393723	9,7	1264144	1240551	1259518	11	10,5	10,7	10,9	11,6	12	12,7
	Median	68	72,5	69,68	64	60	58	65,16	65	65	64,86	63	63	75	63	63	68	64	68	67.5	64	62	60	62	66	66,67	68,33	64	67	63	67,4	66,67	66,67	63,56	61,98	61,5	66	59	76	74	76	63	74,4	71,1	68	66	69	69
	min	40	42,5	41,61	40	38	39	42	33	35	33,89	34	40	50	37	39	31	31	42	38	34	34	50	39	46	35.6	39,5	38,5	46	36	35,5	42	41	36,5	35,99	38	41	33	46	44	45	30	49,8	47,6	44	41	44	44
	max	117	115	108,74	96	140	96	76	146	113	118,69	120	103	100	105	105	96	93	115	115.5	112	105	96	108	109	114.67	110,33	109,5	106	111	122,45	118	107	107,3	107	117	133	93	127	117	125	121	111,7	110,7	104	115	109	136
	Women
	N	916	2473	1414	340	1376	462		1848	7719	4271	2657	281	896	4719	1767	606	737	675	1281	3735	1948	709	625	268	611	304	781	704	1860	1600	1472	2068	1871	1509	1977	501	1070	1952	692	2437	2947	630	96	401	671	157	709	134
	Mean	70,69	74,88	72,64	6744706	64,14	61,21		70,7	69,14	71,21	67,67	6599644	75089	67.38	67.39	67.79	65.74	73,37	72.82	69,25	66.14	64.22	66.89	72.8	69,28	70,36	68,2	71,1	6805269	70,68	70,51	70,71	66,13	64,73	6602934	6803792	61,6	7768135	7581069	767858	66,8	78,2	74,1	69,8	69,7	71,8	70,1	79,2
	SD	10,94	10,54	9,2	8994926	10,44	8,46		12,4	10,93	13,93	11,2	103515	8843	9.45	10.83	13.51	11.2	11,94	10.69	10,68	9.72	7.7	10.82	11.88	11,18	11,8	10,74	11,26	11612139	8974	10728	10,26	10,1	10,69	1096166	1114004	9,1	1179489	1149896	114977	10,8	11	10,4	10,8	10,5	12,4	10,7	10,4
	Median	69	74	72,27	66	63	61		70	68	69,88	67	65	76	67	66	70	66	72	72	68	66	64	66	72.8	68.33	68,33	67,5	70,5	67	71	69,77	69,77	65,5	63,03	65	67	61	77	75	76	66	77,6	74,4	69	69	70	69	78,8
	min	39	47,5	42,65	42	41	41		15,7	35	33,89	37	39	51	39	42	31	31	40	43.5	42	40	50	41	53	39	42,33	41,5	44	39	55	41	41	42,02	36,99	38	39	36	45	35	32	36	43,2	52,2	46	42	47	38	52,8
	max	111	116	104,79	98	122	92		176	113	134,53	117	121	100	106	105	98	99	121	113	112	105	91	107	117	111	112	104,5	114	114	101	115	111	108,3	107,9	170	100	96	127	124	126	121	116,2	100,3	143	118	110	114	104
	Categorical	N/A	N/A	N/A	N/A	N/A	N/A	N/A	N/A	N/A	N/A	N/A	N/A	N/A	N/A	N/A	N/A	N/A	N/A	N/A	N/A	N/A	N/A	N/A	N/A	N/A	N/A	N/A	N/A	N/A	N/A	N/A	N/A	N/A	N/A	N/A	N/A	N/A	N/A	N/A	N/A	N/A	N/A	N/A	N/A	N/A	N/A	N/A	N/A
REFERENCES	Reference study description (PMID)	Barker DJP, Osmond C, Forsen TJ, Kajantie E, Eriksson JG. Trajectories of growth among children who have coronary events as adults. N Engl J Med 2005; 353(17) :1802-1809.	Cohort Profile: the 'children of the 90s'--the index offspring of the Avon Longitudinal Study of Parents and Children. Boyd A, Golding J, Macleod J, Lawlor DA, Fraser A, Henderson J, Molloy L, Ness A, Ring S, Davey Smith G. Int J Epidemiol. 2013 Feb;42(1):111-27 (22507743) ; Fraser A, Macdonald-Wallis C, Tilling K, Boyd A, Golding J, Davey Smith G, Henderson J, Macleod J, Molloy L, Ness A, Ring S…	Penninx BW, Beekman AT, Smit JH, Zitman FG, Nolen WA, Spinhoven P, Cuijpers P,De Jong PJ, Van Marwijk HW, Assendelft WJ, Van Der Meer K, Verhaak P, Wensing M, De Graaf R, Hoogendijk WJ, Ormel J, Van Dyck R; NESDA Research Consortium. TheNetherlands Study of Depression and Anxiety (NESDA): rationale, objectives andmethods. Int J Methods Psychiatr Res. 2008;17(3):121-40. doi: 10.1002/mpr.256.PubMed…	Nature. 2007 Feb 22;445(7130):881-5 (PMID:17293876) Nat Genet. 2009 Feb;41(2):157-9 (PMID:19151714)	Pardo LM, MacKay I, Oostra B, van Duijn CM, Aulchenko YS. The effect of genetic drift in a young genetically isolated population. Ann Hum Genet. 2005;69:288–295. (PMID: 15845033)	PMID 16141402]; Lind, L. et al. A comparison of three different methods to evaluate endothelium-dependent vasodilation in the elderly: the Prospective Investigation of the Vasculature in Uppsala Seniors (PIVUS) study. Arterioscler Thromb Vasc Biol 25, 2368-75 (2005).	PMID 16030278; Ingelsson, E. et al. Insulin resistance and risk of congestive heart failure. JAMA 20, 334-41 (2005).	PMID 12356629	18075776	22832152	PMID: 10569329; PMID:12457784; PMID: 21977987	Galesloot TE, Vermeulen SH, Swinkels DW, de Vegt F, Franke B, den Heijer M, et al. Cohort Profile: the Nijmegen Biomedical Study(NBS). Int J Epidemiol 2016. In press.	PMID:22184326	PMID: 2646917	PMID: 2646917	PMID: 17463246	PMID: 17463246	PMID: 17550581	PMID: 10466767	PMID: 16934002	Higgins M, Province M, Heiss G, Eckfeldt J, Ellison RC, Folsom AR, et al. NHLBI Family Heart Study: objectives and design. Am J Epidemiol. 1996;143:1219-28. PMID: 10466767	PMID: 20519560	PMID: 31784700	PMID: 31784700	PMID: 11258203	PMID: 11258203	PMID: 11799070; 15121494	PMID: 11799070; 15121494	17351290	PMID: 22002080	PMID: 22002080	PMID: 22002080	PMID: 16032513, 16032514	PMID: 16032513, 16032514	PMID: 1669507	PMID: 1669507	PMID: 18760389	PMID: 25673413	PMID: 25673413	PMID: 25673413	PMID: 23576214	PMID: 25431468	PMID: 25431468	1) Stang A. et al. Baseline recruitment and analyses of nonresponse of the Heinz Nixdorf Recall Study: identifiability of phone numbers as the major determinant of response. Eur J Epidemiol. 2005;20(6):489-96. 2) Thanassoulis G. et al..Genetic associations with valvular calcification and aortic stenosis. N Engl J Med. 2013 Feb 7. 3) Pechlivanis S. et al. Coronary artery calcification and its rela…	1) Stang A. et al. Baseline recruitment and analyses of nonresponse of the Heinz Nixdorf Recall Study: identifiability of phone numbers as the major determinant of response. Eur J Epidemiol. 2005;20(6):489-96. 2) Thanassoulis G. et al..Genetic associations with valvular calcification and aortic stenosis. N Engl J Med. 2013 Feb 7. 3) Pechlivanis S. et al. Coronary artery calcification and its rela…	1) Stang A. et al. Baseline recruitment and analyses of nonresponse of the Heinz Nixdorf Recall Study: identifiability of phone numbers as the major determinant of response. Eur J Epidemiol. 2005;20(6):489-96. 2) Thanassoulis G. et al..Genetic associations with valvular calcification and aortic stenosis. N Engl J Med. 2013 Feb 7. 3) Pechlivanis S. et al. Coronary artery calcification and its rela…	1) Stang A. et al. Baseline recruitment and analyses of nonresponse of the Heinz Nixdorf Recall Study: identifiability of phone numbers as the major determinant of response. Eur J Epidemiol. 2005;20(6):489-96. 2) Thanassoulis G. et al..Genetic associations with valvular calcification and aortic stenosis. N Engl J Med. 2013 Feb 7. 3) Pechlivanis S. et al. Coronary artery calcification and its rela…	Riese H, Rijsdijk FV, Snieder H, Ormel J. The Twin Interdisciplinary Neuroticism Study. Twin Research and Human Genetics 2013; 16(1):268-270.
	Study link/ website	http://www.thl.fi/en_US/web/en/project?id=23572	http://www.bristol.ac.uk/alspac/	http://www.nesda.nl/	None	NA	http://www.medsci.uu.se/pivus/	http://www2.pubcare.uu.se/ULSAM/	www.prevend.org	www.lifelines.nl	https://framinghamheartstudy.org	NA	https://www.radboudumc.nl/en/trials/nijmegen-biomedical-study	http://www.hypergenes.eu/	http://www2.cscc.unc.edu/aric/	http://www2.cscc.unc.edu/aric/	http://www.broadinstitute.org/diabetes	http://www.broadinstitute.org/diabetes		https://www.epic-norfolk.org.uk	https://sardinia.irp.nia.nih.gov/	https://dsgweb.wustl.edu/fhscc/	http://www.mrc-epid.cam.ac.uk/research/studies/fenland					NA	NA	http://www.hjarta.is/english/ages	http://www.epib.nl/research/ergo.htm			http://www.helmholtz-muenchen.de/kora	http://www.helmholtz-muenchen.de/kora	https://chs-nhlbi.org	https://chs-nhlbi.org	http://www.orcades.ed.ac.uk/orcades/index.html	http://icahn.mssm.edu/research/institutes/institute-for-personalized-medicine/innovation-and-technology/biome-platform	http://icahn.mssm.edu/research/institutes/institute-for-personalized-medicine/innovation-and-technology/biome-platform	http://icahn.mssm.edu/research/institutes/institute-for-personalized-medicine/innovation-and-technology/biome-platform	https://www.lumc.nl/org/neo-studie/	http://www.trails.nl	http://www.trails.nl	https://www.uni-due.de/recall-studie/	https://www.uni-due.de/recall-studie/	https://www.uni-due.de/recall-studie/	https://www.uni-due.de/recall-studie/	n.a.
ACKNOWLEDGEMENTS	Funding	Helsinki Birth Cohort Study has been supported by grants from the Academy of Finland, the Finnish Diabetes Research Society, Folkhälsan Research Foundation, Novo Nordisk Foundation, Finska Läkaresällskapet, Signe and Ane Gyllenberg Foundation, University of Helsinki, Ministry of Education, Ahokas Foundation, Emil Aaltonen Foundation.	The UK Medical Research Council and the Wellcome Trust ((Grant ref: 217065/Z/19/Z) and the University of Bristol provide core support for ALSPAC. GWAS data for ALSPAC offspring was generated by Sample Logistics and Genotyping Facilities at the Wellcome Trust Sanger Institute and LabCorp (Laboratory Corporation of America) using support from 23andMe.NJT is a Wellcome Trust Investigator (202802/Z/1…	Funding was obtained from the Netherlands Organization for Scientific Research (Geestkracht program grant 10-000-1002); the Center for Medical Systems Biology (CSMB, NWO Genomics), Biobanking and Biomolecular Resources Research Infrastructure (BBMRI-NL), VU University’s Institutes for Health and Care Research (EMGO+) and Neuroscience Campus Amsterdam, University Medical Center Groningen, Leiden U…	The D.E.S.I.R. study has been supported by INSERM contracts with CNAMTS, Lilly, Novartis Pharma and Sanofi-Aventis; by INSERM (Réseaux en Santé Publique, Interactions entre les déterminants de la santé), Cohortes Santé TGIR, the Association Diabète Risque Vasculaire, the Fédération Française de Cardiologie, La Fondation de France, ALFEDIAM, Société francophone du diabète, ONIVINS, Abbott, Ardix M…	This study is financially supported by the Nutrigenomics Consortium (NGC) and by the Centre for Medical Systems Biology (CMSB) in the framework of the Netherlands Genomics Initiative (NGI).	C.M.L is supported by the Li Ka Shing Foundation, NIHR Oxford Biomedical Research Centre, Oxford, NIH (1P50HD104224-01), Gates Foundation (INV-024200), and a Wellcome Trust Investigator Award (221782/Z/20/Z).	C.M.L is supported by the Li Ka Shing Foundation, NIHR Oxford Biomedical Research Centre, Oxford, NIH (1P50HD104224-01), Gates Foundation (INV-024200), and a Wellcome Trust Investigator Award (221782/Z/20/Z).	PREVEND genetics is supported by the Dutch Kidney Foundation (Grant E033), the EU project grant GENECURE (FP-6 LSHM CT 2006 037697), the National Institutes of Health (grant 2R01LM010098), The Netherlands organization for health research and development (NWO-Groot grant 175.010.2007.006, NWO VENI grant 916.761.70, ZonMw grant 90.700.441), and the Dutch Inter University Cardiology Institute Nether…	The LifeLines Cohort Study, and generation and management of GWAS genotype data for the LifeLines Cohort Study is supported by the Netherlands Organization of Scientific Research NWO (grant 175.010.2007.006), the Economic Structure Enhancing Fund (FES) of the Dutch government, the Ministry of Economic Affairs, the Ministry of Education, Culture and Science, the Ministry for Health, Welfare and Sp…	he Framingham Heart Study is funded by National Institutes of Health contract N01-HC- 25195; HHSN268201500001I.	The PROSPER study was supported by an investigator initiated grant obtained from Bristol-Myers Squibb. Prof. Dr. J. W. Jukema is an Established Clinical Investigator of the Netherlands Heart Foundation (grant 2001 D 032). Support for genotyping was provided by the seventh framework program of the European commission (grant 223004) and by the Netherlands Genomics Initiative (Netherlands Consortium…	The set-up of NBS was financed by the four participating Radboudumc departments (Department for Health Evidence, Department of Laboratory Medicine, Department for Human Genetics, Department of Internal Medicine) and a small investment grant from the Radboudumc Executive Board amd the community health service Nijmegen also contributed funding.	Samples collected within the HYPERGENES project (European Network for Genetic-Epidemiological Studies: building a method to dissect complex genetic traits, using essential hypertension as a disease model), were funded by grant HEALTH-2007-201550, of the European Union within the FP7.	The Atherosclerosis Risk in Communities study has been funded in whole or in part with Federal funds from the National Heart, Lung, and Blood Institute, National Institutes of Health, Department of Health and Human Services (contract numbers HHSN268201700001I, HHSN268201700002I, HHSN268201700003I, HHSN268201700004I and HHSN268201700005I), R01HL087641, R01HL059367 and R01HL086694; National Human G…	The Atherosclerosis Risk in Communities study has been funded in whole or in part with Federal funds from the National Heart, Lung, and Blood Institute, National Institutes of Health, Department of Health and Human Services (contract numbers HHSN268201700001I, HHSN268201700002I, HHSN268201700003I, HHSN268201700004I and HHSN268201700005I), R01HL087641, R01HL059367 and R01HL086694; National Human G…	The DGI study was supported by a grant from Novartis. The Botnia PPP study was supported by grants from the Signe and Ane Gyllenberg Foundation; Swedish Cultural Foundation in Finland; Finnish Diabetes Research Society; the Sigrid Juselius Foundation; Folkhälsan Research Foundation; Foundation for Life and Health in Finland; Jakobstad Hospital; Medical Society of Finland; Närpes Research Foundati…	The DGI study was supported by a grant from Novartis. The Botnia PPP study was supported by grants from the Signe and Ane Gyllenberg Foundation; Swedish Cultural Foundation in Finland; Finnish Diabetes Research Society; the Sigrid Juselius Foundation; Folkhälsan Research Foundation; Foundation for Life and Health in Finland; Jakobstad Hospital; Medical Society of Finland; Närpes Research Foundati…	The MICROS study was supported by the Ministry of Health and Department of Educational Assistance, University and Research of the Autonomous Province of Bolzano, the South Tyrolean Sparkasse Foundation, and the European Union framework program 6 EUROSPAN project (contract no. LSHG-CT-2006-018947).	The EPIC-Norfolk study (DOI 10.22025/2019.10.105.00004) has received funding from the Medical Research Council (MR/N003284/1 MC-UU_12015/1 and MC_UU_00006/1) and Cancer Research UK (C864/A14136).	The SardiNIA study was funded in part by the National Institutes of Health (National Institute on Aging, National Heart Lung and Blood Institute, and National Human Genome Research Institute). This research was supported by National Human Genome Research Institute grants HG005581, HG005552, HG006513, and HG007022; by National Heart Lung and Blood Institute grant HL117626; by the Intramural Resear…	The Family Heart Study (FamHS) research was supported by NIH grants: R01-HL-117078 from NHLBI, and R01-DK-089256 from NIDDK.	The Fenland Study (10.22025/2017.10.101.00001)is funded by the Medical Research Council (MC_UU_12015/1).	This study was supported by ENDO-2020-23670288 to GG	This study was supported by Italian Ministry of Health—RC 01/21 to MPC	LURIC was supported by the 7th Framework Programs AtheroRemo (grant agreement number 201668) and RiskyCAD (grant agreement number 305739) of the European Union and the H2020 Program TO_AITON (grant agreement number 848146) of the European Union. The work of W.M. and M.E.K. is supported as part of the Competence Cluster of Nutrition and Cardiovascular Health (nutriCARD) which is funded by the Germ…	LURIC was supported by the 7th Framework Programs AtheroRemo (grant agreement number 201668) and RiskyCAD (grant agreement number 305739) of the European Union and the H2020 Program TO_AITON (grant agreement number 848146) of the European Union. The work of W.M. and M.E.K. is supported as part of the Competence Cluster of Nutrition and Cardiovascular Health (nutriCARD) which is funded by the Germ…	Support for the Genetic Epidemiology Network of Arteriopathy (GENOA) was provided by the National Institutes of Health (U01 HL054457, R01 HL087660, and R01 HL119443).	Support for the Genetic Epidemiology Network of Arteriopathy (GENOA) was provided by the National Institutes of Health (U01 HL054457, R01 HL087660, and R01 HL119443).	The Age, Gene/Environment Susceptibility Reykjavik Study has been funded by NIH contract N01-AG-12100, the NIA Intramural Research Program, Hjartavernd (the Icelandic Heart Association), and the Althingi (the Icelandic Parliament). The study is approved by the Icelandic National Bioethics Committee, (VSN: 00-063) and the Data Protection Authority.	The generation and management of GWAS genotype data for the Rotterdam Study is supported by the Netherlands Organisation of Scientific Research NWO Investments (nr. 175.010.2005.011, 911-03-012). This study is funded by the Research Institute for Diseases in the Elderly (014-93-015; RIDE2), the Netherlands Genomics Initiative (NGI)/Netherlands Organisation for Scientific Research (NWO) project nr…	The generation and management of GWAS genotype data for the Rotterdam Study is supported by the Netherlands Organisation of Scientific Research NWO Investments (nr. 175.010.2005.011, 911-03-012). This study is funded by the Research Institute for Diseases in the Elderly (014-93-015; RIDE2), the Netherlands Genomics Initiative (NGI)/Netherlands Organisation for Scientific Research (NWO) project nr…	The generation and management of GWAS genotype data for the Rotterdam Study is supported by the Netherlands Organisation of Scientific Research NWO Investments (nr. 175.010.2005.011, 911-03-012). This study is funded by the Research Institute for Diseases in the Elderly (014-93-015; RIDE2), the Netherlands Genomics Initiative (NGI)/Netherlands Organisation for Scientific Research (NWO) project nr…	The KORA study was initiated and financed by the Helmholtz Zentrum München – German Research Center for Environmental Health, which is funded by the German Federal Ministry of Education and Research (BMBF) and by the State of Bavaria. Furthermore, KORA research was supported within the Munich Center of Health Sciences (MC-Health), Ludwig-Maximilians-Universität, as part of LMUinnovativ.	The KORA study was initiated and financed by the Helmholtz Zentrum München – German Research Center for Environmental Health, which is funded by the German Federal Ministry of Education and Research (BMBF) and by the State of Bavaria. Furthermore, KORA research was supported within the Munich Center of Health Sciences (MC-Health), Ludwig-Maximilians-Universität, as part of LMUinnovativ.	This CHS research was supported by NHLBI contracts HHSN268201200036C, HHSN268200800007C, HHSN268201800001C, N01HC55222, N01HC85079, N01HC85080, N01HC85081, N01HC85082, N01HC85083, N01HC85086, 75N92021D00006; and NHLBI grants U01HL080295, R01HL087652, R01HL105756, R01HL103612, R01HL120393, and U01HL130114 with additional contribution from the National Institute of Neurological Disorders and Stroke…	This CHS research was supported by NHLBI contracts HHSN268201200036C, HHSN268200800007C, HHSN268201800001C, HHSN268200960009C, N01HC55222, N01HC85079, N01HC85080, N01HC85081, N01HC85082, N01HC85083, N01HC85086, 75N92021D00006; and NHLBI grants U01HL080295, R01HL087652, R01HL105756, R01HL103612, R01HL120393, U01HL130114, and R01HL085251 with additional contribution from the National Institute of N…	The Orkney Complex Disease Study (ORCADES) was supported by the Chief Scientist Office of the Scottish Government (CZB/4/276, CZB/4/710), a Royal Society URF to J.F.W., the MRC Human Genetics Unit quinquennial programme “QTL in Health and Disease”, Arthritis Research UK and the European Union framework program 6 EUROSPAN project (contract no. LSHG-CT-2006-018947). We acknowledge support from the …	The Mount Sinai BioMe Biobank has been supported by The Andrea and Charles Bronfman Philanthropies and in part by Federal funds from the NHLBI and NHGRI (X01HL134588; U01HG007417). Ruth Loos is funded by NIH (R01DK110113; R01DK107786; R01HL142302; R56HG010297)	The Mount Sinai BioMe Biobank has been supported by The Andrea and Charles Bronfman Philanthropies and in part by Federal funds from the NHLBI and NHGRI (X01HL134588; U01HG007417). Ruth Loos is funded by NIH (R01DK110113; R01DK107786; R01HL142302; R56HG010297)	The Mount Sinai BioMe Biobank has been supported by The Andrea and Charles Bronfman Philanthropies and in part by Federal funds from the NHLBI and NHGRI (X01HL134588; U01HG007417). Ruth Loos is funded by NIH (R01DK110113; R01DK107786; R01HL142302; R56HG010297)	The NEO study is supported by the Netherlands Cardiovascular Research Initiative, an initiative with support of the Dutch Heart Foundation (CVON2014-02 ENERGISE). D.O.M.-K. is supported by the Dutch Science Organization (ZonMW-VENI grant 916.14.023).	This research is part of the TRacking Adolescents' Individual Lives Survey (TRAILS). Participating centers of TRAILS include the University Medical Center and University of Groningen, the University of Utrecht, the Radboud Medical Center Nijmegen, and the Parnassia Bavo group, all in the Netherlands. TRAILS has been financially supported by various grants from the Netherlands Organization for Sci…	This research is part of the TRacking Adolescents' Individual Lives Survey (TRAILS). Participating centers of TRAILS include the University Medical Center and University of Groningen, the University of Utrecht, the Radboud Medical Center Nijmegen, and the Parnassia Bavo group, all in the Netherlands. TRAILS has been financially supported by various grants from the Netherlands Organization for Sci…	We thank the Heinz Nixdorf Foundation [Chairman: M. Nixdorf; Past Chairman: G. Schmidt‡], the “Deutsche Forschungsgemeinschaft” (Project numbers: PE 2309/2–1, ER 155/6–1 and ER 155/6–2) and the “Bundesministerium für Bildung und Forschung” for the generous support of this study. We thank the Ministry of Innovation, Science and Research, Nordrhine-Westfalia for the generous support for the genotyp…	We thank the Heinz Nixdorf Foundation [Chairman: M. Nixdorf; Past Chairman: G. Schmidt‡], the “Deutsche Forschungsgemeinschaft” (Project numbers: PE 2309/2–1, ER 155/6–1 and ER 155/6–2) and the “Bundesministerium für Bildung und Forschung” for the generous support of this study. We thank the Ministry of Innovation, Science and Research, Nordrhine-Westfalia for the generous support for the genotyp…	We thank the Heinz Nixdorf Foundation [Chairman: M. Nixdorf; Past Chairman: G. Schmidt‡], the “Deutsche Forschungsgemeinschaft” (Project numbers: PE 2309/2–1, ER 155/6–1 and ER 155/6–2) and the “Bundesministerium für Bildung und Forschung” for the generous support of this study. We thank the Ministry of Innovation, Science and Research, Nordrhine-Westfalia for the generous support for the genotyp…	We thank the Heinz Nixdorf Foundation [Chairman: M. Nixdorf; Past Chairman: G. Schmidt‡], the “Deutsche Forschungsgemeinschaft” (Project numbers: PE 2309/2–1, ER 155/6–1 and ER 155/6–2) and the “Bundesministerium für Bildung und Forschung” for the generous support of this study. We thank the Ministry of Innovation, Science and Research, Nordrhine-Westfalia for the generous support for the genotyp…	This research is part of the Twin Interdisciplinary Neuroti- cism Study (TWINS) supported by the Netherlands Or- ganisation for Health Research and Development (ZonMw 904-57-130) and NWO, Medische Wetenschappen (0804/904-57-130)
	Acknowledgements	We thank all study participants as well as everybody involved in the Helsinki Birth Cohort Study.	We are extremely grateful to all the families who took part in this study, the midwives for their help in recruiting them, and the whole ALSPAC team, which includes interviewers, computer and laboratory technicians, clerical workers, research scientists, volunteers, managers, receptionists and nurses. Ethical approval for the study was obtained from the ALSPAC Ethics and Law Committee and the Loc…			We thank the participants from the Genetic Research in Isolated Populations, Erasmus Rucphen Family who made this work possible.				We thank Behrooz Alizadeh, Annemieke Boesjes, Marcel Bruinenberg, Noortje Festen, Ilja Nolte, Lude Franke, Mitra Valimohammadi for their help in creating the GWAS database, and Rob Bieringa, Joost Keers, René Oostergo, Rosalie Visser, Judith Vonk for their work related to data-collection and validation. The authors are grateful to the study participants, the staff from the LifeLines Cohort Study …			The Nijmegen Biomedical Study is a population-based survey conducted at the Department for Health Evidence and the Department of Laboratory Medicine of the Radboud university medical center. Principal investigators of the Nijmegen Biomedical Study are L.A.L.M. Kiemeney, A.L.M. Verbeek, D.W. Swinkels en B. Franke.	To HYPERGENES consortium took part: University of Milano and Fondazione Filarete, University of Leuven, Division of Hypertension and Cardiovascular Rehabilitation, Department of Cardiovascular Diseases, Jagiellonian University Medical College, Krakow, IBM Israel – Science and Technology LTD, I.M.S. – Istituto di Management Sanitario S.r.l., Milan, Institute of Internal Medicine, Siberian Branch o…					We thank the primary care practitioners Raffaela Stocker, Stefan Waldner, Toni Pizzecco, Josef Plangger, Ugo Marcadent, and the personnel of the Hospital of Silandro (Department of Laboratory Medicine) for their participation and collaboration in the research project.	The genetics work in the EPIC-Norfolk study was funded by the Medical Research Council (MC_PC_13048). We are grateful to all the participants who have been part of the project and to the many members of the study teams at the University of Cambridge who have enabled this research	This work is dedicated to Prof. Antonio Cao, Prof. Renzo Galanello and Prof. Maurizio Longinotti, who devoted their scientific lives to understanding, preventing and treating hematological diseases in Sardinia. We are also grateful to Maria Serafina Ristaldi and Maria Giuseppina Marini for knowledge and insight that they freely shared with us. Finally, we thank all the volunteers who generously p…		We are grateful to all the volunteers and to the General Practitioners and practice staff for assistance with recruitment. We thank the Fenland Study Investigators, Fenland Study Co-ordination team and the Epidemiology Field, Data and Laboratory teams. We further acknowledge support for genomics from the Medical Research Council (MC_PC_13046).	We would like to thank all participants to this study. We are very grateful to the municipal administrators for their collaboration on the project and for logistic support. We would like to thank Cassa di Risparmio of Gorizia Foundation (CariGO) for the continuous support to research activities at the Cardiotoracovascular Department, University of Trieste.	We are very grateful to the municipal administrators for their collaboration on the project and for logistic support. We would like to thank all participants to this study.	We thank the LURIC study team who were either temporarily or permanently involved in patient recruitment as well as sample and data handling, in addition to the laboratory staff at the Ludwigshafen General Hospital and the Universities of Freiburg, Ulm, and Heidelberg, Germany.	We thank the LURIC study team who were either temporarily or permanently involved in patient recruitment as well as sample and data handling, in addition to the laboratory staff at the Ludwigshafen General Hospital and the Universities of Freiburg, Ulm, and Heidelberg, Germany.	Genotyping was performed at the Mayo Clinic (Stephen T. Turner, MD, Mariza de Andrade PhD, Julie Cunningham, PhD). We thank Eric Boerwinkle, PhD and Megan L. Grove from the Human Genetics Center and Institute of Molecular Medicine and Division of Epidemiology, University of Texas Health Science Center, Houston, Texas, USA for their help with genotyping. We would also like to thank the families th…	Genotyping was performed at the Mayo Clinic (Stephen T. Turner, MD, Mariza de Andrade PhD, Julie Cunningham, PhD). We thank Eric Boerwinkle, PhD and Megan L. Grove from the Human Genetics Center and Institute of Molecular Medicine and Division of Epidemiology, University of Texas Health Science Center, Houston, Texas, USA for their help with genotyping. We would also like to thank the families th…	The researchers are indebted to the participants for their willingness to participate in the study.	We thank Pascal Arp, Mila Jhamai, Marijn Verkerk, Lizbeth Herrera and Marjolein Peters for their help in creating the GWAS database, and Karol Estrada and Maksim V. Struchalin for their support in creation and analysis of imputed data. The authors are grateful to the study participants, the staff from the Rotterdam Study and the participating general practitioners and pharmacists.	We thank Pascal Arp, Mila Jhamai, Marijn Verkerk, Lizbeth Herrera and Marjolein Peters for their help in creating the GWAS database, and Karol Estrada and Maksim V. Struchalin for their support in creation and analysis of imputed data. The authors are grateful to the study participants, the staff from the Rotterdam Study and the participating general practitioners and pharmacists.	We thank Pascal Arp, Mila Jhamai, Marijn Verkerk, Lizbeth Herrera and Marjolein Peters for their help in creating the GWAS database, and Karol Estrada and Maksim V. Struchalin for their support in creation and analysis of imputed data. The authors are grateful to the study participants, the staff from the Rotterdam Study and the participating general practitioners and pharmacists.					DNA extractions were performed at the Edinburgh Clinical Research Facility, University of Edinburgh. We would like to acknowledge the invaluable contributions of the research nurses in Orkney, the administrative team in Edinburgh and the people of Orkney.	We thank all participants in the Mount Sinai Biobank. We also thank all our recruiters who have assisted and continue to assist in data collection and management and are grateful for the computational resources and staff expertise provided by Scientific Computing at the Icahn School of Medicine at Mount Sinai.	We thank all participants in the Mount Sinai Biobank. We also thank all our recruiters who have assisted and continue to assist in data collection and management and are grateful for the computational resources and staff expertise provided by Scientific Computing at the Icahn School of Medicine at Mount Sinai.	We thank all participants in the Mount Sinai Biobank. We also thank all our recruiters who have assisted and continue to assist in data collection and management and are grateful for the computational resources and staff expertise provided by Scientific Computing at the Icahn School of Medicine at Mount Sinai.	he authors thank all individuals who participated in the NEO study and all participating general practitioners for inviting eligible participants. The authors also thank the NEO study group, Pat van Beelen (Department of Clinical Epidemiology, Leiden University Medical Center) and all research nurses for data collection, Petra Noordijk (Department of Clinical Epidemiology, Leiden University Medic…	We are grateful to everyone who participated in this research or worked on this project to make it possible.	We are grateful to everyone who participated in this research or worked on this project to make it possible.	We are indebted to all the study participants and to the dedicated personnel of the study center of the Heinz Nixdorf Recall study as well as to the investigative group. Technical support for the imputation of the Heinz Nixdorf Recall Study data on the Supercomputer Cray XT6m was provided by the Center for Information and Media Services, University of Duisburg-Essen.	We are indebted to all the study participants and to the dedicated personnel of the study center of the Heinz Nixdorf Recall study as well as to the investigative group. Technical support for the imputation of the Heinz Nixdorf Recall Study data on the Supercomputer Cray XT6m was provided by the Center for Information and Media Services, University of Duisburg-Essen.	We are indebted to all the study participants and to the dedicated personnel of the study center of the Heinz Nixdorf Recall study as well as to the investigative group. Technical support for the imputation of the Heinz Nixdorf Recall Study data on the Supercomputer Cray XT6m was provided by the Center for Information and Media Services, University of Duisburg-Essen.	We are indebted to all the study participants and to the dedicated personnel of the study center of the Heinz Nixdorf Recall study as well as to the investigative group. Technical support for the imputation of the Heinz Nixdorf Recall Study data on the Supercomputer Cray XT6m was provided by the Center for Information and Media Services, University of Duisburg-Essen.
[truncated: 49 more columns]

## Sheet: SD2
Supplementary Data 2: 493 Genome-wide significant RHR SNPs. All 493 Genome-wide significant RHR SNPs are shown. Summary statistics of the SNPs is provided for the full meta-analyses, the UK Biobank GWAS and the IC-RHR meta-analyses. Genes annotated to the SNPs are shown for all four approaches. LDSC intercept corrected SE and P-value's of the UK Biobank and IC-RHR effect sizes were used for the m…
												Meta-analyses																Genes				UK Biobank										IC-RHR
MarkerName	SNP	band	CHR	BP	Locus	LocusID	Replicated	New GV compared to Guo et al.	New GV compared to Eppinga et al.	New GV compared to Den hoed et al.	New GV	A1	A2	A1FREQ	A1FREQ_SE	A1FREQ_min	A1FREQ_max	Beta	SE	P-value	Direction	HetISq	HetChiSq	HetDf	HetPVal	TotalSampleSize	EffectiveSampleSize	Nearest	eQTL	Coding	DEPICT	A1	A2	A1FREQ	Beta	SE	P-value	SE, LDSC intercept correct	P-value, LDSC intercept corrected	Proxy UKB	LD UKB	A1	A2	A1FREQ	Beta	SE	P-value	SE, LDSC intercept correct	P-value, LDSC intercept corrected
1:10099661_C_T	rs184840810	p36.22	1	10099661	0	337	No, not in IC-RHR	0	0	1	0	T	C	0.9966	0.0003	0.9952	0.9966	-1.1824	0.2011	4.13e-09	--	19.5	1.243	1	0.265	548837	3546	UBE4B	-	-	-	T	C	0.996631	-1.12872	0.194368	7.9e-10	0.206826	4.83331e-08	-	-	C	T	0.0048	2.1182	0.8548	0.01321	0.863179	0.0141295
1:10357806_C_G	rs112682076	p36.22	1	10357806	0	337	Yes	0	0	1	0	C	G	0.0097	0.0009	0.008	0.0102	0.9368	0.1033	1.172e-19	++	0	0.492	1	0.4831	712174	12190	KIF1B	-	-	-	G	C	0.989788	-0.974449	0.109377	1.6e-18	0.116388	5.64344e-17	-	-	G	C	0.992	-0.7975	0.2217	0.0003221	0.223873	0.00036764
1:10731307_A_AAG	rs149872714	p36.22	1	10731307	1	337	Yes	0	0	1	0	A	AAG	0.0396	0.0004	0.0393	0.0402	0.4954	0.047	5.789e-26	++	0	0.187	1	0.6652	825007	59621.7	CASZ1	-	CASZ1	CASZ1	AAG	A	0.960727	-0.510841	0.055467	1.8e-20	0.0590222	4.92632e-18	-	-	A	AAG	0.0402	0.4686	0.077	1.148e-09	0.0777548	1.67402e-09
1:110136884_C_T	rs41280328	p13.3	1	110136884	1	169	Yes	1	1	1	1	T	C	0.9724	0.0032	0.9685	0.9751	0.3979	0.0565	1.814e-12	++	0	0.231	1	0.6307	815414	41953.7	GNAI3,GNAT2	-	-	GNAI3	T	C	0.975099	0.420435	0.0689234	5.5e-10	0.0733411	9.89044e-09	-	-	C	T	0.0315	-0.3652	0.0876	3.038e-05	0.0884587	3.65165e-05
1:112133445_C_T	rs72695256	p13.2	1	112133445	1	41	Yes	0	1	1	0	T	C	0.8246	0.0002	0.8243	0.8247	0.1431	0.0238	1.951e-09	++	0	0.073	1	0.7866	837059	231810	RAP1A	-	-	C1orf183	T	C	0.824733	0.148198	0.0284705	1.2e-07	0.0302953	9.99305e-07	-	-	C	T	0.1757	-0.1349	0.0383	0.0004304	0.0386754	0.000486641
1:150635774_C_T	rs6587517	q21.3	1	150635774	1	59	Yes	1	1	1	1	T	C	0.105	0.019	0.0887	0.1272	0.1896	0.0308	7.142e-10	++	0	0.052	1	0.8195	835310	137621	GOLPH3L	-	-	ARNT,ADAMTSL4,MCL1,SETDB1	T	C	0.0887314	0.183595	0.0380925	5.1e-06	0.0405341	5.91516e-06	-	-	C	T	0.8728	-0.1978	0.0468	2.351e-05	0.0472587	2.84577e-05
1:156468243_A_T	rs10908505	q22	1	156468243	1	270	Yes	0	1	1	0	A	T	0.6442	0.0021	0.6425	0.6468	0.1633	0.0189	5.975e-18	++	0	0.809	1	0.3685	834648	373493	MEF2D	-	-	MEF2D	T	A	0.357501	-0.149781	0.0227113	6.3e-12	0.024167	5.72764e-10	-	-	T	A	0.3532	-0.1847	0.0301	8.77e-10	0.030395	1.2272e-09
1:173868955_C_T	rs6691053	q25.1	1	173868955	1	114	Yes	0	1	1	0	T	C	0.2228	0.0039	0.2198	0.2279	-0.1429	0.0219	7.488e-11	--	0	0.673	1	0.4119	807400	271896	ZBTB37,SERPINC1	-	-	ZBTB37	C	T	0.780242	0.156683	0.0259928	1.1e-09	0.0276588	1.47157e-08	-	-	C	T	0.7721	0.1194	0.0357	0.0008303	0.0360499	0.000926074
1:183399613_A_G	rs1338373	q25.3	1	183399613	1	120	Yes	0	1	1	0	A	G	0.4372	0.0003	0.4368	0.4374	0.1195	0.0181	4.606e-11	++	60.7	2.543	1	0.1108	824532	398824	NMNAT2	-	-	-	G	A	0.562629	-0.142178	0.0216809	7e-11	0.0230706	7.14937e-10	-	-	G	A	0.5632	-0.0826	0.0291	0.004533	0.0293852	0.00493977
1:197823154_A_C	rs10801626	q31.3	1	197823154	1	24	Yes	1	1	1	1	A	C	0.7008	0.0041	0.6976	0.706	0.1158	0.0197	4.013e-09	++	72.6	3.644	1	0.05626	825059	337596	C1orf53	-	-	-	C	A	0.302358	-0.0862055	0.0235426	0.00058	0.0250516	0.000579312	-	-	C	A	0.294	-0.1635	0.0315	2.168e-07	0.0318088	2.74602e-07
1:205075641_A_G	rs10900448	q32.1	1	205075641	1	254	Yes	0	1	1	0	A	G	0.3973	0.0006	0.3965	0.3977	0.1543	0.0183	3.327e-17	++	0	0.618	1	0.4316	837059	396110	RBBP5	-	-	-	G	A	0.602263	-0.165855	0.0220617	1e-13	0.0234758	1.60679e-12	-	-	G	A	0.6035	-0.1364	0.0289	2.455e-06	0.0291833	2.95519e-06
1:205767885_A_G	rs708727	q32.1	1	205767885	0	254	Yes	0	1	1	0	A	G	0.4013	0.0017	0.4	0.4035	-0.1327	0.0187	1.163e-12	--	57.9	2.375	1	0.1233	809506	381456	SLC41A1	PM20D1,SLC41A1	-	NUCKS1,SLC41A1	G	A	0.599987	0.110698	0.0221051	1.2e-06	0.0235219	2.52428e-06	-	-	G	A	0.5965	0.1703	0.0304	2.147e-08	0.030698	2.89624e-08
1:206670653_C_G	rs11576885	q32.1	1	206670653	1	22	Yes	1	1	1	1	C	G	0.6386	0.0062	0.634	0.6472	-0.1126	0.0192	4.253e-09	--	74.4	3.903	1	0.04819	770887	339225	IKBKE,C1orf147	-	-	-	C	G	0.634046	-0.0852273	0.022236	0.00014	0.0236612	0.000315803	-	-	G	C	0.3528	0.165	0.0324	3.572e-07	0.0327176	4.57907e-07
1:207889838_A_AT	rs148324780	q32.2	1	207889838	0	447	Yes	0	0	0	0	A	AT	0.9332	0.0016	0.9312	0.9345	0.2537	0.0366	4.134e-12	++	0	0.013	1	0.9085	828687	100035	CR1L	-	CR1L	-	A	AT	0.934476	0.256987	0.0435016	1.1e-08	0.0462899	2.82922e-08	-	-	A	AT	0.9312	0.2483	0.0592	2.708e-05	0.0597803	3.27365e-05
1:207993102_A_G	rs7512286	q32.2	1	207993102	1	447	Yes	0	0	0	0	A	G	0.8922	0.0082	0.8824	0.899	-0.6388	0.0291	9.69e-107	--	0	0.008	1	0.9303	837059	155328	CD46	-	-	CD34,C1orf116	A	G	0.899012	-0.636723	0.0356297	3.8e-73	0.0379134	2.69407e-63	-	-	G	A	0.1176	0.6419	0.045	3.266e-46	0.0454411	2.62712e-45
1:208040605_A_T	rs672588	q32.2	1	208040605	0	447	Yes	0	0	0	0	A	T	0.8793	0.0129	0.8634	0.8897	-0.1727	0.0287	1.846e-09	--	23.1	1.3	1	0.2543	835444	158762	CD34	-	-	-	T	A	0.110258	0.199278	0.0347595	1.4e-08	0.0369874	7.13568e-08	-	-	T	A	0.1366	0.1323	0.0452	0.003398	0.045643	0.00374857
1:208121860_C_T	rs11582914	q32.2	1	208121860	0	447	Yes	0	0	0	0	T	C	0.0534	0.0033	0.0509	0.0578	-0.276	0.0415	2.843e-11	--	30.4	1.437	1	0.2306	792292	76631.9	CD34	-	-	-	C	T	0.949095	0.238651	0.0487398	7.1e-07	0.0518638	4.19473e-06	-	-	C	T	0.9422	0.3422	0.0684	5.623e-07	0.0690705	7.25682e-07
1:212050065_A_AT	rs10707051	q32.3	1	212050065	0	132	Yes	0	1	1	0	A	AT	0.5409	0.0086	0.5342	0.5519	0.1133	0.0181	3.897e-10	++	0	0.949	1	0.33	826571	401757	LPGAT1	-	-	-	AT	A	0.465839	-0.12715	0.0216136	3.2e-09	0.0229989	3.22953e-08	-	-	A	AT	0.5519	0.0908	0.0291	0.001827	0.0293852	0.00200165
1:212215907_A_ATAT	rs146642277	q32.3	1	212215907	1	132	Yes	0	1	1	0	A	ATAT	0.0387	0.0011	0.0379	0.0401	-0.3156	0.0471	2.115e-11	--	0	0.095	1	0.7574	818367	57894.3	INTS7,DTL	-	-	-	ATAT	A	0.962148	0.304194	0.0561796	4.5e-08	0.0597805	3.60874e-07	-	-	A	ATAT	0.0401	-0.3342	0.0758	1.052e-05	0.076543	1.26442e-05
1:216734001_A_T	rs17042848	q41	1	216734001	1	331	Yes	0	0	1	0	A	T	0.1846	0.0019	0.1832	0.187	-0.2448	0.0234	1.165e-25	--	0	0.004	1	0.9506	820893	240251	ESRRG	-	-	-	T	A	0.816838	0.245885	0.0278717	6.1e-19	0.0296582	1.12645e-16	-	-	T	A	0.813	0.2429	0.0376	1.094e-10	0.0379686	1.58046e-10
1:217739036_C_T	rs2042525	q41	1	217739036	1	313	Yes	0	0	1	0	T	C	0.7647	0.0032	0.7606	0.7672	-0.2122	0.0213	2.802e-23	--	0	0	1	0.9883	819977	290419	GPATCH2	-	-	-	T	C	0.767242	-0.211952	0.0253881	3.8e-17	0.0270154	4.30863e-15	-	-	C	T	0.2394	0.2126	0.0345	7.137e-10	0.0348382	1.04421e-09
1:218201463_A_G	rs17693328	q41	1	218201463	0	313	Yes	0	0	1	0	A	G	0.7642	0.0044	0.7607	0.7698	-0.1226	0.0212	6.931e-09	--	0	0.197	1	0.6568	834401	295246	SPATA17	-	-	-	A	G	0.760725	-0.115302	0.025227	3.1e-06	0.0268439	1.74481e-05	-	-	G	A	0.2302	0.1347	0.0341	7.887e-05	0.0344342	9.16095e-05
1:222823743_G_T	rs67180937	q41	1	222823743	1	51	Yes	1	1	1	1	T	G	0.2882	0.0183	0.2739	0.3116	0.1276	0.0209	9.732e-10	++	0	0.081	1	0.7763	798437	308922	MIA3	RP11-378J18.8	-	-	T	G	0.273879	0.132209	0.0249114	3.1e-08	0.0265081	6.11684e-07	-	-	G	T	0.6884	-0.12	0.0335	0.0003457	0.0338284	0.000389173
1:227217905_C_T	rs12403775	q42.13	1	227217905	1	145	Yes	0	1	1	0	T	C	0.7397	0.0034	0.737	0.744	-0.1384	0.0203	8.698e-12	--	0	0.132	1	0.7159	837059	318151	CDC42BPA	-	-	CDC42BPA,ADCK3	T	C	0.737015	-0.144256	0.024322	4.1e-09	0.0258809	2.49197e-08	-	-	C	T	0.256	0.1291	0.0323	6.541e-05	0.0326166	7.55462e-05
1:237715400_A_G	rs111660369	q43	1	237715400	0	264	Yes	0	1	1	0	A	G	0.9775	0.0001	0.9775	0.9777	0.4924	0.061	7.148e-16	++	50.2	2.009	1	0.1564	814219	35081.8	RYR2	-	RYR2	RYR2	A	G	0.977458	0.558716	0.07228	5.1e-15	0.0769128	3.75047e-13	-	-	G	A	0.0223	-0.3796	0.0993	0.0001314	0.100273	0.000153306
1:237923053_C_T	rs2253831	q43	1	237923053	1	264	Yes	0	1	1	0	T	C	0.6914	0.0044	0.688	0.6971	-0.1688	0.0196	7.98e-18	--	0	0	1	0.9826	829783	341109	RYR2	-	-	RYR2	C	T	0.31204	0.169181	0.0234061	1.4e-13	0.0249063	1.10062e-11	-	-	C	T	0.3029	0.1683	0.0316	1.016e-07	0.0319097	1.33299e-07
1:26383875_A_G	rs2275947	p36.11	1	26383875	1	231	Yes	0	1	1	0	A	G	0.7785	0.0048	0.7724	0.7823	0.1734	0.0219	2.271e-15	++	0	0.095	1	0.758	816690	275841	TRIM63	-	TRIM63	TRIM63,SLC30A2	A	G	0.782293	0.178695	0.0260952	4.9e-12	0.0277678	1.23203e-10	-	-	G	A	0.2276	-0.1648	0.0352	2.858e-06	0.035545	3.54576e-06
1:28688097_A_G	rs111273182	p35.3	1	28688097	1	245	Yes	0	1	1	0	A	G	0.7005	0.003	0.6982	0.7043	-0.1608	0.0196	2.698e-16	--	0	0.026	1	0.8711	837059	341724	PHACTR4	PHACTR4	PHACTR4	PHACTR4,YTHDF2,GMEB1	A	G	0.698153	-0.163288	0.0233401	5.1e-12	0.0248361	4.87768e-11	-	-	G	A	0.2957	0.1567	0.0318	8.558e-07	0.0321117	1.06171e-06
1:39944249_C_T	rs61779313	p34.3	1	39944249	1	56	Yes	0	1	1	0	T	C	0.7709	0.0027	0.7675	0.773	-0.1308	0.0213	8.748e-10	--	0	0.169	1	0.6809	837059	290194	MACF1	-	MACF1	-	T	C	0.772994	-0.123799	0.0256354	9.5e-07	0.0272785	5.67009e-06	-	-	C	T	0.2325	0.1418	0.0339	2.81e-05	0.0342323	3.43858e-05
1:40481100_A_G	rs11207310	p34.2	1	40481100	0	56	No, not in IC-RHR	0	1	1	0	A	G	0.3992	0.0065	0.3943	0.4079	0.1099	0.0191	8.481e-09	++	58.7	2.42	1	0.1198	818062	369136	CAP1	-	-	RLF,CAP1	G	A	0.605707	-0.132039	0.0223747	3.5e-09	0.0238088	2.92612e-08	-	-	G	A	0.5921	-0.0701	0.0316	0.02663	0.0319097	0.0280332
1:43426591_C_T	rs3738514	p34.2	1	43426591	1	256	Yes	0	1	1	0	T	C	0.2139	0.0011	0.2131	0.2153	-0.1869	0.0221	2.331e-17	--	0	0.259	1	0.6111	810310	272149	SLC2A1	-	-	SLC2A1	C	T	0.786949	0.17823	0.0261934	2.5e-12	0.0278723	1.61049e-10	-	-	C	T	0.7847	0.2014	0.0357	1.725e-08	0.0360499	2.3143e-08
1:45012273_A_C	rs272564	p34.1	1	45012273	1	425	Yes	0	0	1	0	A	C	0.715	0.0012	0.7141	0.7165	-0.3581	0.0203	1.723e-69	--	90.7	10.724	1	0.001058	806717	318401	RNF220	-	-	-	A	C	0.714093	-0.408844	0.0240159	1.1e-67	0.0255552	1.30988e-57	-	-	C	A	0.2835	0.2708	0.0332	3.531e-16	0.0335254	6.61342e-16
1:45770167_C_G	rs11576668	p34.1	1	45770167	0	425	Yes	0	0	1	0	C	G	0.0917	0.0024	0.0884	0.0935	0.2939	0.0319	3.278e-20	++	0	0.823	1	0.3644	830958	129551	ZSWIM5	-	-	MAST2,GPBP1L1,PIK3R3,LRRC41	G	C	0.906503	-0.315621	0.037482	1.7e-17	0.0398844	2.5048e-15	-	-	G	C	0.9116	-0.2553	0.0527	1.254e-06	0.0532166	1.60756e-06
1:46658217_C_T	rs41292143	p34.1	1	46658217	1	77	No, not in IC-RHR	0	1	1	0	T	C	0.0214	0.001	0.0208	0.0229	-0.4267	0.0681	3.812e-10	--	78.9	4.747	1	0.02934	774336	28425.7	TSPAN1,POMGNT1	-	LRRC41	MAST2,GPBP1L1,PIK3R3,LRRC41	C	T	0.979215	0.526432	0.0771497	3.1e-11	0.0820947	1.43154e-10	-	-	C	T	0.9771	0.2057	0.121	0.08919	0.122186	0.0922786
1:51241057_A_C	rs17384696	p32.3	1	51241057	1	179	Yes	1	1	1	1	A	C	0.3168	0.0018	0.3146	0.3182	0.1382	0.0193	7.518e-13	++	0	0.985	1	0.3209	832316	352821	FAF1	-	-	FAF1	C	A	0.681786	-0.153342	0.0230888	2.4e-11	0.0245687	4.33792e-10	-	-	C	A	0.6854	-0.114	0.0308	0.000213	0.0311019	0.00024698
1:54119578_A_G	rs17387330	p32.3	1	54119578	0	213	Yes	0	1	1	0	A	G	0.3117	0.0052	0.305	0.3158	0.1259	0.0195	9.993e-11	++	0	0.077	1	0.782	832316	348180	GLIS1	-	-	-	G	A	0.68419	-0.130119	0.023186	3.1e-08	0.0246721	1.33535e-07	-	-	G	A	0.695	-0.119	0.0314	0.0001503	0.0317078	0.000174716
1:54765727_C_T	rs10888844	p32.3	1	54765727	1	213	Yes	0	1	1	0	T	C	0.6747	0.0007	0.6738	0.6753	-0.1492	0.0195	2.01e-14	--	0	0.979	1	0.3224	805718	344882	SSBP3	-	-	SSBP3	C	T	0.324711	0.164049	0.023118	8.7e-13	0.0245998	2.58042e-11	-	-	C	T	0.3262	0.1241	0.0317	9.242e-05	0.0320107	0.000105828
1:54953955_C_T	rs177264	p32.3	1	54953955	0	213	Yes	0	1	1	0	T	C	0.1084	0.0062	0.0998	0.1128	-0.2215	0.0295	6.192e-14	--	0	0.365	1	0.5455	835082	151271	ACOT11	-	-	ACOT11	T	C	0.112795	-0.234314	0.0341828	1.1e-11	0.0363738	1.18035e-10	-	-	C	T	0.9002	0.1967	0.05	8.432e-05	0.0504901	9.78697e-05
1:56846395_A_C	rs12564524	p32.2	1	56846395	1	63	Yes	1	1	1	1	A	C	0.5258	0.0054	0.5189	0.53	0.1122	0.0182	6.439e-10	++	44.3	1.794	1	0.1805	820678	399001	PPAP2B	-	-	-	A	C	0.530011	0.093182	0.0216507	9.6e-06	0.0230384	5.24047e-05	-	-	C	A	0.4811	-0.1433	0.0292	8.956e-07	0.0294862	1.17446e-06
1:6272137_A_G	rs709208	p36.31	1	6272137	1	372	Yes	0	0	1	0	A	G	0.6645	0.0136	0.6458	0.6744	-0.252	0.0202	1.448e-35	--	1.3	1.013	1	0.3141	816450	325656	RPL22,RNF207,ICMT	-	RNF207	-	A	G	0.674432	-0.23715	0.0235148	2.3e-24	0.025022	2.60051e-21	-	-	G	A	0.3542	0.28	0.0341	2.373e-16	0.0344342	4.24222e-16
1:6565218_C_T	rs4590694	p36.31	1	6565218	0	372	Yes	0	0	1	0	T	C	0.1727	0.0008	0.1716	0.1733	0.151	0.0251	1.723e-09	++	0	0.05	1	0.823	825917	210903	PLEKHG5	-	-	PLEKHG5	C	T	0.826661	-0.155073	0.0291744	2.2e-08	0.0310444	5.87727e-07	-	-	C	T	0.8284	-0.1433	0.0421	0.0006623	0.0425127	0.00074961
1:66988401_C_T	rs12093875	p31.3	1	66988401	1	391	Yes	0	1	1	0	T	C	0.2175	0.0039	0.2144	0.2225	-0.2973	0.022	1.377e-41	--	71.4	3.491	1	0.06169	803649	271424	SGIP1	-	-	-	C	T	0.785558	0.329465	0.0262488	2.7e-35	0.0279312	4.11386e-32	-	-	C	T	0.7775	0.2447	0.0354	5.045e-12	0.035747	7.62989e-12
1:68331048_A_G	rs7544103	p31.3	1	68331048	1	13	Yes	1	1	1	1	A	G	0.3264	0.0051	0.3199	0.3304	-0.111	0.0191	5.743e-09	--	0	0.053	1	0.8183	830784	361945	GNG12	-	-	GNG12	G	A	0.669569	0.107589	0.0228147	4.5e-06	0.024277	9.34842e-06	-	-	G	A	0.6801	0.1166	0.0305	0.0001321	0.030799	0.000153189
1:72674434_G_T	rs1858601	p31.1	1	72674434	1	147	Yes	0	1	1	0	T	G	0.1955	0.0051	0.1888	0.1993	-0.1558	0.0228	8.046e-12	--	61.2	2.58	1	0.1082	826217	255265	NEGR1	-	-	-	G	T	0.800669	0.1279	0.026944	2.2e-06	0.028671	8.15957e-06	-	-	G	T	0.8112	0.2038	0.0372	4.286e-08	0.0375646	5.78521e-08
1:80452798_G_T	rs1340678	p31.1	1	80452798	1	282	Yes	0	1	1	0	T	G	0.2098	0.0147	0.1979	0.2281	0.208	0.0228	7.885e-20	++	38.8	1.633	1	0.2013	826452	258521	ELTD1	-	-	-	G	T	0.802067	-0.231441	0.0275059	5e-17	0.0292689	2.62821e-15	-	-	G	T	0.7719	-0.1717	0.0361	1.98e-06	0.0364539	2.47638e-06
1:80460168_C_T	rs12085038	p31.1	1	80460168	0	282	Yes	0	1	1	0	T	C	0.2752	0.0069	0.2696	0.2838	0.123	0.0201	8.915e-10	++	39	1.64	1	0.2003	825481	324685	ELTD1	-	-	-	C	T	0.730415	-0.143735	0.0242255	7.3e-10	0.0257783	2.46361e-08	-	-	C	T	0.7162	-0.0911	0.0317	0.004084	0.0320107	0.00442831
1:83891090_A_C	rs3855035	p31.1	1	83891090	1	71	Yes	1	1	1	1	A	C	0.4941	0.0029	0.49	0.4962	-0.1158	0.0186	4.536e-10	--	0	0.423	1	0.5154	829305	383707	TTLL7	-	-	-	C	A	0.503809	0.107228	0.0214454	4.4e-07	0.02282	2.61607e-06	-	-	C	A	0.51	0.1328	0.0317	2.841e-05	0.0320107	3.345e-05
1:87893268_A_G	rs10782600	p22.3	1	87893268	1	381	Yes	0	0	1	0	A	G	0.5763	0.0013	0.5746	0.5773	0.2319	0.0185	3.732e-36	++	53.9	2.169	1	0.1408	837059	390893	LMO4	-	-	-	A	G	0.577347	0.253417	0.0221271	3.3e-30	0.0235454	5.15063e-27	-	-	G	A	0.4254	-0.1975	0.0295	2.271e-11	0.0297892	3.35848e-11
1:88029611_A_G	rs61773083	p22.3	1	88029611	0	381	Yes	0	0	1	0	A	G	0.7529	0.0025	0.751	0.7561	0.1721	0.0211	3.233e-16	++	22.4	1.288	1	0.2563	837059	295872	LMO4	-	-	-	A	G	0.75101	0.190267	0.0248782	4.4e-15	0.0264728	6.61012e-13	-	-	G	A	0.2439	-0.1406	0.0345	4.728e-05	0.0348382	5.44157e-05
1:88405184_A_C	rs1155338	p22.3	1	88405184	0	381	Yes	0	0	1	0	A	C	0.158	0.0023	0.1562	0.161	-0.1813	0.0248	2.632e-13	--	73.4	3.757	1	0.05258	837059	214544	LMO4	-	-	-	C	A	0.843762	0.218679	0.0295182	1.7e-12	0.0314102	3.35383e-12	-	-	C	A	0.839	0.1195	0.04	0.002795	0.0403921	0.00309139
1:94055890_C_G	rs236321	p22.1	1	94055890	1	130	Yes	0	1	1	0	C	G	0.2554	0.0034	0.2527	0.2598	-0.1411	0.0211	2.351e-11	--	0	0.957	1	0.328	820779	300408	BCAR3	-	-	BCAR3	G	C	0.747271	0.157143	0.0251225	2.8e-10	0.0267327	4.14512e-09	-	-	G	C	0.7402	0.1145	0.0341	0.0007737	0.0344342	0.000883621
1:95511347_G_T	rs61774262	p21.3	1	95511347	1	1	Yes	1	1	1	1	T	G	0.5789	0.0018	0.5774	0.5812	-0.1051	0.0183	8.792e-09	--	0	0.496	1	0.4815	835444	392780	ALG14	-	-	-	T	G	0.577429	-0.0949537	0.021878	1.3e-05	0.0232803	4.5285e-05	-	-	G	T	0.4188	0.1214	0.0292	3.194e-05	0.0294862	3.8354e-05
10:10059819_C_T	rs12763433	p14	10	10059819	1	62	Yes	1	1	1	1	T	C	0.4508	0.0106	0.4373	0.4592	0.112	0.0181	6.583e-10	++	0	0.083	1	0.7735	837061	403898	CELF2	-	-	-	C	T	0.540807	-0.116136	0.0217116	2e-08	0.0231032	4.98652e-07	-	-	C	T	0.5627	-0.1054	0.029	0.0002779	0.0292843	0.000319193
10:101529815_C_CT	rs146441853	q24.2	10	101529815	1	160	No, not in IC-RHR	0	1	1	0	CT	C	0.5638	0.0019	0.5636	0.5852	-0.1614	0.0232	3.644e-12	-+	51.5	2.064	1	0.1508	489754	235701	ABCC2	-	-	-	CT	C	0.563597	-0.164305	0.0219029	1.6e-13	0.0233068	1.79351e-12	-	-	C	CT	0.4148	-0.2168	0.2617	0.4074	0.264265	0.411995
10:102317565_C_CTA	rs201325761	q24.31	10	102317565	0	296	Yes	0	1	1	0	CTA	C	0.7948	0.0079	0.7889	0.8053	0.1451	0.0227	1.544e-10	++	0	0.59	1	0.4423	832964	257222	HIF1AN	-	SEC31B	-	CTA	C	0.788856	0.132026	0.0266325	9.6e-07	0.0283395	3.18179e-06	-	-	C	CTA	0.1947	-0.1683	0.0374	6.855e-06	0.0377666	8.33788e-06
10:102552663_A_G	rs11190709	q24.31	10	102552663	1	296	Yes	0	1	1	0	A	G	0.8915	0.0006	0.8908	0.892	0.2788	0.029	7.425e-22	++	8.8	1.096	1	0.2951	830275	155755	PAX2	-	-	-	G	A	0.107998	-0.302828	0.0347772	1.4e-19	0.0370063	2.76512e-16	-	-	G	A	0.1092	-0.2404	0.0463	2.074e-07	0.0467538	2.72083e-07
10:104957629_A_T	rs12414028	q24.33	10	104957629	0	243	Yes	0	1	1	0	A	T	0.0956	0.0163	0.0813	0.1143	-0.2244	0.0317	1.501e-12	--	0	0.168	1	0.6822	836927	130709	NT5C2	NT5C2	-	C10orf26,-	T	A	0.918675	0.235717	0.0395466	8.9e-09	0.0420814	2.12558e-08	-	-	T	A	0.8857	0.2095	0.0478	1.158e-05	0.0482685	1.42287e-05
10:105615462_C_CG	rs76220958	q24.33	10	105615462	1	243	Yes	0	1	1	0	CG	C	0.3597	0.0005	0.359	0.3601	-0.1548	0.0191	5.52e-16	--	0	0.033	1	0.8549	770031	344331	SH3PXD2A	-	-	SH3PXD2A	C	CG	0.639913	0.15222	0.0224807	4e-11	0.0239216	1.97488e-10	-	-	C	CG	0.641	0.1595	0.0315	3.988e-07	0.0318088	5.32153e-07
10:112459906_A_G	rs10787270	q25.2	10	112459906	1	306	Yes	0	1	1	0	A	G	0.5547	0.006	0.5472	0.5596	0.1784	0.0182	1.41e-22	++	0	0.986	1	0.3206	835446	398381	RBM20	-	-	RBM20	G	A	0.440433	-0.163863	0.021967	2.1e-14	0.023375	2.38005e-12	-	-	G	A	0.4528	-0.201	0.0289	3.364e-12	0.0291833	5.67789e-12
10:112576559_C_G	rs12573386	q25.2	10	112576559	0	306	Yes	0	1	1	0	C	G	0.6252	0.0021	0.6237	0.628	0.1268	0.0191	3.053e-11	++	52.9	2.123	1	0.1451	835446	364159	RBM20	-	-	RBM20	C	G	0.623678	0.147633	0.0224143	5.3e-11	0.023851	6.02357e-10	-	-	G	C	0.372	-0.0897	0.0315	0.004403	0.0318088	0.0048027
10:115438204_A_C	rs12415607	q25.3	10	115438204	1	200	Yes	0	1	1	0	A	C	0.2248	0.0013	0.2238	0.2265	0.1601	0.0216	1.246e-13	++	9.8	1.108	1	0.2924	816746	282956	CASP7	-	-	-	C	A	0.776221	-0.142392	0.0257405	2.1e-08	0.0273904	2.00776e-07	-	-	C	A	0.7735	-0.1893	0.0348	5.483e-08	0.0351411	7.17019e-08
10:115780121_C_T	rs2782978	q25.3	10	115780121	0	200	Yes	0	1	1	0	T	C	0.3947	0.0056	0.3876	0.3992	0.1182	0.0186	1.913e-10	++	0	0.001	1	0.9785	834255	382502	ADRB1	-	-	ADRB1	C	T	0.600812	-0.118628	0.0222634	1.5e-07	0.0236904	5.51613e-07	-	-	C	T	0.6124	-0.1176	0.0296	7.156e-05	0.0298901	8.3402e-05
10:121429633_C_T	rs2234962	q26.11	10	121429633	1	78	Yes	0	1	1	0	T	C	0.789	0.0007	0.7881	0.7895	0.1405	0.0224	3.661e-10	++	48.7	1.949	1	0.1627	803177	264073	BAG3	-	BAG3	BAG3	T	C	0.789542	0.164009	0.0263595	1.7e-10	0.028049	4.99843e-09	-	-	C	T	0.2119	-0.0989	0.0369	0.007409	0.0372617	0.00794966
10:123025225_A_G	rs7915008	q26.13	10	123025225	1	93	Yes	1	1	1	1	A	G	0.2495	0.0073	0.2436	0.2585	-0.1321	0.0207	1.703e-10	--	2.1	1.021	1	0.3123	835446	310052	FGFR2	-	-	-	A	G	0.243632	-0.149003	0.0250247	4.2e-09	0.0266287	2.19881e-08	-	-	G	A	0.7415	0.1063	0.0325	0.001081	0.0328186	0.00119941
10:18641481_A_C	rs77141557	p12.33	10	18641481	1	287	Yes	0	1	1	0	A	C	0.1234	0.0006	0.1226	0.1239	-0.2536	0.0274	1.962e-20	--	25.6	1.345	1	0.2462	836833	177372	CACNB2	-	-	CACNB2	C	A	0.876081	0.228466	0.0327892	6.9e-13	0.0348909	5.83049e-11	-	-	C	A	0.8774	0.2937	0.0437	1.777e-11	0.0441283	2.82173e-11
10:29265018_A_T	rs788045	p12.1	10	29265018	0	367	Yes	0	1	1	0	A	T	0.2413	0.0023	0.2395	0.2441	0.1701	0.0212	1.143e-15	++	0	0.021	1	0.8836	837061	295273	C10orf126	-	-	-	T	A	0.760539	-0.167615	0.0254861	8.3e-12	0.0271197	6.38693e-10	-	-	T	A	0.7559	-0.174	0.0338	2.569e-07	0.0341313	3.43335e-07
10:29820758_C_T	rs17695155	p11.23	10	29820758	1	367	Yes	0	1	1	0	T	C	0.6055	0.0021	0.6038	0.6082	-0.2214	0.0185	5.051e-33	--	1.6	1.016	1	0.3135	835446	385764	SVIL	-	-	SVIL	T	C	0.603774	-0.236001	0.0220786	3.9e-28	0.0234937	9.63846e-24	-	-	C	T	0.3918	0.1976	0.0297	2.673e-11	0.0299911	4.43941e-11
10:30166035_A_C	rs7078837	p11.23	10	30166035	0	367	Yes	0	1	1	0	A	C	0.5862	0.0054	0.5795	0.5905	-0.152	0.0181	5.273e-17	--	0	0	1	0.9928	835446	401051	KIAA1462	SVIL	-	SVIL	C	A	0.40947	0.152134	0.0218545	2.7e-12	0.0232553	6.07375e-11	-	-	C	A	0.4205	0.1518	0.0287	1.215e-07	0.0289813	1.62452e-07
10:43465694_A_C	rs61845266	q11.21	10	43465694	1	134	Yes	0	1	1	0	A	C	0.9273	0.0025	0.9254	0.9308	-0.2371	0.0353	1.854e-11	--	0	0.794	1	0.3728	767088	100005	RET	-	-	-	A	C	0.925448	-0.259937	0.0409672	3.4e-11	0.043593	2.47935e-09	-	-	C	A	0.0692	0.1937	0.0596	0.001162	0.0601842	0.00128884
10:50507975_A_C	rs35326339	q11.23	10	50507975	1	204	Yes	0	1	1	0	A	C	0.461	0.0048	0.455	0.4649	0.1357	0.018	4.774e-14	++	0	0.959	1	0.3274	833728	407122	C10orf71	DRGX	C10orf71	C10orf71	C	A	0.535129	-0.121632	0.0216306	3.2e-09	0.023017	1.26094e-07	-	-	C	A	0.545	-0.1578	0.0286	3.3e-08	0.0288803	4.65719e-08
10:63205765_G_GA	rs143216658	q21.2	10	63205765	1	301	Yes	0	1	1	0	G	GA	0.8264	0.0046	0.8208	0.8301	-0.2297	0.0237	3.335e-22	--	50.2	2.01	1	0.1563	832964	232876	TMEM26	TMEM26	-	-	G	GA	0.830116	-0.256907	0.0286661	3.4e-19	0.0305035	3.69417e-17	-	-	G	GA	0.8208	-0.1882	0.0373	4.43e-07	0.0376656	5.83499e-07
10:69868675_A_G	rs10823138	q21.3	10	69868675	0	176	Yes	0	1	1	0	A	G	0.0953	0.0131	0.0844	0.1109	-0.1902	0.032	2.693e-09	--	0	0.337	1	0.5618	837061	128981	MYPN	-	-	-	G	A	0.915623	0.174629	0.03918	8.5e-06	0.0416913	2.80653e-05	-	-	G	A	0.8891	0.2123	0.0493	1.643e-05	0.0497832	2.00361e-05
10:69964003_C_G	rs143348765	q21.3	10	69964003	0	176	Yes	0	1	1	0	C	G	0.9924	0.0003	0.9919	0.9926	-0.7706	0.1182	7.089e-11	--	0	0.08	1	0.7771	648316	8989.87	MYPN	-	-	-	C	G	0.9926	-0.788649	0.126183	1.3e-10	0.134271	4.26509e-09	-	-	G	C	0.0081	0.7085	0.2469	0.00411	0.24932	0.00448697
10:70363393_C_T	rs1954278	q21.3	10	70363393	1	176	Yes	0	1	1	0	T	C	0.614	0.0041	0.6108	0.6193	0.1317	0.0186	1.343e-12	++	41.4	1.706	1	0.1915	835446	382204	TET1	-	-	TET1	C	T	0.389181	-0.15046	0.0220605	1.1e-12	0.0234745	1.45986e-10	-	-	C	T	0.3807	-0.1003	0.0301	0.0008645	0.030395	0.00096726
10:75420114_A_C	rs6480708	q22.2	10	75420114	1	166	Yes	0	1	1	0	A	C	0.1791	0.0194	0.163	0.2025	-0.1703	0.0243	2.327e-12	--	0	0.075	1	0.7839	834915	229300	SYNPO2L	-	SYNPO2L	SYNPO2L,MYOZ1,KIAA0913,CAMK2G	C	A	0.837031	0.175842	0.0296846	1.1e-09	0.0315873	2.59364e-08	-	-	C	A	0.7975	0.1623	0.0376	1.552e-05	0.0379686	1.91489e-05
10:92715993_A_ATG	rs368764143	q23.31	10	92715993	1	16	No, not in IC-RHR	0	1	1	0	A	ATG	0.4306	0.0008	0.4305	0.4397	0.1344	0.023	5.266e-09	++	55.6	2.25	1	0.1336	489754	239451	ANKRD1	-	-	-	A	ATG	0.43048	0.131281	0.021711	7.9e-10	0.0231026	1.32721e-08	-	-	A	ATG	0.4397	0.5221	0.257	0.04221	0.259519	0.0442412
10:94056095_C_T	rs11186904	q23.32	10	94056095	1	2	Yes	1	1	1	1	T	C	0.4638	0.0035	0.4611	0.4683	-0.1081	0.0188	8.224e-09	--	0	0.331	1	0.565	835446	382456	CPEB3,MARCH5	-	-	MARCH5,CPEB3	T	C	0.461134	-0.0998987	0.0221348	8.6e-06	0.0235535	2.22185e-05	-	-	C	T	0.5317	0.1223	0.0307	6.633e-05	0.0310009	7.97853e-05
11:102054822_A_AAAAAG	rs200525553	q22.1	11	102054822	1	163	No, not in IC-RHR	0	1	1	0	A	AAAAAG	0.3239	0.0071	0.3146	0.3294	0.1373	0.0197	2.788e-12	++	79.1	4.789	1	0.02864	770030	324163	YAP1	-	-	YAP1	AAAAAG	A	0.670628	-0.170097	0.0232198	2.9e-13	0.0247081	5.80877e-12	-	-	A	AAAAAG	0.3146	0.0809	0.0321	0.01171	0.0324146	0.0125679
11:111743232_C_T	rs7112886	q23.1	11	111743232	1	216	Yes	0	1	1	0	T	C	0.7153	0.002	0.7137	0.7179	0.1528	0.0199	1.737e-14	++	0	0.472	1	0.4919	822824	330584	ALG9,FDXACB1,C11orf1	C11orf1,CRYAB	CRYAB	SIK2,CRYAB,DIXDC1	T	C	0.713743	0.142151	0.0237468	2.4e-09	0.0252689	1.84931e-08	-	-	C	T	0.2821	-0.1704	0.0321	1.067e-07	0.0324146	1.46517e-07
11:112646162_A_G	rs72995788	q23.2	11	112646162	0	216	Yes	0	1	1	0	A	G	0.195	0.0025	0.1915	0.1968	-0.1494	0.0233	1.323e-10	--	0	0.063	1	0.8024	837060	244735	NCAM1	-	-	NCAM1	G	A	0.803176	0.153659	0.0269825	5.9e-09	0.028712	8.71122e-08	-	-	G	A	0.8085	0.1414	0.0393	0.0003176	0.0396852	0.000366585
11:12223034_C_T	rs74964634	p15.3	11	12223034	1	102	Yes	0	1	1	0	T	C	0.0741	0.0076	0.0677	0.0833	0.2313	0.0359	1.182e-10	++	67	3.035	1	0.0815	826361	103407	MICAL2	-	-	-	C	T	0.93226	-0.282955	0.0437721	1.2e-11	0.0465777	1.24064e-09	-	-	C	T	0.9167	-0.1556	0.0558	0.005279	0.0563469	0.00575431
11:123022720_C_T	rs34809680	q24.1	11	123022720	0	112	No, not in IC-RHR	0	1	1	0	T	C	0.213	0.0021	0.2104	0.2147	-0.1314	0.0219	1.899e-09	--	81.4	5.364	1	0.02055	834402	273973	CLMP	-	-	-	C	T	0.785313	0.17151	0.0262222	3.3e-11	0.0279029	7.91288e-10	-	-	C	T	0.7896	0.0674	0.0349	0.05358	0.0352421	0.0558139
11:123047826_C_G	rs7928609	q24.1	11	123047826	1	112	Yes	0	1	1	0	C	G	0.551	0.0023	0.5492	0.554	-0.1186	0.0183	8.843e-11	--	0	0.016	1	0.9006	814296	396480	CLMP	-	-	-	G	C	0.450778	0.116787	0.021759	1.6e-07	0.0231537	4.55907e-07	-	-	G	C	0.446	0.1215	0.0295	3.786e-05	0.0297892	4.5295e-05
11:128764570_A_G	rs76097649	q24.3	11	128764570	1	395	Yes	0	0	1	0	A	G	0.0869	0.0024	0.0833	0.0885	-0.4714	0.0334	4.21e-45	--	39.6	1.654	1	0.1984	836192	120587	KCNJ5,C11orf45	-	-	KCNJ5,ARHGAP32	G	A	0.911541	0.4427	0.0377842	9.6e-33	0.040206	3.39012e-28	-	-	G	A	0.9167	0.5359	0.0597	2.827e-19	0.0602852	6.14311e-19
11:128782012_C_G	rs7102584	q24.3	11	128782012	0	395	Yes	0	0	1	0	C	G	0.0204	0.0034	0.0175	0.0245	0.6945	0.0682	2.512e-24	++	0	0.165	1	0.685	791187	29192.4	KCNJ5,C11orf45	-	KCNJ5	KCNJ5,ARHGAP32	C	G	0.0175365	0.717371	0.0831898	5.7e-18	0.0885219	5.32338e-16	-	-	G	C	0.9755	-0.661	0.1061	4.629e-10	0.10714	6.85069e-10
11:14048480_C_T	rs10832164	p15.2	11	14048480	1	276	Yes	0	1	1	0	T	C	0.5101	0.0032	0.506	0.5126	-0.1602	0.0182	1.219e-18	--	0	0.348	1	0.5552	803893	398536	RRAS2	SPON1	-	-	C	T	0.487404	0.168488	0.0215679	2.4e-15	0.0229503	2.11332e-13	-	-	C	T	0.494	0.1463	0.0295	7.206e-07	0.0297892	9.05286e-07
11:2197112_A_G	rs7482891	p15.5	11	2197112	1	44	Yes	0	1	1	0	A	G	0.3729	0.0006	0.372	0.3733	0.1151	0.0191	1.738e-09	++	0	0.051	1	0.8209	806927	363208	TH	-	-	-	A	G	0.373326	0.11826	0.0223139	2.2e-07	0.0237441	6.33875e-07	-	-	G	A	0.628	-0.1092	0.0319	0.000632	0.0322127	0.000699005
11:30568643_A_G	rs509240	p14.1	11	30568643	1	23	No, not in IC-RHR	0	1	1	0	A	G	0.6682	0.0059	0.6637	0.6759	0.114	0.0194	4.132e-09	++	83	5.875	1	0.01535	829511	352750	MPPED2	-	-	MPPED2	A	G	0.663696	0.149835	0.0229129	3.9e-11	0.0243815	7.97459e-10	-	-	G	A	0.3241	-0.0523	0.0317	0.09946	0.0320107	0.102295
11:32367735_A_G	rs11031734	p13	11	32367735	1	233	Yes	0	1	1	0	A	G	0.235	0.0045	0.2291	0.2385	-0.1722	0.0216	1.696e-15	--	0	0.328	1	0.5669	811899	283041	WT1	-	-	-	G	A	0.761536	0.181606	0.0255274	2.8e-13	0.0271636	2.29921e-11	-	-	G	A	0.7709	0.1559	0.0354	1.094e-05	0.035747	1.29347e-05
11:43787674_C_T	rs114693078	p11.2	11	43787674	1	203	Yes	0	1	1	0	T	C	0.1439	0.0039	0.1407	0.1488	0.192	0.0257	8.156e-14	++	48	1.924	1	0.1654	834402	200538	HSD17B12	-	-	-	C	T	0.859264	-0.220545	0.0309338	8.9e-13	0.0329165	2.08235e-11	-	-	C	T	0.8512	-0.1474	0.0408	0.0002993	0.0411999	0.000346662
11:44975552_C_T	rs34206025	p11.2	11	44975552	1	339	Yes	0	0	1	0	T	C	0.3322	0.0049	0.3283	0.3385	0.2079	0.0193	4.588e-27	++	73.3	3.738	1	0.05318	837060	355236	TP53I11	-	-	TP53I11	C	T	0.671664	-0.23706	0.0230248	1e-25	0.0245006	3.82526e-22	-	-	C	T	0.6615	-0.1602	0.031	2.459e-07	0.0313039	3.09481e-07
11:61586328_C_CT	rs35473591	q12.2	11	61586328	1	437	Yes	0	0	0	0	CT	C	0.3358	0	0.3357	0.3358	0.3547	0.0191	7.652e-77	++	0	0.723	1	0.3951	832963	365460	FADS2,FADS1	FADS1	-	FADS3,C11orf9	C	CT	0.664265	-0.341797	0.0229116	2.2e-52	0.0243801	1.1847e-44	-	-	C	CT	0.6642	-0.3752	0.0305	9.195e-35	0.030799	3.86567e-34
11:62336776_A_G	rs7928833	q12.3	11	62336776	0	437	Yes	0	0	0	0	A	G	0.6437	0.0078	0.6376	0.6537	0.1402	0.0189	1.107e-13	++	0	0.002	1	0.9672	831637	372834	EEF1G,MIR3654,TUT1	EEF1G,EML3,ROM1	EML3	-	A	G	0.637613	0.139598	0.022449	1.7e-09	0.0238879	5.09981e-09	-	-	G	A	0.3463	-0.1412	0.0305	3.557e-06	0.030799	4.54921e-06
11:65337251_A_T	rs1346	q13.1	11	65337251	1	241	Yes	0	1	1	0	A	T	0.8078	0.0052	0.8038	0.8146	0.1856	0.0229	6.141e-16	++	77.7	4.48	1	0.0343	833733	249879	SSSCA1,FAM89B,EHBP1L1	-	-	NEAT1,LTBP3,MALAT1,SCYL1	A	T	0.803824	0.222556	0.0271086	4.9e-18	0.0288461	1.20721e-14	-	-	T	A	0.1854	-0.1218	0.0375	0.001158	0.0378676	0.00129777
11:76131866_C_G	rs7930925	q13.5	11	76131866	1	25	Yes	1	1	1	1	C	G	0.6852	0.001	0.6844	0.6864	0.114	0.0193	3.611e-09	++	0	0.069	1	0.7929	829481	353656	C11orf30	-	-	-	C	G	0.684414	0.118003	0.0232017	4.2e-07	0.0246888	1.75635e-06	-	-	G	C	0.3136	-0.1076	0.0307	0.0004496	0.0310009	0.000518785
11:78191740_T_TG	rs11347548	q14.1	11	78191740	1	133	No, not in IC-RHR	0	1	1	0	T	TG	0.1904	0.0043	0.1702	0.1913	0.1952	0.0291	2.063e-11	++	0	0.12	1	0.7291	552687	167304	NARS2	-	-	-	TG	T	0.808742	-0.197301	0.0279747	5.8e-12	0.0297678	3.40245e-11	-	-	T	TG	0.1702	0.1475	0.1393	0.2896	0.140665	0.294368
11:89224718_G_T	rs2289123	q14.3	11	89224718	1	64	No, not in IC-RHR	0	1	1	0	T	G	0.7555	0.0148	0.7363	0.7668	-0.1361	0.022	6.24e-10	--	70.8	3.427	1	0.06416	826818	279987	NOX4	-	-	-	G	T	0.233182	0.16744	0.0261009	4.5e-10	0.0277739	1.65294e-09	-	-	G	T	0.2637	0.0832	0.0357	0.0197	0.0360499	0.0210041
11:92708710_C_G	rs10830963	q14.3	11	92708710	1	9	Yes	1	1	1	1	C	G	0.7264	0.0005	0.7261	0.7271	-0.1197	0.0207	6.889e-09	--	0	0.596	1	0.44	819218	309177	MTNR1B	-	-	MTNR1B	C	G	0.726081	-0.107982	0.0241281	1.2e-05	0.0256746	2.60173e-05	-	-	G	C	0.2729	0.1414	0.0345	4.221e-05	0.0348382	4.93325e-05
11:9388001_A_AC	rs113086523	p15.4	11	9388001	1	40	Yes	0	1	1	0	A	AC	0.4239	0.0008	0.4229	0.4245	-0.1095	0.0183	2.074e-09	--	0	0.035	1	0.8514	832963	394264	IPO7	-	-	ZNF143,IPO7	AC	A	0.57549	0.106852	0.0218512	8.2e-07	0.0232518	4.31848e-06	-	-	A	AC	0.4229	-0.1139	0.0293	0.0001023	0.0295872	0.000118293
11:96075065_C_T	rs117686537	q21	11	96075065	1	82	Yes	1	1	1	1	T	C	0.0241	0.0014	0.0231	0.026	-0.3875	0.0613	2.539e-10	--	34.8	1.535	1	0.2154	751469	33262.1	MAML2	-	-	MAML2	C	T	0.976881	0.331566	0.0715032	4.5e-07	0.0760863	1.31398e-05	-	-	C	T	0.974	0.4905	0.1023	1.631e-06	0.103303	2.05255e-06
12:102599859_A_G	rs10507145	q23.2	12	102599859	1	50	Yes	1	1	1	1	A	G	0.8261	0.0002	0.8259	0.8264	0.1448	0.0238	1.147e-09	++	0	0.486	1	0.4856	814848	233383	PARPBP,PMCH	-	-	-	A	G	0.825944	0.131953	0.0283204	7e-06	0.0301356	1.19423e-05	-	-	G	A	0.1736	-0.1662	0.0384	1.508e-05	0.0387764	1.81827e-05
12:107149422_A_T	rs2067615	q23.3	12	107149422	1	247	Yes	0	1	0	0	A	T	0.4755	0.0011	0.4747	0.4769	0.1479	0.018	2.219e-16	++	2.5	1.025	1	0.3113	829052	406734	RFX4	-	-	RIC8B	A	T	0.47466	0.133435	0.0216172	7e-10	0.0230028	6.59905e-09	-	-	T	A	0.5231	-0.1709	0.0287	2.758e-09	0.0289813	3.70388e-09
12:110705800_A_G	rs1986123	q24.11	12	110705800	1	333	Yes	0	1	1	0	A	G	0.6398	0.0049	0.636	0.6461	0.1969	0.0187	8.051e-26	++	0	0.11	1	0.7407	831594	377823	ATP2A2	-	-	ATP2A2,ANKRD13A,GIT2,PPP1CC	A	G	0.635955	0.201759	0.0224114	1.2e-19	0.0238479	2.66806e-17	-	-	G	A	0.3539	-0.189	0.03	2.874e-10	0.0302941	4.40808e-10
12:114837349_A_C	rs77357563	q24.21	12	114837349	1	408	Yes	0	1	1	0	A	C	0.0053	0.0012	0.0048	0.008	2.2086	0.1518	6.1e-48	++	82.5	5.704	1	0.01693	615901	6110.27	TBX5	-	TBX5	-	C	A	0.99525	-2.36915	0.156043	1.5e-52	0.166045	3.45651e-46	-	-	C	A	0.992	-1.3898	0.3713	0.0001815	0.374939	0.000209951
12:114869757_G_T	rs2077196	q24.21	12	114869757	0	408	Yes	0	1	1	0	T	G	0.4175	0.0177	0.3943	0.431	0.1496	0.0185	6.73e-16	++	0	0.176	1	0.6747	836281	388592	TBX5	-	-	TBX5,-	G	T	0.569015	-0.15551	0.0219097	9.4e-13	0.023314	2.55394e-11	-	-	G	T	0.6057	-0.1394	0.0302	3.875e-06	0.030496	4.85198e-06
12:116231689_A_G	rs2681469	q24.21	12	116231689	1	183	Yes	0	1	1	0	A	G	0.5219	0.0209	0.4948	0.538	-0.1313	0.0182	5.204e-13	--	72.8	3.68	1	0.05506	829304	398935	MED13L	-	-	-	G	A	0.46199	0.158143	0.02157	2.1e-12	0.0229525	5.57933e-12	-	-	G	A	0.5052	0.086	0.0295	0.003577	0.0297892	0.00388988
12:123077485_A_T	rs10744287	q24.31	12	123077485	0	96	Yes	0	1	1	0	A	T	0.6278	0.0034	0.6235	0.6305	0.1148	0.0185	4.984e-10	++	26.7	1.364	1	0.2429	832637	386043	KNTC1	-	-	CLIP1,HCAR1,RSRC2,ZCCHC8	T	A	0.369468	-0.13217	0.0222582	1.7e-09	0.0236849	2.40023e-08	-	-	T	A	0.3765	-0.088	0.0292	0.002618	0.0294862	0.00284093
12:123885930_C_T	rs370591186	q24.31	12	123885930	1	96	Yes	0	1	1	0	T	C	0.0283	0.0034	0.0274	0.0406	0.4444	0.0695	1.638e-10	++	56.9	2.319	1	0.1278	552351	29527.2	SETD8	-	-	-	C	T	0.972606	-0.414849	0.0678306	1.6e-09	0.0721783	9.05396e-09	-	-	C	T	0.9594	-0.8239	0.2562	0.001299	0.258711	0.00144939
12:20000865_A_G	rs79863363	p12.3	12	20000865	0	360	No, not in IC-RHR	0	0	1	0	A	G	0.011	0.001	0.0087	0.0115	0.6698	0.0979	7.953e-12	++	0	0.103	1	0.7482	718712	13925.5	AEBP2	-	-	AEBP2	G	A	0.988531	-0.683694	0.100657	2.5e-11	0.107109	1.73449e-10	-	-	G	A	0.9913	-0.5988	0.2394	0.01239	0.241747	0.0132502
12:20470009_A_G	rs2044315	p12.2	12	20470009	1	360	Yes	0	0	1	0	A	G	0.759	0.0013	0.7573	0.7601	0.2478	0.021	4.786e-32	++	42.6	1.743	1	0.1868	829257	297427	PDE3A	-	-	PDE3A	A	G	0.760056	0.269675	0.025178	5.5e-27	0.0267918	7.84256e-24	-	-	G	A	0.2427	-0.2126	0.0336	2.459e-10	0.0339293	3.7053e-10
12:2178165_A_G	rs11062103	p13.33	12	2178165	1	438	Yes	0	0	1	0	A	G	0.8224	0.0022	0.8196	0.8242	0.4406	0.0236	6.651e-78	++	92	12.452	1	0.0004176	836830	238405	CACNA1C	-	-	CACNA1C	A	G	0.82418	0.50677	0.0283187	9.2e-72	0.0301338	1.82212e-63	-	-	G	A	0.1804	-0.336	0.0375	3.369e-19	0.0378676	7.11841e-19
12:24739636_A_T	rs12230165	p12.1	12	24739636	0	465	Yes	0	0	0	0	A	T	0.9806	0.002	0.9782	0.9822	-0.3962	0.0665	2.525e-09	--	0	0.387	1	0.5336	807393	30044.7	BCAT1	-	-	-	A	T	0.982192	-0.430737	0.081351	1.9e-07	0.0865653	6.49571e-07	-	-	T	A	0.0218	0.3466	0.1028	0.000749	0.103808	0.000841206
12:24758480_A_G	rs4963772	p12.1	12	24758480	1	465	Yes	0	0	0	0	A	G	0.1512	0.0002	0.151	0.1514	-0.6621	0.0251	5.47e-153	--	83.6	6.096	1	0.01355	837058	207866	BCAT1	-	-	-	G	A	0.848983	0.710846	0.0300261	3.3e-127	0.0319506	1.17282e-109	-	-	G	A	0.8486	0.5831	0.0403	1.996e-47	0.040695	1.45151e-46
12:26348304_C_T	rs58747679	p12.1	12	26348304	1	338	Yes	0	1	1	0	T	C	0.7061	0.0004	0.7056	0.7063	-0.2103	0.0196	9.757e-27	--	0	0.405	1	0.5245	837058	342878	SSPN	-	-	SSPN	T	C	0.706343	-0.220316	0.0236654	1.1e-20	0.0251823	2.1552e-18	-	-	C	T	0.2944	0.1947	0.0311	3.678e-10	0.0314048	5.65777e-10
12:27957292_C_CTCT	rs150733182	p11.22	12	27957292	1	255	Yes	0	0	1	0	CTCT	C	0.8295	0.0005	0.8289	0.8299	0.2114	0.025	2.865e-17	++	0	0.452	1	0.5013	832961	211740	KLHL42	-	-	-	CTCT	C	0.829852	0.22341	0.0289162	1.8e-15	0.0307696	3.8499e-13	-	-	C	CTCT	0.1711	-0.1879	0.0425	9.671e-06	0.0429166	1.1963e-05
12:33303342_C_T	rs4931690	p11.1	12	33303342	0	453	Yes	0	0	0	0	T	C	0.3704	0.0059	0.3657	0.3777	-0.1537	0.02	1.601e-14	--	0	0.217	1	0.6416	834457	338360	SYT10	-	-	-	C	T	0.634283	0.16117	0.0241434	1.7e-12	0.0256909	3.53181e-10	-	-	C	T	0.6223	0.1421	0.0316	6.893e-06	0.0319097	8.46056e-06
12:33512682_C_G	rs150799186	p11.1	12	33512682	0	453	Yes	0	0	0	0	C	G	0.9832	0.0043	0.9787	0.9872	0.6659	0.1017	5.718e-11	++	83.7	6.137	1	0.01324	755586	13666.6	SYT10	-	-	PKP2,-	C	G	0.987232	0.905048	0.131734	4.6e-12	0.140178	1.07196e-10	-	-	G	C	0.0213	-0.4007	0.1462	0.006129	0.147633	0.00664437
12:33593127_C_T	rs6488162	p11.1	12	33593127	1	453	Yes	0	0	0	0	T	C	0.4217	0.0106	0.4081	0.43	0.4358	0.0185	2.8e-123	++	0	0.899	1	0.3431	825747	390893	SYT10	-	-	PKP2,-	T	C	0.430046	0.449471	0.0220041	2.4e-95	0.0234145	3.97486e-82	-	-	C	T	0.5919	-0.4134	0.0297	5.982e-44	0.0299911	3.17788e-43
12:34059037_C_CT	rs536829226;rs35580577	p11.1	12	34059037	0	453	No, not in IC-RHR	0	0	0	0	CT	C	0.3935	0	0.3935	0.3935	0.2875	0.0236	5.11e-34	+?	0	0	0	1	485904	226501	ALG10	ALG10	-	-	C	CT	0.606454	-0.287463	0.0222171	1.1e-38	0.0236411	5.11033e-34	-	-	-	-	-	-	-	-	-	-
12:34101129_G_GTTA	rs200185964	p11.1	12	34101129	0	453	NOTUKB	0	0	0	0	G	GTTA	0.3489	0	0.3489	0.3489	0.2517	0.0335	6.016e-14	?+	0	0	0	1	279205	108871	ALG10	-	-	-	#N/A	#N/A	#N/A	#N/A	#N/A	#N/A	#N/A	#N/A	12:33232889_C_T	1	G	GTTA	0.3489	0.2517	0.0332	3.582e-14	0.0335254	6.01592e-14
12:34314468_A_ATG	rs75894858	p11.1	12	34314468	0	453	No, not in IC-RHR	0	0	0	0	A	ATG	0.2405	0.0015	0.2404	0.2633	-0.2612	0.0351	1.003e-13	--	0	0.088	1	0.7672	489418	102787	ALG10	-	-	-	ATG	A	0.759591	0.261931	0.0330699	1.4e-15	0.0351895	9.81021e-14	-	-	A	ATG	0.2633	-0.1083	0.5127	0.8327	0.517725	0.834304
12:38653362_C_T	rs1906263	q12	12	38653362	1	353	Yes	0	0	0	0	T	C	0.5706	0.0092	0.5634	0.5823	-0.2115	0.0184	1.228e-30	--	41.3	1.703	1	0.1919	830578	396414	ALG10B	-	-	-	T	C	0.56341	-0.230163	0.0219002	1.8e-26	0.0233039	5.25964e-23	-	-	C	T	0.4177	0.1807	0.0296	1.051e-09	0.0298901	1.48973e-09
12:39425167_C_T	rs113967051	q12	12	39425167	0	353	Yes	0	1	0	0	T	C	0.0457	0.0016	0.0445	0.0478	-0.2977	0.044	1.358e-11	--	0	0.094	1	0.7589	834289	66555.5	CPNE8	-	-	-	C	T	0.955478	0.287255	0.0522325	1.2e-08	0.0555804	2.36258e-07	-	-	C	T	0.9522	0.3152	0.0714	9.999e-06	0.0720999	1.23275e-05
12:49519185_A_G	rs7976890	q13.12	12	49519185	1	91	Yes	0	1	1	0	A	G	0.6327	0.0071	0.6235	0.6381	0.1215	0.0191	1.821e-10	++	0	0.009	1	0.9263	834576	372479	TUBA1B	-	TUBA1A	TUBA1A	A	G	0.638116	0.120153	0.0226206	1.1e-07	0.0240705	5.98456e-07	-	-	G	A	0.3765	-0.1238	0.0309	6.275e-05	0.0312029	7.26054e-05
12:52317057_C_G	rs2293093	q13.13	12	52317057	1	110	Yes	1	1	1	1	C	G	0.8827	0.0048	0.8765	0.8865	0.1855	0.0286	9.07e-11	++	0	0.085	1	0.7701	818719	161214	ACVRL1	-	-	-	C	G	0.886477	0.179022	0.0340104	2e-07	0.0361903	7.54895e-07	-	-	G	C	0.1235	-0.1963	0.0463	2.197e-05	0.0467538	2.68586e-05
12:56025054_G_T	rs3858540	q13.2	12	56025054	1	54	Yes	1	1	1	1	T	G	0.4341	0.0009	0.4329	0.4348	-0.1126	0.0184	8.845e-10	--	0	0.069	1	0.7927	807624	391290	OR10P1	-	-	-	T	G	0.434754	-0.108911	0.0218107	1e-06	0.0232087	2.69643e-06	-	-	G	T	0.5671	0.1189	0.0298	6.59e-05	0.0300921	7.77592e-05
12:57114100_A_G	rs2926743	q13.3	12	57114100	1	186	Yes	0	1	1	0	A	G	0.2698	0.0049	0.2633	0.2734	0.1491	0.0205	3.451e-13	++	44.2	1.793	1	0.1806	811948	313105	NACA	BAZ2A	NACA	RBMS2,BAZ2A,ATP5B,PTGES3	A	G	0.273443	0.128416	0.02413	4.2e-08	0.0256766	5.69513e-07	-	-	G	A	0.7367	-0.1855	0.0337	3.795e-08	0.0340303	5.00816e-08
12:64971147_A_G	rs1628543	q14.2	12	64971147	1	392	Yes	0	0	1	0	A	G	0.5533	0.0095	0.5411	0.5607	0.2543	0.0183	5.69e-44	++	30.7	1.443	1	0.2297	818206	397652	RASSF3	-	-	RASSF3	G	A	0.439329	-0.27143	0.0217725	1.9e-35	0.023168	1.05894e-31	-	-	G	A	0.4589	-0.2261	0.0295	1.638e-14	0.0297892	3.19881e-14
12:66373602_C_T	rs142095082	q14.3	12	66373602	1	268	Yes	0	1	1	0	T	C	0.5116	0.0145	0.493	0.5228	0.1574	0.0183	7.117e-18	++	0	0.53	1	0.4667	832110	397870	HMGA2	-	-	HMGA2	C	T	0.47717	-0.147048	0.0217416	7.4e-12	0.0231351	2.07016e-10	-	-	C	T	0.507	-0.1745	0.0295	3.337e-09	0.0297892	4.68938e-09
12:66422753_C_T	rs10784510	q14.3	12	66422753	0	268	Yes	0	1	1	0	T	C	0.6911	0.0004	0.6908	0.6916	0.1138	0.0194	4.674e-09	++	34.8	1.535	1	0.2154	827221	347711	HMGA2	-	-	-	T	C	0.690791	0.0947517	0.0232754	9.7e-05	0.0247673	0.000130409	-	-	C	T	0.3084	-0.1442	0.031	3.195e-06	0.0313039	4.09581e-06
12:82117216_A_C	rs10778828	q21.31	12	82117216	1	302	Yes	0	0	1	0	A	C	0.2376	0.0018	0.2353	0.2391	-0.2057	0.0212	2.846e-22	--	0	0.149	1	0.6999	835526	293936	PPFIA2	PPFIA2	-	-	C	A	0.760911	0.212184	0.0254109	5.7e-16	0.0270396	4.25606e-15	-	-	C	A	0.7647	0.1954	0.0338	7.419e-09	0.0341313	1.03465e-08
12:93709539_A_G	rs1135400	q22	12	93709539	1	28	Yes	0	1	1	0	A	G	0.5996	0.0017	0.5974	0.6009	-0.109	0.0184	3.236e-09	--	59.6	2.473	1	0.1158	820453	389375	NUDT4	-	-	-	A	G	0.600874	-0.0863379	0.0219609	4.1e-05	0.0233685	0.00022021	-	-	G	A	0.4026	0.146	0.0296	8.369e-07	0.0298901	1.03663e-06
13:111035483_A_G	rs2391825	q34	13	111035483	1	43	Yes	1	1	1	1	A	G	0.2774	0.0002	0.2772	0.2775	-0.1217	0.0202	1.768e-09	--	0	0.724	1	0.3948	821561	322500	COL4A2	-	-	COL4A2	G	A	0.72249	0.13516	0.02413	5.2e-09	0.0256766	1.41008e-07	-	-	G	A	0.7228	0.0997	0.0325	0.00218	0.0328186	0.00238221
13:28131503_C_T	rs2386688	q12.2	13	28131503	1	266	Yes	0	1	1	0	T	C	0.5501	0.0008	0.5491	0.5507	0.156	0.0181	7.183e-18	++	0	0.452	1	0.5012	827984	404106	LNX2	-	LNX2	LNX2	C	T	0.449348	-0.146366	0.0217151	4.9e-11	0.0231069	2.38444e-10	-	-	C	T	0.4509	-0.1714	0.0289	2.953e-09	0.0291833	4.27393e-09
13:41248026_C_T	rs9549258	q14.11	13	41248026	1	38	Yes	0	1	1	0	T	C	0.8042	0.0022	0.8025	0.8069	-0.1352	0.0227	2.374e-09	--	0	0.425	1	0.5142	837059	256635	FOXO1	-	MRPS31	FOXO1,ELF1	T	C	0.802481	-0.147018	0.0272221	4.1e-08	0.0289669	3.86733e-07	-	-	C	T	0.1931	0.1167	0.036	0.001183	0.0363529	0.00132642
13:69048878_A_T	rs75531212	q21.33	13	69048878	1	126	No, not in IC-RHR	0	1	1	0	A	T	0.477	0.0086	0.4751	0.5153	-0.1495	0.0225	3.05e-11	--	0	0.221	1	0.6383	552687	274264	KLHL1	-	-	-	T	A	0.524941	0.151813	0.0216596	2.8e-13	0.0230479	4.49256e-11	-	-	T	A	0.4847	0.1021	0.1022	0.3176	0.103202	0.322505
13:73730549_C_T	rs7983621	q22.1	13	73730549	1	37	No, not in IC-RHR	0	1	1	0	T	C	0.5237	0.0041	0.5182	0.5268	0.1103	0.0185	2.393e-09	++	74.5	3.914	1	0.04788	805273	389002	KLF5	-	-	KLF5	T	C	0.526769	0.137783	0.0217204	2.5e-10	0.0231126	2.50111e-09	-	-	C	T	0.4818	-0.0616	0.0305	0.04349	0.030799	0.045493
13:98859019_A_T	rs9554446	q32.2	13	98859019	1	128	Yes	0	1	1	0	A	T	0.1241	0.0255	0.1034	0.1556	-0.1991	0.0299	2.734e-11	--	0	0.574	1	0.4487	831033	151362	FARP1	-	-	FARP1	T	A	0.89658	0.217497	0.0361771	2e-09	0.0384959	1.60565e-08	-	-	T	A	0.8444	0.1712	0.047	0.0002728	0.0474607	0.000309524
14:102614961_G_T	rs1190579	q32.31	14	102614961	1	75	Yes	0	1	1	0	T	G	0.9121	0.0039	0.9072	0.9152	-0.2012	0.0322	4.045e-10	--	0	0.005	1	0.9431	809083	128549	HSP90AA1,WDR20	-	-	HSP90AA1	G	T	0.0847719	0.203016	0.0385901	2.5e-07	0.0410636	7.65574e-07	-	-	G	T	0.0928	0.1983	0.0513	0.0001113	0.0518028	0.000129202
14:21542740_A_G	rs45519335	q11.2	14	21542740	0	432	No, not in IC-RHR	0	0	1	0	A	G	0.0052	0.0003	0.0037	0.0052	0.9032	0.1554	6.171e-09	+-	85.7	6.982	1	0.008232	562607	5557.96	NDRG2,ARHGEF40	-	ARHGEF40	-	G	A	0.994756	-0.982645	0.148745	2e-10	0.158279	5.35568e-10	-	-	G	A	0.9963	1.218	0.8097	0.1325	0.817637	0.136314
14:21542766_A_G	rs12889267	q11.2	14	21542766	1	432	Yes	0	0	1	0	A	G	0.8369	0.0007	0.8364	0.8379	-0.4584	0.025	3.972e-75	--	78.2	4.597	1	0.03203	822260	211991	NDRG2,ARHGEF40	-	ARHGEF40	ZNF219,ARHGEF40,NDRG2	A	G	0.836397	-0.497384	0.0290407	9.7e-68	0.0309021	2.74428e-58	-	-	G	A	0.1621	0.3847	0.0421	6.6e-20	0.0425127	1.44193e-19
14:21555087_A_AAATC	rs145744937	q11.2	14	21555087	0	432	Yes	0	0	1	0	A	AAATC	0.5873	0.02	0.5617	0.6029	-0.1818	0.0193	3.61e-21	--	69.2	3.25	1	0.07141	770030	337188	ARHGEF40,ZNF219	-	-	-	AAATC	A	0.397097	0.208872	0.0229442	4.4e-20	0.0244148	1.17737e-17	-	-	A	AAATC	0.5617	-0.1373	0.031	9.474e-06	0.0313039	1.15433e-05
14:23793519_C_T	rs200285827	q11.2	14	23793519	0	493	No, not in IC-RHR	0	0	0	0	T	C	0.0123	0	0.0123	0.0123	0.709	0.1108	1.569e-10	+?	0	0	0	1	485904	10324.8	BCL2L2-PABPN1,PABPN1	-	-	-	C	T	0.987664	-0.708971	0.104129	7.1e-12	0.110803	1.56943e-10	-	-	-	-	-	-	-	-	-	-
14:23858697_C_G	rs34935550	q11.2	14	23858697	0	493	Yes	0	0	0	0	C	G	0.9963	0.0013	0.992	0.9967	1.8737	0.1896	4.951e-23	++	0	0.066	1	0.7973	579700	3817.58	CMTM5,MYH6	-	MYH6	-	C	G	0.996666	1.8591	0.186061	4.5e-24	0.197987	5.99873e-21	-	-	G	C	0.008	-2.0357	0.652	0.001795	0.658391	0.00198858
14:23865885_A_G	rs452036	q11.2	14	23865885	1	493	Yes	0	0	0	0	A	G	0.3627	0.0008	0.3621	0.3637	0.724	0.0189	1,27E-322	++	93.8	16.003	1	6.323e-05	827892	373019	MYH6	-	MYH6	MYH7,MYH6,PABPN1	G	A	0.637941	-0.782713	0.0224519	1.2e-269	0.023891	2.05735e-235	-	-	G	A	0.6363	-0.6271	0.0304	7.91e-95	0.030698	9.41803e-93
14:23882896_C_T	rs45553533	q11.2	14	23882896	0	493	Yes	0	0	0	0	T	C	0.0137	0.0006	0.0127	0.0141	-0.7261	0.0874	9.976e-17	--	0	0.012	1	0.9114	748208	17564.1	MYH6,MYH7	-	-	-	C	T	0.98592	0.720134	0.0962714	2e-14	0.102442	2.07014e-12	-	-	C	T	0.9873	0.742	0.1661	7.946e-06	0.167728	9.6968e-06
14:23907608_C_G	rs875908	q11.2	14	23907608	0	493	Yes	0	0	0	0	C	G	0.3762	0.0054	0.3722	0.3835	0.1972	0.0192	8.392e-25	++	0	0.994	1	0.3188	772512	344959	MYH7	-	-	-	C	G	0.372182	0.211409	0.0224647	1.6e-20	0.0239046	9.24635e-19	-	-	G	C	0.6165	-0.1715	0.0318	6.696e-08	0.0321117	9.2572e-08
14:24899473_C_G	rs10146358	q12	14	24899473	1	209	Yes	0	1	1	0	C	G	0.0847	0.0043	0.0816	0.0907	0.2589	0.034	2.741e-14	++	0	0.495	1	0.4819	831021	113530	CBLN3,KHNYN,SDR39U1	CBLN3	-	KHNYN	G	C	0.918425	-0.276	0.0392833	2.6e-11	0.0418012	4.03786e-11	-	-	G	C	0.9093	-0.2254	0.058	0.0001025	0.0585685	0.000118851
14:31835779_G_T	rs7149240	q12	14	31835779	1	227	Yes	0	1	1	0	T	G	0.5819	0.0032	0.5793	0.5859	0.1426	0.0181	3.018e-15	++	0	0.003	1	0.9533	835445	403054	HEATR5A	RP11-176H8.1	HEATR5A	HEATR5A	T	G	0.579313	0.14347	0.0217804	2.6e-11	0.0231764	6.00346e-10	-	-	G	T	0.4141	-0.1413	0.0286	7.653e-07	0.0288803	9.95113e-07
14:52521436_A_G	rs1540702	q22.1	14	52521436	1	218	Yes	0	1	1	0	A	G	0.2499	0.013	0.2393	0.2657	0.1609	0.0208	1.154e-14	++	48.3	1.935	1	0.1643	832639	303503	NID2	-	NID2	NID2	A	G	0.239253	0.184657	0.0253084	5.5e-14	0.0269306	7.04291e-12	-	-	G	A	0.7343	-0.1255	0.0326	0.0001192	0.0329195	0.000137666
14:55481919_A_G	rs28693954	q22.2	14	55481919	1	52	Yes	0	1	1	0	A	G	0.6672	0.0027	0.665	0.6706	0.1184	0.0193	9.279e-10	++	0	0.535	1	0.4647	834254	354824	WDHD1	-	-	SOCS4	A	G	0.665032	0.129507	0.0231167	2.4e-08	0.0245984	1.40298e-07	-	-	G	A	0.3294	-0.1004	0.031	0.001193	0.0313039	0.00134
14:64408135_A_C	rs2184292	q23.2	14	64408135	1	11	Yes	0	1	1	0	A	C	0.302	0.0048	0.2982	0.3081	0.114	0.0196	6.166e-09	++	0	0.479	1	0.4889	821935	344364	SYNE2	-	-	SYNE2	A	C	0.298212	0.124686	0.0234912	2.1e-07	0.0249969	6.09884e-07	-	-	C	A	0.6919	-0.0968	0.0313	0.001999	0.0316068	0.002194
14:67980031_A_G	rs12878981	q24.1	14	67980031	1	69	Yes	1	1	1	1	A	G	0.5177	0.0093	0.5105	0.5297	0.1126	0.0181	4.82e-10	++	14.3	1.167	1	0.2801	818609	403643	TMEM229B	-	-	-	A	G	0.510499	0.127842	0.02154	2e-09	0.0229206	2.43864e-08	-	-	G	A	0.4703	-0.0875	0.0292	0.002772	0.0294862	0.00300244
14:72393177_G_T	rs11846754	q24.2	14	72393177	0	428	Yes	0	0	1	0	T	G	0.9407	0.0089	0.9302	0.9483	0.2487	0.0397	3.916e-10	++	0	0.012	1	0.9142	836105	81932.3	RGS6	-	AC005477.1	-	T	G	0.948292	0.252375	0.0491278	3.9e-07	0.0522767	1.38134e-06	-	-	G	T	0.0698	-0.2437	0.0606	5.821e-05	0.061194	6.82181e-05
14:72846021_A_G	rs10137579	q24.2	14	72846021	0	428	Yes	0	0	1	0	A	G	0.3933	0.0009	0.3926	0.3944	0.2466	0.0185	2.393e-40	++	0	0.012	1	0.9113	837060	386694	RGS6	-	-	RGS6	G	A	0.607381	-0.244964	0.02232	8e-29	0.0237506	6.09092e-25	-	-	G	A	0.6056	-0.2492	0.0294	2.451e-17	0.0296882	4.70221e-17
14:72885471_C_G	rs17180489	q24.2	14	72885471	1	428	Yes	0	0	1	0	C	G	0.1406	0.0025	0.1354	0.1418	-0.5338	0.0294	1.475e-73	--	90.7	10.737	1	0.00105	745828	156456	RGS6	-	-	RGS6	G	C	0.858185	0.581302	0.0308261	3.2e-80	0.0328019	2.85763e-70	-	-	G	C	0.8646	0.3382	0.0659	2.87e-07	0.0665459	3.73083e-07
14:78296468_C_T	rs10149767	q24.3	14	78296468	1	224	Yes	0	0	1	0	T	C	0.8402	0.0056	0.8334	0.8448	-0.1923	0.0248	8.549e-15	--	0	0.617	1	0.4323	834641	215916	ADCK1	-	-	-	T	C	0.844798	-0.208356	0.0301814	1.3e-11	0.0321159	8.71988e-11	-	-	C	T	0.1666	0.1687	0.0386	1.214e-05	0.0389784	1.5044e-05
14:85811614_A_G	rs12886126	q31.3	14	85811614	1	443	Yes	0	0	0	0	A	G	0.2819	0.0027	0.2797	0.2852	-0.427	0.0199	8.31e-102	--	38	1.614	1	0.204	837060	332358	FLRT2	FLRT2	-	-	G	A	0.720274	0.447493	0.0240886	1.4e-79	0.0256326	2.99353e-68	-	-	G	A	0.7148	0.3957	0.0314	2.501e-36	0.0317078	9.64865e-36
14:91589787_A_G	rs6575178	q32.11	14	91589787	1	311	Yes	0	0	1	0	A	G	0.2245	0.0024	0.2212	0.2263	-0.2177	0.022	3.703e-23	--	0	0.126	1	0.7224	802580	276330	C14orf159	C14orf159,RPS6KA5	-	RPS6KA5	A	G	0.226286	-0.211912	0.0257476	9.7e-17	0.0273979	1.03726e-14	-	-	G	A	0.7788	0.2282	0.0364	3.452e-10	0.0367568	5.35348e-10
14:92550658_A_G	rs8014854	q32.12	14	92550658	0	311	Yes	0	0	1	0	A	G	0.3462	0.0018	0.3439	0.3476	0.1305	0.0189	4.519e-12	++	53.1	2.131	1	0.1444	831399	371910	ATXN3	-	-	TRIP11,ATXN3,FBLN5	G	A	0.652392	-0.10885	0.0225575	8.5e-07	0.0240033	5.76622e-06	-	-	G	A	0.6561	-0.1655	0.0302	4.437e-08	0.030496	5.73291e-08
14:94363887_C_T	rs72698224	q32.12	14	94363887	1	58	Yes	0	1	1	0	T	C	0.9193	0.0035	0.915	0.9221	-0.2081	0.0338	7.465e-10	--	0	0.019	1	0.8904	825866	116193	FAM181A	-	-	-	T	C	0.9221	-0.211822	0.0408611	1.9e-07	0.0434801	1.10644e-06	-	-	C	T	0.085	0.2023	0.0532	0.000142	0.0537215	0.00016607
15:43983307_A_G	rs62018939	q15.3	15	43983307	1	6	Yes	1	1	1	1	A	G	0.1628	0.0007	0.1623	0.1637	0.1418	0.0245	7.71e-09	++	0	0	1	0.9888	834402	217467	STRC,CKMT1A	-	WDR76	-	G	A	0.837704	-0.141491	0.0292245	3.4e-07	0.0310977	5.36738e-06	-	-	G	A	0.8363	-0.1422	0.0396	0.0003348	0.0399882	0.000376468
15:63359564_A_C	rs4619348	q22.2	15	63359564	1	185	Yes	0	1	1	0	A	C	0.4386	0.0018	0.4372	0.4409	-0.1323	0.0183	4.526e-13	--	0	0.517	1	0.472	806119	395314	TPM1	-	-	TPM1	A	C	0.437198	-0.142471	0.0217089	1e-11	0.0231004	6.93859e-10	-	-	C	A	0.5591	0.1153	0.0296	9.804e-05	0.0298901	0.000114572
15:63987583_A_T	rs79976004	q22.31	15	63987583	0	185	No, not in IC-RHR	0	1	1	0	A	T	0.1859	0.0019	0.1857	0.2069	0.2051	0.0293	2.635e-12	++	0	0.045	1	0.8316	489754	147912	HERC1	-	-	-	T	A	0.814279	-0.204559	0.0276711	7.2e-13	0.0294447	3.72539e-12	-	-	T	A	0.7931	-0.2731	0.3178	0.3901	0.320915	0.394767
15:69068176_G_T	rs11072053	q23	15	69068176	1	97	Yes	1	1	1	1	T	G	0.1986	0.0187	0.1844	0.2233	-0.1569	0.0245	1.626e-10	--	0	0.812	1	0.3675	799288	226392	ANP32A	ANP32A	-	ANP32A	T	G	0.184407	-0.173684	0.0289277	2.4e-09	0.0307818	1.6768e-08	-	-	G	T	0.7767	0.1277	0.0403	0.001541	0.040695	0.00170119
15:73099972_C_T	rs76536893	q24.1	15	73099972	0	442	Yes	0	0	0	0	T	C	0.5947	0.001	0.5934	0.5954	0.1439	0.0184	5.025e-15	++	42.7	1.746	1	0.1863	835445	393529	ADPGK	-	-	-	C	T	0.404553	-0.163212	0.0220622	2.8e-13	0.0234763	3.59622e-12	-	-	C	T	0.4066	-0.1133	0.0293	0.0001075	0.0295872	0.000128477
15:73592793_A_G	rs2680340	q24.1	15	73592793	0	442	Yes	0	0	0	0	A	G	0.4193	0.0011	0.4179	0.4202	-0.2202	0.0181	3.343e-34	--	40.9	1.691	1	0.1934	835445	403309	NEO1	-	-	-	G	A	0.57984	0.201189	0.0218495	5.2e-21	0.02325	5.00294e-18	-	-	G	A	0.5821	0.2492	0.0284	1.938e-18	0.0286784	3.64121e-18
15:73667255_G_T	rs7172038	q24.1	15	73667255	1	442	Yes	0	0	0	0	T	G	0.833	0.0059	0.8255	0.8377	0.4891	0.0244	2.77e-89	++	55.5	2.249	1	0.1337	827223	220646	HCN4	-	-	ARIH1,NEO1,C15orf60	T	G	0.83769	0.518091	0.0292809	2.6e-71	0.0311577	4.36698e-62	-	-	G	T	0.1745	-0.4429	0.0389	5.356e-30	0.0392813	1.74208e-29
15:74336633_C_T	rs5742915	q24.1	15	74336633	0	442	Yes	0	0	0	0	T	C	0.5573	0.0049	0.5537	0.564	0.1376	0.0187	1.924e-13	++	0	0.206	1	0.6503	803479	382309	PML	-	PML	-	T	C	0.55374	0.143883	0.0218292	2.8e-10	0.0232284	5.85516e-10	-	-	C	T	0.436	-0.1261	0.0313	5.563e-05	0.0316068	6.61715e-05
15:83641353_C_G	rs11259963	q25.2	15	83641353	1	219	Yes	0	1	1	0	C	G	0.5234	0.0028	0.5211	0.5269	-0.1406	0.0182	1.132e-14	--	0	0.001	1	0.981	832112	409426	HOMER2	-	-	FSD2,BTBD1,HOMER2	G	C	0.478914	0.140212	0.0220274	3.1e-11	0.0234393	2.20512e-09	-	-	G	C	0.4731	0.1411	0.0286	7.722e-07	0.0288803	1.03074e-06
15:92421883_A_G	rs12905016	q26.1	15	92421883	1	29	Yes	1	1	1	1	A	G	0.3273	0.0055	0.3198	0.3313	-0.1177	0.0199	3.001e-09	--	48.2	1.93	1	0.1648	822383	341070	SLCO3A1	-	-	SLCO3A1	A	G	0.33131	-0.097762	0.0230391	1.9e-05	0.0245158	6.67135e-05	-	-	G	A	0.6802	0.1558	0.0335	3.268e-06	0.0338284	4.11274e-06
15:93530260_C_G	rs11074123	q26.1	15	93530260	1	14	Yes	1	1	1	1	C	G	0.7458	0.0064	0.7377	0.7509	0.1213	0.0208	5.648e-09	++	0	0.104	1	0.747	822788	307952	CHD2	-	-	CHD2	G	C	0.249125	-0.126682	0.0250166	2.7e-07	0.0266201	1.94658e-06	-	-	G	C	0.2623	-0.1129	0.0331	0.0006512	0.0334244	0.000730769
15:95312071_C_T	rs12906962	q26.2	15	95312071	1	370	Yes	0	1	1	0	T	C	0.6673	0.0078	0.6573	0.6734	-0.2391	0.0195	1.883e-34	--	93	14.356	1	0.0001513	822824	350378	MCTP2	-	-	-	T	C	0.673363	-0.297023	0.0233077	3e-36	0.0248016	4.74976e-33	-	-	C	T	0.3427	0.1445	0.0314	4.323e-06	0.0317078	5.183e-06
15:99714970_T_TA	rs35205370	q26.3	15	99714970	1	178	Yes	0	1	1	0	T	TA	0.7358	0.0044	0.7304	0.7393	-0.1458	0.0205	1.042e-12	--	0	0.051	1	0.8205	827302	315368	TTC23	-	-	SYNM	T	TA	0.739347	-0.1495	0.0246857	5.3e-10	0.026268	1.26042e-08	-	-	T	TA	0.7304	-0.14	0.0323	1.447e-05	0.0326166	1.76838e-05
16:10757192_A_G	rs1548956	p13.13	16	10757192	1	265	Yes	0	0	1	0	A	G	0.6302	0.0022	0.6285	0.633	-0.1608	0.0187	7.688e-18	--	30.2	1.433	1	0.2312	820227	379077	TEKT5	-	-	-	A	G	0.628541	-0.178422	0.0223595	8.2e-16	0.0237927	6.42878e-14	-	-	G	A	0.367	0.1324	0.0299	9.285e-06	0.0301931	1.15927e-05
16:15133783_C_CT	rs34345533	p13.11	16	15133783	0	435	No, not in IC-RHR	0	0	1	0	CT	C	0.2827	0.0008	0.2732	0.2828	0.151	0.0258	4.756e-09	++	0	0.074	1	0.7853	489754	190472	PDXDC1,NTAN1	-	NTAN1	-	C	CT	0.717188	-0.151546	0.0243121	6.7e-10	0.0258704	4.68784e-09	-	-	C	CT	0.7268	-0.0667	0.3073	0.8281	0.310312	0.82981
16:15912544_C_T	rs3915425	p13.11	16	15912544	1	435	Yes	0	0	1	0	T	C	0.672	0.0033	0.6679	0.6746	-0.3559	0.0193	4.666e-76	--	0	0.472	1	0.4919	837057	358077	MYH11	-	-	MYH11,KIAA0430	T	C	0.674633	-0.366545	0.0232419	1.6e-55	0.0247316	1.07318e-49	-	-	C	T	0.3321	0.3394	0.0305	8.425e-29	0.030799	3.0656e-28
16:16109242_A_G	rs246212	p13.11	16	16109242	0	435	Yes	0	0	1	0	A	G	0.7296	0.0059	0.7223	0.7343	-0.1758	0.0204	7.298e-18	--	0	0.499	1	0.4801	832636	318564	ABCC1	-	-	-	G	A	0.265689	0.187264	0.0245466	1.2e-14	0.0261199	7.53328e-13	-	-	G	A	0.2777	0.1577	0.0324	1.092e-06	0.0327176	1.43531e-06
16:1691106_C_T	rs2072986	p13.3	16	1691106	1	173	Yes	0	1	1	0	T	C	0.8316	0.026	0.7993	0.8525	0.1838	0.0259	1.393e-12	++	0	0.007	1	0.9349	807331	200949	CRAMP1L	-	-	CRAMP1L,MAPK8IP3	T	C	0.852534	0.185537	0.031293	2.4e-10	0.0332988	2.5199e-08	-	-	C	T	0.2007	-0.1812	0.041	9.788e-06	0.0414019	1.20538e-05
16:17426113_G_T	rs4780694	p12.3	16	17426113	1	94	Yes	1	1	1	1	T	G	0.3833	0.0037	0.3804	0.3879	0.1176	0.0184	1.638e-10	++	0	0.029	1	0.8642	835442	389953	XYLT1	-	-	XYLT1	T	G	0.380366	0.115056	0.0221681	1.8e-07	0.023589	1.07422e-06	-	-	G	T	0.6121	-0.1215	0.0291	3.017e-05	0.0293852	3.55373e-05
16:20028998_C_T	rs2521478	p12.3	16	20028998	1	284	Yes	0	1	1	0	T	C	0.7296	0.0108	0.7156	0.7379	0.1893	0.0206	4.444e-20	++	44.7	1.807	1	0.1788	792342	310784	GPR139	-	-	GPRC5B	T	C	0.737912	0.210708	0.0244981	1e-18	0.0260683	6.32381e-16	-	-	C	T	0.2844	-0.1534	0.0334	4.35e-06	0.0337274	5.40983e-06
16:2195432_A_C	rs445835	p13.3	16	2195432	0	173	Yes	0	1	1	0	A	C	0.8065	0.0146	0.7868	0.8172	-0.1455	0.0239	1.175e-09	--	0	0.36	1	0.5485	807991	231937	PKD1,RAB26	-	PKD1	-	C	A	0.18277	0.134894	0.0279742	2.8e-07	0.0297672	5.8531e-06	-	-	C	A	0.2132	0.1649	0.0398	3.376e-05	0.0401901	4.0783e-05
16:22098662_C_T	rs72784941	p12.2	16	22098662	1	20	Yes	0	1	1	0	T	C	0.9291	0.0056	0.9198	0.9325	-0.2321	0.0395	4.338e-09	--	0	0.123	1	0.7262	764029	89891.7	C16orf52,VWA3A	-	-	UQCRC2	T	C	0.932472	-0.240474	0.0434122	1.6e-08	0.0461947	1.93311e-07	-	-	C	T	0.0802	0.2092	0.0757	0.005726	0.076442	0.0062056
16:30692208_C_T	rs8048448	p11.2	16	30692208	1	248	Yes	1	1	1	1	T	C	0.7158	0.0122	0.7006	0.7255	-0.169	0.0203	9.499e-17	--	0	0.793	1	0.3731	837057	325769	FBRS	C16orf93,RNF40	PRR14	ZNF629,BCL7C,PRR14,SRCAP,-,FBRS,RNF40,CTF1	T	C	0.725545	-0.154488	0.0244907	7.4e-10	0.0260605	3.06529e-09	-	-	C	T	0.2994	0.1916	0.0322	2.777e-09	0.0325156	3.80276e-09
16:4260791_C_T	rs7197155	p13.3	16	4260791	1	324	Yes	0	1	1	0	T	C	0.4849	0.0012	0.4834	0.4858	0.1828	0.018	3.848e-24	++	49	1.959	1	0.1616	832109	406337	SRL	-	-	SRL,GLIS2,TFAP4	T	C	0.485767	0.162947	0.0215573	2.1e-14	0.022939	1.21653e-12	-	-	C	T	0.5166	-0.2149	0.0289	9.815e-14	0.0291833	1.78739e-13
16:51188710_A_G	rs71386547	q12.1	16	51188710	1	47	No, not in IC-RHR	0	1	1	0	A	G	0.2043	0.0057	0.1998	0.2116	0.1363	0.0226	1.528e-09	++	79	4.765	1	0.02904	830140	259400	SALL1	-	-	-	G	A	0.800239	-0.17491	0.0269428	4.7e-11	0.0286697	1.05498e-09	-	-	G	A	0.7884	-0.0735	0.0362	0.04212	0.0365548	0.0443595
16:53496598_A_G	rs7204496	q12.2	16	53496598	1	342	Yes	0	1	1	0	A	G	0.4672	0.0013	0.4662	0.4688	-0.1968	0.0181	1.67e-27	--	0	0.408	1	0.5231	815417	404017	RBL2	AKTIP,RBL2	-	-	G	A	0.533801	0.205796	0.0215307	1.5e-22	0.0229107	2.64643e-19	-	-	G	A	0.5312	0.1819	0.0293	5.4e-10	0.0295872	7.8501e-10
16:56352854_A_C	rs2398144	q12.2	16	56352854	1	10	Yes	1	1	1	1	A	C	0.4089	0.0072	0.4032	0.418	0.1069	0.0184	6.74e-09	++	0	0.015	1	0.901	818612	388825	GNAO1	-	-	-	C	A	0.596838	-0.108705	0.0221514	4.1e-07	0.0235712	3.99256e-06	-	-	C	A	0.582	-0.104	0.0293	0.0003903	0.0295872	0.000439698
16:58558707_C_T	rs37053	q21	16	58558707	1	127	Yes	1	1	1	1	T	C	0.7474	0.0054	0.7407	0.7518	0.1374	0.0206	2.869e-11	++	0	0.01	1	0.922	825688	310696	SETD6,CNOT1	CNOT1	-	CNOT1,NDRG4	T	C	0.751774	0.135758	0.0248663	2.3e-08	0.0264601	2.88723e-07	-	-	C	T	0.2593	-0.1399	0.0327	1.865e-05	0.0330205	2.26769e-05
16:64610269_A_G	rs72786820	q21	16	64610269	0	422	Yes	0	0	1	0	A	G	0.3521	0	0.3521	0.3521	-0.1114	0.0187	2.391e-09	--	0	0.112	1	0.7374	837057	376677	CDH11	-	-	CDH11	G	A	0.647865	0.106384	0.0225097	6.5e-06	0.0239525	8.93501e-06	-	-	G	A	0.6479	0.1192	0.0295	5.403e-05	0.0297892	6.29539e-05
16:64899481_A_C	rs10500503	q21	16	64899481	0	422	Yes	0	0	1	0	A	C	0.5764	0.0051	0.5724	0.5828	0.2056	0.0181	8.301e-30	++	0	0.209	1	0.6472	834251	399180	CDH11	-	-	CDH11	A	C	0.572379	0.199034	0.0216919	5.5e-20	0.0230823	6.53296e-18	-	-	C	A	0.4172	-0.2161	0.029	1.013e-13	0.0292843	1.59014e-13
16:65284815_A_G	rs2055726	q21	16	65284815	1	422	Yes	0	0	1	0	A	G	0.5509	0.0025	0.5478	0.5528	-0.3097	0.018	2.922e-66	--	18.4	1.226	1	0.2682	829303	405846	CDH11	-	-	CDH11	G	A	0.447169	0.325609	0.0216536	7.4e-52	0.0230415	2.43221e-45	-	-	G	A	0.4522	0.2847	0.0286	2.453e-23	0.0288803	6.3349e-23
16:661142_C_T	rs7204088	p13.3	16	661142	1	154	Yes	0	1	1	0	T	C	0.7735	0.007	0.7645	0.7789	0.1519	0.0219	4.328e-12	++	0	0.189	1	0.6638	810389	277469	RAB40C	RAB40C,WFIKKN1	-	RHOT2,-,-,STUB1,MSLN	T	C	0.778907	0.159223	0.026008	3.1e-10	0.027675	8.75106e-09	-	-	C	T	0.2355	-0.1395	0.0356	8.947e-05	0.0359489	0.000104241
16:66285448_A_G	rs79507312	q21	16	66285448	0	364	Yes	0	0	1	0	A	G	0.0323	0.0004	0.0317	0.0325	-0.3084	0.0527	4.741e-09	--	0	0.059	1	0.8077	812005	48636.3	CDH5	-	-	CDH5	G	A	0.967475	0.317355	0.0604487	2.4e-07	0.0643232	8.06634e-07	-	-	G	A	0.9683	0.2901	0.0908	0.001399	0.09169	0.00155659
16:66937003_G_T	rs28623312	q22.1	16	66937003	1	364	Yes	0	1	1	0	T	G	0.1177	0.0333	0.0888	0.156	0.3823	0.0321	8.583e-33	++	0	0.055	1	0.814	836923	136851	PDP2,CDH16	-	-	RRAD,CBFB,-	G	T	0.911166	-0.388833	0.0399002	1.3e-23	0.0424576	5.27994e-20	-	-	G	T	0.844	-0.3736	0.0484	1.178e-14	0.0488744	2.10442e-14
16:67543463_C_T	rs138226610	q22.1	16	67543463	0	364	Yes	0	1	1	0	T	C	0.0246	0.0002	0.0244	0.0247	-0.4177	0.0626	2.511e-11	--	0	0.986	1	0.3207	813500	35488	FAM65A	-	ZDHHC1	FHOD1,E2F4,EXOC3L1	C	T	0.975257	0.461455	0.0719405	9.9e-11	0.0765516	1.65974e-09	-	-	C	T	0.9756	0.3294	0.1077	0.002224	0.108756	0.00245521
16:6913083_C_G	rs7206016	p13.3	16	6913083	0	125	Yes	0	1	1	0	C	G	0.2569	0.0068	0.2482	0.2622	0.1362	0.0206	4.058e-11	++	0	0.51	1	0.4751	831396	311298	RBFOX1	-	-	-	G	C	0.737817	-0.124843	0.0245203	3.4e-07	0.0260919	1.71215e-06	-	-	G	C	0.7518	-0.1553	0.0334	3.247e-06	0.0337274	4.13325e-06
16:69940355_A_G	rs11075746	q22.1	16	69940355	1	42	Yes	0	1	1	0	A	G	0.5026	0.0052	0.4956	0.5065	0.1125	0.0187	1.769e-09	++	0	0.414	1	0.5202	832109	383899	WWP2	-	-	-	G	A	0.493471	-0.121458	0.0219333	7.8e-08	0.0233391	1.94992e-07	-	-	G	A	0.5044	-0.0964	0.0309	0.001805	0.0312029	0.00200522
16:72097279_C_T	rs28731397	q22.2	16	72097279	1	101	Yes	1	1	1	1	T	C	0.69	0.0215	0.6746	0.7201	0.1326	0.0206	1.262e-10	++	0	0.597	1	0.4396	837057	314005	TXNL4B,HP,HPR	-	-	DHX38	T	C	0.674636	0.143975	0.0238148	1.1e-09	0.0253412	1.33555e-08	-	-	C	T	0.2799	-0.1103	0.0351	0.001682	0.035444	0.00185858
16:73043247_A_G	rs8060855	q22.3	16	73043247	0	101	Yes	1	1	1	1	A	G	0.0899	0.002	0.0872	0.0914	-0.1932	0.0316	1.009e-09	--	0	0.087	1	0.7683	821663	131416	ZFHX3	-	-	ZFHX3	G	A	0.908582	0.200191	0.0371945	8.4e-08	0.0395785	4.23515e-07	-	-	G	A	0.9128	0.1808	0.0521	0.0005233	0.0526107	0.000589142
16:7381106_C_G	rs17671597	p13.3	16	7381106	1	125	Yes	0	1	1	0	C	G	0.5185	0.0009	0.5173	0.5193	0.1224	0.0185	3.329e-11	++	9.4	1.104	1	0.2934	812974	392222	RBFOX1	-	-	RBFOX1	C	G	0.519267	0.107598	0.021842	8.3e-07	0.023242	3.66607e-06	-	-	G	C	0.4827	-0.1478	0.0301	9.34e-07	0.030395	1.15833e-06
16:75200037_A_G	rs12923447	q23.1	16	75200037	1	21	Yes	1	1	1	1	A	G	0.5521	0.0007	0.5515	0.553	0.1064	0.0181	4.333e-09	++	64.5	2.819	1	0.09317	835442	402574	ZFP1	-	-	-	G	A	0.448484	-0.082417	0.0216742	9.5e-05	0.0230634	0.00035225	-	-	G	A	0.447	-0.145	0.029	5.883e-07	0.0292843	7.36565e-07
17:15134006_C_T	rs1804193	p12	17	15134006	1	399	Yes	0	0	1	0	T	C	0.0753	0.0052	0.0715	0.0823	0.509	0.0357	5.065e-46	++	75	4	1	0.04549	824985	102653	PMP22	-	-	PMP22	C	T	0.928536	-0.561435	0.0416649	4.4e-43	0.0443354	9.43919e-37	-	-	C	T	0.9177	-0.4116	0.0598	5.858e-12	0.0603862	9.35246e-12
17:15187558_G_T	rs79416189	p12	17	15187558	0	399	Yes	0	0	1	0	T	G	0.0444	0.0029	0.0401	0.0463	-0.3571	0.0454	3.795e-15	--	75.5	4.081	1	0.04338	821067	63315.1	PMP22	-	-	-	G	T	0.953675	0.417471	0.0511032	2.3e-17	0.0543787	1.62724e-14	-	-	G	T	0.9599	0.2177	0.0818	0.007745	0.0826018	0.00840046
17:15228904_A_C	rs80004349	p12	17	15228904	0	399	Yes	0	0	1	0	A	C	0.035	0.0009	0.0334	0.0356	-0.3446	0.0546	2.844e-10	--	0	0.039	1	0.8431	795190	45286.6	TEKT3	-	-	-	C	A	0.964436	0.350907	0.0593728	4.4e-09	0.0631784	2.7884e-08	-	-	C	A	0.9666	0.326	0.1078	0.0025	0.108857	0.00274657
17:15341736_C_CAG	rs77537673	p12	17	15341736	0	399	Yes	0	0	1	0	CAG	C	0.8753	0.0217	0.8494	0.8935	0.2393	0.0289	1.24e-16	++	48.8	1.952	1	0.1624	832520	159750	CDRT4,TVP23C-CDRT4,TVP23C	-	CDRT4	-	CAG	C	0.893536	0.2054	0.0354842	4e-09	0.0377586	5.33339e-08	-	-	C	CAG	0.1506	-0.2874	0.0445	1.033e-10	0.0449362	1.59776e-10
17:17133121_A_G	rs1613416	p11.2	17	17133121	1	330	Yes	0	0	1	0	A	G	0.5494	0.0007	0.5488	0.5503	0.1864	0.0179	2.52e-25	++	0	0.363	1	0.5466	835443	410914	FLCN	FLCN,PLD6	-	-	G	A	0.451185	-0.195121	0.0216336	1.1e-19	0.0230202	2.32931e-17	-	-	G	A	0.4497	-0.173	0.0283	1.037e-09	0.0285774	1.41525e-09
17:17707105_C_T	rs3818717	p11.2	17	17707105	0	330	Yes	0	0	1	0	T	C	0.4375	0.0106	0.4292	0.4511	0.1604	0.0186	6.981e-18	++	84.3	6.355	1	0.0117	820532	389335	RAI1,SREBF1	-	-	-	T	C	0.429229	0.196897	0.0221702	8e-19	0.0235912	7.0495e-17	-	-	C	T	0.5489	-0.1001	0.03	0.0008383	0.0302941	0.000952213
17:36860927_G_T	rs3760148	q12	17	36860927	1	159	Yes	0	1	1	0	T	G	0.1847	0.0061	0.1767	0.1893	0.1623	0.0234	3.732e-12	++	53.5	2.15	1	0.1426	831990	241134	MLLT6	-	C17orf96	MLLT6	G	T	0.810673	-0.188254	0.027548	2.1e-11	0.0293137	1.34455e-10	-	-	G	T	0.8233	-0.1171	0.0383	0.0022	0.0386754	0.00246371
17:37830447_A_T	rs2934956	q12	17	37830447	0	159	Yes	0	1	1	0	A	T	0.6677	0.008	0.6576	0.674	-0.1226	0.0193	2.25e-10	--	0	0.456	1	0.4995	823602	356567	TCAP,PNMT,PGAP3	PGAP3	PGAP3	TCAP,ERBB2,GRB7,PNMT,PPP1R1B,PGAP3	T	A	0.325972	0.1329	0.0231703	1.7e-08	0.0246554	7.03419e-08	-	-	T	A	0.3424	0.1061	0.0308	0.000572	0.0311019	0.00064638
17:45054564_A_G	rs12600452	q21.32	17	45054564	1	222	Yes	0	1	1	0	A	G	0.202	0	0.202	0.2021	-0.1747	0.0226	1.072e-14	--	0	0.496	1	0.4814	818079	259462	GOSR2,RPRML	-	-	-	G	A	0.797986	0.186985	0.0268379	3.7e-12	0.0285581	5.84965e-11	-	-	G	A	0.7979	0.1541	0.0366	2.554e-05	0.0369588	3.05251e-05
17:4856376_A_G	rs238238	p13.2	17	4856376	1	252	Yes	0	1	1	0	A	G	0.3069	0.0037	0.3042	0.3118	-0.1676	0.02	4.919e-17	--	0	0.855	1	0.3552	787232	334023	RNF167,PFN1,ENO3,SPAG7	ENO3	ENO3	KIF1C,ENO3,SLC25A11,PFN1,MINK1,SPAG7	A	G	0.304171	-0.153852	0.0234273	1.4e-10	0.0249289	6.75879e-10	-	-	G	A	0.6882	0.1924	0.0331	6.065e-09	0.0334244	8.59948e-09
17:64288637_A_G	rs12948922	q24.2	17	64288637	1	151	Yes	1	1	1	1	A	G	0.1031	0.0068	0.0975	0.1113	0.2089	0.0303	5.413e-12	++	0	0.296	1	0.5865	829182	143775	PRKCA	-	-	PRKCA	G	A	0.902506	-0.19539	0.0368418	4.2e-08	0.0392032	6.22731e-07	-	-	G	A	0.8887	-0.229	0.0473	1.328e-06	0.0477636	1.63128e-06
17:71594243_T_TC	rs149576828	q25.1	17	71594243	0	156	Yes	0	1	1	0	T	TC	0.1882	0.0016	0.1869	0.1902	-0.1575	0.0234	1.637e-11	--	0	0.817	1	0.3659	828771	241538	SDK2	-	-	SDK2	TC	T	0.81306	0.174186	0.0279893	1.3e-10	0.0297833	4.96188e-09	-	-	T	TC	0.1902	-0.1307	0.0374	0.0004665	0.0377666	0.000538712
17:71656034_C_T	rs4789265	q25.1	17	71656034	1	156	Yes	0	1	1	0	T	C	0.0714	0.0027	0.0693	0.0747	-0.2465	0.0355	4.069e-12	--	0	0.926	1	0.3359	824322	105244	SDK2	-	-	SDK2	C	T	0.930741	0.27428	0.0430446	5.9e-11	0.0458036	2.12205e-09	-	-	C	T	0.9253	0.2044	0.0558	0.0002479	0.0563469	0.00028615
17:7372637_C_T	rs12942267	p13.1	17	7372637	1	119	Yes	0	1	1	0	T	C	0.6259	0.0096	0.614	0.6336	-0.1221	0.0186	5.257e-11	--	0	0.333	1	0.5636	835443	382912	ZBTB4	CHRNB1	-	CHRNB1,ZBTB4,POLR2A	C	T	0.366408	0.130729	0.0223937	7.1e-09	0.023829	4.10857e-08	-	-	C	T	0.386	0.1087	0.0295	0.0002239	0.0297892	0.000263285
17:74684080_A_G	rs2286589	q25.1	17	74684080	1	326	Yes	0	1	1	0	A	G	0.4345	0	0.4345	0.4345	0.1869	0.0181	4.844e-25	++	13.7	1.159	1	0.2818	832110	404758	MXRA7	-	-	MXRA7,JMJD6	G	A	0.565485	-0.202415	0.0217412	5.6e-21	0.0231347	2.14484e-18	-	-	G	A	0.5655	-0.1625	0.0287	1.445e-08	0.0289813	2.05791e-08
17:79372489_C_T	rs11657730	q25.3	17	79372489	1	15	Yes	0	1	1	0	T	C	0.3528	0.0021	0.3493	0.3541	-0.1208	0.0207	5.377e-09	--	0	0.02	1	0.8881	728967	297631	TMEM105	-	-	BAHCC1	C	T	0.645912	0.122568	0.0227609	3.4e-08	0.0242198	4.17814e-07	-	-	C	T	0.6507	0.116	0.0395	0.003333	0.0398872	0.00363513
17:949783_A_G	rs751915	p13.3	17	949783	1	122	Yes	0	1	1	0	A	G	0.3527	0.0014	0.3517	0.3546	-0.1284	0.0194	3.422e-11	--	0	0.455	1	0.5001	812104	354379	ABR	-	-	ABR	G	A	0.648257	0.137976	0.02259	1.9e-09	0.0240379	9.47159e-09	-	-	G	A	0.6454	0.1106	0.0324	0.0006512	0.0327176	0.000723685
18:12556646_A_G	rs12964660	p11.21	18	12556646	1	217	Yes	0	1	1	0	A	G	0.5191	0.0026	0.517	0.5224	-0.1382	0.018	1.608e-14	--	0	0.043	1	0.8352	832111	408389	SPIRE1	AP005482.1,SPIRE1	-	SPIRE1	G	A	0.483009	0.141184	0.0216269	1.9e-10	0.0230131	8.51903e-10	-	-	G	A	0.4776	0.1335	0.0286	3.049e-06	0.0288803	3.79102e-06
18:13562149_C_T	rs1284436	p11.21	18	13562149	1	90	Yes	1	1	1	1	T	C	0.5581	0.0053	0.5512	0.5622	-0.118	0.0185	1.838e-10	--	0	0.262	1	0.6087	821941	390644	LDLRAD4	-	-	-	C	T	0.437798	0.110755	0.0218893	4.2e-07	0.0232923	1.98444e-06	-	-	C	T	0.4488	0.1304	0.0302	1.609e-05	0.030496	1.90309e-05
18:20072331_C_T	rs55906209	q11.2	18	20072331	1	314	Yes	0	0	1	0	T	C	0.0559	0.0036	0.0529	0.0602	0.3934	0.0395	2.135e-23	++	74.1	3.866	1	0.04927	830579	85004.9	CTAGE1	-	-	GATA6	C	T	0.9471	-0.457595	0.0481475	4.9e-22	0.0512336	4.20086e-19	-	-	C	T	0.9398	-0.2996	0.0613	1.002e-06	0.0619009	1.29841e-06
18:25690011_C_T	rs1231268	q12.1	18	25690011	0	323	Yes	0	0	1	0	T	C	0.1813	0.0071	0.1756	0.1902	-0.1997	0.0235	1.74e-17	--	0	0.317	1	0.5736	821193	241013	CDH2	-	-	CDH2	T	C	0.175577	-0.210352	0.0282987	3.3e-14	0.0301125	2.83781e-12	-	-	C	T	0.8098	0.1833	0.0371	7.688e-07	0.0374637	9.94406e-07
18:25765493_G_T	rs12455124	q12.1	18	25765493	1	323	Yes	0	0	1	0	T	G	0.7736	0.0017	0.7723	0.7758	0.2186	0.0217	9.089e-24	++	84.3	6.37	1	0.01161	832721	279754	CDH2	-	-	CDH2	T	G	0.772342	0.261012	0.0258342	3.3e-23	0.0274901	2.20686e-21	-	-	G	T	0.2242	-0.1476	0.0352	2.702e-05	0.035545	3.28892e-05
18:26266935_C_G	rs983987	q12.1	18	26266935	0	323	Yes	0	0	1	0	C	G	0.5096	0.0094	0.4976	0.5169	-0.1678	0.0182	3.084e-20	--	80	5.006	1	0.02526	819989	402974	CDH2	-	-	-	G	C	0.483091	0.199578	0.0217042	2.1e-20	0.0230953	5.54895e-18	-	-	G	C	0.5024	0.1156	0.0293	7.742e-05	0.0295872	9.34123e-05
18:30004014_A_G	rs60451418	q12.1	18	30004014	1	181	Yes	0	0	1	0	A	G	0.8409	0.0095	0.8292	0.8486	0.1798	0.025	6.739e-13	++	0	0.793	1	0.3731	837059	213185	GAREM	-	-	FAM59A	A	G	0.848586	0.197953	0.0303118	2.3e-11	0.0322547	8.39936e-10	-	-	G	A	0.1708	-0.1524	0.0393	0.0001036	0.0396852	0.000122924
18:31399844_C_T	rs34146745	q12.1	18	31399844	1	12	Yes	1	1	1	1	T	C	0.3807	0.0021	0.378	0.3824	-0.1073	0.0184	5.797e-09	--	0	0	1	0.9921	835444	389265	NOL4	-	-	-	C	T	0.6176	0.107475	0.0221467	4.7e-07	0.0235662	5.10186e-06	-	-	C	T	0.622	0.1071	0.0293	0.0002553	0.0295872	0.000294821
18:3252130_C_T	rs16944555	p11.31	18	3252130	1	232	Yes	0	1	1	0	T	C	0.8645	0.0054	0.8578	0.8689	0.2088	0.0263	1.789e-15	++	11.8	1.133	1	0.287	837059	191715	MYL12A,MYL12B	-	-	MYL12B	T	C	0.868918	0.231645	0.0318488	3.4e-13	0.0338902	8.19098e-12	-	-	C	T	0.1422	-0.1746	0.0411	2.13e-05	0.0415029	2.58853e-05
18:33925463_A_G	rs1606593	q12.2	18	33925463	0	388	Yes	0	0	1	0	A	G	0.8191	0.0044	0.8136	0.8226	0.1488	0.0235	2.335e-10	++	84.2	6.331	1	0.01187	834401	239110	FHOD3	-	-	-	A	G	0.822634	0.101069	0.0283528	0.0017	0.0301701	0.000808195	-	-	G	A	0.1864	-0.2219	0.037	1.951e-09	0.0373627	2.86621e-09
18:34204629_C_G	rs16968050	q12.2	18	34204629	0	388	Yes	0	0	1	0	C	G	0.1462	0.0014	0.1444	0.1473	0.3267	0.0254	7.328e-38	++	0	0.115	1	0.735	834173	202281	FHOD3	-	-	FHOD3,KIAA1328	G	C	0.852708	-0.333499	0.0303677	3.6e-28	0.0323141	5.69098e-25	-	-	G	C	0.8556	-0.3158	0.0407	8.19e-15	0.0410989	1.54321e-14
18:34261473_A_G	rs151313792	q12.2	18	34261473	0	388	No, not in IC-RHR	0	0	1	0	A	G	0.0051	0.0016	0.0037	0.0069	-1.1543	0.1715	1.693e-11	--	86	7.165	1	0.007435	702926	4605.24	FHOD3	-	FHOD3	-	G	A	0.996309	1.54903	0.212565	1.3e-13	0.22619	7.46953e-12	-	-	G	A	0.9931	0.6204	0.2605	0.01726	0.263053	0.0183511
18:34289285_G_T	rs61735998	q12.2	18	34289285	1	388	Yes	0	0	1	0	T	G	0.0239	0.0002	0.0237	0.024	-0.8382	0.0629	1.535e-40	--	0	0.604	1	0.4369	792317	34887	FHOD3	-	FHOD3	FHOD3,KIAA1328	G	T	0.975956	0.869737	0.0703111	3e-35	0.0748178	3.08526e-31	-	-	G	T	0.9763	0.7624	0.1149	3.305e-11	0.116026	5.00029e-11
18:46324394_C_T	rs12956065	q21.1	18	46324394	1	146	Yes	1	1	1	1	T	C	0.106	0.0009	0.1052	0.1071	0.2012	0.0295	8.632e-12	++	0	0.281	1	0.5961	831660	152955	CTIF	-	-	CTIF	C	T	0.894756	-0.188808	0.0353218	7.5e-08	0.0375858	5.07676e-07	-	-	C	T	0.8929	-0.2209	0.047	2.626e-06	0.0474607	3.2496e-06
18:52982458_C_T	rs893946	q21.2	18	52982458	1	30	Yes	1	1	1	1	T	C	0.3575	0.0012	0.3565	0.359	0.1123	0.0189	2.944e-09	++	0	0.456	1	0.4997	822675	369500	TCF4	-	-	TCF4	C	T	0.643506	-0.122384	0.022638	4.3e-08	0.024089	3.76457e-07	-	-	C	T	0.641	-0.0961	0.0303	0.00151	0.030597	0.00168469
18:58348629_A_G	rs2877570	q21.32	18	58348629	1	34	Yes	0	1	1	0	A	G	0.4933	0.0076	0.4872	0.5028	-0.1062	0.0178	2.58e-09	--	0	0.133	1	0.7156	832111	412717	MC4R	-	-	-	G	A	0.512811	0.111428	0.0214528	6.1e-07	0.0228278	1.05424e-06	-	-	G	A	0.4972	0.0981	0.0283	0.0005318	0.0285774	0.00059742
18:60881155_A_C	rs12957119	q21.33	18	60881155	1	115	Yes	1	1	1	1	A	C	0.8074	0.0006	0.8069	0.8082	-0.1506	0.0231	7.35e-11	--	57.4	2.346	1	0.1256	821716	248307	BCL2	-	-	-	A	C	0.806928	-0.123276	0.0274268	5.3e-06	0.0291847	2.40017e-05	-	-	C	A	0.1918	0.1965	0.0375	1.619e-07	0.0378676	2.11272e-07
18:64227107_A_G	rs540533	q22.1	18	64227107	1	8	Yes	0	1	1	0	A	G	0.8332	0.0109	0.8198	0.8421	0.1428	0.0247	7.086e-09	++	34.4	1.524	1	0.217	834253	219822	CDH19	-	CDH19	CDH19	A	G	0.84214	0.167605	0.0298945	6.4e-08	0.0318106	1.37289e-07	-	-	G	A	0.1802	-0.1054	0.0387	0.006448	0.0390793	0.0069951
18:6747553_A_G	rs6506438	p11.31	18	6747553	1	136	Yes	0	1	1	0	A	G	0.481	0.0013	0.4799	0.4826	-0.122	0.0181	1.754e-11	--	0	0.065	1	0.7992	827368	402637	ARHGAP28	RP11-91I8.3	-	ARHGAP28	A	G	0.479939	-0.1256	0.0216651	2.8e-09	0.0230537	5.08995e-08	-	-	G	A	0.5174	0.1161	0.0291	6.684e-05	0.0293852	7.78372e-05
18:77156174_A_G	rs139536097	q23	18	77156174	1	207	Yes	0	1	1	0	A	G	0.1076	0.0001	0.1075	0.1077	0.2403	0.0317	3.697e-14	++	0	0.003	1	0.9535	800976	135023	NFATC1	-	-	NFATC1	G	A	0.892482	-0.239081	0.0357827	2.1e-11	0.0380762	3.40735e-10	-	-	G	A	0.8923	-0.2431	0.0569	1.971e-05	0.0574577	2.32721e-05
19:11275842_A_G	rs3185010	p13.2	19	11275842	1	260	Yes	0	1	1	0	A	G	0.3206	0.0021	0.3179	0.3222	-0.167	0.0196	1.515e-17	--	38.8	1.635	1	0.201	818134	344504	SPC24,KANK2	-	-	KANK2	G	A	0.677767	0.186049	0.023137	6e-16	0.02462	4.13017e-14	-	-	G	A	0.6821	0.1341	0.032	2.771e-05	0.0323137	3.32552e-05
19:1208399_C_T	rs1978727	p13.3	19	1208399	1	99	No, not in IC-RHR	0	1	1	0	T	C	0.3212	0.003	0.3192	0.3258	-0.1328	0.0207	1.464e-10	--	71.6	3.518	1	0.06072	799237	315688	STK11	-	-	STK11	C	T	0.680755	0.157763	0.0231502	1.3e-11	0.024634	1.5109e-10	-	-	C	T	0.6742	0.0724	0.0379	0.05595	0.0382715	0.0585246
19:17464411_A_G	rs2162889	p13.11	19	17464411	1	180	Yes	0	1	1	0	A	G	0.7117	0.0072	0.7022	0.7171	0.146	0.0203	6.971e-13	++	62.5	2.663	1	0.1027	817840	320385	PLVAP	-	-	NR2F6,DDA1,USHBP1,ANO8,PLVAP	G	A	0.282851	-0.170986	0.023916	1.2e-12	0.0254489	1.83236e-11	-	-	G	A	0.2978	-0.1019	0.0335	0.002363	0.0338284	0.00259306
19:30109533_A_G	rs12986417	q12	19	30109533	1	192	Yes	0	1	1	0	A	G	0.3498	0.0013	0.3482	0.3508	0.1395	0.019	2.115e-13	++	0	0.897	1	0.3436	837061	367469	POP4	-	-	-	G	A	0.64919	-0.15372	0.0227449	1.4e-12	0.0242028	2.13443e-10	-	-	G	A	0.6518	-0.1167	0.0304	0.0001244	0.030698	0.000143792
19:36560620_C_T	rs62109752	q13.12	19	36560620	1	271	Yes	0	1	1	0	T	C	0.11	0.0071	0.1043	0.1188	0.2531	0.0293	5.459e-18	++	0	0.49	1	0.4841	831559	152563	WDR62	CLIP3,POLR2I,TBCB,WDR62	-	-	C	T	0.895706	-0.269567	0.0353009	6.6e-15	0.0375635	7.16267e-13	-	-	C	T	0.8812	-0.2276	0.0463	9.054e-07	0.0467538	1.12705e-06
19:39138608_C_T	rs2303040	q13.2	19	39138608	1	358	Yes	0	1	1	0	T	C	0.5315	0.0135	0.5212	0.5491	0.2153	0.0184	9.571e-32	++	0	0.896	1	0.3438	769180	373351	ACTN4	ACTN4,CAPN12	-	ACTN4	T	C	0.521215	0.228606	0.021739	4.2e-26	0.0231324	4.95748e-23	-	-	C	T	0.4509	-0.1926	0.0299	1.147e-10	0.0301931	1.78312e-10
19:40828500_G_GC	rs79222109	q13.2	19	40828500	1	354	Yes	0	0	1	0	G	GC	0.468	0.0065	0.4598	0.4731	0.2084	0.018	7.047e-31	++	0	0.266	1	0.606	829631	407044	C19orf47	-	-	AKT2,C19orf47,CNTD2	GC	G	0.526874	-0.201003	0.0216559	6.8e-21	0.023044	2.71905e-18	-	-	G	GC	0.4598	0.2201	0.0287	1.814e-14	0.0289813	3.08868e-14
19:45412079_C_T	rs7412	q13.32	19	45412079	1	280	Yes	0	0	1	0	T	C	0.0798	0.0002	0.0796	0.08	0.3128	0.0345	1.102e-19	++	0	0.392	1	0.5311	805138	110971	TOMM40,APOE,APOC1	-	APOE	PVRL2,TOMM40	C	T	0.920034	-0.328076	0.0396602	5.5e-17	0.0422023	7.61074e-15	-	-	C	T	0.9204	-0.2823	0.0591	1.787e-06	0.0596793	2.24206e-06
19:47556375_T_TG	rs61141867	q13.32	19	47556375	1	106	Yes	1	1	1	1	T	TG	0.2711	0.0115	0.2638	0.2892	0.1452	0.0225	1.098e-10	++	0	0	1	0.9944	778337	270162	NPAS1,TMEM160	-	-	-	T	TG	0.263752	0.145148	0.0250538	3.7e-09	0.0266596	5.19559e-08	-	-	T	TG	0.2892	0.1455	0.0416	0.0004737	0.0420078	0.000532908
19:49660889_A_G	rs3760662	q13.33	19	49660889	1	246	Yes	0	1	1	0	A	G	0.5539	0.0025	0.5521	0.5573	0.1537	0.0188	2.602e-16	++	0	0	1	0.995	824949	377810	PPFIA3,HRC,TRPM4	-	-	TRPM4	A	G	0.552072	0.153747	0.0217961	3.8e-13	0.0231931	3.38001e-11	-	-	G	A	0.4427	-0.1535	0.0316	1.215e-06	0.0319097	1.50596e-06
19:5085485_A_G	rs11670830	p13.3	19	5085485	1	220	Yes	0	1	1	0	A	G	0.3442	0.0066	0.3357	0.3493	-0.1487	0.0192	1.106e-14	--	0	0.662	1	0.4159	837061	359745	KDM4B	-	-	KDM4B	G	A	0.650708	0.160772	0.0228422	1.1e-12	0.0243063	3.73013e-11	-	-	G	A	0.6643	0.1284	0.0312	3.846e-05	0.0315058	4.59279e-05
2:101578458_A_G	rs6747755	q11.2	2	101578458	1	334	Yes	0	1	1	0	A	G	0.2384	0.0115	0.2292	0.2526	-0.2241	0.0213	5.943e-26	--	0	0.011	1	0.9165	828434	294119	NPAS2	-	-	NPAS2	G	A	0.770826	0.225859	0.0257006	4e-19	0.0273479	1.47228e-16	-	-	G	A	0.7474	0.2213	0.0335	4.048e-11	0.0338284	6.07636e-11
2:111870220_C_T	rs2289321	q13	2	111870220	1	226	Yes	0	1	1	0	T	C	0.9356	0.0003	0.9352	0.9359	-0.289	0.0372	7.969e-15	--	31.8	1.467	1	0.2258	809800	93640.6	ACOXL,BCL2L11	-	-	BCL2L11	T	C	0.935911	-0.32344	0.0440237	1.5e-13	0.0468454	5.04133e-12	-	-	C	T	0.0648	0.2301	0.0606	0.0001474	0.061194	0.000169796
2:111950594_A_C	rs11123407	q13	2	111950594	0	226	Yes	0	1	1	0	A	C	0.4665	0.005	0.4626	0.473	0.1156	0.0181	1.767e-10	++	62.5	2.668	1	0.1024	817729	400428	BCL2L11	-	-	-	A	C	0.462613	0.138653	0.0215821	6.5e-11	0.0229654	1.56552e-09	-	-	C	A	0.527	-0.0776	0.0292	0.007824	0.0294862	0.00849493
2:11308842_A_G	rs62120155	p25.1	2	11308842	1	196	Yes	1	1	1	1	A	G	0.5416	0.0012	0.5401	0.5426	-0.1339	0.0181	1.528e-13	--	0	0.01	1	0.9221	832113	400957	PQLC3	-	ROCK2	ROCK2	G	A	0.457449	0.135346	0.0217125	2.3e-10	0.0231042	4.68267e-09	-	-	G	A	0.4599	0.1317	0.029	5.527e-06	0.0292843	6.88228e-06
2:135252544_G_GCCTCCCAGGTTCTC	rs141311033	q21.3	2	135252544	1	17	Yes	1	1	1	1	G	GCCTCCCAGGTTCTC	0.4172	0.007	0.4117	0.4262	-0.1084	0.0185	5.083e-09	--	10.9	1.122	1	0.2895	832964	383931	TMEM163	-	-	-	GCCTCCCAGGTTCTC	G	0.588295	0.12382	0.0221706	2.5e-08	0.0235916	1.53369e-07	-	-	G	GCCTCCCAGGTTCTC	0.4262	-0.0834	0.0297	0.004995	0.0299911	0.00542212
2:148360603_C_T	rs13011875	q22.3	2	148360603	1	191	Yes	0	1	1	0	T	C	0.3935	0.0096	0.3858	0.4056	-0.135	0.0185	2.59e-13	--	79.4	4.862	1	0.02746	837061	389451	ACVR2A	-	-	MBD5,ACVR2A	C	T	0.61419	0.167466	0.0221907	4.9e-15	0.023613	1.32091e-12	-	-	C	T	0.5944	0.084	0.0293	0.00418	0.0295872	0.00452458
2:159965140_C_T	rs6714340	q24.2	2	159965140	1	288	Yes	0	0	1	0	T	C	0.1949	0.0001	0.1948	0.195	-0.2115	0.0227	1.09e-20	--	85	6.663	1	0.009842	822825	256455	TANC1	-	-	TANC1	C	T	0.804994	0.25735	0.0270729	6e-21	0.0288082	4.13739e-19	-	-	C	T	0.8052	0.1368	0.0364	0.0001685	0.0367568	0.000197838
2:174014361_C_G	rs4972397	q31.1	2	174014361	1	4	Yes	1	1	1	1	C	G	0.4557	0.0061	0.4508	0.4633	-0.104	0.018	8.023e-09	--	0	0.866	1	0.3519	832113	406923	RAPGEF4	-	-	-	C	G	0.450839	-0.117413	0.0216912	2.9e-08	0.0230815	3.63994e-07	-	-	G	C	0.5367	0.083	0.0286	0.003703	0.0288803	0.00405402
2:175529967_C_G	rs72914576	q31.1	2	175529967	1	148	Yes	0	0	1	0	C	G	0.8147	0.0099	0.8021	0.8225	0.1608	0.0234	6.727e-12	++	52.2	2.093	1	0.148	834403	241077	WIPF1	WIPF1	-	-	C	G	0.822542	0.187677	0.0280855	8.9e-12	0.0298857	3.38935e-10	-	-	G	C	0.1979	-0.118	0.0374	0.001597	0.0377666	0.00178135
2:17681685_A_G	rs1715126	p24.2	2	17681685	1	308	Yes	0	1	1	0	A	G	0.2821	0.0063	0.2771	0.29	0.1973	0.02	5.179e-23	++	0	0.101	1	0.7502	837061	334303	RAD51AP2	-	-	-	G	A	0.722948	-0.202429	0.024073	9.4e-18	0.025616	2.73474e-15	-	-	G	A	0.71	-0.1894	0.0316	2.008e-09	0.0319097	2.92967e-09
2:177109731_A_C	rs973406	q31.1	2	177109731	1	61	Yes	1	1	1	1	A	C	0.2675	0.0048	0.261	0.2711	0.1274	0.0206	6.739e-10	++	23.2	1.303	1	0.2537	810634	311813	MTX2	-	-	-	C	A	0.728913	-0.109785	0.0242484	4.3e-06	0.0258026	2.09236e-05	-	-	C	A	0.739	-0.1589	0.0341	3.16e-06	0.0344342	3.93868e-06
2:179412966_A_G	rs35445420	q31.2	2	179412966	0	476	Yes	0	0	0	0	A	G	0.0274	0.0005	0.0271	0.0281	-0.4089	0.0568	5.849e-13	--	0	0.036	1	0.849	807467	41296.6	TTN	-	-	CCDC141,TTN,SESTD1,PLEKHA3,OSBPL6,-	G	A	0.972919	0.401058	0.0658685	2.3e-09	0.0700904	1.05271e-08	-	-	G	A	0.9719	0.4238	0.0958	9.63e-06	0.096739	1.18213e-05
2:179463446_T_TA	rs3214578	q31.2	2	179463446	0	476	Yes	0	0	0	0	T	TA	0.9693	0.0033	0.9654	0.972	0.4555	0.0536	1.927e-17	++	0	0.162	1	0.6876	826491	46855.6	TTN	-	-	CCDC141,TTN,SESTD1,PLEKHA3,OSBPL6,-	T	TA	0.972029	0.437636	0.0654757	4.5e-12	0.0696724	3.35672e-10	-	-	T	TA	0.9654	0.4815	0.0831	6.823e-09	0.0839145	9.58122e-09
2:179545660_A_T	rs557774221	q31.2	2	179545660	0	476	No, not in IC-RHR	0	0	0	0	A	T	0.0043	0	0.0043	0.0043	1.2566	0.1981	2.265e-10	+?	0	0	0	1	485904	3214.47	TTN	-	-	-	T	A	0.995665	-1.25656	0.186193	1e-11	0.198127	2.26524e-10	-	-	-	-	-	-	-	-	-	-
2:179565068_A_G	rs3850166	q31.2	2	179565068	0	476	Yes	0	0	0	0	A	G	0.9607	0.001	0.96	0.9623	0.4531	0.0499	1.007e-19	++	0	0.149	1	0.6992	811969	54620.6	TTN	-	TTN	-	A	G	0.960033	0.440814	0.0555753	3.8e-15	0.0591374	9.05117e-14	-	-	G	A	0.0377	-0.4833	0.0918	1.387e-07	0.0926998	1.85208e-07
2:179725237_G_T	rs151041685	q31.2	2	179725237	1	476	Yes	0	0	0	0	T	G	0.0872	0.0025	0.0852	0.0903	1.0101	0.0319	2.23e-219	++	37	1.587	1	0.2077	831756	131571	CCDC141	-	CCDC141	CCDC141,TTN,SESTD1,PLEKHA3,OSBPL6,-	G	T	0.914794	-1.04207	0.0383305	6.9e-163	0.0407873	5.65209e-144	-	-	G	T	0.9097	-0.9594	0.0509	2.299e-79	0.0513989	9.40246e-78
2:179839888_A_G	rs10497529	q31.2	2	179839888	0	476	Yes	0	0	0	0	A	G	0.0348	0.0024	0.0311	0.0364	1.0313	0.051	8.98e-91	++	0	0.027	1	0.8692	808445	51278.1	CCDC141	-	CCDC141	CCDC141,TTN,SESTD1,PLEKHA3,OSBPL6,-	G	A	0.963643	-1.03673	0.0571216	1.8e-76	0.0607829	3.13871e-65	-	-	G	A	0.9689	-1.0183	0.0931	7.295e-28	0.0940126	2.4404e-27
2:180049999_C_T	rs12693177	q31.2	2	180049999	0	476	Yes	0	0	0	0	T	C	0.3084	0.0011	0.3075	0.3098	0.1465	0.0194	4.779e-14	++	71.1	3.463	1	0.06274	832640	349228	SESTD1	-	-	-	T	C	0.307537	0.175108	0.0232925	9.3e-14	0.0247855	1.60673e-12	-	-	C	T	0.6902	-0.1008	0.031	0.001133	0.0313039	0.00128168
2:18722424_C_T	rs4832605	p24.2	2	18722424	1	144	Yes	0	1	1	0	T	C	0.4123	0.0053	0.4082	0.419	0.1249	0.0183	8.868e-12	++	0	0.003	1	0.9566	834669	394628	RDH14	-	-	-	T	C	0.40816	0.124154	0.0219523	2.8e-09	0.0233594	1.06681e-07	-	-	C	T	0.581	-0.1262	0.0292	1.553e-05	0.0294862	1.86922e-05
2:188165166_A_G	rs17705966	q32.1	2	188165166	1	409	Yes	0	0	0	0	A	G	0.7962	0.0103	0.7831	0.8043	-0.3326	0.0226	5.28e-49	--	54.7	2.207	1	0.1374	822260	259711	CALCRL	CALCRL	-	-	A	G	0.804338	-0.359132	0.0270768	3.7e-42	0.0288123	1.16552e-35	-	-	G	A	0.2169	0.2901	0.0361	9.119e-16	0.0364539	1.74832e-15
2:191446691_A_C	rs7569128	q32.2	2	191446691	1	182	Yes	0	1	1	0	A	C	0.8177	0.004	0.8146	0.8228	0.1674	0.0233	6.42e-13	++	0	0.485	1	0.4863	821863	242552	TMEM194B	MFSD6	-	-	C	A	0.185373	-0.179894	0.0276402	5.1e-11	0.0294118	9.57225e-10	-	-	C	A	0.1772	-0.1464	0.0377	0.0001031	0.0380695	0.00012026
2:196046543_A_G	rs59522947	q32.3	2	196046543	1	123	Yes	0	1	1	0	A	G	0.8414	0.0034	0.8371	0.8442	-0.1627	0.0245	3.403e-11	--	61.5	2.597	1	0.1071	837061	216837	SLC39A10	-	-	SLC39A10	A	G	0.844163	-0.194508	0.0296002	2.5e-11	0.0314975	6.60141e-10	-	-	G	A	0.1629	0.1135	0.0388	0.003437	0.0391803	0.00376915
2:201159988_A_T	rs295139	q33.1	2	201159988	1	269	Yes	0	1	1	0	A	T	0.4161	0.0034	0.4133	0.4203	0.1562	0.0181	6.2e-18	++	0	0.093	1	0.7602	832640	400422	SPATS2L	-	-	SPATS2L	T	A	0.586662	-0.160627	0.0217856	7.1e-14	0.023182	4.23935e-12	-	-	T	A	0.5797	-0.1493	0.0287	2.008e-07	0.0289813	2.58281e-07
2:203156422_C_T	rs113075198	q33.1	2	203156422	1	109	Yes	0	1	1	0	T	C	0.3118	0.0146	0.3002	0.3303	-0.1266	0.0196	9.584e-11	--	0	0.063	1	0.8024	837061	346657	NOP58	-	-	BMPR2	C	T	0.699757	0.130456	0.0234369	3.5e-09	0.0249391	1.68613e-07	-	-	C	T	0.6697	0.1204	0.0312	0.0001121	0.0315058	0.000132634
2:218699116_C_T	rs2571444	q35	2	218699116	1	92	Yes	0	1	1	0	T	C	0.8713	0.0187	0.8482	0.8864	-0.179	0.0281	1.773e-10	--	0	0.066	1	0.7966	829260	166663	TNS1	-	-	TNS1	T	C	0.886423	-0.173121	0.03395	2.6e-07	0.0361261	1.65014e-06	-	-	C	T	0.1518	0.1879	0.0441	2.053e-05	0.0445323	2.4494e-05
2:219652424_C_CCCTCTTACCTG	rs141407211	q35	2	219652424	0	419	Yes	0	0	1	0	CCCTCTTACCTG	C	0.4155	0.0044	0.4099	0.419	-0.107	0.0182	4.473e-09	--	0	0.019	1	0.8899	832964	395877	CYP27A1	-	STK36	ZNF142,VIL1	C	CCCTCTTACCTG	0.580993	0.105018	0.0219239	8.6e-07	0.0233291	6.74495e-06	-	-	C	CCCTCTTACCTG	0.5901	0.1102	0.029	0.0001443	0.0292843	0.000167811
2:220299541_G_T	rs907683	q35	2	220299541	1	419	Yes	0	0	1	0	T	G	0.5622	0.0024	0.5587	0.5638	-0.3336	0.0196	1.037e-64	--	0	0.592	1	0.4418	835446	350048	DES,SPEG	-	-	DES,OBSL1,SPEG	G	T	0.436199	0.32331	0.0223128	9.1e-49	0.023743	3.16947e-42	-	-	G	T	0.4413	0.3558	0.0346	8.244e-25	0.0349391	2.3515e-24
2:220424706_C_T	rs72957521	q35	2	220424706	0	419	Yes	0	0	1	0	T	C	0.2502	0.0073	0.2406	0.2557	-0.1212	0.021	7.29e-09	--	0	0.392	1	0.5313	837061	301065	TMEM198,OBSL1,INHA	-	OBSL1	-	C	T	0.74428	0.131169	0.0247024	5e-08	0.0262857	6.03407e-07	-	-	C	T	0.7594	0.1039	0.0344	0.002524	0.0347372	0.00278037
2:228179328_C_T	rs59257065	q36.3	2	228179328	1	369	Yes	0	0	1	0	T	C	0.3334	0.0049	0.3294	0.3395	-0.2294	0.0189	6.722e-34	--	0	0.559	1	0.4546	837061	367594	COL4A3	-	-	TM4SF20	C	T	0.670569	0.240885	0.0228791	1.9e-26	0.0243456	4.40182e-23	-	-	C	T	0.6605	0.212	0.0297	1.014e-12	0.0299911	1.56325e-12
2:232264914_G_T	rs13025087	q37.1	2	232264914	1	412	Yes	0	0	0	0	T	G	0.2413	0.0077	0.2351	0.2508	-0.3168	0.0209	9.146e-52	--	72.3	3.611	1	0.05741	832934	301262	B3GNT7	B3GNT7	B3GNT7	-	G	T	0.764919	0.348866	0.0252703	1.2e-42	0.02689	1.72253e-38	-	-	G	T	0.7492	0.2675	0.033	4.804e-16	0.0333235	9.95791e-16
2:233421879_C_T	rs1190443	q37.1	2	233421879	1	139	Yes	1	1	1	1	T	C	0.2472	0.0056	0.2427	0.2541	-0.1399	0.0206	1.186e-11	--	0	0.002	1	0.9621	837061	309022	TIGD1,EIF4E2	EIF4E2	-	CHRND	C	T	0.757307	0.139098	0.0249741	4.5e-08	0.0265748	1.65701e-07	-	-	C	T	0.7459	0.1411	0.0324	1.318e-05	0.0327176	1.61298e-05
2:25082926_C_T	rs11687089	p23.3	2	25082926	1	208	Yes	0	1	1	0	T	C	0.5732	0.0043	0.5698	0.5787	0.1385	0.0183	3.242e-14	++	25.6	1.344	1	0.2463	822825	396283	ADCY3	ADCY3,CENPO,DNAJC27	-	-	T	C	0.569818	0.155079	0.0217922	7.1e-13	0.023189	2.26839e-11	-	-	C	T	0.4213	-0.1115	0.0293	0.0001393	0.0295872	0.000164217
2:26932796_C_T	rs1275923	p23.3	2	26932796	0	414	Yes	0	0	1	0	T	C	0.5921	0.0061	0.5842	0.5969	0.1656	0.0186	6.323e-19	++	7.1	1.077	1	0.2994	835446	384232	KCNK3	AC015977.6	-	KCNK3	C	T	0.403132	-0.180631	0.0221724	6.7e-16	0.0235936	1.91895e-14	-	-	C	T	0.4158	-0.1407	0.0301	2.882e-06	0.030395	3.67356e-06
2:27730940_C_T	rs1260326	p23.3	2	27730940	1	414	Yes	0	0	1	0	T	C	0.3887	0.0008	0.3881	0.3897	0.292	0.0188	1.638e-54	++	24.2	1.319	1	0.2508	800188	373666	GCKR	AC074117.10	GCKR	TRIM54,NRBP1,IFT172,PPM1G	T	C	0.388069	0.308134	0.022056	1.7e-46	0.0234697	2.24561e-39	-	-	C	T	0.6103	-0.2632	0.031	2.04e-17	0.0313039	4.17386e-17
2:28859979_A_G	rs10210444	p23.2	2	28859979	1	104	Yes	0	1	1	0	A	G	0.1935	0.0028	0.1913	0.197	-0.1472	0.0228	1.159e-10	--	56.6	2.305	1	0.129	834403	251399	PLB1	-	-	-	G	A	0.808737	0.174731	0.0274024	1.5e-10	0.0291588	2.0677e-09	-	-	G	A	0.803	0.1035	0.0364	0.004448	0.0367568	0.0048655
2:29383256_G_T	rs3100246	p23.2	2	29383256	0	104	No, not in IC-RHR	0	1	1	0	T	G	0.1477	0.0022	0.1461	0.1506	0.1503	0.0258	5.812e-09	++	68.2	3.147	1	0.07609	808416	196036	CLIP4	-	CLIP4	CLIP4	G	T	0.853878	-0.184897	0.0304075	8.3e-10	0.0323565	1.10111e-08	-	-	G	T	0.8494	-0.0897	0.0424	0.03449	0.0428156	0.0361683
2:37099339_C_T	rs2252032	p22.2	2	37099339	1	201	Yes	0	1	1	0	T	C	0.4844	0.0057	0.4802	0.492	-0.1371	0.0184	1.023e-13	--	0	0.48	1	0.4884	792990	390615	STRN	-	-	STRN	T	C	0.480208	-0.127564	0.0216237	9.8e-09	0.0230097	2.95765e-08	-	-	C	T	0.508	0.1542	0.0305	4.283e-07	0.030799	5.53819e-07
2:46533552_G_T	rs11684885	p21	2	46533552	1	251	Yes	0	1	1	0	T	G	0.42	0.008	0.4136	0.4299	-0.1515	0.0181	5.944e-17	--	0	0.006	1	0.9365	835446	401616	EPAS1	-	-	EPAS1	T	G	0.413612	-0.150345	0.0218467	1.9e-12	0.023247	9.97755e-11	-	-	G	T	0.5701	0.1533	0.0286	8.599e-08	0.0288803	1.10768e-07
2:48011091_C_G	rs3136237	p16.3	2	48011091	1	84	Yes	0	1	1	0	C	G	0.2948	0.0055	0.2905	0.3017	0.1259	0.0198	2.243e-10	++	19.3	1.239	1	0.2656	834403	336110	MSH6,FBXO11	-	-	FBXO11,MSH6	G	C	0.709522	-0.143277	0.023726	2.1e-10	0.0252467	1.38632e-08	-	-	G	C	0.6983	-0.0978	0.0318	0.002065	0.0321117	0.00232202
2:53993487_A_G	rs17045199	p16.2	2	53993487	1	76	No, not in IC-RHR	0	1	1	0	A	G	0.3557	0.0016	0.3536	0.357	0.1184	0.0189	4.038e-10	++	76.9	4.335	1	0.03733	804677	366327	GPR75-ASB3,CHAC2	-	-	PSME4,ASB3	G	A	0.643003	-0.148626	0.0224263	3.6e-11	0.0238637	4.7209e-10	-	-	G	A	0.6464	-0.067	0.0308	0.02941	0.0311019	0.0312238
2:60004832_C_T	rs1442878	p16.1	2	60004832	1	332	Yes	0	0	1	0	T	C	0.3785	0.0038	0.3738	0.3815	0.1939	0.0185	9.585e-26	++	79.4	4.856	1	0.02756	835446	384180	BCL11A	-	-	-	T	C	0.381538	0.226902	0.0223508	7.6e-24	0.0237834	1.42345e-21	-	-	C	T	0.6262	-0.1436	0.0291	7.981e-07	0.0293852	1.02484e-06
2:64882414_C_T	rs12466865	p14	2	64882414	1	171	Yes	0	1	1	0	T	C	0.3538	0.004	0.3484	0.3567	0.1377	0.0194	1.394e-12	++	22	1.283	1	0.2574	837061	350919	SERTAD2	-	-	SERTAD2	C	T	0.643294	-0.121439	0.0227051	8.7e-08	0.0241604	4.99864e-07	-	-	C	T	0.6516	-0.1675	0.0324	2.282e-07	0.0327176	3.06231e-07
2:66349950_C_T	rs17031548	p14	2	66349950	0	235	Yes	0	0	1	0	T	C	0.8061	0.0084	0.7958	0.813	0.1423	0.0226	3.203e-10	++	0	0.416	1	0.5187	832934	257479	MEIS1	-	-	MEIS1	T	C	0.813037	0.130394	0.0274839	2.6e-06	0.0292455	8.24968e-06	-	-	C	T	0.2042	-0.1602	0.0354	6.179e-06	0.035747	7.41215e-06
2:66725062_C_T	rs62144050	p14	2	66725062	1	235	No, not in IC-RHR	0	0	1	0	T	C	0.7179	0.005	0.7157	0.7291	-0.1839	0.0231	1.626e-15	--	88	8.361	1	0.003833	696145	254234	MEIS1	-	-	MEIS1	T	C	0.715686	-0.213589	0.0237409	7.2e-20	0.0252626	2.79678e-17	-	-	C	T	0.2709	0.0337	0.0563	0.5499	0.0568519	0.553336
2:85860228_A_T	rs6547629	p11.2	2	85860228	1	7	Yes	0	1	1	0	A	T	0.6352	0.006	0.6306	0.643	0.11	0.019	7.123e-09	++	0	0.011	1	0.9172	819989	368504	USP39	-	-	VAMP5,USP39	A	T	0.630635	0.108498	0.0224343	1.1e-06	0.0238722	5.49501e-06	-	-	T	A	0.357	-0.1126	0.0311	0.0002908	0.0314048	0.000336517
2:8756183_C_T	rs6730558	p25.1	2	8756183	1	229	Yes	0	1	1	0	T	C	0.3897	0.0029	0.3874	0.3934	-0.1457	0.0184	2.393e-15	--	0	0.033	1	0.856	837061	389094	ID2	-	-	ID2	C	T	0.612607	0.148349	0.0221219	2.2e-11	0.0235398	2.93745e-10	-	-	C	T	0.6066	0.1415	0.0292	1.28e-06	0.0294862	1.59577e-06
2:96826016_A_G	rs1168967	q11.2	2	96826016	1	250	Yes	0	1	1	0	A	G	0.6237	0.0037	0.619	0.6267	-0.1545	0.0185	6.597e-17	--	0	0.918	1	0.3379	835446	386676	DUSP2	ADRA2B,GPAT2,TMEM127	ASTL	-	A	G	0.626675	-0.168566	0.0222084	2.1e-15	0.0236319	9.82077e-13	-	-	G	A	0.381	0.1322	0.0294	6.821e-06	0.0296882	8.46981e-06
20:10660063_G_T	rs6040079	p12.2	20	10660063	1	19	Yes	0	1	1	0	T	G	0.3957	0.0006	0.3952	0.3965	0.1115	0.019	4.354e-09	++	54.8	2.214	1	0.1368	837057	370235	JAG1	-	-	JAG1	G	T	0.604784	-0.0897946	0.0224861	3.2e-05	0.0239274	0.000174871	-	-	G	T	0.6035	-0.1483	0.0309	1.624e-06	0.0312029	2.00652e-06
20:25426173_C_T	rs8116139	p11.21	20	25426173	1	244	Yes	0	1	1	0	T	C	0.0648	0.003	0.0606	0.0669	-0.3027	0.0373	5.128e-16	--	76.7	4.296	1	0.0382	832191	95056.7	GINS1,NINL	-	ABHD12	PYGB	C	T	0.933055	0.357753	0.043052	9.8e-17	0.0458115	5.75303e-15	-	-	C	T	0.9394	0.1939	0.0638	0.002375	0.0644254	0.00261519
20:36696264_C_T	rs117747410	q11.23	20	36696264	0	469	No, not in IC-RHR	0	0	0	0	T	C	0.0262	0.0025	0.0219	0.0276	0.3627	0.0605	2.032e-09	++	0	0.668	1	0.4137	783098	36509.6	RPRD1B	-	-	RPRD1B,CTNNBL1,TTI1	C	T	0.972422	-0.391212	0.0656205	6.5e-10	0.0698265	2.11125e-08	-	-	C	T	0.9781	-0.2769	0.12	0.02099	0.121176	0.0223069
20:36709047_C_T	rs545092644	q11.23	20	36709047	0	469	No, not in IC-RHR	0	0	0	0	T	C	0.0098	0	0.0098	0.0098	-1.0445	0.1271	2.116e-16	-?	0	0	0	1	485904	7873.31	RPRD1B	-	-	-	C	T	0.990202	1.0445	0.119482	1.3e-18	0.12714	2.11575e-16	-	-	-	-	-	-	-	-	-	-
20:36843992_A_G	rs6069234	q11.23	20	36843992	1	469	Yes	0	0	0	0	A	G	0.5384	0.0017	0.537	0.5405	0.5439	0.018	3.87e-201	++	92.9	14.179	1	0.0001662	832109	408788	KIAA1755	KIAA1755	KIAA1755	TGM2	A	G	0.537021	0.598066	0.0216308	1.1e-173	0.0230172	7.63108e-149	-	-	G	A	0.4595	-0.4593	0.0285	1.872e-58	0.0287794	2.45247e-57
20:36880293_C_T	rs74553833	q11.23	20	36880293	0	469	Yes	0	0	0	0	T	C	0.0286	0.001	0.0279	0.0301	0.3714	0.058	1.47e-10	++	15.9	1.188	1	0.2756	812397	39829.4	KIAA1755,BPI	-	-	-	C	T	0.972051	-0.413358	0.0653869	2.5e-10	0.0695779	2.834e-09	-	-	C	T	0.9699	-0.2763	0.1037	0.00773	0.104716	0.00832605
20:39942516_A_G	rs142391093	q12	20	39942516	1	162	Yes	0	0	1	0	A	G	0.767	0.0022	0.7654	0.7699	-0.1528	0.0219	3.056e-12	--	0	0.294	1	0.5878	831658	279552	ZHX3	-	-	-	A	G	0.765377	-0.16179	0.0258025	4.5e-10	0.0274563	3.80098e-09	-	-	G	A	0.2301	0.1371	0.036	0.0001404	0.0363529	0.000162356
20:42939693_C_T	rs148377517	q13.12	20	42939693	1	221	Yes	0	1	1	0	T	C	0.015	0.0005	0.0147	0.0159	0.6369	0.0824	1.083e-14	++	0	0.356	1	0.5506	759368	19368.7	FITM2	-	FITM2	-	C	T	0.98529	-0.6651	0.0892877	3.6e-14	0.0950107	2.55477e-12	-	-	C	T	0.9841	-0.5512	0.1639	0.0007736	0.165507	0.000867269
20:56016072_C_T	rs13039273	q13.31	20	56016072	1	31	Yes	1	1	1	1	T	C	0.5643	0.0012	0.5634	0.5658	-0.1087	0.0183	2.716e-09	--	0	0.017	1	0.8956	827501	396453	RBM38	-	-	RBM38	T	C	0.563405	-0.110536	0.0218239	4.1e-07	0.0232227	1.93765e-06	-	-	C	T	0.4342	0.1056	0.0293	0.0003086	0.0295872	0.000358194
20:57466093_G_T	rs185799410	q13.32	20	57466093	1	257	Yes	0	1	1	0	T	G	0.0271	0.0029	0.0252	0.0314	-0.526	0.0618	1.762e-17	--	0	0.909	1	0.3403	810800	34312.1	GNAS	-	-	GNAS	G	T	0.974815	0.565155	0.0697337	6e-16	0.0742033	2.61048e-14	-	-	G	T	0.9686	0.4372	0.1107	7.887e-05	0.111785	9.18856e-05
20:61164022_C_T	rs4072474	q13.33	20	61164022	1	315	Yes	0	1	1	0	T	C	0.7538	0.0097	0.7413	0.7614	-0.2147	0.0215	1.971e-23	--	65.7	2.916	1	0.0877	807160	288331	C20orf166	-	-	C20orf166-AS1,C20orf166	T	C	0.761379	-0.186191	0.0255835	6.3e-13	0.0272233	7.95258e-12	-	-	C	T	0.2587	0.2621	0.0348	5.2e-14	0.0351411	8.75122e-14
21:18118505_C_T	rs2824020	q21.1	21	18118505	0	318	Yes	0	1	1	0	T	C	0.6439	0.0029	0.6402	0.6462	0.1186	0.0188	2.857e-10	++	0	0.027	1	0.8703	837060	375857	C21orf37	-	-	LINC00478	T	C	0.646247	0.116106	0.0226278	5.3e-07	0.0240781	1.42091e-06	-	-	C	T	0.3598	-0.1224	0.0298	4.041e-05	0.0300921	4.75176e-05
21:18791868_C_G	rs80267658	q21.1	21	18791868	0	318	Yes	0	1	1	0	C	G	0.9134	0.0016	0.9113	0.9147	0.3107	0.0323	6.216e-22	++	0	0.005	1	0.9437	835921	126974	C21orf37	-	-	-	C	G	0.914656	0.312487	0.0386829	6.8e-17	0.0411623	3.16028e-14	-	-	G	C	0.0887	-0.3078	0.0515	2.329e-09	0.0520048	3.24527e-09
21:18915218_A_G	rs2824341	q21.1	21	18915218	1	318	Yes	0	1	1	0	A	G	0.2011	0.0065	0.1958	0.209	0.2256	0.0226	1.689e-23	++	0	0.04	1	0.8424	837060	259842	CXADR	-	-	-	G	A	0.80421	-0.229268	0.0273798	2.7e-17	0.0291347	3.56821e-15	-	-	G	A	0.791	-0.2201	0.0354	5.054e-10	0.035747	7.40601e-10
21:35363759_G_T	rs11088268	q22.11	21	35363759	1	277	Yes	0	1	1	0	T	G	0.8687	0.0042	0.8634	0.872	-0.24	0.027	5.452e-19	--	0	0.649	1	0.4205	818081	183653	ATP5O	-	-	-	T	G	0.872034	-0.257287	0.0323685	5.9e-15	0.0344432	8.02586e-14	-	-	G	T	0.1366	0.2127	0.0429	7.196e-07	0.0433205	9.11158e-07
22:20083500_C_CAGG	rs139814453	q11.21	22	20083500	1	107	Yes	0	1	1	0	CAGG	C	0.8132	0.0039	0.8084	0.8164	-0.1498	0.0232	1.024e-10	--	56.7	2.31	1	0.1285	830303	247463	DGCR8	-	-	ZDHHC8,DGCR8	CAGG	C	0.816354	-0.177975	0.0279007	3e-10	0.029689	2.03936e-09	-	-	C	CAGG	0.1916	0.1058	0.0367	0.003967	0.0370597	0.00430571
22:26160161_C_G	rs133890	q12.1	22	26160161	1	49	Yes	1	1	1	1	C	G	0.5398	0.0027	0.5364	0.542	-0.1104	0.0181	1.156e-09	--	0	0.057	1	0.8109	831316	405118	MYO18B	-	MYO18B	MYO18B	C	G	0.541997	-0.106983	0.0217704	2.5e-07	0.0231658	3.87185e-06	-	-	G	C	0.4636	0.1159	0.0289	5.98e-05	0.0291833	7.14357e-05
22:27910759_A_G	rs11703864	q12.1	22	27910759	0	300	Yes	0	0	1	0	A	G	0.1519	0.0025	0.15	0.1551	0.1554	0.0255	1.077e-09	++	53.6	2.156	1	0.142	806716	202701	MN1	-	-	MN1	G	A	0.850008	-0.126644	0.0302287	2.4e-05	0.0321662	8.24475e-05	-	-	G	A	0.8449	-0.2041	0.0414	8.175e-07	0.0418058	1.04963e-06
22:28181399_C_T	rs2283847	q12.1	22	28181399	1	300	Yes	0	0	1	0	T	C	0.55	0.0034	0.5476	0.5549	-0.1867	0.0194	5.173e-22	--	79.3	4.837	1	0.02786	790940	356333	MN1	-	-	MN1	C	T	0.452389	0.216807	0.022281	3.4e-22	0.0237091	5.99308e-20	-	-	C	T	0.4451	0.1265	0.0332	0.0001415	0.0335254	0.000161131
22:39150543_G_T	rs2072794	q13.1	22	39150543	1	382	Yes	0	0	1	0	T	G	0.2934	0.0023	0.2915	0.2963	-0.2555	0.0198	3.436e-38	--	66.7	3.001	1	0.08323	831397	337624	SUN2	CBY1,DDX17,FAM227A,JOSD1,RP3-508I15.10,RP3-508I15.22,RP3-508I15.9,SUN2,TOMM22	-	DDX17,SUN2,-,GTPBP1,JOSD1	G	T	0.708464	0.282868	0.0237774	4e-33	0.0253014	5.1136e-29	-	-	G	T	0.7037	0.2126	0.0314	1.253e-11	0.0317078	2.01436e-11
3:122069823_A_G	rs80158681	q21.1	3	122069823	1	297	Yes	0	0	1	0	A	G	0.2675	0.0028	0.2652	0.271	0.195	0.0203	6.586e-22	++	88.2	8.462	1	0.003626	837060	322585	CSTA,CCDC58	-	-	KPNA1,FAM162A	G	A	0.734751	-0.24209	0.0243725	1.6e-23	0.0259347	1.01367e-20	-	-	G	A	0.729	-0.1211	0.0322	0.0001677	0.0325156	0.000195809
3:132401421_A_G	rs6792074	q22.1	3	132401421	1	137	Yes	1	1	1	1	A	G	0.2796	0.0088	0.2726	0.2907	0.1376	0.0204	1.608e-11	++	0	0.087	1	0.7676	823036	323022	NPHP3,UBA5	-	-	NPHP3	G	A	0.727428	-0.142391	0.0245153	2.7e-09	0.0260866	4.80471e-08	-	-	G	A	0.7093	-0.13	0.0325	6.286e-05	0.0328186	7.45826e-05
3:141125186_A_G	rs1344674	q23	3	141125186	1	344	Yes	0	1	1	0	A	G	0.5496	0.0007	0.5487	0.5501	-0.2001	0.0182	4.196e-28	--	0	0.623	1	0.4298	821934	401071	ZBTB38	ZBTB38	-	ZBTB38	A	G	0.550108	-0.211338	0.0217056	1.7e-22	0.0230968	5.68897e-20	-	-	G	A	0.4513	0.1817	0.0293	5.488e-10	0.0295872	8.1916e-10
3:142647160_A_G	rs2707977	q23	3	142647160	1	87	Yes	1	1	1	1	A	G	0.2012	0.0003	0.201	0.2016	0.1452	0.0228	2.06e-10	++	72.7	3.666	1	0.05554	829058	255148	PAQR9	-	-	PCOLCE2	A	G	0.200957	0.110805	0.0272935	4.8e-05	0.0290429	0.000136063	-	-	G	A	0.7984	-0.2008	0.0366	4.233e-08	0.0369588	5.53883e-08
3:15496866_C_CA	rs79782405	p25.1	3	15496866	1	210	Yes	0	1	1	0	CA	C	0.7047	0.0013	0.7031	0.7057	0.1529	0.02	2.313e-14	++	0	0.01	1	0.919	832963	330413	COLQ	-	-	COLQ	CA	C	0.705715	0.151296	0.0238544	3e-10	0.0253834	2.51562e-09	-	-	C	CA	0.2969	-0.1555	0.0323	1.444e-06	0.0326166	1.86516e-06
3:156611676_C_T	rs9871817	q25.31	3	156611676	1	240	Yes	0	1	1	0	T	C	0.4183	0.0066	0.4131	0.4267	-0.1466	0.0183	9.73e-16	--	0	0.699	1	0.403	821421	396068	LEKR1	LINC00886	-	-	T	C	0.413081	-0.158652	0.0218841	7.7e-13	0.0232868	9.56079e-12	-	-	C	T	0.5733	0.1273	0.0291	1.224e-05	0.0293852	1.47689e-05
3:156827227_C_T	rs11928162	q25.31	3	156827227	0	240	Yes	0	1	1	0	T	C	0.477	0.0034	0.4744	0.4814	0.1327	0.0183	4.228e-13	++	0	0.349	1	0.5548	829306	392717	CCNL1	-	-	-	C	T	0.525637	-0.124362	0.0217796	8.5e-09	0.0231756	8.04668e-08	-	-	C	T	0.5186	-0.1467	0.0296	7.471e-07	0.0298901	9.20224e-07
3:168881036_A_T	rs9834275	q26.2	3	168881036	1	278	Yes	0	1	1	0	A	T	0.5116	0.0057	0.5071	0.5188	-0.1618	0.0181	3.816e-19	--	0	0.069	1	0.7931	832112	403124	MECOM	-	-	MECOM	A	T	0.507068	-0.157969	0.0217591	6.1e-13	0.0231538	8.94046e-12	-	-	T	A	0.4812	0.1677	0.0287	5.012e-09	0.0289813	7.18738e-09
3:171800256_A_G	rs4894803	q26.31	3	171800256	1	384	Yes	0	1	0	0	A	G	0.6021	0.0045	0.5988	0.6081	-0.2505	0.0189	3.762e-40	--	0	0.37	1	0.5432	805103	370511	FNDC3B	-	-	FNDC3B	A	G	0.598751	-0.259065	0.0221359	6.8e-33	0.0235547	3.88831e-28	-	-	G	A	0.3919	0.2351	0.0313	6.399e-14	0.0316068	1.02011e-13
3:172115590_A_AT	rs63693860	q26.31	3	172115590	0	384	No, not in IC-RHR	0	1	0	0	A	AT	0.7385	0.0006	0.7318	0.7386	-0.2027	0.0264	1.515e-14	--	1.4	1.014	1	0.3139	489754	181570	FNDC3B	-	-	-	AT	A	0.261402	0.200431	0.0248689	2.2e-16	0.0264629	3.61794e-14	-	-	A	AT	0.7318	-0.5167	0.3099	0.09543	0.312938	0.0987125
3:179173224_A_T	rs7634416	q26.33	3	179173224	1	423	Yes	0	0	0	0	A	T	0.7992	0.0084	0.7889	0.806	0.3897	0.0226	1.151e-66	++	0	0.178	1	0.6731	837060	259598	GNB4	AC007620.3,RP11-145M9.4	-	-	A	T	0.806043	0.38186	0.0274472	8.8e-45	0.0292065	4.60532e-39	-	-	T	A	0.2111	-0.4013	0.0353	6.264e-30	0.035646	2.11691e-29
3:183996213_C_T	rs843372	q27.1	3	183996213	1	272	Yes	0	1	1	0	T	C	0.7703	0.0017	0.7681	0.7717	0.1869	0.0214	2.964e-18	++	0	0.031	1	0.8605	835445	289862	EIF2B5,ECE2	-	-	EIF4G1	C	T	0.228316	-0.18387	0.0258158	4.4e-12	0.0274705	2.18096e-11	-	-	C	T	0.2319	-0.1916	0.034	1.796e-08	0.0343333	2.39699e-08
3:18426898_A_C	rs9758869	p24.3	3	18426898	1	275	Yes	0	1	1	0	A	C	0.4111	0.0102	0.4029	0.4239	0.1603	0.0182	1.441e-18	++	60.2	2.515	1	0.1128	835445	397181	TBC1D5,SATB1	-	SATB1	TBC1D5	A	C	0.402929	0.183341	0.0218956	1.8e-17	0.023299	3.57361e-15	-	-	C	A	0.5761	-0.124	0.029	1.888e-05	0.0292843	2.29207e-05
3:185342847_C_T	rs4686666	q27.2	3	185342847	1	228	Yes	0	1	1	0	T	C	0.6493	0.0003	0.649	0.6496	-0.148	0.0187	2.61e-15	--	0	0.58	1	0.4462	834254	376153	SENP2	SENP2	SENP2	SENP2	T	C	0.649551	-0.15944	0.0225186	4e-12	0.0239619	2.8546e-11	-	-	C	T	0.351	0.1302	0.0297	1.126e-05	0.0299911	1.41652e-05
3:187707104_A_C	rs12152545	q27.3	3	187707104	1	39	Yes	1	1	1	1	A	C	0.164	0.001	0.1627	0.1648	-0.1453	0.0243	2.329e-09	--	0	0.805	1	0.3696	834402	223148	LPP	-	-	LPP	C	A	0.835233	0.128163	0.0290729	1.8e-05	0.0309364	3.43097e-05	-	-	C	A	0.8373	0.1731	0.039	9.275e-06	0.0393823	1.1058e-05
3:23146682_C_T	rs6783710	p24.3	3	23146682	1	57	Yes	0	1	1	0	T	C	0.5233	0.0021	0.5207	0.525	-0.1097	0.0179	8.634e-10	--	0	0.07	1	0.7918	832112	410068	UBE2E2	-	-	-	C	T	0.475041	0.113487	0.0215114	7.3e-08	0.0228902	7.12637e-07	-	-	C	T	0.4793	0.1038	0.0284	0.0002612	0.0286784	0.000295228
3:24464955_A_G	rs59212267	p24.2	3	24464955	1	378	Yes	0	1	1	0	A	G	0.2942	0.0012	0.2932	0.2957	-0.2467	0.0197	3.751e-36	--	0	0.136	1	0.7127	837060	340650	THRB	-	-	-	G	A	0.706752	0.252528	0.0236767	2.4e-27	0.0251943	1.20502e-23	-	-	G	A	0.7043	0.2377	0.0311	2.046e-14	0.0314048	3.76407e-14
3:38598669_A_G	rs41312393	p22.2	3	38598669	0	349	No, not in IC-RHR	0	0	1	0	A	G	0.9334	0.0095	0.9218	0.9411	0.2184	0.0377	7.183e-09	++	75.5	4.08	1	0.04338	826858	91746.1	SCN5A	-	-	-	A	G	0.941116	0.280845	0.0458455	1.6e-10	0.048784	8.5669e-09	-	-	G	A	0.0782	-0.1253	0.059	0.03368	0.0595783	0.0354558
3:38621237_C_G	rs41312411	p22.2	3	38621237	0	349	Yes	0	0	1	0	C	G	0.8529	0.0014	0.8519	0.8547	0.2768	0.0257	4.36e-27	++	85.5	6.903	1	0.008603	824337	196481	SCN5A	-	-	SCN5A	C	G	0.851851	0.328857	0.030489	4.3e-27	0.0324432	3.80931e-24	-	-	G	C	0.1453	-0.1894	0.0416	5.418e-06	0.0420078	6.5229e-06
3:38665823_A_G	rs7638275	p22.2	3	38665823	0	349	Yes	0	0	1	0	A	G	0.0195	0.0012	0.0186	0.0211	0.5493	0.0686	1.15e-15	++	30.8	1.444	1	0.2295	794017	27902.1	SCN5A	-	-	SCN5A	A	G	0.0186348	0.611412	0.0806868	6.2e-14	0.0858585	1.07023e-12	-	-	G	A	0.9789	-0.4399	0.1129	9.73e-05	0.114007	0.000114063
3:38684835_C_G	rs7427574	p22.2	3	38684835	0	349	Yes	0	0	1	0	C	G	0.8035	0.0011	0.8021	0.8044	0.2357	0.0227	3.654e-25	++	55.2	2.23	1	0.1354	837060	253203	SCN5A	-	-	SCN5A	C	G	0.804354	0.262475	0.0272122	3.1e-22	0.0289564	1.25185e-19	-	-	G	C	0.1979	-0.1926	0.0364	1.203e-07	0.0367568	1.60709e-07
3:38778540_C_T	rs11711941	p22.2	3	38778540	1	349	Yes	0	0	1	0	T	C	0.4157	0.0109	0.4071	0.4296	-0.2021	0.0183	2.66e-28	--	72.1	3.589	1	0.05815	835445	394323	SCN10A	-	SCN10A	-	T	C	0.40712	-0.229485	0.0219249	3.8e-25	0.0233302	7.8473e-23	-	-	C	T	0.5704	0.1581	0.0293	6.602e-08	0.0295872	9.1155e-08
3:42791123_A_G	rs339682	p22.1	3	42791123	1	27	Yes	0	1	1	0	A	G	0.2473	0.003	0.2434	0.2495	0.1242	0.021	3.457e-09	++	0	0.681	1	0.4092	814134	300048	CCDC13,HIGD1A	-	KLHL40	-	A	G	0.24954	0.110939	0.0248508	8.4e-06	0.0264436	2.7251e-05	-	-	G	A	0.7566	-0.1469	0.0343	1.833e-05	0.0346362	2.22302e-05
3:47875324_A_G	rs34249203	p21.31	3	47875324	1	170	Yes	0	1	1	0	A	G	0.3346	0.0068	0.3293	0.3433	-0.1347	0.0191	1.765e-12	--	25	1.333	1	0.2482	832639	362197	DHX30	-	MAP4	PRKAR2A,MYL3,MAP4,DAG1,KLHDC8B,LAMB2,RAD54L2,SETD2,GNAI2,ARIH2,PTPN23,SMARCC1,RBM5,QRICH1,C3orf54,SEMA3F,TMEM115,RHOA,WDR6,USP4,RBM15B,NBEAL2,UQCRC1,SLC26A6,USP19,KLHL18,RNF123,PLXNB1,VPRBP,COL7A1,PFKFB4,PTH1R,RBM6,C3orf45,IFRD2,-	A	G	0.329272	-0.151979	0.0228231	7.6e-12	0.024286	3.90211e-10	-	-	G	A	0.6567	0.1066	0.0306	0.0004964	0.0308999	0.000560909
3:49582123_C_CA	rs145933528	p21.31	3	49582123	1	373	Yes	0	0	1	0	CA	C	0.2165	0.0057	0.212	0.2238	-0.2768	0.0221	5.442e-36	--	0	0	1	0.9895	827792	270485	DAG1,BSN	AMT,DALRD3,GPX1,NICN1,P4HTM,QRICH1,RP13-131K19.6	DALRD3	PRKAR2A,MYL3,MAP4,DAG1,KLHDC8B,LAMB2,RAD54L2,SETD2,GNAI2,ARIH2,PTPN23,SMARCC1,RBM5,QRICH1,C3orf54,SEMA3F,TMEM115,RHOA,WDR6,USP4,RBM15B,NBEAL2,UQCRC1,SLC26A6,USP19,KLHL18,RNF123,PLXNB1,VPRBP,COL7A1,PFKFB4,PTH1R,RBM6,C3orf45,IFRD2,-	C	CA	0.787966	0.276602	0.0263815	6.4e-27	0.0280724	6.6429e-23	-	-	C	CA	0.7762	0.2772	0.0355	5.899e-15	0.035848	1.05326e-14
3:50814442_C_T	rs2262811	p21.2	3	50814442	1	36	Yes	0	1	1	0	T	C	0.0151	0.0011	0.0144	0.0167	0.4804	0.0805	2.41e-09	++	0	0.017	1	0.8966	779547	20358	DOCK3	-	-	-	C	T	0.985616	-0.48749	0.0915313	6.2e-08	0.0973981	5.58245e-07	-	-	C	T	0.9833	-0.465	0.1416	0.001025	0.142988	0.00114587
3:53086857_G_GA	rs147140565	p21.1	3	53086857	0	357	Yes	0	0	1	0	G	GA	0.0993	0.0013	0.0983	0.1009	-0.2496	0.0303	1.672e-16	--	38.6	1.629	1	0.2019	832829	147444	SFMBT1	-	-	-	GA	G	0.9017	0.279742	0.0361012	4.5e-15	0.0384151	3.28719e-13	-	-	G	GA	0.1009	-0.2001	0.0487	3.938e-05	0.0491774	4.72263e-05
3:53398568_A_G	rs79193219	p21.1	3	53398568	1	357	Yes	0	0	1	0	A	G	0.3506	0.0058	0.3433	0.3552	-0.2183	0.0188	4.523e-31	--	0	0.052	1	0.8204	837060	373223	DCP1A	TKT	-	DCP1A	G	A	0.644843	0.214899	0.0224924	2.6e-23	0.0239341	2.73759e-19	-	-	G	A	0.6567	0.2237	0.0302	1.186e-13	0.030496	2.21087e-13
3:53679833_C_G	rs76697148	p21.1	3	53679833	0	357	Yes	0	0	1	0	C	G	0.9802	0.0042	0.9754	0.9838	0.4512	0.0686	4.784e-11	++	0	0.28	1	0.5964	825531	27661.8	CACNA1D	-	-	DCP1A	C	G	0.983839	0.482542	0.0851395	3.4e-09	0.0905966	1.00249e-07	-	-	G	C	0.0246	-0.4091	0.104	8.415e-05	0.105019	9.80083e-05
3:56382661_G_T	rs13080589	p14.3	3	56382661	1	202	Yes	1	1	1	1	T	G	0.3087	0.0094	0.2967	0.316	0.1443	0.0193	8.259e-14	++	66.4	2.98	1	0.08428	837060	353163	ERC2	-	-	-	G	T	0.683989	-0.118105	0.0230858	3.2e-07	0.0245655	1.52632e-06	-	-	G	T	0.7033	-0.1868	0.031	1.664e-09	0.0313039	2.41189e-09
3:58268793_A_G	rs1554123	p14.3	3	58268793	1	118	Yes	1	1	1	1	A	G	0.5275	0.0019	0.526	0.5299	-0.1188	0.0181	5.581e-11	--	41.7	1.715	1	0.1903	824533	403721	ABHD6	-	-	-	A	G	0.525959	-0.10008	0.0216777	3.2e-06	0.0230672	1.43369e-05	-	-	G	A	0.4701	0.1489	0.029	2.942e-07	0.0292843	3.68318e-07
3:66495477_C_T	rs12491321	p14.1	3	66495477	1	195	Yes	0	1	1	0	T	C	0.1685	0.0017	0.1671	0.1706	-0.1777	0.0241	1.708e-13	--	27.2	1.373	1	0.2412	832933	225506	LRIG1	-	-	-	C	T	0.832932	0.200856	0.029287	8.8e-12	0.0311642	1.1553e-10	-	-	C	T	0.8294	0.1432	0.0377	0.0001464	0.0380695	0.000168872
3:69402923_G_T	rs6762186	p14.1	3	69402923	1	351	Yes	0	0	1	0	T	G	0.6796	0.0064	0.6716	0.6848	-0.2211	0.0193	1.897e-30	--	0	0.751	1	0.3862	837060	358150	FRMD4B	-	-	-	T	G	0.684765	-0.23458	0.023281	4.3e-26	0.0247732	2.82271e-21	-	-	G	T	0.3284	0.2004	0.0304	4.676e-11	0.030698	6.66017e-11
3:69845508_A_T	rs6549251	p14.1	3	69845508	0	351	Yes	0	0	1	0	A	T	0.5879	0.0039	0.583	0.591	-0.1473	0.0184	1.234e-15	--	66.5	2.984	1	0.0841	835445	392070	MITF	-	-	MITF	A	T	0.590958	-0.12189	0.0221529	1.3e-08	0.0235728	2.33109e-07	-	-	T	A	0.417	0.1871	0.0292	1.405e-10	0.0294862	2.21938e-10
3:71339355_G_T	rs1733511	p13	3	71339355	1	116	Yes	1	1	1	1	T	G	0.4738	0.0053	0.4669	0.4778	0.1195	0.0183	6.537e-11	++	0	0.044	1	0.8348	832112	396105	FOXP1	-	-	FOXP1	G	T	0.522152	-0.116602	0.0217153	1.5e-07	0.0231072	4.50822e-07	-	-	G	T	0.5331	-0.1245	0.0297	2.717e-05	0.0299911	3.30695e-05
3:73261000_C_G	rs901340	p13	3	73261000	1	167	Yes	0	1	1	0	C	G	0.4839	0.0053	0.4797	0.4905	-0.1265	0.018	1.975e-12	--	0	0.526	1	0.4683	832112	405576	PPP4R2	-	-	-	C	G	0.479719	-0.136864	0.0215867	1.6e-10	0.0229703	2.54878e-09	-	-	G	C	0.5095	0.1101	0.0286	0.0001189	0.0288803	0.000137689
3:85451194_A_C	rs62250661	p12.1	3	85451194	1	143	No, not in IC-RHR	0	1	1	0	A	C	0.474	0.0054	0.4699	0.481	0.1251	0.0184	1.017e-11	++	83.9	6.206	1	0.01273	832112	393293	CADM2	-	-	-	C	A	0.530119	-0.16005	0.0217363	1.2e-13	0.0231295	4.52497e-12	-	-	C	A	0.519	-0.0651	0.03	0.03016	0.0302941	0.0316395
3:8603243_C_T	rs165177	p26.1	3	8603243	1	274	Yes	0	1	1	0	T	C	0.253	0.0022	0.2513	0.2559	-0.1864	0.0212	1.509e-18	--	0	0.926	1	0.3358	808934	293800	LMCD1	-	-	LMCD1,LINC00312	T	C	0.251269	-0.170975	0.0250036	2.1e-12	0.0266062	1.30896e-10	-	-	C	T	0.7441	0.2134	0.0348	8.271e-10	0.0351411	1.25809e-09
3:99981943_C_G	rs12631115	q12.1	3	99981943	1	70	Yes	1	1	1	1	C	G	0.249	0.0037	0.2461	0.2536	-0.1291	0.0207	4.685e-10	--	0	0.033	1	0.8567	837060	308766	TBC1D23	-	-	-	G	C	0.753939	0.126124	0.0249229	1.5e-06	0.0265204	1.97718e-06	-	-	G	C	0.7464	0.1338	0.0329	4.674e-05	0.0332225	5.63987e-05
4:1224811_A_G	rs4974574	p16.3	4	1224811	1	177	Yes	0	1	1	0	A	G	0.596	0.0012	0.5944	0.5969	0.1325	0.0186	1.047e-12	++	0	0.999	1	0.3177	805719	383105	CTBP1	-	-	CTBP1,MAEA	A	G	0.596944	0.146702	0.0220065	5.3e-12	0.023417	3.73405e-10	-	-	G	A	0.4056	-0.1082	0.0303	0.0003542	0.030597	0.000405782
4:122687491_C_G	rs4833772	q27	4	122687491	1	157	Yes	1	1	1	1	C	G	0.5144	0.0045	0.5087	0.518	0.1247	0.018	4.066e-12	++	51.3	2.054	1	0.1518	830580	407648	TMEM155	-	-	TMEM155	G	C	0.482032	-0.104076	0.0216421	4.6e-06	0.0230293	6.20467e-06	-	-	G	C	0.4913	-0.1569	0.0285	3.818e-08	0.0287794	4.98556e-08
4:148974582_G_T	rs144870889	q31.23	4	148974582	0	377	No, not in IC-RHR	0	0	1	0	T	G	0.0036	0.0004	0.0034	0.0048	1.1605	0.1945	2.417e-09	++	0	0.282	1	0.5954	552670	3372.36	ARHGAP10	-	-	-	G	T	0.996551	-1.19369	0.191977	2.2e-10	0.204282	5.11626e-09	-	-	G	T	0.9952	-0.8391	0.6296	0.1826	0.635771	0.186897
4:148974602_C_T	rs6845865	q31.23	4	148974602	1	377	Yes	0	0	1	0	T	C	0.8263	0.0113	0.8115	0.8349	0.3098	0.0247	4.141e-36	++	81.9	5.528	1	0.01871	792521	218508	ARHGAP10	-	-	ARHGAP10	T	C	0.834934	0.354181	0.0291991	5.7e-35	0.0310706	4.21894e-30	-	-	C	T	0.1885	-0.2338	0.0403	6.8e-09	0.040695	9.1826e-09
4:149024481_C_T	rs11725517	q31.23	4	149024481	0	377	Yes	0	0	1	0	T	C	0.5079	0.0031	0.5041	0.5104	-0.1426	0.0179	1.48e-15	--	84.4	6.402	1	0.0114	832112	412204	NR3C2	-	-	NR3C2	T	C	0.51037	-0.178871	0.0215293	7.6e-17	0.0229092	5.81899e-15	-	-	C	T	0.4959	0.0862	0.0283	0.002285	0.0285774	0.00255821
4:149230732_G_GA	rs34026733	q31.23	4	149230732	0	377	Yes	0	0	1	0	G	GA	0.2313	0.0105	0.2231	0.2447	-0.2241	0.0219	1.619e-24	--	0	0.537	1	0.4638	832963	278597	NR3C2	-	-	-	G	GA	0.223053	-0.236754	0.0262302	4.6e-20	0.0279114	2.20736e-17	-	-	G	GA	0.2447	-0.2037	0.0351	6.258e-09	0.035444	9.07945e-09
4:154385925_C_G	rs7687559	q31.3	4	154385925	1	66	No, not in IC-RHR	0	1	1	0	C	G	0.4081	0.0008	0.4074	0.4091	0.1137	0.0184	6.166e-10	++	81.1	5.279	1	0.02158	835445	392524	KIAA0922	-	-	-	G	C	0.592553	-0.14733	0.0220832	7.9e-12	0.0234986	3.61688e-10	-	-	G	C	0.5909	-0.0607	0.0292	0.03771	0.0294862	0.0395336
4:159856739_C_T	rs2068625	q32.1	4	159856739	1	142	Yes	0	1	1	0	T	C	0.2918	0.0024	0.2887	0.2936	-0.1355	0.02	1.137e-11	--	60.7	2.544	1	0.1107	821973	333505	C4orf45	-	-	-	T	C	0.293585	-0.159951	0.023664	6.2e-12	0.0251808	2.12381e-10	-	-	C	T	0.7113	0.0941	0.0324	0.003671	0.0327176	0.00402585
4:169687725_G_T	rs7696431	q32.3	4	169687725	1	325	Yes	0	1	1	0	T	G	0.5118	0.0029	0.5082	0.5142	-0.1825	0.018	3.024e-24	--	0	0.617	1	0.4322	832112	408364	PALLD	-	-	PALLD	T	G	0.514165	-0.193732	0.0216023	3.5e-20	0.0229869	3.51851e-17	-	-	G	T	0.4918	0.1648	0.0285	7.422e-09	0.0287794	1.02628e-08
4:174584663_C_G	rs17059668	q34.1	4	174584663	1	135	Yes	0	1	1	0	C	G	0.908	0.011	0.8942	0.9167	0.2212	0.0329	1.768e-11	++	0.8	1.008	1	0.3153	832183	120998	HAND2	-	-	-	C	G	0.91675	0.247534	0.0395552	4.7e-10	0.0420905	4.07817e-09	-	-	G	C	0.1058	-0.1798	0.0522	0.0005732	0.0527117	0.000647228
4:18017730_C_T	rs6830062	p15.31	4	18017730	1	5	Yes	0	1	1	0	T	C	0.8276	0.007	0.8182	0.8327	-0.1426	0.0247	7.749e-09	--	0	0.152	1	0.6964	792731	215074	LCORL	-	-	-	T	C	0.832726	-0.135472	0.0289311	4.5e-06	0.0307855	1.07993e-05	-	-	C	T	0.1818	0.1556	0.041	0.0001456	0.0414019	0.000171083
4:23797961_G_GAGAA	rs200996785	p15.2	4	23797961	0	401	Yes	0	0	1	0	G	GAGAA	0.0147	0.0007	0.0135	0.0151	-0.6214	0.0802	9.393e-15	--	0	0.056	1	0.8123	773835	19988.8	PPARGC1A	-	-	PPARGC1A	GAGAA	G	0.984882	0.609399	0.0889899	2.8e-11	0.0946938	1.23092e-10	-	-	G	GAGAA	0.0135	-0.6517	0.1494	1.286e-05	0.150864	1.5619e-05
4:23951018_C_G	rs12501032	p15.2	4	23951018	1	401	Yes	0	0	1	0	C	G	0.6984	0.0048	0.6948	0.7048	-0.2888	0.0201	1.323e-46	--	67.4	3.066	1	0.07996	811123	328001	PPARGC1A	-	-	PPARGC1A	C	G	0.694841	-0.314929	0.0235662	2.7e-42	0.0250767	3.56441e-36	-	-	G	C	0.2952	0.2412	0.0335	5.778e-13	0.0338284	1.00288e-12
4:6299914_A_G	rs4234731	p16.1	4	6299914	1	79	Yes	0	1	1	0	A	G	0.4015	0.0015	0.3996	0.4027	-0.1155	0.0184	3.266e-10	--	62.8	2.685	1	0.1013	832118	392632	WFS1	-	-	WFS1	A	G	0.402686	-0.139476	0.022077	7.2e-10	0.023492	2.90004e-09	-	-	G	A	0.6004	0.0777	0.0292	0.007683	0.0294862	0.00841052
4:83251758_C_CA	rs560944059	q21.22	4	83251758	0	188	No, not in IC-RHR	0	1	1	0	CA	C	0.1899	0.0037	0.0194	0.19	0.1884	0.0308	9.706e-10	+-	0	0.38	1	0.5374	488644	133900	HNRNPD	-	-	-	C	CA	0.80998	-0.188768	0.0289581	4.9e-11	0.0308142	9.01113e-10	-	-	C	CA	0.9806	0.6967	1.4213	0.624	1.43523	0.627374
4:83274799_A_G	rs3944	q21.22	4	83274799	1	188	Yes	0	1	1	0	A	G	0.7805	0.0025	0.7773	0.7825	-0.1594	0.0218	2.994e-13	--	72	3.571	1	0.05881	823477	278378	HNRNPD	-	-	HNRNPD	A	G	0.782465	-0.191551	0.0260309	1.2e-13	0.0276994	4.66693e-12	-	-	G	A	0.2227	0.1064	0.0352	0.002502	0.035545	0.002759
4:95591976_C_G	rs998071	q22.3	4	95591976	1	18	Yes	0	1	1	0	C	G	0.6528	0.0002	0.6526	0.6529	-0.1114	0.019	4.362e-09	--	0	0.825	1	0.3638	820260	367345	PDLIM5	-	-	PDLIM5	C	G	0.652922	-0.124919	0.0226538	2.4e-08	0.0241058	2.19389e-07	-	-	G	C	0.3474	0.0894	0.0305	0.003365	0.030799	0.00369966
5:111096426_C_G	rs255899	q22.1	5	111096426	1	149	Yes	0	1	1	0	C	G	0.7978	0.0077	0.7878	0.8038	0.159	0.0232	6.705e-12	++	72.2	3.595	1	0.05794	818522	248084	NREP	-	-	C5orf13	C	G	0.803761	0.192967	0.0275195	8.9e-13	0.0292834	4.40891e-11	-	-	G	C	0.2122	-0.1022	0.0375	0.006421	0.0378676	0.00695735
5:121866990_C_T	rs4836027	q23.2	5	121866990	0	294	Yes	0	1	1	0	T	C	0.6775	0.0082	0.6674	0.6841	-0.1141	0.0194	3.912e-09	--	0	0.104	1	0.7465	837061	354183	SNCAIP	-	-	-	T	C	0.68412	-0.119194	0.0234803	1.2e-07	0.0249853	1.83708e-06	-	-	C	T	0.3326	0.1064	0.0304	0.0004695	0.030698	0.000528212
5:122692653_G_GT	rs34984032	q23.2	5	122692653	1	294	Yes	0	1	1	0	G	GT	0.5358	0.0004	0.5355	0.5363	-0.172	0.0179	7.553e-22	--	0	0.279	1	0.5974	829631	410182	CEP120	-	CEP120	CEP120	G	GT	0.535517	-0.17959	0.0215479	1.5e-17	0.022929	4.78535e-15	-	-	G	GT	0.5363	-0.1602	0.0284	1.597e-08	0.0286784	2.32238e-08
5:128228602_A_G	rs9327498	q23.3	5	128228602	1	205	Yes	0	1	1	0	A	G	0.7721	0.0001	0.772	0.7722	-0.1604	0.0212	4.451e-14	--	63.8	2.762	1	0.0965	835446	290574	SLC27A6	-	-	SLC27A6	G	A	0.227772	0.188733	0.0256133	4.7e-13	0.027255	4.36871e-12	-	-	G	A	0.228	0.1164	0.0336	0.0005291	0.0339293	0.000602118
5:136431043_C_T	rs10052528	q31.2	5	136431043	0	404	Yes	0	1	1	0	T	C	0.651	0.0055	0.6466	0.6578	0.1099	0.0188	4.612e-09	++	0	0.109	1	0.7417	834003	372284	SPOCK1	-	-	SPOCK1	T	C	0.646598	0.114866	0.0225858	8.2e-08	0.0240335	1.75801e-06	-	-	C	T	0.3422	-0.1022	0.0297	0.0005752	0.0299911	0.000655188
5:137351159_A_C	rs113331339	q31.2	5	137351159	1	404	Yes	0	0	1	0	A	C	0.8267	0.0018	0.8252	0.829	0.3389	0.0236	1.009e-46	++	0	0.942	1	0.3318	834403	236717	FAM13B	RP11-325L7.2,RP11-381K20.5	-	FAM13B,MYOT,NPY6R,KDM3B,KLHL3,HNRNPA0,FAM53C	A	C	0.825237	0.357053	0.0283273	1.9e-36	0.030143	2.27552e-32	-	-	C	A	0.171	-0.31	0.0376	1.717e-16	0.0379686	3.22365e-16
5:137397539_C_CT	rs558603927	q31.2	5	137397539	0	404	No, not in IC-RHR	0	0	1	0	CT	C	0.6957	0.0017	0.676	0.6959	-0.1637	0.027	1.286e-09	-+	28.1	1.391	1	0.2383	489754	175221	FAM13B	-	PKD2L2	-	C	CT	0.304137	0.166444	0.0254409	5.1e-11	0.0270716	7.83187e-10	-	-	C	CT	0.324	-0.203	0.3091	0.5114	0.31213	0.515453
5:142402669_C_T	rs12187598	q31.3	5	142402669	0	328	Yes	0	1	1	0	T	C	0.2972	0.001	0.2964	0.2984	-0.1692	0.0199	1.587e-17	--	83.2	5.942	1	0.01479	835446	337117	ARHGAP26	-	-	ARHGAP26	T	C	0.296356	-0.207844	0.023883	5.4e-18	0.0254138	2.8766e-16	-	-	C	T	0.7016	0.1086	0.0315	0.0005586	0.0318088	0.000639805
5:142708734_C_T	rs33381	q31.3	5	142708734	1	328	Yes	0	1	1	0	T	C	0.8425	0.0044	0.839	0.8482	-0.2556	0.0246	2.964e-25	--	0	0.001	1	0.9812	835415	217067	NR3C1	-	-	NR3C1	T	C	0.83905	-0.255102	0.0292582	1.5e-18	0.0311335	2.531e-16	-	-	C	T	0.1518	0.2563	0.0398	1.134e-10	0.0401901	1.80367e-10
5:146255046_C_T	rs319216	q32	5	146255046	1	60	Yes	1	1	1	1	T	C	0.835	0.0146	0.8177	0.8472	0.1525	0.0247	7.1e-10	++	0	0.143	1	0.7049	837061	216463	PPP2R2B	-	-	-	T	C	0.84723	0.160411	0.03042	7.3e-07	0.0323698	7.21161e-07	-	-	C	T	0.1823	-0.1414	0.038	0.0001991	0.0383725	0.000228763
5:147932822_C_G	rs1363545	q32	5	147932822	1	117	Yes	0	1	1	0	C	G	0.4688	0.0042	0.4655	0.4742	0.1195	0.0183	5.878e-11	++	0	0.449	1	0.5029	835446	398418	HTR4	-	-	-	C	G	0.465478	0.109916	0.0217961	9.4e-07	0.0231931	2.14606e-06	-	-	G	C	0.5258	-0.1351	0.0293	3.859e-06	0.0295872	4.9673e-06
5:154713583_A_G	rs62379806	q33.2	5	154713583	1	98	Yes	1	1	1	1	A	G	0.8537	0.0062	0.8462	0.8589	-0.1623	0.0254	1.603e-10	--	34.2	1.52	1	0.2177	837061	207557	KIF4B	-	-	-	A	G	0.858863	-0.136474	0.0309001	1.2e-05	0.0328807	3.31627e-05	-	-	G	A	0.1538	0.2002	0.0395	4.102e-07	0.0398872	5.18988e-07
5:166389709_G_T	rs384227	q34	5	166389709	1	105	Yes	1	1	1	1	T	G	0.7476	0.0008	0.7466	0.7482	-0.1355	0.021	1.157e-10	--	0	0.44	1	0.507	807335	298487	TENM2	-	-	ODZ2	T	G	0.748214	-0.124879	0.0248746	3.9e-07	0.026469	2.38243e-06	-	-	G	T	0.2534	0.1538	0.0343	7.428e-06	0.0346362	8.97751e-06
5:170712474_C_T	rs74402020	q35.1	5	170712474	1	48	Yes	1	1	1	1	T	C	0.1423	0.001	0.1416	0.1436	0.158	0.0261	1.336e-09	++	0	0.285	1	0.5938	834403	192577	RANBP17	-	-	-	C	T	0.858421	-0.168802	0.031001	8.7e-08	0.032988	3.10323e-07	-	-	C	T	0.8564	-0.1401	0.0421	0.0008774	0.0425127	0.000982506
5:172670745_G_T	rs6891790	q35.1	5	172670745	1	411	Yes	0	0	0	0	T	G	0.3069	0.0143	0.2957	0.3252	-0.2983	0.0201	4.773e-50	--	0	0.315	1	0.5749	820428	330501	NKX2-5	-	-	NKX2-5,C5orf41	G	T	0.704275	0.289505	0.0238918	8.3e-33	0.0254232	4.82922e-30	-	-	G	T	0.6748	0.3127	0.0323	3.698e-22	0.0326166	9.05589e-22
5:173390382_C_T	rs6875935	q35.2	5	173390382	0	411	Yes	0	0	0	0	T	C	0.6262	0.0034	0.6218	0.6289	-0.1359	0.0189	7.217e-13	--	0	0.096	1	0.7563	806520	369050	CPEB4	-	-	CPEB4	C	T	0.371142	0.140451	0.022487	2.1e-09	0.0239283	4.36703e-09	-	-	C	T	0.3782	0.1283	0.0307	2.999e-05	0.0310009	3.49452e-05
5:175709405_A_G	rs13176953	q35.2	5	175709405	1	88	Yes	0	1	1	0	A	G	0.5866	0.0132	0.5682	0.5961	0.1207	0.019	1.989e-10	++	0	0.932	1	0.3342	813390	371475	SIMC1	-	-	C5orf25,KIAA1191	G	A	0.403915	-0.133862	0.0219529	6.8e-10	0.02336	1.00196e-08	-	-	G	A	0.4318	-0.0952	0.0322	0.003118	0.0325156	0.00341344
5:30896358_A_C	rs1921102	p13.3	5	30896358	1	289	Yes	0	0	1	0	A	C	0.4178	0.0026	0.4157	0.4211	0.1691	0.0181	9.222e-21	++	0	0.232	1	0.6297	832640	402058	CDH6	-	-	-	A	C	0.415675	0.176088	0.0217744	4.1e-15	0.02317	2.96563e-14	-	-	C	A	0.5789	-0.1582	0.0287	3.392e-08	0.0289813	4.79662e-08
5:45183148_A_G	rs36000907	p12	5	45183148	1	259	Yes	0	1	1	0	A	G	0.0725	0.0034	0.0676	0.0748	0.3035	0.0356	1.551e-17	++	82.2	5.622	1	0.01773	830901	102350	HCN1	-	-	-	G	A	0.925195	-0.360997	0.0404917	1.5e-20	0.0430871	5.36895e-17	-	-	G	A	0.9324	-0.1796	0.0626	0.004092	0.0632136	0.00449497
5:45398031_C_T	rs143574442	p12	5	45398031	0	259	Yes	0	1	1	0	T	C	0.9916	0.0023	0.9879	0.993	-0.8176	0.1321	6.141e-10	--	0	0.302	1	0.5826	682811	8909.14	HCN1	-	-	-	T	C	0.993047	-0.863413	0.146854	1.9e-09	0.156267	3.29014e-08	-	-	C	T	0.0121	0.7025	0.2452	0.004166	0.247603	0.00455114
5:51059833_A_C	rs7724721	q11.1	5	51059833	1	198	Yes	0	1	1	0	A	C	0.8257	0.0113	0.8119	0.835	0.177	0.0239	1.246e-13	++	0	0.19	1	0.6629	835446	229481	ISL1	-	-	-	C	A	0.165017	-0.185614	0.029084	1.3e-11	0.0309482	2.00283e-09	-	-	C	A	0.1881	-0.1644	0.0372	9.908e-06	0.0375646	1.20624e-05
5:61532825_C_G	rs12108677	q12.1	5	61532825	1	3	Yes	1	1	1	1	C	G	0.3997	0.0001	0.3996	0.3998	-0.1075	0.0186	8.209e-09	--	5.1	1.054	1	0.3046	835446	382015	KIF2A	-	-	-	G	C	0.600199	0.0927806	0.0221084	2.8e-06	0.0235255	8.01877e-05	-	-	G	C	0.6004	0.1324	0.0303	1.213e-05	0.030597	1.51002e-05
5:75003678_C_T	rs2307111	q13.3	5	75003678	1	273	Yes	0	1	1	0	T	C	0.5878	0.0038	0.5828	0.5907	-0.1643	0.0187	1.812e-18	--	90.7	10.7	1	0.001072	800188	380723	POC5	-	POC5	-	T	C	0.590714	-0.210782	0.0221011	7.6e-22	0.0235177	3.16823e-19	-	-	C	T	0.4172	0.0835	0.0307	0.00655	0.0310009	0.00707128
5:76623421_G_T	rs9686502	q13.3	5	76623421	1	53	Yes	0	1	1	0	T	G	0.5032	0.007	0.4941	0.5086	0.112	0.0183	9.143e-10	++	0	0.057	1	0.8121	803894	395858	PDE8B	-	-	-	T	G	0.508637	0.115293	0.0216725	1.4e-07	0.0230616	5.75252e-07	-	-	G	T	0.5059	-0.1063	0.0297	0.0003545	0.0299911	0.000393534
5:79041057_A_G	rs12514461	q14.1	5	79041057	1	309	Yes	0	1	1	0	A	G	0.8858	0.0008	0.8852	0.8869	-0.2851	0.0288	3.932e-23	--	0	0.004	1	0.9491	801643	160550	CMYA5	-	CMYA5	CMYA5	A	G	0.885173	-0.283673	0.0338432	3.2e-17	0.0360124	3.35093e-15	-	-	G	A	0.1131	0.2875	0.0474	1.281e-09	0.0478646	1.89542e-09
5:81134423_C_T	rs12518812	q14.1	5	81134423	1	223	Yes	0	1	1	0	T	C	0.2661	0.0046	0.2625	0.2721	0.1597	0.0206	1.013e-14	++	0	0.416	1	0.5187	810393	310942	SSBP2	-	-	SSBP2	C	T	0.73746	-0.17002	0.0245273	3.9e-12	0.0260994	7.30166e-11	-	-	C	T	0.7279	-0.1425	0.0334	2.008e-05	0.0337274	2.38884e-05
5:89380784_C_T	rs141062076	q14.3	5	89380784	1	168	Yes	0	1	1	0	T	C	0.0217	0.0007	0.0212	0.0226	0.4653	0.0661	1.876e-12	++	38.8	1.634	1	0.2012	804622	30548.1	CETN3	-	-	-	C	T	0.978822	-0.524988	0.0760156	7.7e-12	0.0808879	8.56561e-11	-	-	C	T	0.9774	-0.3458	0.1134	0.0023	0.114512	0.00252956
5:90410692_A_G	rs10942625	q14.3	5	90410692	1	45	Yes	0	1	1	0	A	G	0.629	0.0052	0.6223	0.633	0.1136	0.0188	1.643e-09	++	38.4	1.624	1	0.2026	818302	374090	GPR98	-	-	-	G	A	0.366955	-0.132244	0.0224212	2.6e-09	0.0238583	2.97517e-08	-	-	G	A	0.3777	-0.0827	0.0304	0.006463	0.030698	0.00706026
6:105791662_A_C	rs146643077	q21	6	105791662	1	279	Yes	0	1	1	0	A	C	0.0581	0.0021	0.0565	0.0607	0.3488	0.039	3.763e-19	++	0	0.007	1	0.9327	830685	86510	PREP	-	-	PREP	C	A	0.943524	-0.351468	0.0468133	1.6e-13	0.0498138	1.71821e-12	-	-	C	A	0.9393	-0.3447	0.0621	2.849e-08	0.0627087	3.86647e-08
6:118485317_A_G	rs11970553	q22.1	6	118485317	0	458	Yes	0	0	0	0	A	G	0.1415	0.0019	0.1401	0.1439	0.241	0.0263	5.48e-20	++	0	0.423	1	0.5154	825106	190568	SLC35F1	-	-	-	G	A	0.859915	-0.227619	0.0314234	1.9e-14	0.0334375	9.94507e-12	-	-	G	A	0.8561	-0.2629	0.0423	5.155e-10	0.0427146	7.51719e-10
6:118551502_C_CA	rs567411908	q22.1	6	118551502	0	458	No, not in IC-RHR	0	0	0	0	CA	C	0.05	0	0.05	0.05	0.7459	0.0578	3.713e-38	+?	0	0	0	1	485904	37812.9	SLC35F1	-	-	-	C	CA	0.950029	-0.745946	0.0542798	3.7e-43	0.0577589	3.71306e-38	-	-	-	-	-	-	-	-	-	-
6:118667522_C_T	rs11153730	q22.1	6	118667522	1	458	Yes	0	0	0	0	T	C	0.518	0.0025	0.516	0.5212	0.4619	0.018	9.19e-145	++	91.9	12.41	1	0.000427	819617	405435	SLC35F1	-	-	PLN,GOPC,BRD7P3,HSF2	T	C	0.516009	0.511513	0.0215005	6e-128	0.0228786	1.01588e-110	-	-	C	T	0.4788	-0.3806	0.029	1.982e-39	0.0292843	1.27663e-38
6:118734312_A_G	rs117178853	q22.31	6	118734312	0	458	Yes	0	0	0	0	A	G	0.984	0.0023	0.9809	0.9857	0.4851	0.0784	5.994e-10	++	0	0.816	1	0.3663	768896	23474.7	CEP85L	-	-	-	A	G	0.985733	0.432682	0.0916326	3e-06	0.0975059	9.1011e-06	-	-	G	A	0.0191	-0.5807	0.1304	8.42e-06	0.131678	1.03373e-05
6:118799997_T_TG	rs560689828	q22.31	6	118799997	0	458	No, not in IC-RHR	0	0	0	0	T	TG	0.004	0	0.004	0.004	1.5912	0.2561	5.194e-10	+?	0	0	0	1	485904	1919.1	CEP85L	-	-	-	TG	T	0.996027	-1.59116	0.24067	3.9e-11	0.256096	5.19361e-10	-	-	-	-	-	-	-	-	-	-
6:121689680_C_T	rs117777409	q22.31	6	121689680	0	488	Yes	0	0	0	0	T	C	0.0115	0.0002	0.0113	0.0116	0.6355	0.0922	5.479e-12	++	0	0.615	1	0.4327	771561	15255.7	TBC1D32	-	-	-	C	T	0.988358	-0.682175	0.10312	8.7e-11	0.10973	5.07153e-10	-	-	C	T	0.9887	-0.5234	0.1684	0.001878	0.170051	0.0020846
6:121726987_C_G	rs9490234	q22.31	6	121726987	0	488	Yes	0	0	0	0	C	G	0.683	0.0017	0.6808	0.6844	0.3301	0.0195	5.505e-64	++	87	7.666	1	0.005628	835445	344543	GJA1	-	-	-	G	C	0.315644	-0.372652	0.0233716	2.3e-58	0.0248696	9.31066e-51	-	-	G	C	0.3192	-0.2613	0.0313	7.245e-17	0.0316068	1.37133e-16
6:121763091_A_G	rs182992865	q22.31	6	121763091	0	488	No, not in IC-RHR	0	0	0	0	A	G	0.9935	0	0.9935	0.9935	-1.2104	0.211	9.716e-09	-?	0	0	0	1	485904	2832.08	GJA1	-	-	-	A	G	0.993523	-1.21036	0.198314	1.3e-09	0.211025	9.71558e-09	-	-	-	-	-	-	-	-	-	-
6:121876632_C_CA	rs36041444	q22.31	6	121876632	0	488	No, not in IC-RHR	0	0	0	0	CA	C	0.7637	0.0243	0.5029	0.7659	-0.2094	0.0312	1.832e-11	--	0	0.14	1	0.7087	489754	131065	GJA1	-	-	-	C	CA	0.234078	0.210486	0.0294159	2.4e-13	0.0313013	1.7619e-11	-	-	C	CA	0.4971	0.0846	0.3322	0.799	0.335456	0.800891
6:121902979_C_T	rs5026278	q22.31	6	121902979	0	488	Yes	0	0	0	0	T	C	0.856	0.0048	0.8535	0.865	0.1879	0.0288	6.46e-11	++	72.7	3.667	1	0.0555	771814	164127	GJA1	-	-	-	T	C	0.853487	0.158543	0.0306159	1.7e-07	0.0325783	1.13575e-06	-	-	C	T	0.135	-0.2913	0.0606	1.519e-06	0.061194	1.93333e-06
6:121916887_C_CCT	rs79450641	q22.31	6	121916887	0	488	Yes	0	0	0	0	CCT	C	0.9211	0.0165	0.9031	0.9362	-0.5341	0.0366	3.05e-48	--	0	0.001	1	0.9738	828838	94836.1	GJA1	-	-	-	CCT	C	0.936237	-0.532984	0.0466772	4.6e-30	0.049669	7.30297e-27	-	-	C	CCT	0.0969	0.5354	0.0536	1.663e-23	0.0541254	4.5162e-23
6:121996511_A_G	rs181793943	q22.31	6	121996511	0	488	No, not in UKB	0	0	0	0	A	G	0.0077	0.0045	0.0025	0.0117	1.1349	0.1858	1.015e-09	++	85.7	6.99	1	0.008195	682398	3838.83	GJA1	-	-	-	G	A	0.997478	-0.572655	0.265413	0.015	0.282425	0.0425974	-	-	G	A	0.9883	-1.5643	0.2444	1.551e-10	0.246796	2.32098e-10
6:122067361_A_G	rs117981790	q22.31	6	122067361	0	488	Yes	0	0	0	0	A	G	0.9858	0.0018	0.9831	0.987	0.6679	0.0885	4.561e-14	++	80.3	5.088	1	0.02409	771715	16642	GJA1	-	-	-	A	G	0.986956	0.539839	0.0988539	2.8e-08	0.10519	2.86625e-07	-	-	G	A	0.0169	-0.9793	0.1624	1.653e-09	0.163992	2.34882e-09
6:122127139_A_G	rs73769269	q22.31	6	122127139	0	488	Yes	0	0	0	0	A	G	0.8987	0.0828	0.8275	0.995	-0.7634	0.1213	3.074e-10	--	0	0.206	1	0.6497	530258	9658.61	GJA1	-	-	-	A	G	0.995011	-0.699389	0.174798	6.5e-05	0.186002	0.000169833	-	-	G	A	0.1725	0.8108	0.1584	3.073e-07	0.159953	3.9991e-07
6:122138479_A_C	rs9388008	q22.31	6	122138479	1	488	Yes	0	0	0	0	A	C	0.1275	0.0219	0.1091	0.1536	0.9702	0.0287	5.59e-250	++	62.9	2.695	1	0.1007	834254	163800	GJA1	-	-	PLN,GOPC,BRD7P3,HSF2	C	A	0.890883	-1.0097	0.0352239	1e-183	0.0374816	7.76978e-160	-	-	C	A	0.8464	-0.9139	0.0443	1.47e-94	0.0447342	9.1345e-93
6:122363070_C_T	rs117933734	q22.31	6	122363070	0	488	Yes	0	0	0	0	T	C	0.0172	0.0008	0.0157	0.0176	-0.8322	0.076	6.408e-28	--	0	0.355	1	0.5515	765080	23724.4	HSF2	-	-	-	C	T	0.98238	0.856858	0.0813196	3e-27	0.0865318	4.07108e-23	-	-	C	T	0.9843	0.7492	0.1572	1.888e-06	0.158741	2.36261e-06
6:122576086_A_G	rs12661260	q22.31	6	122576086	0	488	Yes	0	0	0	0	A	G	0.6976	0.0023	0.6947	0.6994	-0.272	0.0194	9.741e-45	--	0	0.136	1	0.7128	837060	350329	HSF2	-	-	-	A	G	0.699419	-0.277705	0.0233825	3e-33	0.0248812	6.31133e-29	-	-	G	A	0.3053	0.2631	0.0306	8.599e-18	0.0308999	1.67196e-17
6:127437617_C_T	rs2800708	q22.33	6	127437617	1	138	Yes	0	1	1	0	T	C	0.531	0.0005	0.5304	0.5314	0.1225	0.0181	1.225e-11	++	0	0.046	1	0.8306	818592	402783	RSPO3	-	-	RSPO3	C	T	0.468565	-0.119514	0.021504	2.8e-08	0.0228823	1.76062e-07	-	-	C	T	0.4696	-0.1275	0.0292	1.302e-05	0.0294862	1.53188e-05
6:134214525_C_G	rs12190287	q23.2	6	134214525	1	361	Yes	0	1	1	0	C	G	0.6283	0.0002	0.6281	0.6284	-0.2255	0.0191	2.911e-32	--	0	0.633	1	0.4264	814747	363364	TCF21	TCF21	-	TCF21	C	G	0.628448	-0.236693	0.0222442	2.6e-26	0.02367	1.52828e-23	-	-	G	C	0.3719	0.2049	0.0319	1.295e-10	0.0322127	2.00642e-10
6:148546826_C_T	rs12174018	q24.3	6	148546826	1	35	Yes	0	1	1	0	T	C	0.2565	0.0022	0.2537	0.2582	-0.123	0.0206	2.506e-09	--	0	0.109	1	0.7411	837060	309240	SASH1	-	-	SASH1	C	T	0.741791	0.128423	0.0247087	9.5e-08	0.0262924	1.03739e-06	-	-	C	T	0.7463	0.1144	0.033	0.0005259	0.0333235	0.000596906
6:1617143_C_T	rs9501744	p25.3	6	1617143	1	206	Yes	1	1	1	1	T	C	0.1376	0.0046	0.1341	0.1438	0.2035	0.0269	4.31e-14	++	0	0.131	1	0.7175	807371	180821	FOXC1,GMDS	-	-	-	C	T	0.865896	-0.196239	0.0315689	2.3e-10	0.0335923	5.16463e-09	-	-	C	T	0.8562	-0.2166	0.0447	1.245e-06	0.0451381	1.59777e-06
6:16741886_A_C	rs3812227	p22.3	6	16741886	1	161	Yes	0	1	1	0	A	C	0.811	0.0001	0.8109	0.811	0.1626	0.0233	3.234e-12	++	0	0.985	1	0.321	805567	239213	ATXN1	-	-	ATXN1	A	C	0.811027	0.180219	0.0275764	6.9e-11	0.0293439	8.16891e-10	-	-	C	A	0.1891	-0.1322	0.0381	0.0005154	0.0384735	0.000590076
6:17995002_A_G	rs6922864	p22.3	6	17995002	1	141	Yes	0	1	1	0	A	G	0.819	0.0035	0.8147	0.8219	0.1582	0.0233	1.139e-11	++	2.4	1.025	1	0.3113	837060	242419	KIF13A	-	-	KIF13A	A	G	0.821883	0.177256	0.0281645	2e-10	0.0299697	3.32882e-09	-	-	G	A	0.1853	-0.129	0.0367	0.0004444	0.0370597	0.000499793
6:20627777_C_T	rs2223620	p22.3	6	20627777	1	32	Yes	1	1	1	1	T	C	0.3238	0.0035	0.3194	0.3266	-0.1139	0.0191	2.643e-09	--	20.9	1.264	1	0.261	826449	358024	CDKAL1	-	-	-	C	T	0.673368	0.0968236	0.022938	2e-05	0.0244082	7.28312e-05	-	-	C	T	0.6806	0.141	0.0305	3.73e-06	0.030799	4.69271e-06
6:22136160_C_T	rs6915322	p22.3	6	22136160	1	283	Yes	0	1	1	0	T	C	0.4656	0.0052	0.4615	0.4722	-0.1669	0.0182	5.934e-20	--	37.4	1.597	1	0.2064	822301	399392	PRL	-	-	-	C	T	0.538462	0.184857	0.0217409	4.9e-17	0.0231344	1.34319e-15	-	-	C	T	0.5278	0.1373	0.0294	2.997e-06	0.0296882	3.75075e-06
6:25305814_C_T	rs6932783	p22.2	6	25305814	0	238	Yes	0	1	1	0	T	C	0.0591	0.008	0.0525	0.0689	-0.2462	0.0396	5.312e-10	--	0	0.757	1	0.3843	832668	83948.3	LRRC16A	-	-	-	C	T	0.94745	0.217797	0.0482383	3.8e-06	0.0513302	2.20493e-05	-	-	C	T	0.9311	0.2881	0.0618	3.116e-06	0.0624058	3.90151e-06
6:26123502_C_T	rs115740542	p22.2	6	26123502	1	238	Yes	0	1	1	0	T	C	0.933	0.0048	0.9297	0.94	-0.2964	0.037	1.212e-15	--	0	0.719	1	0.3964	812049	96469.3	HIST1H2BC,HIST1H2AC	-	HFE	-	T	C	0.929735	-0.318108	0.0422867	2.9e-14	0.0449971	1.55468e-12	-	-	C	T	0.06	0.2509	0.0646	0.0001017	0.0652332	0.000119964
6:28586613_A_ATGTG	rs142912263	p22.1	6	28586613	1	164	No, not in IC-RHR	1	1	1	1	A	ATGTG	0.3641	0.0031	0.3287	0.3644	-0.1807	0.0258	2.494e-12	--	0	0.174	1	0.677	489754	195939	SCAND3	-	-	-	A	ATGTG	0.364369	-0.179746	0.0243373	3.1e-13	0.0258972	3.90038e-12	-	-	A	ATGTG	0.3287	-0.3036	0.2933	0.3007	0.296175	0.30533
6:32679462_A_G	rs9275580	p21.32	6	32679462	1	67	Yes	1	1	1	1	A	G	0.7694	0.0056	0.7612	0.7733	-0.1386	0.0224	6e-10	--	0	0.361	1	0.5482	764028	268738	HLA-DQA2	-	-	-	A	G	0.773269	-0.129349	0.0255891	2.9e-07	0.0272293	2.03046e-06	-	-	G	A	0.2388	0.1581	0.039	4.93e-05	0.0393823	5.95729e-05
6:33737518_C_T	rs57150921	p21.31	6	33737518	0	320	No, not in IC-RHR	0	1	1	0	T	C	0.4525	0.0017	0.4521	0.46	0.151	0.0225	1.841e-11	++	0	0.679	1	0.4101	552687	273428	LEMD2	-	MLN	-	T	C	0.45214	0.155048	0.0216267	6.9e-14	0.0230129	1.61197e-11	-	-	C	T	0.54	-0.0673	0.103	0.5135	0.10401	0.517596
6:34569720_C_T	rs2814973	p21.31	6	34569720	1	320	Yes	0	1	1	0	T	C	0.1415	0.0038	0.1385	0.1463	-0.2581	0.0258	1.22e-23	--	43.1	1.759	1	0.1848	828704	195779	C6orf106	C6orf106,C6ORF106	UHRF1BP1	-	C	T	0.861525	0.285538	0.0310512	5e-21	0.0330415	5.53288e-18	-	-	C	T	0.8537	0.2156	0.0407	1.156e-07	0.0410989	1.5554e-07
6:36817113_A_G	rs236352	p21.2	6	36817113	1	393	Yes	0	0	1	0	A	G	0.3408	0.0019	0.3393	0.3432	-0.2627	0.0188	3.56e-44	--	0	0.095	1	0.7583	835445	368896	CPNE5,PPIL1	-	-	PI16,PPIL1	A	G	0.339317	-0.267362	0.0227595	4.4e-34	0.0242183	2.45926e-28	-	-	G	A	0.6568	0.2555	0.0297	8.394e-18	0.0299911	1.60675e-17
6:41658112_C_G	rs9471627	p21.1	6	41658112	1	304	Yes	0	1	1	0	C	G	0.4597	0.0036	0.4568	0.4642	0.1754	0.018	1.557e-22	++	0	0.127	1	0.7213	832112	407636	TFEB	-	-	TFEB	G	C	0.543185	-0.180453	0.0215426	1.2e-16	0.0229234	3.49009e-15	-	-	G	C	0.5358	-0.1673	0.0286	5.282e-09	0.0288803	6.91941e-09
6:41786136_A_G	rs33954419	p21.1	6	41786136	0	304	Yes	0	1	1	0	A	G	0.4809	0.0026	0.4788	0.4842	-0.1466	0.018	3.906e-16	--	26.2	1.356	1	0.2443	813429	405343	USP49	MED20	PRICKLE4	CCND3	G	A	0.521159	0.162901	0.0214213	8.5e-15	0.0227943	8.89781e-13	-	-	G	A	0.5158	0.1196	0.0291	3.939e-05	0.0293852	4.69988e-05
6:45973908_A_G	rs9689698	p21.1	6	45973908	1	72	Yes	0	1	1	0	A	G	0.4018	0.002	0.4002	0.4043	-0.1145	0.0183	4.278e-10	--	0	0.044	1	0.8334	835445	391804	CLIC5	-	-	-	A	G	0.400248	-0.111399	0.0221049	2.9e-07	0.0235217	2.17974e-06	-	-	G	A	0.5957	0.1193	0.029	3.893e-05	0.0292843	4.624e-05
6:51832494_C_T	rs13205180	p12.2	6	51832494	1	26	No, not in IC-RHR	0	1	1	0	T	C	0.476	0.008	0.4656	0.4821	0.1081	0.0183	3.542e-09	++	68.5	3.175	1	0.07476	769179	372469	PKHD1	-	-	-	C	T	0.517903	-0.132956	0.0216335	7.8e-10	0.0230201	7.66594e-09	-	-	C	T	0.5344	-0.0653	0.0299	0.02924	0.0301931	0.0305606
6:53985167_A_G	rs1280947	p12.1	6	53985167	1	286	Yes	0	1	1	0	A	G	0.3847	0.0178	0.3708	0.4074	-0.1722	0.0187	2.889e-20	--	72	3.571	1	0.05881	835445	380484	MLIP	-	MLIP	MLIP	A	G	0.370819	-0.199786	0.0222771	3.7e-20	0.023705	3.51558e-17	-	-	G	A	0.5926	0.1271	0.03	2.219e-05	0.0302941	2.7222e-05
6:7532421_A_G	rs72825047	p24.3	6	7532421	1	368	Yes	0	0	1	0	A	G	0.9066	0.002	0.905	0.9093	-0.3815	0.0315	1.024e-33	--	0	0.585	1	0.4442	831527	131703	DSP	-	-	DSP	A	G	0.905038	-0.399635	0.0370446	4.8e-27	0.039419	3.74194e-24	-	-	G	A	0.0907	0.3494	0.052	1.84e-11	0.0525097	2.85216e-11
6:76282363_C_T	rs7747801	q14.1	6	76282363	1	89	Yes	0	1	1	0	T	C	0.3844	0.0027	0.3822	0.3878	-0.1169	0.0184	1.977e-10	--	0	0.313	1	0.576	835445	389433	SENP6	-	-	FILIP1,SENP6,MYO6,-	T	C	0.382246	-0.108716	0.022073	2e-06	0.0234878	3.68114e-06	-	-	C	T	0.6122	0.1298	0.0292	9.117e-06	0.0294862	1.0723e-05
7:100254991_C_T	rs73170760	q22.1	7	100254991	0	463	Yes	0	0	0	0	T	C	0.1718	0.0033	0.1693	0.1761	-0.3014	0.0243	2.1e-35	--	0	0.076	1	0.7827	837059	224789	ACTL6B	-	-	-	C	T	0.830717	0.306511	0.0286241	1e-26	0.0304588	8.03934e-24	-	-	C	T	0.8239	0.2926	0.0398	1.976e-13	0.0401901	3.3284e-13
7:100261913_T_TCTGA	rs534171549	q22.1	7	100261913	0	463	No, not in IC-RHR	0	0	0	0	T	TCTGA	0.1539	0	0.1539	0.1539	-0.3112	0.0362	8.339e-18	-?	0	0	0	1	485904	97598.4	ACTL6B,GNB2	-	-	-	TCTGA	T	0.846093	0.311162	0.0340227	5.1e-21	0.0362034	8.3392e-18	-	-	-	-	-	-	-	-	-	-
7:100331052_A_G	rs554897471	q22.1	7	100331052	0	463	No, not in IC-RHR	0	0	0	0	A	G	0.0219	0.0023	0.0062	0.0222	-0.6604	0.1075	8.092e-10	-+	59.5	2.469	1	0.1161	548837	11474	EPO	-	-	-	G	A	0.977821	0.684795	0.102074	3.6e-11	0.108617	2.88745e-10	-	-	G	A	0.9938	-0.5085	0.7443	0.4945	0.751596	0.498685
7:100509253_A_C	rs13244629	q22.1	7	100509253	1	463	Yes	0	0	0	0	A	C	0.82	0.0017	0.8179	0.8213	-0.6161	0.0234	7.27e-153	--	78.3	4.609	1	0.0318	837059	240621	ACHE	ACHE,SRRT,TRIP6	UFSP1	GIGYF1,GNB2,EPHB4,AZGP1P1,TRIP6,C7orf61,SRRT,TSC22D4,MOSPD3,AP4M1,MEPCE,MUC3A,TAF6,ARPC1A,-,AGFG2,PCOLCE,ZNF498,MCM7,PDAP1,ZKSCAN1	A	C	0.821339	-0.655676	0.0279997	4.3e-122	0.0297944	2.48365e-107	-	-	C	A	0.1821	0.5524	0.0374	2.292e-49	0.0377666	1.89817e-48
7:107613379_A_G	rs2701034	q31.1	7	107613379	1	86	Yes	0	1	1	0	A	G	0.5538	0.0005	0.5531	0.5542	-0.1173	0.0185	2.14e-10	--	0	0.326	1	0.5679	797560	387237	LAMB1	-	-	LAMB1	G	A	0.4458	0.10935	0.0217289	8.4e-07	0.0231216	2.25254e-06	-	-	G	A	0.4469	0.1313	0.0304	1.54e-05	0.030698	1.89297e-05
7:116438418_A_G	rs6566	q31.2	7	116438418	1	292	Yes	0	0	1	0	A	G	0.4448	0.0034	0.4403	0.4474	-0.1752	0.0184	1.427e-21	--	53.6	2.155	1	0.1421	807034	393754	MET	MET	-	CAPZA2,MET	G	A	0.552601	0.195706	0.0216943	1.8e-19	0.0230848	2.29701e-17	-	-	G	A	0.5597	0.1398	0.03	3.184e-06	0.0302941	3.93538e-06
7:123440559_A_G	rs12056098	q31.32	7	123440559	1	290	Yes	0	1	1	0	A	G	0.7126	0.0154	0.7011	0.7332	0.1914	0.0204	5.985e-21	++	74.5	3.925	1	0.04756	837059	320414	HYAL4	-	ASB15	LMOD2,WASL,ASB15	A	G	0.701115	0.221595	0.023919	9.2e-22	0.0254521	3.13813e-18	-	-	G	A	0.2668	-0.1374	0.0337	4.627e-05	0.0340303	5.40065e-05
7:126997587_C_T	rs4731350	q31.33	7	126997587	1	230	Yes	0	0	1	0	T	C	0.2708	0.0021	0.2681	0.2724	0.1603	0.0202	2.289e-15	++	0	0.191	1	0.6624	821420	322245	ZNF800	-	-	-	T	C	0.272418	0.167195	0.0241366	5.3e-12	0.0256837	7.526e-11	-	-	C	T	0.7319	-0.149	0.0325	4.534e-06	0.0328186	5.6224e-06
7:130890899_A_G	rs6978042	q32.3	7	130890899	0	406	Yes	0	0	1	0	A	G	0.3973	0.0019	0.3958	0.3996	0.1112	0.0183	1.173e-09	++	0	0.017	1	0.8961	834253	395796	MKLN1	-	-	MKLN1	G	A	0.604219	-0.113087	0.0220245	2.9e-08	0.0234362	1.39781e-06	-	-	G	A	0.6004	-0.1082	0.0289	0.0001777	0.0291833	0.00020923
7:130973495_C_T	rs35680304	q32.3	7	130973495	1	406	Yes	0	0	1	0	T	C	0.5772	0.0105	0.5639	0.5856	-0.2677	0.0184	6.611e-48	--	82.5	5.719	1	0.01678	835444	394424	MKLN1	-	-	MKLN1	C	T	0.414442	0.30268	0.0220982	1.6e-42	0.0235146	6.47037e-38	-	-	C	T	0.4361	0.2123	0.0293	4.486e-13	0.0295872	7.20957e-13
7:135278791_C_T	rs12530805	q33	7	135278791	1	108	Yes	0	1	1	0	T	C	0.1726	0.0015	0.1714	0.1745	-0.1542	0.0238	1.008e-10	--	42	1.723	1	0.1893	837059	231325	NUP205	C7orf73,SLC13A4	-	CNOT4,NUP205	C	T	0.828603	0.17898	0.0285971	1.7e-10	0.0304301	4.06111e-09	-	-	C	T	0.8255	0.1147	0.038	0.002531	0.0383725	0.00279781
7:136566533_A_G	rs2113550	q33	7	136566533	0	416	Yes	0	0	0	0	A	G	0.6371	0.0092	0.6303	0.6496	0.1685	0.019	8.953e-19	++	34.5	1.526	1	0.2167	820883	366885	CHRM2	-	-	-	A	G	0.630314	0.185871	0.0222362	1e-17	0.0236614	3.98383e-15	-	-	G	A	0.3504	-0.1366	0.0318	1.784e-05	0.0321117	2.10078e-05
7:136626978_A_C	rs73158750	q33	7	136626978	1	416	Yes	0	0	0	0	A	C	0.1596	0.0059	0.1549	0.1669	0.394	0.0248	4.726e-57	++	0	0.337	1	0.5616	837059	215177	CHRM2	-	-	CHRM2	C	A	0.845091	-0.382408	0.029907	1.1e-37	0.0318239	2.91491e-33	-	-	C	A	0.8331	-0.4118	0.039	4.349e-26	0.0393823	1.36845e-25
7:150655643_A_G	rs758890	q36.1	7	150655643	0	262	Yes	0	1	1	0	A	G	0.3454	0.0017	0.3441	0.3476	-0.1148	0.0191	1.94e-09	--	43.7	1.776	1	0.1826	824416	362591	KCNH2	-	-	KCNH2	G	A	0.655912	0.134659	0.0227871	3.5e-09	0.0242477	2.8003e-08	-	-	G	A	0.6524	0.0821	0.0308	0.00769	0.0311019	0.0082977
7:151412273_A_T	rs73484140	q36.1	7	151412273	1	262	Yes	0	1	1	0	A	T	0.2983	0.0063	0.2935	0.3067	0.176	0.0205	9.391e-18	++	0	0.05	1	0.8235	834253	318872	PRKAG2	-	-	PRKAG2	T	A	0.706497	-0.179426	0.0241111	3.7e-13	0.0256565	2.68327e-12	-	-	T	A	0.6933	-0.1699	0.0338	4.941e-07	0.0341313	6.42995e-07
7:155533924_C_G	rs73167163	q36.3	7	155533924	1	85	Yes	0	1	1	0	C	G	0.8461	0.0058	0.8435	0.8591	-0.1855	0.0292	2.179e-10	--	0	0.087	1	0.7686	689080	159051	RBM33	-	-	RBM33	C	G	0.843514	-0.181608	0.0301	4.4e-10	0.0320293	1.42747e-08	-	-	G	C	0.1409	0.2046	0.0706	0.003752	0.071292	0.00410619
7:15943960_C_T	rs28135	p21.2	7	15943960	1	236	Yes	0	1	1	0	T	C	0.4174	0.0022	0.4157	0.4202	-0.1451	0.0182	1.313e-15	--	0	0.001	1	0.971	832638	398521	ISPD	-	-	MEOX2	C	T	0.584326	0.145655	0.0218414	2.8e-11	0.0232413	3.67918e-10	-	-	C	T	0.5798	0.1443	0.0288	5.616e-07	0.0290823	6.98496e-07
7:26582218_A_G	rs2158711	p15.2	7	26582218	1	291	Yes	0	1	1	0	A	G	0.4773	0.0022	0.4747	0.4791	-0.175	0.0184	1.976e-21	--	0	0.045	1	0.8318	832111	410836	KIAA0087	-	-	-	A	G	0.479141	-0.178339	0.0226275	5.6e-15	0.0240778	1.2941e-13	-	-	G	A	0.5253	0.1704	0.0283	1.82e-09	0.0285774	2.48021e-09
7:28200097_C_T	rs1513272	p15.1	7	28200097	1	298	Yes	0	1	1	0	T	C	0.4816	0.0078	0.4716	0.4877	-0.1748	0.0181	5.783e-22	--	0	0.036	1	0.8505	818842	402779	JAZF1	JAZF1	-	-	C	T	0.512258	0.177449	0.0216299	2.8e-15	0.0230163	1.261e-14	-	-	C	T	0.5284	0.1704	0.0292	5.231e-09	0.0294862	7.51588e-09
7:35298564_A_G	rs336285	p14.2	7	35298564	1	341	Yes	0	0	1	0	A	G	0.3274	0.0039	0.3243	0.3322	0.2061	0.0191	3.714e-27	++	16.9	1.203	1	0.2727	835444	361901	TBX20	-	-	TBX20,MIR548N	A	G	0.324274	0.2229	0.023013	5.8e-22	0.024488	8.83546e-20	-	-	G	A	0.6678	-0.18	0.0302	2.405e-09	0.030496	3.5823e-09
7:35461967_A_T	rs150260620	p14.2	7	35461967	0	341	Yes	0	0	1	0	A	T	0.0234	0.0009	0.0227	0.0246	-0.427	0.0643	3.034e-11	--	60.4	2.526	1	0.112	809696	30957.2	TBX20	-	-	-	T	A	0.97727	0.354878	0.07394	3.9e-07	0.0786792	6.46934e-06	-	-	T	A	0.9754	0.5716	0.1103	2.216e-07	0.111381	2.8679e-07
7:44873125_A_C	rs12155039	p13	7	44873125	1	189	Yes	1	1	1	1	A	C	0.422	0.0043	0.4165	0.4254	0.1333	0.0183	2.955e-13	++	51.4	2.057	1	0.1515	835444	396369	PPIA,H2AFV	-	-	PURB,H2AFV	C	A	0.574632	-0.112871	0.0217928	4.1e-07	0.0231896	1.1313e-06	-	-	C	A	0.5835	-0.1669	0.0294	1.346e-08	0.0296882	1.89015e-08
7:73042085_C_T	rs62466318	q11.23	7	73042085	1	150	Yes	0	1	1	0	T	C	0.1967	0.0028	0.193	0.1988	-0.1576	0.023	6.494e-12	--	19.3	1.239	1	0.2658	827222	251027	MLXIPL	MLXIPL	-	BAZ1B,MLXIPL,BCL7B,FZD9	C	T	0.801176	0.176865	0.0269948	1.5e-10	0.0287251	7.40571e-10	-	-	C	T	0.807	0.1237	0.0378	0.00106	0.0381705	0.00119228
7:81588636_A_G	rs1229502	q21.11	7	81588636	1	214	Yes	0	1	1	0	A	G	0.3019	0.0008	0.3009	0.3025	-0.1507	0.0197	1.999e-14	--	0	0.477	1	0.4897	834939	338684	CACNA2D1	-	-	CACNA2D1	G	A	0.697535	0.139878	0.0236765	3.7e-09	0.0251941	2.82384e-08	-	-	G	A	0.6991	0.1678	0.0313	8.097e-08	0.0316068	1.10238e-07
7:83936339_C_T	rs501229	q21.11	7	83936339	1	68	Yes	0	1	1	0	T	C	0.7024	0.0016	0.7012	0.7044	0.1215	0.0196	5.385e-10	++	0	0.083	1	0.7732	835444	342573	SEMA3A	-	-	-	C	T	0.298809	-0.126003	0.0234424	3.5e-08	0.024945	4.3895e-07	-	-	C	T	0.2956	-0.1144	0.0313	0.000261	0.0316068	0.000295202
7:93548608_A_G	rs180247	q21.3	7	93548608	1	429	Yes	0	0	0	0	A	G	0.3489	0.0003	0.3487	0.3492	0.3443	0.0189	2.401e-74	++	0	0.038	1	0.845	832638	370725	GNGT1,GNG11	GNG11	-	-	A	G	0.348683	0.347189	0.02258	5.3e-54	0.0240273	2.51484e-47	-	-	G	A	0.6508	-0.3396	0.0302	2.875e-29	0.030496	8.39124e-29
7:99682026_C_T	rs12705071	q22.1	7	99682026	0	463	Yes	0	0	0	0	T	C	0.7238	0.002	0.7222	0.7263	-0.191	0.0201	1.861e-21	--	0	0.048	1	0.8266	837059	328849	ZNF3,COPS6,MCM7	GAL3ST4,PVRIG,STAG3	MCM7	-	T	C	0.722249	-0.194447	0.0240312	7.2e-17	0.0255715	2.87001e-14	-	-	C	T	0.2737	0.1854	0.0321	7.374e-09	0.0324146	1.06752e-08
8:106321126_C_G	rs74339976	q23.1	8	106321126	1	194	Yes	0	1	1	0	C	G	0.4979	0.0029	0.4956	0.5016	-0.1334	0.0181	1.889e-13	--	0	0.014	1	0.9042	832112	403602	ZFPM2	-	-	ZFPM2	G	C	0.504372	0.131715	0.021763	2.1e-09	0.0231579	1.28771e-08	-	-	G	C	0.4984	0.1362	0.0289	2.353e-06	0.0291833	3.05545e-06
8:106674812_C_T	rs2218279	q23.1	8	106674812	0	194	Yes	0	1	1	0	T	C	0.5651	0.0065	0.5566	0.5701	-0.1324	0.0189	2.56e-12	--	0	0.48	1	0.4886	806610	371475	ZFPM2	-	-	ZFPM2	T	C	0.570111	-0.142368	0.0223457	1.7e-10	0.023778	2.13233e-09	-	-	C	T	0.4434	0.1152	0.0309	0.0001904	0.0312029	0.000222526
8:11661502_A_T	rs184974686	p23.1	8	11661502	1	197	No, not in IC-RHR	0	1	1	0	A	T	0.0122	0.003	0.0099	0.0161	0.7017	0.0947	1.296e-13	++	85.7	7.008	1	0.008113	778712	14305.7	FDFT1	-	-	GATA4,C8orf49	T	A	0.990102	-0.895203	0.11245	1.3e-15	0.119658	7.355e-14	-	-	T	A	0.9839	-0.3766	0.1536	0.01424	0.155106	0.0151814
8:124665211_C_T	rs7387855	q24.13	8	124665211	1	80	Yes	1	1	1	1	T	C	0.8395	0.0085	0.8292	0.8465	-0.1552	0.0246	2.73e-10	--	0	0.104	1	0.7473	831319	218769	KLHL38	-	KLHL38	-	C	T	0.153511	0.148741	0.0298843	1.5e-07	0.0317998	2.90499e-06	-	-	C	T	0.1708	0.1649	0.0384	1.79e-05	0.0387764	2.11315e-05
8:145018354_C_T	rs11786896	q24.3	8	145018354	1	343	Yes	0	0	1	0	T	C	0.0482	0.0001	0.0481	0.0482	-0.4933	0.045	5.801e-28	--	17.8	1.216	1	0.2701	769988	64841.6	PLEC	-	SHARPIN	PLEC,OPLAH,CYC1	C	T	0.951756	0.526401	0.0508347	1.1e-25	0.054093	2.21505e-22	-	-	C	T	0.9519	0.4189	0.0803	1.822e-07	0.0810871	2.39093e-07
8:4833790_A_G	rs7463166	p23.2	8	4833790	1	249	Yes	0	1	1	0	A	G	0.6373	0.0015	0.6361	0.6393	0.1568	0.0188	8.668e-17	++	25.3	1.338	1	0.2474	827272	374133	CSMD1	-	-	-	A	G	0.636127	0.173817	0.0224711	3.1e-14	0.0239114	3.61598e-13	-	-	G	A	0.3607	-0.1289	0.0303	2.078e-05	0.030597	2.52189e-05
8:48867273_C_G	rs1231204	q11.21	8	48867273	1	46	No, not in IC-RHR	0	1	1	0	C	G	0.9498	0.0034	0.9455	0.9525	0.2538	0.042	1.553e-09	++	59.1	2.443	1	0.1181	803499	75520.1	PRKDC,MCM4	-	PRKDC	-	G	C	0.0474565	-0.306324	0.0505813	3e-10	0.0538234	1.26087e-08	-	-	G	C	0.0545	-0.1717	0.0666	0.009951	0.0672528	0.0106783
9:102198655_A_G	rs1530379	q22.33	9	102198655	1	190	Yes	1	1	1	1	A	G	0.3402	0.0075	0.3342	0.3496	-0.1386	0.019	2.638e-13	--	0	0.124	1	0.7248	832636	368139	SEC61B	-	-	-	A	G	0.334198	-0.133227	0.0228319	3.6e-09	0.0242953	4.16647e-08	-	-	G	A	0.6504	0.1469	0.03	9.689e-07	0.0302941	1.24001e-06
9:112515043_A_G	rs10980026	q31.3	9	112515043	1	113	Yes	0	1	1	0	A	G	0.7202	0.0102	0.7075	0.7284	-0.1302	0.0201	8.456e-11	--	0	0.153	1	0.6956	823585	329341	PALM2	-	-	PALM2	A	G	0.728431	-0.123926	0.0241922	1e-07	0.0257428	1.47937e-06	-	-	G	A	0.2925	0.14	0.0317	9.942e-06	0.0320107	1.22251e-05
9:123478769_A_T	rs10984994	q33.2	9	123478769	1	121	Yes	0	1	1	0	A	T	0.6943	0.0014	0.6925	0.6953	0.1303	0.0197	3.761e-11	++	0	0.504	1	0.4778	809802	341616	MEGF9	MEGF9	-	MEGF9,FBXW2	T	A	0.304659	-0.14104	0.0233566	1.1e-10	0.0248537	1.38836e-08	-	-	T	A	0.3075	-0.1121	0.032	0.0004522	0.0323137	0.000522165
9:128339459_A_G	rs147572409	q33.3	9	128339459	1	390	Yes	0	0	1	0	A	G	0.5303	0.0172	0.5078	0.5434	0.2461	0.0182	1.777e-41	++	83.2	5.938	1	0.01482	826448	397503	MAPKAP1	-	-	MAPKAP1,PBX3	G	A	0.456553	-0.280171	0.0215992	2.1e-38	0.0229836	3.51294e-34	-	-	G	A	0.4922	-0.1881	0.0297	2.546e-10	0.0299911	3.56768e-10
9:129335865_C_T	rs56100798	q33.3	9	129335865	0	390	Yes	0	1	1	0	T	C	0.2558	0.007	0.2505	0.2651	0.2424	0.0211	1.33e-30	++	0	0.108	1	0.7423	767686	282152	LMX1B	-	-	-	C	T	0.749497	-0.247686	0.0248843	9.2e-24	0.0264793	8.44302e-21	-	-	C	T	0.7349	-0.2333	0.0345	1.334e-11	0.0348382	2.1321e-11
9:136138765_G_GCGCCCACCACTA	rs587729126	q34.2	9	136138765	1	153	Yes	0	1	1	0	G	GCGCCCACCACTA	0.1697	0.0137	0.1489	0.1787	-0.1729	0.0251	5.258e-12	--	11.5	1.13	1	0.2877	826937	212654	OBP2B	-	-	-	GCGCCCACCACTA	G	0.821316	0.190496	0.0282163	1.5e-11	0.0300248	2.22987e-10	-	-	G	GCGCCCACCACTA	0.1489	-0.1325	0.0451	0.003313	0.0455421	0.00362126
9:136522274_C_T	rs6271	q34.2	9	136522274	0	153	Yes	0	1	1	0	T	C	0.0698	0.0018	0.0668	0.0709	-0.2218	0.0381	5.877e-09	--	0	0.099	1	0.7525	794816	93321.5	DBH,SARDH	-	DBH	-	C	T	0.929141	0.214569	0.0418694	2.4e-07	0.0445531	1.4644e-06	-	-	C	T	0.9332	0.2417	0.0729	0.000909	0.0736146	0.00102593
9:13663809_A_G	rs4008024	p23	9	13663809	0	74	No, not in IC-RHR	0	1	1	0	A	G	0.5786	0.0013	0.5784	0.594	-0.1408	0.0232	1.207e-09	--	53.2	2.138	1	0.1437	489754	236113	MPDZ	-	-	-	G	A	0.421559	0.137814	0.0218407	9.8e-10	0.0232406	3.03153e-09	-	-	G	A	0.406	0.5303	0.2648	0.0452	0.267396	0.0473446
9:14532236_A_G	rs13284733	p22.3	9	14532236	1	74	No, not in IC-RHR	0	1	1	0	A	G	0.5264	0.0034	0.5238	0.5309	-0.116	0.0186	4.155e-10	--	76.4	4.243	1	0.0394	817752	385040	ZDHHC21	-	-	NFIB	G	A	0.476215	0.145471	0.0220298	1.2e-11	0.0234418	5.4482e-10	-	-	G	A	0.4691	0.0664	0.0301	0.02725	0.030395	0.0289206
9:20215705_A_G	rs398471	p21.3	9	20215705	1	81	Yes	1	1	1	1	A	G	0.5813	0.0036	0.5768	0.5842	0.116	0.0184	2.578e-10	++	40.5	1.681	1	0.1948	835442	395660	MLLT3	-	-	-	G	A	0.415791	-0.135083	0.0220896	9.9e-10	0.0235055	9.09055e-09	-	-	G	A	0.4232	-0.0863	0.0291	0.003021	0.0293852	0.00331566
9:33969563_G_GAA	rs147777365	p13.3	9	33969563	1	33	Yes	1	1	1	1	G	GAA	0.193	0.0751	0.1134	0.2639	-0.1491	0.025	2.608e-09	--	0	0.637	1	0.4248	767221	199047	UBAP2	-	-	-	GAA	G	0.886618	0.127954	0.0342998	9.9e-05	0.0364983	0.000455315	-	-	G	GAA	0.2639	-0.168	0.0341	8.633e-07	0.0344342	1.06699e-06
9:35909518_A_G	rs748802	p13.3	9	35909518	1	307	Yes	0	0	1	0	A	G	0.3423	0.0033	0.3397	0.3464	-0.1896	0.0193	7.129e-23	--	86.6	7.47	1	0.006274	837057	359934	HRCT1	LINC00961,RP11-327L3.3	-	-	G	A	0.660289	0.231757	0.0231868	6.8e-24	0.024673	5.82317e-21	-	-	G	A	0.6536	0.1239	0.0305	4.705e-05	0.030799	5.74949e-05
9:37749508_A_G	rs12345385	p13.2	9	37749508	1	83	Yes	0	1	1	0	A	G	0.7264	0.0013	0.7248	0.7274	-0.1288	0.0203	2.25e-10	--	0	0.007	1	0.9316	823474	321214	FRMPD1,TRMT10B	-	-	DCAF10	A	G	0.727387	-0.12741	0.0242355	1.3e-07	0.0257889	7.79231e-07	-	-	G	A	0.2752	0.131	0.0326	5.728e-05	0.0329195	6.90897e-05
9:71827135_C_T	rs56207218	q21.11	9	71827135	1	140	Yes	0	1	1	0	T	C	0.7927	0.001	0.7918	0.794	0.1504	0.0222	1.18e-11	++	30.6	1.441	1	0.2299	834399	267546	TJP2	-	-	-,TJP2	T	C	0.791845	0.171405	0.0265575	7.6e-11	0.0282597	1.3167e-09	-	-	C	T	0.206	-0.1167	0.0354	0.0009682	0.035747	0.00109615
9:81650381_A_G	rs11788042	q21.31	9	81650381	1	285	Yes	0	1	1	0	A	G	0.272	0.0085	0.2653	0.2828	0.1898	0.0207	4.238e-20	++	0	0.549	1	0.4587	821973	313469	TLE4	-	-	-	A	G	0.265276	0.201879	0.0247608	1.4e-15	0.0263479	1.8297e-14	-	-	G	A	0.7172	-0.1704	0.033	2.482e-07	0.0333235	3.1622e-07
9:83275564_T_TTG	rs201767334	q21.32	9	83275564	1	129	Yes	0	1	1	0	T	TTG	0.7083	0.0565	0.6802	0.8219	-0.1504	0.0225	2.423e-11	--	0	0.908	1	0.3407	832826	269616	TLE1	-	-	TLE1	T	TTG	0.680237	-0.139764	0.0236442	1.6e-09	0.0251597	2.77492e-08	-	-	T	TTG	0.8219	-0.1936	0.0501	0.0001115	0.0505911	0.00012984
9:9348397_C_T	rs9299094	p23	9	9348397	1	65	Yes	0	1	1	0	T	C	0.3539	0.0022	0.3522	0.3566	0.1157	0.0187	6.175e-10	++	0	0.303	1	0.5817	830541	376820	PTPRD	-	-	-	T	C	0.352157	0.12398	0.0225751	1.7e-08	0.0240221	2.4552e-07	-	-	C	T	0.6434	-0.1029	0.0295	0.0004956	0.0297892	0.000551771
9:99187403_A_G	rs7860871	q22.32	9	99187403	1	165	Yes	0	0	1	0	A	G	0.8193	0.0076	0.8098	0.8253	0.1672	0.0239	2.474e-12	++	0	0.173	1	0.6777	833474	236159	ZNF367	-	-	CDC14B	A	G	0.825297	0.159253	0.0286869	4.6e-09	0.0305256	1.81816e-07	-	-	G	A	0.1902	-0.1796	0.0379	2.082e-06	0.0382715	2.69507e-06
[truncated: 36 more columns]

## Sheet: SD3
Supplementary Data 3: Comparison of previously RHR associated loci and/or genetic variants identified in the studies from Guo et al, Eppinga et al, and Den hoed et al., with the genetic variants associated with RHR in the current study. We checked within an one MB window whether previously identified RHR loci and/or genetic variants were within range of the RHR genetic variants identified in the …
														Meta-analysis					UK Biobank					IC-RHR
Uniqid	SNP	PMID	Chr	Pos	A1	A2	A1FREQ	BETA	SE	P	Within genome-wide significant locus in current study	Locus when applying current study methodology	Within genome-wide significant locus in current study, taken into account differences in clumping and P-value tresholds	A1	A1FREQ	BETA	SE	P	A1	A1FREQ	BETA	SE	P	A1	A1FREQ	BETA	SE	P
1:112569287_A_G	rs426037	31648709	1	112569287	A	G	-	-	-	2.6e-08	1	0	0	A	0.5461	0.0837	0.0181	3.977e-06	A	0.545604	0.104433	0.0216847	1.4e-06	G	0.4531	-0.0501	0.0291	0.08489
1:156450873_C_T	rs2274319	31648709	1	156450873	T	C	-	-	-	2.9e-13	1	1	1	T	0.3451	-0.1505	0.0187	9.205e-16	T	0.347083	-0.135579	0.0225347	3.3e-10	C	0.658	0.1739	0.0297	4.908e-09
1:173853833_T_TGTG	rs772960943	31648709	1	173853833	TGTG	T	-	-	-	1.3e-11	1	1	1	T	0.2247	-0.1359	0.0215	2.62e-10	TGTG	0.77865	0.156542	0.0259119	1e-09	T	0.23	-0.1038	0.034	0.002255
1:175327147_G_T	rs10489318	31648709	1	175327147	G	T	-	-	-	3.5e-09	0	0	0	T	0.3351	0.1025	0.0192	9.645e-08	G	0.664613	-0.106176	0.0227936	1.4e-06	G	0.6653	-0.0963	0.0312	0.002004
1:180366483_C_G	rs10798759	31648709	1	180366483	G	C	-	-	-	1.2e-08	0	0	0	C	0.6179	-0.0728	0.0184	7.869e-05	G	0.379007	0.115986	0.0221148	5.6e-08	G	0.3869	0.0041	0.0294	0.888
1:183369036_C_T	rs9425595	31648709	1	183369036	C	T	-	-	-	2.7e-10	1	1	1	T	0.4528	0.1125	0.0181	5.374e-10	C	0.542947	-0.135979	0.0216312	3e-10	C	0.5541	-0.0742	0.0291	0.0106
1:205062466_A_G	rs71633532	31648709	1	205062466	G	A	-	-	-	2.4e-10	1	1	1	A	0.0793	0.2334	0.0371	3.064e-10	G	0.935942	-0.297778	0.0447863	8e-11	G	0.8973	-0.1347	0.0584	0.02116
1:208134887_A_G	rs11583119	31648709	1	208134887	G	A	-	-	-	1.3e-85	1	1	1	A	0.3445	-0.3948	0.0188	5.63e-98	G	0.651809	0.416746	0.0225626	9.1e-78	G	0.6614	0.36	0.0299	1.967e-33
1:211971587_C_T	rs3738197	31648709	1	211971587	C	T	-	-	-	1e-09	1	0	0	T	0.4257	-0.1108	0.0181	1.036e-09	C	0.570744	0.132587	0.0217322	5.9e-10	C	0.5801	0.0758	0.029	0.008861
1:214223779_A_G	rs12062203	31648709	1	214223779	G	A	-	-	-	1.6e-08	0	0	0	A	0.0215	0.3149	0.0633	6.518e-07	G	0.979019	-0.455631	0.0746309	6.2e-09	G	0.9776	-0.0698	0.1038	0.5017
1:216734001_A_T	rs17042848	31648709	1	216734001	T	A	-	-	-	2.7e-19	1	1	1	A	0.1846	-0.2448	0.0234	1.165e-25	T	0.816838	0.245885	0.0278717	6.1e-19	T	0.813	0.2429	0.0376	1.094e-10
1:217737629_C_T	rs68085857	31648709	1	217737629	C	T	-	-	-	2.5e-17	1	1	1	T	0.2336	0.2102	0.0212	4.173e-23	C	0.770324	-0.218251	0.0255286	7.3e-18	C	0.7602	-0.1975	0.0337	4.74e-09
1:227575051_A_G	rs12405317	31648709	1	227575051	A	G	-	-	-	7.2e-09	1	1	1	A	0.7718	-0.1357	0.0212	1.689e-10	A	0.770113	-0.138221	0.0255641	6.2e-08	G	0.2256	0.1318	0.0337	9.392e-05
1:236810177_C_G	rs1253232	31648709	1	236810177	G	C	-	-	-	2.1e-11	1	1	1	C	0.8047	0.1353	0.0229	3.635e-09	G	0.189378	-0.163942	0.0274216	4.5e-10	G	0.2049	-0.089	0.0367	0.01523
1:237723052_C_T	rs112812424	31648709	1	237723052	T	C	-	-	-	4e-15	1	1	1	T	0.9775	0.4918	0.061	7.728e-16	T	0.977398	0.561214	0.0722503	3.9e-15	C	0.0224	-0.3736	0.0994	0.0001699
1:26606291_C_T	rs61775082	31648709	1	26606291	C	T	-	-	-	2.7e-11	1	1	1	T	0.1264	-0.2042	0.0282	4.5e-13	C	0.879953	0.210477	0.0334382	3.7e-10	C	0.8629	0.1935	0.0458	2.391e-05
1:26717660_A_G	rs11588270	31648709	1	26717660	G	A	-	-	-	2.1e-09	1	1	1	A	0.1653	0.1368	0.0255	8.37e-08	G	0.833234	-0.174736	0.0293545	1.1e-09	G	0.8377	-0.0605	0.0439	0.1682
1:34929685_A_G	rs72654110	31648709	1	34929685	A	G	-	-	-	1.3e-08	0	0	0	A	0.905	0.1535	0.0306	5.283e-07	A	0.904707	0.150669	0.0365396	1.9e-05	G	0.0945	-0.158	0.0491	0.001283
1:38792712_C_T	rs1778044	31648709	1	38792712	C	T	-	-	-	2.2e-08	0	0	0	T	0.2803	-0.107	0.0198	6.885e-08	C	0.719855	0.137495	0.0238878	8.5e-09	C	0.7194	0.0595	0.0314	0.05847
1:39954548_A_AAT	rs375963061	31648709	1	39954548	A	AAT	-	-	-	3.4e-13	1	1	1	A	0.807	-0.1539	0.0289	1.031e-07	A	0.807186	-0.154569	0.0272845	5.6e-09	A	0.7887	-0.0672	0.3194	0.8333
1:43415346_G_T	rs710220	31648709	1	43415346	G	T	-	-	-	6.6e-14	1	1	1	T	0.2349	-0.1678	0.0214	4.1e-15	G	0.770434	0.167359	0.0255656	2.1e-11	G	0.7566	0.1685	0.0342	8.42e-07
1:43844602_C_T	rs11586272	31648709	1	43844602	T	C	-	-	-	9.1e-11	1	0	0	T	0.3593	-0.0775	0.019	4.701e-05	T	0.346565	-0.121617	0.0225227	1.8e-08	C	0.619	0.0021	0.031	0.9451
1:45012273_A_C	rs272564	31648709	1	45012273	A	C	-	-	-	1.6e-67	1	1	1	A	0.715	-0.3581	0.0203	1.723e-69	A	0.714093	-0.408844	0.0240159	1.1e-67	C	0.2835	0.2708	0.0332	3.531e-16
1:46912769_C_T	rs41294538	31648709	1	46912769	C	T	-	-	-	6.6e-09	1	1	1	T	0.032	0.2746	0.0544	4.504e-07	C	0.967839	-0.321075	0.0606673	2e-07	C	0.9685	-0.1605	0.1001	0.1089
1:54765727_C_T	rs10888844	31648709	1	54765727	C	T	-	-	-	4.7e-11	1	1	1	T	0.6747	-0.1492	0.0195	2.01e-14	C	0.324711	0.164049	0.023118	8.7e-13	C	0.3262	0.1241	0.0317	9.242e-05
1:54954044_G_T	rs190962	31648709	1	54954044	T	G	-	-	-	2.8e-12	1	1	1	T	0.1185	-0.1977	0.0286	4.436e-12	T	0.114997	-0.232264	0.0340815	1.5e-11	G	0.8757	0.1413	0.0459	0.002056
1:6279370_C_G	rs846111	31648709	1	6279370	G	C	-	-	-	1.5e-21	1	1	1	C	0.266	0.2343	0.0211	1.155e-28	G	0.732315	-0.230513	0.0242419	3.5e-22	G	0.7375	-0.242	0.0363	2.563e-11
1:6568674_A_G	rs6692157	31648709	1	6568674	A	G	-	-	-	1e-08	1	0	0	A	0.1746	0.1422	0.0244	5.267e-09	A	0.174495	0.148321	0.028526	4.3e-08	G	0.8251	-0.1311	0.0404	0.001193
1:66986867_C_T	rs17129012	31648709	1	66986867	C	T	-	-	-	1.7e-34	1	1	1	T	0.2176	-0.2904	0.0217	8.798e-41	C	0.785545	0.329805	0.0262545	2.4e-35	C	0.7777	0.2303	0.0342	1.556e-11
1:72764289_C_T	rs2815757	31648709	1	72764289	C	T	-	-	-	1.9e-13	1	1	1	T	0.8103	0.1452	0.0232	3.883e-10	C	0.190629	-0.122413	0.0273792	9.1e-06	C	0.1882	-0.1848	0.038	1.124e-06
1:80455308_A_C	rs74097128	31648709	1	80455308	C	A	-	-	-	9.1e-15	1	1	1	A	0.1446	0.1948	0.0256	2.631e-14	C	0.857228	-0.216293	0.0307546	2e-12	C	0.8526	-0.161	0.0406	7.305e-05
1:82268192_C_G	rs35363566	31648709	1	82268192	C	G	-	-	-	1.4e-09	0	1	0	C	0.9002	-0.1596	0.0303	1.398e-07	C	0.901822	-0.178311	0.0363508	3.6e-07	G	0.1025	0.1298	0.0483	0.007151
1:82599080_C_T	rs6679912	31648709	1	82599080	C	T	-	-	-	1.6e-10	0	0	0	T	0.2399	0.1325	0.0263	4.883e-07	C	0.75872	-0.132974	0.025338	2.9e-08	C	0.7889	-0.1231	0.1224	0.3147
1:87902704_C_G	rs6664718	31648709	1	87902704	G	C	-	-	-	1.5e-32	1	1	1	C	0.3752	-0.2299	0.0186	4.31e-35	G	0.629401	0.260999	0.0224291	2e-31	G	0.6177	0.1818	0.0294	6.28e-10
1:88405184_A_C	rs1155338	31648709	1	88405184	C	A	-	-	-	4.9e-09	1	1	1	A	0.158	-0.1813	0.0248	2.632e-13	C	0.843762	0.218679	0.0295182	1.7e-12	C	0.839	0.1195	0.04	0.002795
1:94063844_A_C	rs3767977	31648709	1	94063844	C	A	-	-	-	1.7e-10	1	1	1	A	0.2447	-0.1368	0.021	7.995e-11	C	0.75584	0.158325	0.025085	1.9e-10	C	0.7543	0.1015	0.0339	0.002725
1:10357806_C_G	rs112682076	31648709	1	10357806	G	C	-	-	-	4.3e-16	1	1	1	C	0.0097	0.9368	0.1033	1.172e-19	G	0.989788	-0.974449	0.109377	1.6e-18	G	0.992	-0.7975	0.2217	0.0003221
2:101579454_A_G	rs12622050	31648709	2	101579454	G	A	-	-	-	1.1e-13	1	1	1	A	0.2166	-0.2198	0.0221	3.291e-23	G	0.787878	0.213988	0.0263325	8.1e-17	G	0.7759	0.2294	0.0358	1.545e-10
2:111894720_C_T	rs17041868	31648709	2	111894720	T	C	-	-	-	1.3e-13	1	1	1	T	0.9311	-0.2748	0.0362	2.912e-14	T	0.933596	-0.315534	0.0430467	2.3e-13	C	0.0731	0.2076	0.0583	0.0003695
2:145783282_A_G	rs2246363	31648709	2	145783282	G	A	-	-	-	3.5e-08	0	0	0	A	0.754	-0.104	0.0209	6.191e-07	G	0.246442	0.126157	0.0249881	4.9e-07	G	0.2453	0.0685	0.0333	0.0395
2:148360603_C_T	rs13011875	31648709	2	148360603	C	T	-	-	-	6e-13	1	1	1	T	0.3935	-0.135	0.0185	2.59e-13	C	0.61419	0.167466	0.0221907	4.9e-15	C	0.5944	0.084	0.0293	0.00418
2:148525593_A_G	rs149096721	31648709	2	148525593	G	A	-	-	-	1.2e-08	1	0	0	A	0.3506	0.1109	0.0191	6.598e-09	G	0.645668	-0.133206	0.0225245	8.2e-09	G	0.656	-0.0719	0.0314	0.02221
2:159958894_C_T	rs55654562	31648709	2	159958894	C	T	-	-	-	6.7e-23	1	1	1	T	0.1942	-0.2061	0.0226	7.003e-20	C	0.80545	0.262612	0.027132	1.3e-21	C	0.8063	0.1171	0.0359	0.00112
2:162705966_A_G	rs35826432	31648709	2	162705966	A	G	-	-	-	3.7e-09	0	1	0	A	0.4309	-0.0759	0.0181	2.79e-05	A	0.433461	-0.11135	0.0217088	6.6e-07	G	0.5732	0.0193	0.0289	0.5049
2:17771217_T_TTCCTGTTCCTTC	rs748423495	31648709	2	17771217	TTCCTGTTCCTTC	T	-	-	-	2.7e-16	1	1	1	T	0.2864	-0.1645	0.0199	1.303e-16	TTCCTGTTCCTTC	0.716193	0.199578	0.0239014	2.5e-18	T	0.2906	-0.1094	0.0316	0.0005297
2:175529967_C_G	rs72914576	31648709	2	175529967	C	G	-	-	-	1.4e-08	1	0	0	C	0.8147	0.1608	0.0234	6.727e-12	C	0.822542	0.187677	0.0280855	8.9e-12	G	0.1979	-0.118	0.0374	0.001597
2:179721046_A_G	rs17362588	31648709	2	179721046	G	A	-	-	-	2.3e-162	1	1	1	A	0.087	1.0084	0.0324	1.08e-212	G	0.914685	-1.04097	0.038294	1e-162	G	0.9102	-0.9525	0.0529	2.119e-72
2:180102156_A_G	rs149118471	31648709	2	180102156	G	A	-	-	-	1.6e-16	1	0	0	A	0.0108	0.9014	0.1033	2.557e-18	G	0.988655	-0.875664	0.104242	1.5e-16	G	0.9925	-1.0688	0.28	0.0001353
2:184971137_T_TA	rs11454753	31648709	2	184971137	T	TA	-	-	-	1.1e-09	0	1	0	T	0.8825	-0.1416	0.0281	4.617e-07	T	0.880808	-0.172277	0.0331962	3.7e-07	T	0.8853	-0.0889	0.0459	0.05262
2:18725175_A_C	rs4462780	31648709	2	18725175	C	A	-	-	-	1.3e-09	1	1	1	A	0.645	-0.1204	0.019	2.392e-10	C	0.352425	0.115467	0.0225615	3.1e-07	C	0.3594	0.1286	0.0308	2.972e-05
2:187588880_A_G	rs35986780	31648709	2	187588880	A	G	-	-	-	2.1e-09	1	0	0	A	0.7067	-0.1493	0.0197	3.193e-14	A	0.709638	-0.163476	0.0236546	4.5e-12	G	0.2979	0.127	0.0312	4.708e-05
2:188242369_A_G	rs62172372	31648709	2	188242369	A	G	-	-	-	1.8e-37	1	1	1	A	0.8002	-0.3326	0.0229	1.016e-47	A	0.808262	-0.368745	0.027603	7.2e-43	G	0.2124	0.2764	0.0363	2.462e-14
2:191248275_C_T	rs1899258	31648709	2	191248275	T	C	-	-	-	4.8e-12	1	1	1	T	0.4366	0.1182	0.0181	6.088e-11	T	0.432816	0.146809	0.021814	8.3e-12	C	0.5575	-0.0742	0.0285	0.009268
2:196046543_A_G	rs59522947	31648709	2	196046543	A	G	-	-	-	2.1e-10	1	1	1	A	0.8414	-0.1627	0.0245	3.403e-11	A	0.844163	-0.194508	0.0296002	2.5e-11	G	0.1629	0.1135	0.0388	0.003437
2:201195602_C_T	rs295114	31648709	2	201195602	C	T	-	-	-	1e-15	1	1	1	T	0.4178	0.1548	0.0184	3.291e-17	C	0.582659	-0.164617	0.0217206	2.1e-14	C	0.5813	-0.1381	0.0299	3.82e-06
2:203156422_C_T	rs113075198	31648709	2	203156422	C	T	-	-	-	1.3e-08	1	0	0	T	0.3118	-0.1266	0.0196	9.584e-11	C	0.699757	0.130456	0.0234369	3.5e-09	C	0.6697	0.1204	0.0312	0.0001121
2:215298899_C_G	rs10193779	31648709	2	215298899	G	C	-	-	-	2.1e-08	0	0	0	C	0.5495	-0.0748	0.0179	2.982e-05	G	0.449516	0.0986173	0.0215869	3.7e-06	G	0.4521	0.0378	0.0284	0.1839
2:218683154_A_G	rs2571445	31648709	2	218683154	A	G	-	-	-	1.8e-08	1	0	0	A	0.3866	-0.1016	0.0187	5.271e-08	A	0.391287	-0.112301	0.0219371	8.5e-08	G	0.6218	0.0826	0.0308	0.007212
2:220299018_C_T	rs13386459	31648709	2	220299018	T	C	-	-	-	3.4e-40	1	1	1	T	0.6182	-0.2679	0.0195	4.601e-43	T	0.614509	-0.277134	0.0219569	1.3e-37	C	0.3733	0.2469	0.0349	1.399e-12
2:220338065_C_T	rs4674402	31648709	2	220338065	T	C	-	-	-	1e-18	1	0	0	T	0.651	-0.1915	0.0191	1.043e-23	T	0.65377	-0.196237	0.0225783	9.3e-19	C	0.3537	0.1835	0.0311	3.501e-09
2:228168099_A_C	rs62279163	31648709	2	228168099	C	A	-	-	-	5.2e-25	1	1	1	A	0.3334	-0.2288	0.0189	7.589e-34	C	0.670692	0.241445	0.0228653	1.4e-26	C	0.6605	0.2098	0.0296	1.446e-12
2:232264914_G_T	rs13025087	31648709	2	232264914	G	T	-	-	-	4.6e-37	1	1	1	T	0.2413	-0.3168	0.0209	9.146e-52	G	0.764919	0.348866	0.0252703	1.2e-42	G	0.7492	0.2675	0.033	4.804e-16
2:26932031_C_T	rs2586886	31648709	2	26932031	C	T	-	-	-	2e-08	1	0	0	T	0.6045	0.1584	0.0186	1.912e-17	C	0.395758	-0.177024	0.0219246	1.5e-15	C	0.3951	-0.1256	0.0307	4.203e-05
2:27730940_C_T	rs1260326	31648709	2	27730940	T	C	-	-	-	2.9e-37	1	1	1	T	0.3887	0.292	0.0188	1.638e-54	T	0.388069	0.308134	0.022056	1.7e-46	C	0.6103	-0.2632	0.031	2.04e-17
2:28858441_A_ACATAGTGTCTGCAGGCTTTGGCTGATGTTCC	rs71403617	31648709	2	28858441	A	ACATAGTGTCTGCAGGCTTTGGCTGATGTTCC	-	-	-	1e-10	1	1	1	A	0.8097	0.1744	0.0286	1.082e-09	A	0.809295	0.179969	0.0275161	4.8e-11	A	0.8186	0.0575	0.1333	0.6664
2:37078839_A_G	rs3770781	31648709	2	37078839	A	G	-	-	-	1.1e-09	1	1	1	A	0.5554	0.1309	0.0182	6.573e-13	A	0.558036	0.142823	0.0216665	1.9e-10	G	0.449	-0.1111	0.0294	0.0001569
2:46528695_A_AAG	rs146111768	31648709	2	46528695	A	AAG	-	-	-	3.3e-12	1	1	1	A	0.452	-0.1478	0.0182	5.291e-16	A	0.449542	-0.141984	0.0216643	2.7e-11	A	0.4562	-0.1574	0.0295	9.663e-08
2:48023873_G_T	rs2159886	31648709	2	48023873	T	G	-	-	-	3.4e-13	1	1	1	T	0.7026	-0.1232	0.0196	3.599e-10	T	0.705223	-0.147614	0.0236076	8.8e-11	G	0.3014	0.0847	0.0312	0.006703
2:48441550_C_T	rs6545024	31648709	2	48441550	C	T	-	-	-	4.7e-09	1	0	0	T	0.628	0.0804	0.0185	1.364e-05	C	0.368385	-0.117022	0.0222478	1.3e-07	C	0.3776	-0.0232	0.0293	0.4277
2:53866241_A_G	rs55861447	31648709	2	53866241	A	G	-	-	-	3.4e-09	1	0	0	A	0.641	-0.0993	0.0188	1.294e-07	A	0.638065	-0.144404	0.0225325	1.6e-10	G	0.3543	0.0272	0.03	0.3648
2:5856582_C_CAT	rs201394424	31648709	2	5856582	C	CAT	-	-	-	2.3e-08	0	0	0	CAT	0.2603	-0.1144	0.0261	1.196e-05	C	0.739684	0.115079	0.0246376	1.1e-06	C	0.7416	0.0177	0.3006	0.953
2:58961136_C_T	rs17049712	31648709	2	58961136	C	T	-	-	-	2.3e-09	0	0	0	T	0.2954	0.0868	0.0196	9.497e-06	C	0.707824	-0.0833529	0.0237188	0.00023	C	0.6996	-0.092	0.0308	0.002822
2:59315020_A_G	rs4287756	31648709	2	59315020	A	G	-	-	-	2.9e-08	1	0	0	A	0.2935	0.0947	0.0248	0.0001312	A	0.294418	0.0845476	0.0237916	0.00083	G	0.7271	-0.3132	0.1166	0.007254
2:60026906_A_T	rs1442875	31648709	2	60026906	T	A	-	-	-	7.5e-21	1	1	1	A	0.6134	-0.1894	0.0184	8.2e-25	T	0.389435	0.214593	0.0222159	6.3e-22	T	0.3821	0.1506	0.0291	2.29e-07
2:64870889_A_G	rs2422276	31648709	2	64870889	A	G	-	-	-	1.5e-10	1	1	1	A	0.5538	-0.1295	0.0184	1.984e-12	A	0.548982	-0.128781	0.0216251	1.8e-09	G	0.4375	0.1309	0.0304	1.641e-05
2:66725062_C_T	rs62144050	31648709	2	66725062	T	C	-	-	-	8.3e-18	1	1	1	T	0.7179	-0.1839	0.0231	1.626e-15	T	0.715686	-0.213589	0.0237409	7.2e-20	C	0.2709	0.0337	0.0563	0.5499
2:86855977_A_G	rs308911	31648709	2	86855977	A	G	-	-	-	3.5e-08	1	0	0	A	0.2837	0.0846	0.0201	2.467e-05	A	0.2853	0.0911603	0.0238153	9.4e-05	G	0.7189	-0.0736	0.0325	0.02363
2:96795714_A_G	rs749459	31648709	2	96795714	G	A	-	-	-	6.7e-12	1	1	1	A	0.3751	0.1545	0.0186	1.109e-16	G	0.628342	-0.173134	0.0222001	4.6e-16	G	0.6193	-0.1238	0.03	3.646e-05
3:122069823_A_G	rs80158681	31648709	3	122069823	G	A	-	-	-	2.1e-25	1	1	1	A	0.2675	0.195	0.0203	6.586e-22	G	0.734751	-0.24209	0.0243725	1.6e-23	G	0.729	-0.1211	0.0322	0.0001677
3:141140366_A_T	rs6763927	31648709	3	141140366	A	T	-	-	-	3e-20	1	1	1	A	0.5559	-0.1842	0.0181	2.129e-24	A	0.556536	-0.199843	0.0217655	2.7e-20	T	0.4451	0.1598	0.0286	2.332e-08
3:14291679_C_T	rs11710541	31648709	3	14291679	T	C	-	-	-	3e-09	0	0	0	T	0.6623	-0.1175	0.0189	5.043e-10	T	0.659105	-0.146414	0.0227787	2.1e-10	C	0.3327	0.0727	0.0299	0.01516
3:15528576_A_C	rs12631578	31648709	3	15528576	A	C	-	-	-	4.1e-14	1	1	1	A	0.7071	0.1463	0.0201	3.779e-13	A	0.707001	0.162459	0.0237589	1e-11	C	0.2926	-0.1182	0.033	0.0003381
3:156540500_C_T	rs2321395	31648709	3	156540500	T	C	-	-	-	8.6e-12	1	1	1	T	0.3131	-0.1295	0.0193	1.963e-11	T	0.308907	-0.163044	0.0232763	2.6e-12	C	0.6805	0.0776	0.0305	0.01102
3:156821808_C_T	rs6441111	31648709	3	156821808	C	T	-	-	-	1.8e-09	1	1	1	T	0.4913	0.1257	0.0183	5.704e-12	C	0.511588	-0.116755	0.0214918	4.8e-08	C	0.5036	-0.1414	0.03	2.414e-06
3:168871394_A_G	rs9809990	31648709	3	168871394	A	G	-	-	-	1.4e-10	1	1	1	A	0.5112	-0.1597	0.0185	5.261e-18	A	0.506818	-0.159038	0.0217709	4.5e-13	G	0.4811	0.1609	0.0303	1.053e-07
3:171785168_C_G	rs9647379	31648709	3	171785168	G	C	-	-	-	2.3e-33	1	1	1	C	0.398	0.2477	0.0188	8.992e-40	G	0.598376	-0.254342	0.0220733	4.3e-32	G	0.6083	-0.2359	0.0309	2.128e-14
3:172115640_A_T	rs495702	31648709	3	172115640	A	T	-	-	-	8.9e-16	1	1	1	A	0.2638	0.1526	0.0207	1.709e-13	A	0.267142	0.198045	0.0243832	9e-17	T	0.742	-0.0729	0.034	0.0319
3:177228689_C_G	rs7649653	31648709	3	177228689	G	C	-	-	-	3.5e-09	0	1	0	C	0.108	-0.1591	0.0292	5.162e-08	G	0.898574	0.185103	0.0356195	1e-07	G	0.8823	0.121	0.0454	0.007724
3:179173224_A_T	rs7634416	31648709	3	179173224	A	T	-	-	-	1.6e-41	1	1	1	A	0.7992	0.3897	0.0226	1.151e-66	A	0.806043	0.38186	0.0274472	8.8e-45	T	0.2111	-0.4013	0.0353	6.264e-30
3:183998579_C_T	rs843376	31648709	3	183998579	T	C	-	-	-	2.6e-12	1	1	1	T	0.4057	-0.1393	0.0183	2.942e-14	T	0.408417	-0.169288	0.0219742	2.6e-14	C	0.5986	0.0915	0.0292	0.00175
3:18426851_A_G	rs9758860	31648709	3	18426851	A	G	-	-	-	2.2e-17	1	1	1	A	0.4073	0.1582	0.0182	2.949e-18	A	0.402907	0.183251	0.0218957	1.8e-17	G	0.5859	-0.1195	0.0287	3.217e-05
3:24018503_G_GT	rs55792500	31648709	3	24018503	G	GT	-	-	-	4.5e-08	1	0	0	G	0.2547	-0.1048	0.0206	3.738e-07	G	0.251676	-0.131196	0.0248127	2.4e-07	G	0.2594	-0.0635	0.0327	0.05238
3:24462852_T_TA	rs60203372	31648709	3	24462852	T	TA	-	-	-	1.3e-26	1	1	1	T	0.7067	0.2525	0.0254	2.475e-23	T	0.706809	0.24784	0.0239348	5.4e-26	T	0.6954	0.8516	0.2864	0.002951
3:38621237_C_G	rs41312411	31648709	3	38621237	C	G	-	-	-	1.8e-24	1	1	1	C	0.8529	0.2768	0.0257	4.36e-27	C	0.851851	0.328857	0.030489	4.3e-27	G	0.1453	-0.1894	0.0416	5.418e-06
3:38767315_C_T	rs6801957	31648709	3	38767315	T	C	-	-	-	3.3e-25	1	1	1	T	0.4	-0.1988	0.0184	4.041e-27	T	0.400525	-0.234435	0.0219594	4.1e-26	C	0.6009	0.1401	0.0297	2.368e-06
3:39226127_C_T	rs3732383	31648709	3	39226127	C	T	-	-	-	1.7e-09	1	0	0	T	0.2198	0.1128	0.022	2.866e-07	C	0.779845	-0.144719	0.0259064	2e-08	C	0.7807	-0.0571	0.0361	0.1136
3:41211575_A_G	rs9821710	31648709	3	41211575	G	A	-	-	-	2.1e-08	0	0	0	A	0.5046	0.0774	0.018	1.631e-05	G	0.489089	-0.101606	0.0214945	6.7e-07	G	0.5056	-0.0385	0.0287	0.1801
3:42758931_A_T	rs2372071	31648709	3	42758931	T	A	-	-	-	1.6e-14	1	1	1	A	0.4771	-0.1131	0.018	3.143e-10	T	0.517738	0.133586	0.021584	3.3e-10	T	0.5311	0.0807	0.0286	0.004795
3:47418971_A_G	rs34622620	31648709	3	47418971	G	A	-	-	-	3.1e-14	1	0	0	A	0.1295	0.1712	0.0293	5.233e-09	G	0.867188	-0.206273	0.0326518	4.7e-11	G	0.8788	-0.0845	0.0541	0.1185
3:49734040_G_T	rs12496226	31648709	3	49734040	G	T	-	-	-	2.9e-37	1	1	1	T	0.3101	0.2323	0.0193	2.35e-33	G	0.683973	-0.260883	0.0230893	4.4e-31	G	0.6995	-0.1862	0.0309	1.768e-09
3:50967904_A_G	rs7429494	31648709	3	50967904	A	G	-	-	-	4.4e-10	1	0	0	A	0.1233	-0.1928	0.0279	5.111e-12	A	0.121649	-0.218709	0.0328806	3.5e-12	G	0.8737	0.1472	0.0459	0.001349
3:53286860_C_CT	rs529974283	31648709	3	53286860	C	CT	-	-	-	1.2e-22	1	1	1	CT	0.3498	-0.2208	0.0241	5.487e-20	C	0.650448	0.220034	0.0227575	6.2e-24	C	0.6219	0.3175	0.2693	0.2384
3:66496592_C_T	rs9849546	31648709	3	66496592	C	T	-	-	-	8.5e-14	1	1	1	T	0.2518	-0.1548	0.0212	3.183e-13	C	0.75403	0.181337	0.025413	1.5e-12	C	0.7389	0.112	0.034	0.0009954
3:69413121_A_G	rs1843045	31648709	3	69413121	G	A	-	-	-	6.4e-19	1	1	1	A	0.2978	0.1949	0.0198	8.385e-23	G	0.709573	-0.211464	0.0239355	7e-21	G	0.6908	-0.1695	0.0313	6.327e-08
3:73262379_C_T	rs17010608	31648709	3	73262379	T	C	-	-	-	6e-09	1	1	1	T	0.6419	-0.1281	0.0188	9.688e-12	T	0.639543	-0.128931	0.022459	3.9e-09	C	0.3543	0.1268	0.0302	2.647e-05
3:74778833_A_T	rs13092297	31648709	3	74778833	T	A	-	-	-	2e-08	0	0	0	A	0.4259	-0.0913	0.0184	6.807e-07	T	0.574627	0.110897	0.0219393	9.9e-08	T	0.5732	0.0593	0.0295	0.04428
3:85397049_C_T	rs76508707	31648709	3	85397049	C	T	-	-	-	6.6e-12	1	1	1	T	0.4818	0.125	0.0184	1.049e-11	C	0.519218	-0.146656	0.0216822	9.1e-12	C	0.5165	-0.0873	0.0301	0.003755
3:8603243_C_T	rs165177	31648709	3	8603243	T	C	-	-	-	1.3e-10	1	1	1	T	0.253	-0.1864	0.0212	1.509e-18	T	0.251269	-0.170975	0.0250036	2.1e-12	C	0.7441	0.2134	0.0348	8.271e-10
3:94095706_A_G	rs56853116	31648709	3	94095706	A	G	-	-	-	1.5e-10	0	1	0	A	0.7161	-0.0928	0.0199	3.107e-06	A	0.712775	-0.107409	0.0237646	1.1e-05	G	0.2785	0.069	0.0319	0.03056
4:10164027_C_T	rs6816215	31648709	4	10164027	C	T	-	-	-	2.1e-08	0	0	0	T	0.3099	0.071	0.0194	0.0002614	C	0.685409	-0.116773	0.0232576	8e-08	C	0.6977	0.0028	0.0311	0.9275
4:1217981_A_G	rs34490749	31648709	4	1217981	A	G	-	-	-	6.7e-09	1	1	1	A	0.561	0.1267	0.018	2.121e-12	A	0.560578	0.136806	0.0216963	5.7e-11	G	0.4383	-0.1109	0.0286	0.0001061
4:144359490_C_T	rs28925904	31648709	4	144359490	C	T	-	-	-	1.2e-09	0	1	0	T	0.0235	0.3119	0.0661	2.416e-06	C	0.976249	-0.374797	0.070506	4.7e-08	C	0.9776	-0.0923	0.1388	0.5064
4:148362917_A_G	rs1560229	31648709	4	148362917	G	A	-	-	-	2.4e-08	1	0	0	A	0.1499	0.1053	0.0263	6.268e-05	G	0.866361	-0.138533	0.032418	9.5e-06	G	0.8275	-0.0591	0.0403	0.1427
4:148970471_A_G	rs34957409	31648709	4	148970471	A	G	-	-	-	7.2e-31	1	1	1	A	0.8422	0.3014	0.0249	1.258e-33	A	0.845015	0.345786	0.0299831	8.2e-32	G	0.1623	-0.2317	0.0396	5.057e-09
4:150116260_C_CTT	rs753097688	31648709	4	150116260	CTT	C	-	-	-	9.7e-10	1	0	0	CTT	0.9382	-0.1928	0.0386	5.769e-07	CTT	0.941703	-0.252406	0.0468796	7.3e-08	C	0.067	0.1042	0.0602	0.08318
4:154385925_C_G	rs7687559	31648709	4	154385925	G	C	-	-	-	1.6e-10	1	1	1	C	0.4081	0.1137	0.0184	6.166e-10	G	0.592553	-0.14733	0.0220832	7.9e-12	G	0.5909	-0.0607	0.0292	0.03771
4:159869280_C_T	rs62354781	31648709	4	159869280	T	C	-	-	-	1e-09	1	1	1	T	0.7139	0.1333	0.0199	2.09e-11	T	0.711812	0.162243	0.0238591	3.9e-12	C	0.2828	-0.0872	0.0317	0.005899
4:169687725_G_T	rs7696431	31648709	4	169687725	T	G	-	-	-	2.4e-17	1	1	1	T	0.5118	-0.1825	0.018	3.024e-24	T	0.514165	-0.193732	0.0216023	3.5e-20	G	0.4918	0.1648	0.0285	7.422e-09
4:174462531_C_G	rs2289517	31648709	4	174462531	G	C	-	-	-	1.7e-09	1	0	0	C	0.3392	-0.1255	0.0189	3.36e-11	G	0.657781	0.145547	0.0226966	5.4e-11	G	0.6657	0.0936	0.0302	0.001904
4:174584663_C_G	rs17059668	31648709	4	174584663	C	G	-	-	-	1.5e-09	1	1	1	C	0.908	0.2212	0.0329	1.768e-11	C	0.91675	0.247534	0.0395552	4.7e-10	G	0.1058	-0.1798	0.0522	0.0005732
4:175225452_A_G	rs4695918	31648709	4	175225452	G	A	-	-	-	1.3e-08	1	0	0	A	0.5458	0.089	0.0183	1.227e-06	G	0.453921	-0.0974486	0.0216057	2e-06	G	0.4547	-0.0741	0.0301	0.01398
4:17908311_C_CT	rs542058258	31648709	4	17908311	C	CT	-	-	-	2.4e-12	1	1	1	CT	0.153	0.151	0.0324	3.066e-06	C	0.846923	-0.153084	0.0305165	3.2e-07	C	0.8553	0.1453	0.3832	0.7046
4:23992608_C_CAATCAAACTATCCTCATAAG	rs770916406	31648709	4	23992608	CAATCAAACTATCCTCATAAG	C	-	-	-	1.8e-17	1	1	1	CAATCAAACTATCCTCATAAG	0.5635	-0.164	0.0183	4.033e-19	CAATCAAACTATCCTCATAAG	0.552728	-0.181863	0.0218457	5.9e-18	C	0.4188	0.1344	0.0296	5.764e-06
4:3141488_A_G	rs363063	31648709	4	3141488	G	A	-	-	-	1.4e-08	0	0	0	A	0.4167	-0.0926	0.0181	3.265e-07	G	0.58477	0.0874454	0.0218539	0.00011	G	0.5809	0.1007	0.0287	0.0004403
4:57002089_A_G	rs28463663	31648709	4	57002089	G	A	-	-	-	4e-08	0	0	0	A	0.0518	-0.1944	0.0422	4.006e-06	G	0.951016	0.248779	0.0500671	1.1e-06	G	0.9434	0.1033	0.0683	0.1301
4:65302848_A_G	rs76631792	31648709	4	65302848	G	A	-	-	-	3.1e-09	0	1	0	A	0.0243	-0.3659	0.0722	3.958e-07	G	0.98298	0.406415	0.0859463	5.6e-06	G	0.9638	0.2991	0.1163	0.01012
4:77034735_C_T	rs56102101	31648709	4	77034735	C	T	-	-	-	5.4e-11	0	1	0	T	0.1548	0.1197	0.0248	1.332e-06	C	0.850712	-0.145214	0.0301757	9.8e-07	C	0.8372	-0.0823	0.0385	0.0326
4:83244302_A_G	rs7673637	31648709	4	83244302	A	G	-	-	-	2.8e-13	1	1	1	A	0.7838	-0.1587	0.0218	3.696e-13	A	0.78649	-0.197088	0.0262855	3.2e-14	G	0.2203	0.0987	0.0346	0.004331
4:95197110_A_G	rs13131414	31648709	4	95197110	G	A	-	-	-	1.1e-10	1	1	1	A	0.2386	0.1159	0.0217	9.128e-08	G	0.76456	-0.139896	0.0255541	6.9e-08	G	0.7559	-0.0739	0.0356	0.03791
5:107614035_G_T	rs1849012	31648709	5	107614035	G	T	-	-	-	2.7e-13	0	1	0	T	0.2017	-0.1085	0.0224	1.28e-06	G	0.796679	0.150943	0.0266923	1.1e-08	G	0.801	0.0386	0.0361	0.2842
5:108067849_A_C	rs113877323	31648709	5	108067849	A	C	-	-	-	4.2e-08	0	0	0	A	0.9259	0.1483	0.0345	1.715e-05	A	0.928421	0.183499	0.0418397	3.5e-06	C	0.078	-0.0954	0.054	0.07734
5:111096552_C_G	rs255900	31648709	5	111096552	G	C	-	-	-	2e-11	1	1	1	C	0.1718	-0.1593	0.0242	4.85e-11	G	0.829067	0.192338	0.0288339	5.5e-12	G	0.8268	0.1046	0.0391	0.007373
5:112486175_A_G	rs10068491	31648709	5	112486175	A	G	-	-	-	1.8e-09	0	1	0	A	0.7097	-0.0825	0.0199	3.509e-05	A	0.710645	-0.119196	0.0238559	3.2e-07	G	0.2917	0.0234	0.0319	0.4634
5:122692653_G_GT	rs34984032	31648709	5	122692653	G	GT	-	-	-	3.4e-14	1	1	1	G	0.5358	-0.172	0.0179	7.553e-22	G	0.535517	-0.17959	0.0215479	1.5e-17	G	0.5363	-0.1602	0.0284	1.597e-08
5:128241908_A_G	rs2545018	31648709	5	128241908	A	G	-	-	-	7.6e-13	1	1	1	A	0.2023	0.1499	0.0225	2.696e-11	A	0.201186	0.183303	0.0268413	9.2e-12	G	0.7958	-0.0953	0.0362	0.008458
5:132441799_G_T	rs571173399	31648709	5	132441799	T	G	-	-	-	3.6e-08	0	0	0	T	0.7692	0.1149	0.0272	2.382e-05	T	0.769259	0.114975	0.0256568	4.3e-06	G	0.2405	-0.1074	0.3045	0.7242
5:136716724_A_G	rs1229741	31648709	5	136716724	G	A	-	-	-	7.9e-11	1	0	0	A	0.3427	-0.1126	0.019	3.03e-09	G	0.649289	0.140874	0.0226654	2.5e-10	G	0.6703	0.0665	0.0305	0.02909
5:137406243_C_G	rs542777476	31648709	5	137406243	C	G	-	-	-	1.3e-32	1	1	1	C	0.828	0.3589	0.0297	1.337e-33	C	0.826643	0.355856	0.0284126	4.7e-36	G	0.135	-0.4454	0.1589	0.005075
5:142441794_C_T	rs3776331	31648709	5	142441794	T	C	-	-	-	4.4e-18	1	1	1	T	0.2797	-0.1486	0.0205	4.102e-13	T	0.279447	-0.166056	0.023963	3.6e-12	C	0.7197	0.1168	0.0341	0.0006074
5:148038156_C_T	rs9325110	31648709	5	148038156	T	C	-	-	-	1.4e-08	1	0	0	T	0.4167	0.1015	0.0186	4.744e-08	T	0.410742	0.11497	0.0221223	2.2e-07	C	0.5735	-0.0792	0.03	0.008193
5:172670611_C_CT	rs35564079	31648709	5	172670611	C	CT	-	-	-	3.2e-30	1	1	1	CT	0.2925	-0.2908	0.0203	2.376e-46	C	0.713044	0.279857	0.0240544	1.5e-30	C	0.6979	0.3096	0.0332	1.249e-20
5:173329285_C_T	rs62376951	31648709	5	173329285	T	C	-	-	-	3.1e-11	1	1	1	T	0.8496	-0.1559	0.0253	6.753e-10	T	0.850442	-0.183458	0.0302328	4.3e-09	C	0.1517	0.1116	0.0404	0.005749
5:175706261_A_C	rs13160463	31648709	5	175706261	C	A	-	-	-	5.9e-09	1	1	1	A	0.5964	0.1172	0.0189	5.501e-10	C	0.398454	-0.134438	0.0219161	5.6e-10	C	0.4134	-0.0843	0.0319	0.008283
5:176730755_C_G	rs17077806	31648709	5	176730755	G	C	-	-	-	6.8e-09	0	0	0	C	0.0296	0.379	0.0665	1.213e-08	G	0.970332	-0.37183	0.0639178	2e-08	G	0.9716	-0.535	0.3149	0.08934
5:30896358_A_C	rs1921102	31648709	5	30896358	A	C	-	-	-	9.7e-14	1	1	1	A	0.4178	0.1691	0.0181	9.222e-21	A	0.415675	0.176088	0.0217744	4.1e-15	C	0.5789	-0.1582	0.0287	3.392e-08
5:50938910_C_T	rs2448421	31648709	5	50938910	T	C	-	-	-	4.9e-14	1	1	1	T	0.8166	0.1643	0.0232	1.278e-12	T	0.823358	0.194323	0.0282203	4.5e-13	C	0.1932	-0.1203	0.036	0.0008297
5:56120769_A_T	rs2591952	31648709	5	56120769	T	A	-	-	-	1.6e-09	0	1	0	A	0.7691	0.0982	0.0229	1.762e-05	T	0.18722	-0.157666	0.0277485	5.1e-09	T	0.2965	-0.009	0.0358	0.8007
5:75037086_A_G	rs56912706	31648709	5	75037086	A	G	-	-	-	1.2e-11	1	1	1	A	0.6127	-0.1374	0.0185	1.263e-13	A	0.616346	-0.200443	0.0223058	9e-19	G	0.3929	0.0387	0.0294	0.1879
5:76600700_A_G	rs13182285	31648709	5	76600700	G	A	-	-	-	5e-10	1	0	0	A	0.2783	0.1175	0.0201	5.131e-09	G	0.723093	-0.133538	0.024141	3.2e-08	G	0.7194	-0.0921	0.032	0.004051
5:79037842_C_T	rs74470287	31648709	5	79037842	C	T	-	-	-	1.2e-15	1	1	1	T	0.137	0.2467	0.0261	3.539e-21	C	0.863807	-0.248729	0.0313327	3.2e-15	C	0.8618	-0.2434	0.0416	4.975e-09
5:79103266_A_G	rs76837855	31648709	5	79103266	A	G	-	-	-	6.8e-09	1	0	0	A	0.973	0.3098	0.0567	4.572e-08	A	0.972347	0.403113	0.0657522	1.2e-09	G	0.0258	-0.1319	0.0957	0.168
5:81134423_C_T	rs12518812	31648709	5	81134423	C	T	-	-	-	7.4e-13	1	1	1	T	0.2661	0.1597	0.0206	1.013e-14	C	0.73746	-0.17002	0.0245273	3.9e-12	C	0.7279	-0.1425	0.0334	2.008e-05
5:88001798_C_T	rs2161228	31648709	5	88001798	C	T	-	-	-	4.5e-10	0	1	0	T	0.1136	0.0867	0.029	0.002799	C	0.893941	-0.129122	0.0352076	0.00032	C	0.8751	-0.0232	0.0454	0.6092
5:89392719_T_TCA	rs201945773	31648709	5	89392719	T	TCA	-	-	-	4.7e-13	1	1	1	T	0.9786	-0.4692	0.0667	1.936e-12	T	0.978967	-0.541591	0.0766245	2.5e-12	T	0.9779	-0.3233	0.1146	0.004771
5:90348787_A_G	rs2697542	31648709	5	90348787	G	A	-	-	-	2.5e-10	1	0	0	A	0.7831	0.1275	0.0218	5.12e-09	G	0.217651	-0.161943	0.0260685	3.7e-10	G	0.2158	-0.0716	0.035	0.04079
5:98169263_C_G	rs331930	31648709	5	98169263	G	C	-	-	-	3.4e-08	0	0	0	C	0.292	0.1034	0.0198	1.858e-07	G	0.704904	-0.145627	0.0236605	4.7e-10	G	0.7131	-0.0343	0.0319	0.2817
6:105791662_A_C	rs146643077	31648709	6	105791662	C	A	-	-	-	4.9e-16	1	1	1	A	0.0581	0.3488	0.039	3.763e-19	C	0.943524	-0.351468	0.0468133	1.6e-13	C	0.9393	-0.3447	0.0621	2.849e-08
6:117798235_G_T	rs13202333	31648709	6	117798235	G	T	-	-	-	4e-08	1	0	0	T	0.287	-0.0818	0.0196	3.088e-05	G	0.712978	0.123409	0.0237354	5.2e-07	G	0.713	0.0183	0.0309	0.5546
6:118667522_C_T	rs11153730	31648709	6	118667522	T	C	-	-	-	3.3e-132	1	1	1	T	0.518	0.4619	0.018	9.19e-145	T	0.516009	0.511513	0.0215005	6e-128	C	0.4788	-0.3806	0.029	1.982e-39
6:119113317_C_T	rs9401090	31648709	6	119113317	T	C	-	-	-	5.3e-17	1	0	0	T	0.7453	0.142	0.0208	8.75e-12	T	0.741522	0.180297	0.0245702	2e-13	C	0.2482	-0.0759	0.034	0.02557
6:119496395_C_CTT	rs535003291	31648709	6	119496395	C	CTT	-	-	-	1.4e-11	1	0	0	CTT	0.1891	0.1547	0.0296	1.657e-07	C	0.810931	-0.158484	0.0278894	1.3e-08	C	0.8124	0.3106	0.3263	0.3412
6:120678414_A_G	rs117021457	31648709	6	120678414	A	G	-	-	-	4.8e-15	0	0	0	A	0.9654	0.3731	0.0518	5.724e-13	A	0.966579	0.390566	0.0612014	3.6e-11	G	0.0366	-0.3431	0.0845	4.941e-05
6:121777942_A_G	rs112387830	31648709	6	121777942	A	G	-	-	-	1.1e-76	1	0	0	A	0.4656	-0.3592	0.0181	1.222e-87	A	0.470919	-0.395356	0.0215051	9.5e-78	G	0.5432	0.2988	0.0293	2.199e-24
6:122089704_A_AT	rs58730006	31648709	6	122089704	A	AT	-	-	-	8e-172	1	1	1	A	0.8902	-0.9321	0.0294	9.67e-221	A	0.898654	-0.975725	0.0357711	7e-167	A	0.8776	-0.8677	0.0458	5.761e-80
6:127436895_G_GA	rs5879832	31648709	6	127436895	G	GA	-	-	-	4.2e-08	1	0	0	G	0.4802	-0.1142	0.023	6.647e-07	G	0.48003	-0.115938	0.0216722	1.2e-07	G	0.5091	0.1179	0.266	0.6575
6:134226147_C_T	rs162185	31648709	6	134226147	T	C	-	-	-	2.4e-17	1	1	1	T	0.5875	-0.21	0.0187	2.576e-29	T	0.586983	-0.216934	0.0219262	2.4e-23	C	0.4116	0.1977	0.0309	1.516e-10
6:141889849_C_G	rs7452430	31648709	6	141889849	G	C	-	-	-	3.2e-09	0	1	0	C	0.5083	0.1049	0.0226	3.476e-06	G	0.491215	-0.109793	0.0217577	3.6e-07	G	0.5008	-0.0058	0.1027	0.9551
6:148023301_C_T	rs6926265	31648709	6	148023301	T	C	-	-	-	2.1e-08	1	0	0	T	0.3184	-0.0658	0.0195	0.0007627	T	0.319328	-0.118615	0.0233111	2.8e-07	C	0.683	-0.0206	0.0314	0.5126
6:16739416_A_AC	rs201136395	31648709	6	16739416	A	AC	-	-	-	8.4e-14	1	1	1	A	0.8542	0.1951	0.0328	2.79e-09	A	0.854192	0.193328	0.0309712	3.6e-10	A	0.8507	0.4325	0.3741	0.2477
6:19299370_A_G	rs7756755	31648709	6	19299370	G	A	-	-	-	3e-08	0	0	0	A	0.1431	-0.129	0.0262	8.573e-07	G	0.85557	0.160744	0.030483	1.2e-07	G	0.8593	0.0693	0.0441	0.1163
6:22123002_C_T	rs7748819	31648709	6	22123002	C	T	-	-	-	8.1e-12	1	1	1	T	0.4442	-0.1463	0.0181	5.64e-16	C	0.558691	0.165402	0.0216766	5.7e-14	C	0.5513	0.116	0.0288	5.589e-05
6:26123502_C_T	rs115740542	31648709	6	26123502	T	C	-	-	-	6.7e-10	1	1	1	T	0.933	-0.2964	0.037	1.212e-15	T	0.929735	-0.318108	0.0422867	2.9e-14	C	0.06	0.2509	0.0646	0.0001017
6:33768897_A_G	rs2281820	31648709	6	33768897	A	G	-	-	-	2.2e-13	1	1	1	A	0.421	0.1239	0.0185	2.019e-11	A	0.41963	0.162654	0.021748	6.7e-15	G	0.5765	-0.0557	0.0304	0.06706
6:34717578_C_T	rs61431557	31648709	6	34717578	C	T	-	-	-	6.1e-14	1	1	1	T	0.1371	-0.245	0.026	4.595e-21	C	0.865152	0.277238	0.0313697	1.1e-19	C	0.8595	0.1951	0.0411	2.018e-06
6:35474073_C_G	rs12215920	31648709	6	35474073	C	G	-	-	-	2.5e-09	1	0	0	C	0.7016	-0.1165	0.0197	3.106e-09	C	0.699245	-0.14636	0.0234857	2.6e-10	G	0.2946	0.068	0.0315	0.03112
6:36817113_A_G	rs236352	31648709	6	36817113	A	G	-	-	-	1.9e-31	1	1	1	A	0.3408	-0.2627	0.0188	3.56e-44	A	0.339317	-0.267362	0.0227595	4.4e-34	G	0.6568	0.2555	0.0297	8.394e-18
6:36914682_A_G	rs57623630	31648709	6	36914682	G	A	-	-	-	8.2e-09	1	0	0	A	0.0439	0.2272	0.0447	3.625e-07	G	0.957935	-0.275121	0.0539957	1.8e-07	G	0.9533	-0.1541	0.0703	0.02834
6:41658112_C_G	rs9471627	31648709	6	41658112	G	C	-	-	-	6.7e-14	1	1	1	C	0.4597	0.1754	0.018	1.557e-22	G	0.543185	-0.180453	0.0215426	1.2e-16	G	0.5358	-0.1673	0.0286	5.282e-09
6:41764080_A_G	rs6902650	31648709	6	41764080	G	A	-	-	-	3.3e-13	1	1	1	A	0.4894	-0.1442	0.018	1.14e-15	G	0.515215	0.162495	0.0214413	1.1e-14	G	0.5031	0.114	0.029	8.489e-05
6:45954511_A_ATCTC	rs765227758	31648709	6	45954511	ATCTC	A	-	-	-	1.1e-09	1	0	0	A	0.4326	0.1417	0.0227	4.534e-10	ATCTC	0.567794	-0.14479	0.0218763	2.4e-11	A	0.4414	0.0785	0.1035	0.4483
6:51838372_C_T	rs2435327	31648709	6	51838372	T	C	-	-	-	5.4e-10	1	1	1	T	0.393	-0.0912	0.0188	1.186e-06	T	0.39108	-0.127485	0.0219767	6.4e-09	C	0.6035	0.0254	0.0312	0.4159
6:53982630_A_G	rs28791933	31648709	6	53982630	G	A	-	-	-	7.8e-16	1	1	1	A	0.6346	0.17	0.0187	9.524e-20	G	0.363651	-0.207062	0.0224217	5.3e-21	G	0.3682	-0.1111	0.0298	0.000191
6:68524122_C_T	rs35405063	31648709	6	68524122	T	C	-	-	-	7.4e-09	0	1	0	T	0.7038	0.0899	0.0197	4.855e-06	T	0.700131	0.117334	0.0235505	5.5e-07	C	0.2903	-0.0459	0.0314	0.1435
6:7538279_C_G	rs72825054	31648709	6	7538279	G	C	-	-	-	2.8e-29	1	1	1	C	0.0937	0.3823	0.0316	1.171e-33	G	0.905439	-0.412913	0.0371816	2.2e-28	G	0.9079	-0.3283	0.0521	2.91e-10
6:76164729_G_T	rs9359123	31648709	6	76164729	G	T	-	-	-	6.4e-10	1	1	1	T	0.153	0.1434	0.0249	8.786e-09	G	0.852515	-0.173918	0.0303821	6.9e-09	G	0.839	-0.0987	0.0388	0.01104
7:100496887_A_G	rs12705096	31648709	7	100496887	A	G	-	-	-	1.1e-115	1	1	1	A	0.8202	-0.6145	0.0234	3.45e-152	A	0.821137	-0.655958	0.0279837	2.3e-122	G	0.1812	0.5477	0.0374	1.471e-48
7:101658570_C_T	rs7357138	31648709	7	101658570	T	C	-	-	-	6.3e-09	0	0	0	T	0.5467	0.1166	0.0182	1.365e-10	T	0.538699	0.116371	0.0217519	5e-08	C	0.4406	-0.1169	0.029	5.602e-05
7:107596372_A_G	rs150990106	31648709	7	107596372	G	A	-	-	-	4.2e-09	1	1	1	A	0.0175	0.415	0.0868	1.729e-06	G	0.986947	-0.590926	0.0958564	1.2e-09	G	0.9707	0.0455	0.1634	0.7805
7:116417848_C_G	rs11770163	31648709	7	116417848	G	C	-	-	-	4.8e-17	1	1	1	C	0.3332	0.1305	0.019	6.355e-12	G	0.668719	-0.161331	0.0229095	1e-12	G	0.6639	-0.0829	0.03	0.005709
7:123426991_A_G	rs615903	31648709	7	123426991	G	A	-	-	-	4.9e-17	1	1	1	A	0.305	-0.1747	0.0194	1.876e-19	G	0.693801	0.207338	0.0233086	3.2e-20	G	0.697	0.1237	0.0307	5.615e-05
7:126970005_A_G	rs3944151	31648709	7	126970005	A	G	-	-	-	8.4e-15	1	0	0	A	0.2687	0.1563	0.0205	2.623e-14	A	0.270565	0.167236	0.0242248	5.3e-12	G	0.7346	-0.1374	0.0336	4.304e-05
7:130992047_A_T	rs4731790	31648709	7	130992047	T	A	-	-	-	8.9e-28	1	1	1	A	0.5258	-0.2199	0.0179	1.366e-34	T	0.467756	0.251513	0.0215777	4e-31	T	0.4843	0.1705	0.0284	1.856e-09
7:135324658_G_T	rs10954500	31648709	7	135324658	G	T	-	-	-	1.5e-12	1	1	1	T	0.1682	-0.1533	0.0241	1.83e-10	G	0.832999	0.183791	0.0288693	8.6e-11	G	0.8298	0.1051	0.0383	0.006063
7:136573370_C_T	rs6969811	31648709	7	136573370	T	C	-	-	-	7.1e-41	1	1	1	T	0.8429	-0.386	0.0249	4.952e-54	T	0.847792	-0.384178	0.0301267	2.7e-38	C	0.1646	0.3887	0.0393	4.484e-23
7:150653336_C_T	rs882156	31648709	7	150653336	T	C	-	-	-	5.1e-09	1	1	1	T	0.3871	0.0681	0.0186	0.0002534	T	0.384882	0.088299	0.0222213	9.2e-05	C	0.6093	-0.0352	0.0299	0.2393
7:151388250_C_T	rs7797944	31648709	7	151388250	C	T	-	-	-	4.9e-08	1	0	0	T	0.1738	-0.1298	0.0238	4.999e-08	C	0.828808	0.15973	0.0286475	2.4e-08	C	0.822	0.083	0.0378	0.02788
7:155533924_C_G	rs73167163	31648709	7	155533924	C	G	-	-	-	1.1e-09	1	1	1	C	0.8461	-0.1855	0.0292	2.179e-10	C	0.843514	-0.181608	0.0301	4.4e-10	G	0.1409	0.2046	0.0706	0.003752
7:15906904_A_G	rs2530787	31648709	7	15906904	A	G	-	-	-	2.7e-12	1	1	1	A	0.643	0.1356	0.0189	7.051e-13	A	0.641943	0.137794	0.0225624	2.9e-10	G	0.3553	-0.132	0.0303	1.28e-05
7:26576783_C_T	rs757804	31648709	7	26576783	C	T	-	-	-	2.3e-16	1	1	1	T	0.1795	-0.2232	0.0234	1.502e-21	C	0.821863	0.233488	0.0282814	4.2e-17	C	0.8183	0.2075	0.0369	1.839e-08
7:35272923_C_T	rs4723398	31648709	7	35272923	C	T	-	-	-	1.3e-20	1	1	1	T	0.5457	-0.1754	0.018	2.045e-22	C	0.453705	0.207691	0.0216404	4.8e-22	C	0.4552	0.1245	0.0286	1.379e-05
7:40159424_C_G	rs6945703	31648709	7	40159424	G	C	-	-	-	4.4e-08	0	0	0	C	0.1244	0.1547	0.0272	1.229e-08	G	0.877314	-0.180875	0.0328044	3.8e-08	G	0.8729	-0.1145	0.0428	0.007508
7:40884657_A_T	rs55748232	31648709	7	40884657	A	T	-	-	-	2.4e-08	0	0	0	A	0.6423	-0.0894	0.0188	1.955e-06	A	0.640824	-0.116903	0.0225691	4.4e-08	T	0.3553	0.046	0.0299	0.1238
7:73042085_C_T	rs62466318	31648709	7	73042085	C	T	-	-	-	9e-09	1	1	1	T	0.1967	-0.1576	0.023	6.494e-12	C	0.801176	0.176865	0.0269948	1.5e-10	C	0.807	0.1237	0.0378	0.00106
7:73869857_C_G	rs73135307	31648709	7	73869857	C	G	-	-	-	4.7e-09	1	1	1	C	0.9306	0.2122	0.038	2.395e-08	C	0.930545	0.260172	0.0427923	8.4e-10	G	0.0693	-0.1017	0.0684	0.1371
7:75162394_G_T	rs62477738	31648709	7	75162394	G	T	-	-	-	5.2e-09	0	1	0	T	0.0214	0.3957	0.0799	7.29e-07	G	0.979925	-0.364049	0.0805796	5.4e-06	G	0.9698	-0.603	0.2175	0.005563
7:81573612_C_T	rs1229500	31648709	7	81573612	T	C	-	-	-	1.1e-08	1	0	0	T	0.7002	0.148	0.0198	7.336e-14	T	0.698725	0.141144	0.0236825	2.5e-09	C	0.2974	-0.1589	0.0316	5.002e-07
7:83841809_C_T	rs2189444	31648709	7	83841809	T	C	-	-	-	2.2e-09	1	1	1	T	0.3766	-0.1064	0.0186	1.152e-08	T	0.377511	-0.133156	0.0223266	6.6e-10	C	0.6248	0.0635	0.0298	0.03291
7:93547596_G_T	rs180248	31648709	7	93547596	T	G	-	-	-	1e-49	1	1	1	T	0.3564	0.343	0.019	6.437e-73	T	0.349125	0.348141	0.0225782	3e-54	G	0.6314	-0.3344	0.0307	1.271e-27
7:98984972_A_G	rs145815206	31648709	7	98984972	G	A	-	-	-	1.1e-13	1	0	0	A	0.0379	-0.3757	0.0537	2.552e-12	G	0.962437	0.422077	0.0586133	3.9e-12	G	0.9613	0.2434	0.1043	0.01961
7:99625199_A_G	rs12112642	31648709	7	99625199	G	A	-	-	-	3e-22	1	1	1	A	0.3032	-0.183	0.0195	7.745e-21	G	0.696308	0.200642	0.0234118	9.4e-18	G	0.6977	0.1547	0.0312	6.875e-07
8:106661577_G_T	rs10111794	31648709	8	106661577	T	G	-	-	-	5.5e-10	1	1	1	T	0.5634	-0.0948	0.0181	1.672e-07	T	0.564894	-0.113196	0.021722	1.5e-07	G	0.439	0.0655	0.0289	0.02335
8:13145524_A_T	rs118045325	31648709	8	13145524	A	T	-	-	-	2.3e-10	0	0	0	A	0.9534	-0.2819	0.0454	5.168e-10	A	0.954769	-0.331492	0.0522634	2.7e-10	T	0.0492	0.1833	0.0777	0.0183
8:143533052_A_G	rs9324592	31648709	8	143533052	G	A	-	-	-	1e-08	0	0	0	A	0.1562	-0.1079	0.0259	3.176e-05	G	0.846443	0.159958	0.0299561	1.8e-07	G	0.8387	0.0059	0.0442	0.8931
8:144981488_A_G	rs56233017	31648709	8	144981488	G	A	-	-	-	5e-27	1	1	1	A	0.0448	-0.5088	0.0469	2.112e-27	G	0.956341	0.548156	0.0536263	4.1e-25	G	0.9529	0.4266	0.0816	1.682e-07
8:15111734_G_T	rs6998920	31648709	8	15111734	G	T	-	-	-	4.3e-08	0	0	0	T	0.1327	0.1021	0.027	0.0001542	G	0.865203	-0.128511	0.0318112	2e-05	G	0.871	-0.0561	0.0443	0.2056
8:4804939_G_GT	rs34965012	31648709	8	4804939	G	GT	-	-	-	3.9e-09	1	1	1	G	0.5863	0.1365	0.0184	1.168e-13	G	0.581668	0.146019	0.0219909	5.1e-11	G	0.5939	0.1212	0.0295	3.961e-05
8:48867273_C_G	rs1231204	31648709	8	48867273	G	C	-	-	-	3.9e-10	1	1	1	C	0.9498	0.2538	0.042	1.553e-09	G	0.0474565	-0.306324	0.0505813	3e-10	G	0.0545	-0.1717	0.0666	0.009951
8:61526400_A_C	rs684573	31648709	8	61526400	A	C	-	-	-	9e-09	0	1	0	A	0.7543	0.0808	0.0209	0.0001147	A	0.752846	0.118437	0.0249229	3.5e-06	C	0.2432	-0.0184	0.0338	0.5869
9:112473443_T_TA	rs11448146	31648709	9	112473443	T	TA	-	-	-	2.9e-08	1	0	0	T	0.7386	-0.1158	0.021	3.612e-08	T	0.751119	-0.139211	0.0251147	1.4e-08	T	0.7184	-0.0778	0.0337	0.02086
9:123489818_A_G	rs10739573	31648709	9	123489818	A	G	-	-	-	9.3e-12	1	1	1	A	0.2463	-0.13	0.021	5.61e-10	A	0.243014	-0.148443	0.0251401	5.1e-10	G	0.7486	0.1006	0.0334	0.002578
9:128435256_A_G	rs638168	31648709	9	128435256	G	A	-	-	-	1.9e-42	1	1	1	A	0.5477	0.2377	0.0181	1.439e-39	G	0.450333	-0.284408	0.0216519	4.3e-39	G	0.4554	-0.1633	0.0288	1.387e-08
9:13663809_A_G	rs4008024	31648709	9	13663809	G	A	-	-	-	2.7e-11	1	1	1	A	0.5786	-0.1408	0.0232	1.207e-09	G	0.421559	0.137814	0.0218407	9.8e-10	G	0.406	0.5303	0.2648	0.0452
9:136522274_C_T	rs6271	31648709	9	136522274	C	T	-	-	-	5.5e-10	1	1	1	T	0.0698	-0.2218	0.0381	5.877e-09	C	0.929141	0.214569	0.0418694	2.4e-07	C	0.9332	0.2417	0.0729	0.000909
9:14680608_A_AT	rs778329763	31648709	9	14680608	AT	A	-	-	-	3.4e-08	1	0	0	A	0.3139	0.0718	0.0194	0.000214	AT	0.68564	-0.0940195	0.0233053	3.2e-05	A	0.3133	0.0368	0.0308	0.2318
9:14739875_C_G	rs10810231	31648709	9	14739875	G	C	-	-	-	4.3e-08	1	0	0	C	0.5699	0.0813	0.0181	7.257e-06	G	0.436969	-0.109984	0.0217286	8.7e-07	G	0.4192	-0.0356	0.0289	0.2184
9:35908488_A_G	rs10972619	31648709	9	35908488	A	G	-	-	-	3.3e-21	1	1	1	A	0.7873	0.1805	0.0226	1.455e-15	A	0.78579	0.228427	0.0266197	4e-18	G	0.21	-0.0962	0.0372	0.009809
9:37749508_A_G	rs12345385	31648709	9	37749508	A	G	-	-	-	1.2e-08	1	0	0	A	0.7264	-0.1288	0.0203	2.25e-10	A	0.727387	-0.12741	0.0242355	1.3e-07	G	0.2752	0.131	0.0326	5.728e-05
9:71753549_C_G	rs11145411	31648709	9	71753549	G	C	-	-	-	2.8e-10	1	1	1	C	0.2046	-0.146	0.0222	4.411e-11	G	0.794491	0.163527	0.0266259	5.9e-10	G	0.7968	0.1184	0.0352	0.0007678
9:81647969_C_CT	rs771839319	31648709	9	81647969	CT	C	-	-	-	4.2e-12	1	1	1	CT	0.3185	0.1589	0.0194	2.864e-16	CT	0.317474	0.151981	0.0234295	2.1e-10	C	0.6799	-0.1696	0.0307	3.439e-08
9:83196050_A_G	rs10120800	31648709	9	83196050	G	A	-	-	-	1.1e-09	1	1	1	A	0.2824	0.1224	0.0199	8.113e-10	G	0.72298	-0.142236	0.0240344	4.3e-10	G	0.7093	-0.0918	0.0315	0.00356
9:9355243_A_C	rs2780076	31648709	9	9355243	C	A	-	-	-	2.5e-08	1	0	0	A	0.6363	-0.1116	0.0186	2.128e-09	C	0.359769	0.12313	0.0224945	1.8e-08	C	0.3697	0.0938	0.0294	0.00142
9:96914890_A_G	rs112594996	31648709	9	96914890	G	A	-	-	-	1.9e-09	0	1	0	A	0.0439	-0.2031	0.0445	5.1e-06	G	0.95536	0.243387	0.0519712	1.9e-06	G	0.9574	0.1288	0.0744	0.08344
9:99165257_C_CT	rs375468277	31648709	9	99165257	C	CT	-	-	-	1.6e-10	1	1	1	CT	0.1734	-0.1774	0.0304	5.208e-09	C	0.826579	0.172921	0.0286456	1.2e-10	C	0.8334	0.7609	0.3464	0.02806
10:101522170_A_G	rs10786570	31648709	10	101522170	G	A	-	-	-	3.8e-11	1	1	1	A	0.5738	-0.1232	0.0181	1.033e-11	G	0.430009	0.161528	0.0217555	2.2e-13	G	0.4202	0.0627	0.0288	0.02934
10:102085102_A_G	rs55825790	31648709	10	102085102	G	A	-	-	-	1.8e-09	1	0	0	A	0.0598	0.2438	0.0407	2.08e-09	G	0.940912	-0.234939	0.0463648	3e-07	G	0.9388	-0.2628	0.0713	0.0002264
10:102248884_C_T	rs3750720	31648709	10	102248884	C	T	-	-	-	1.2e-12	1	0	0	T	0.2214	-0.1617	0.0218	1.192e-13	C	0.779257	0.158395	0.0259384	1.2e-09	C	0.7776	0.1672	0.0352	1.991e-06
10:102552663_A_G	rs11190709	31648709	10	102552663	G	A	-	-	-	2.9e-20	1	1	1	A	0.8915	0.2788	0.029	7.425e-22	G	0.107998	-0.302828	0.0347772	1.4e-19	G	0.1092	-0.2404	0.0463	2.074e-07
10:103831598_A_G	rs11191205	31648709	10	103831598	G	A	-	-	-	4.2e-08	0	0	0	A	0.1751	-0.1332	0.024	2.971e-08	G	0.825371	0.145659	0.0285612	1.7e-07	G	0.8242	0.1125	0.0389	0.003868
10:104658992_A_G	rs7909286	31648709	10	104658992	A	G	-	-	-	9.6e-12	1	0	0	A	0.7028	0.1249	0.0195	1.455e-10	A	0.706337	0.1667	0.0235802	6.8e-13	G	0.3026	-0.0614	0.0306	0.04493
10:105617908_A_C	rs56093138	31648709	10	105617908	A	C	-	-	-	9.7e-12	1	1	1	A	0.6952	0.1538	0.0197	5.107e-15	A	0.69147	0.151982	0.0234052	1.5e-10	C	0.2986	-0.1568	0.0317	7.375e-07
10:112459906_A_G	rs10787270	31648709	10	112459906	G	A	-	-	-	1.7e-15	1	1	1	A	0.5547	0.1784	0.0182	1.41e-22	G	0.440433	-0.163863	0.021967	2.1e-14	G	0.4528	-0.201	0.0289	3.364e-12
10:114750236_C_T	rs61875118	31648709	10	114750236	T	C	-	-	-	5.3e-10	1	0	0	T	0.7718	-0.1272	0.0216	4.098e-09	T	0.774219	-0.154759	0.0258816	1.8e-09	C	0.2322	0.0828	0.0346	0.01664
10:11540763_C_G	rs12766676	31648709	10	11540763	G	C	-	-	-	1.9e-10	0	1	0	C	0.2206	-0.0962	0.0216	8.067e-06	G	0.778279	0.149537	0.0258833	4.3e-09	G	0.7811	0.0119	0.0343	0.7288
10:115474568_A_T	rs114200620	31648709	10	115474568	T	A	-	-	-	2e-13	1	0	0	A	0.1053	-0.2045	0.0296	4.558e-12	T	0.892606	0.253782	0.0350046	4.1e-13	T	0.8982	0.1207	0.0481	0.01208
10:115809171_A_G	rs17875479	31648709	10	115809171	G	A	-	-	-	2.9e-08	1	0	0	A	0.0346	0.2588	0.0509	3.715e-07	G	0.964938	-0.298337	0.0588709	1.2e-07	G	0.9662	-0.1818	0.0865	0.03551
10:121438212_C_T	rs72842212	31648709	10	121438212	C	T	-	-	-	3.5e-09	1	1	1	T	0.1286	-0.1481	0.0276	7.654e-08	C	0.873916	0.189992	0.0326421	1.2e-09	C	0.8671	0.077	0.0448	0.08541
10:18643581_A_G	rs2357929	31648709	10	18643581	G	A	-	-	-	2.1e-13	1	1	1	A	0.1281	-0.247	0.0274	1.96e-19	G	0.871948	0.228109	0.0323627	2.5e-13	G	0.8719	0.2797	0.0448	4.313e-10
10:29238761_A_T	rs4749369	31648709	10	29238761	A	T	-	-	-	3.6e-13	1	1	1	A	0.2209	0.163	0.022	1.243e-13	A	0.219733	0.176639	0.0262586	6.1e-12	T	0.7772	-0.1408	0.0353	6.83e-05
10:29546557_A_G	rs2532770	31648709	10	29546557	A	G	-	-	-	5.7e-11	1	0	0	A	0.8347	0.1464	0.0249	3.851e-09	A	0.833349	0.174304	0.0292487	1.6e-09	G	0.1629	-0.0973	0.0409	0.01733
10:29820758_C_T	rs17695155	31648709	10	29820758	T	C	-	-	-	3.1e-25	1	1	1	T	0.6055	-0.2214	0.0185	5.051e-33	T	0.603774	-0.236001	0.0220786	3.9e-28	C	0.3918	0.1976	0.0297	2.673e-11
10:43429339_C_T	rs61843431	31648709	10	43429339	T	C	-	-	-	1.7e-13	1	1	1	T	0.9054	-0.1916	0.0305	3.234e-10	T	0.904428	-0.243389	0.0365036	1.2e-11	C	0.0931	0.1087	0.0487	0.02567
10:50507454_C_T	rs7897237	31648709	10	50507454	C	T	-	-	-	3.5e-13	1	1	1	T	0.5859	0.1336	0.0185	5.762e-13	C	0.409115	-0.131337	0.0220434	2e-10	C	0.4224	-0.1375	0.03	4.603e-06
10:63174865_A_C	rs11593659	31648709	10	63174865	C	A	-	-	-	1.6e-17	1	1	1	A	0.2165	0.2018	0.0218	1.783e-20	C	0.7889	-0.241629	0.0263772	7.3e-20	C	0.7753	-0.1418	0.0341	3.199e-05
10:70363393_C_T	rs1954278	31648709	10	70363393	C	T	-	-	-	8.5e-11	1	1	1	T	0.614	0.1317	0.0186	1.343e-12	C	0.389181	-0.15046	0.0220605	1.1e-12	C	0.3807	-0.1003	0.0301	0.0008645
10:75647491_A_C	rs11000801	31648709	10	75647491	A	C	-	-	-	7.8e-10	1	1	1	A	0.8139	0.1456	0.0233	3.922e-10	A	0.817048	0.14139	0.0280136	2.8e-07	C	0.191	-0.1523	0.0369	3.718e-05
10:92715548_C_T	rs12777649	31648709	10	92715548	T	C	-	-	-	3.5e-11	1	1	1	T	0.4505	0.1312	0.0227	7.039e-09	T	0.447848	0.135144	0.0218112	4.1e-10	C	0.4962	-0.051	0.1032	0.6212
11:111750829_C_T	rs10789850	31648709	11	111750829	C	T	-	-	-	1.2e-08	1	0	0	T	0.2857	-0.1503	0.0198	2.792e-14	C	0.71389	0.141586	0.0237452	2.7e-09	C	0.7149	0.1641	0.0314	1.776e-07
11:112648312_C_T	rs72995793	31648709	11	112648312	C	T	-	-	-	2.9e-10	1	1	1	T	0.1923	-0.1495	0.0235	2.122e-10	C	0.805295	0.154031	0.0272447	7.6e-09	C	0.8124	0.1407	0.0399	0.0004216
11:12223034_C_T	rs74964634	31648709	11	12223034	C	T	-	-	-	8.8e-13	1	1	1	T	0.0741	0.2313	0.0359	1.182e-10	C	0.93226	-0.282955	0.0437721	1.2e-11	C	0.9167	-0.1556	0.0558	0.005279
11:123008349_C_G	rs12283343	31648709	11	123008349	G	C	-	-	-	2.9e-11	1	1	1	C	0.2384	-0.1126	0.021	8.321e-08	G	0.761257	0.163727	0.0252466	4e-11	G	0.7622	0.0321	0.0334	0.3354
11:128764922_A_G	rs11221500	31648709	11	128764922	G	A	-	-	-	1.2e-31	1	1	1	A	0.3785	-0.2615	0.0194	1.563e-41	G	0.620956	0.266283	0.0223049	5.7e-34	G	0.6226	0.252	0.0332	3.441e-14
11:13291823_A_ATATATT	rs148728593	31648709	11	13291823	A	ATATATT	-	-	-	2.3e-10	1	1	1	A	0.2998	-0.0993	0.0244	4.738e-05	A	0.300723	-0.100961	0.0234622	4.5e-06	A	0.2805	-0.0631	0.1141	0.5801
11:14082534_A_G	rs882667	31648709	11	14082534	G	A	-	-	-	7.1e-17	1	1	1	A	0.5289	0.154	0.018	1.117e-17	G	0.470985	-0.176775	0.0216101	2.7e-16	G	0.4714	-0.1181	0.0286	3.57e-05
11:2203154_C_T	rs11043003	31648709	11	2203154	T	C	-	-	-	3.1e-10	1	1	1	T	0.758	-0.1278	0.0216	3.508e-09	T	0.761533	-0.132793	0.025498	4e-07	C	0.2483	0.119	0.0355	0.0008061
11:31051686_A_AT	rs35693769	31648709	11	31051686	A	AT	-	-	-	9.8e-09	1	1	1	A	0.5812	-0.1176	0.0229	2.768e-07	A	0.581556	-0.129127	0.0220467	1.1e-09	A	0.5747	0.112	0.1039	0.281
11:32360235_G_T	rs12788774	31648709	11	32360235	G	T	-	-	-	1.6e-10	1	1	1	T	0.2339	-0.1625	0.0217	7.654e-14	G	0.761798	0.18314	0.0255213	1.9e-13	G	0.7737	0.1257	0.0359	0.0004682
11:43610813_C_T	rs2679055	31648709	11	43610813	T	C	-	-	-	1.3e-11	1	1	1	T	0.547	0.0971	0.018	6.606e-08	T	0.542892	0.124462	0.0215811	3.2e-09	C	0.4466	-0.0538	0.0286	0.06022
11:44975552_C_T	rs34206025	31648709	11	44975552	C	T	-	-	-	2.5e-27	1	1	1	T	0.3322	0.2079	0.0193	4.588e-27	C	0.671664	-0.23706	0.0230248	1e-25	C	0.6615	-0.1602	0.031	2.459e-07
11:57510823_G_T	rs11229113	31648709	11	57510823	G	T	-	-	-	4.6e-09	0	1	0	T	0.3138	0.1037	0.0193	7.62e-08	G	0.684648	-0.127154	0.0231979	2e-08	G	0.6887	-0.0669	0.0306	0.02871
11:61592362_A_G	rs174566	31648709	11	61592362	A	G	-	-	-	1.2e-51	1	1	1	A	0.6556	-0.3416	0.0189	1.129e-72	A	0.654362	-0.332699	0.0226698	1.1e-50	G	0.3423	0.3558	0.0303	9.405e-32
11:62383715_C_G	rs12794886	31648709	11	62383715	G	C	-	-	-	1.9e-12	1	0	0	C	0.6983	0.1374	0.0203	1.348e-11	G	0.294446	-0.151464	0.0237691	5.9e-10	G	0.3149	-0.1119	0.0338	0.0009399
11:64009879_A_G	rs4672	31648709	11	64009879	G	A	-	-	-	1.4e-08	0	0	0	A	0.0798	-0.1755	0.0341	2.723e-07	G	0.919924	0.175089	0.0398045	2.2e-05	G	0.9208	0.1763	0.0571	0.002014
11:65337251_A_T	rs1346	31648709	11	65337251	A	T	-	-	-	3.6e-13	1	1	1	A	0.8078	0.1856	0.0229	6.141e-16	A	0.803824	0.222556	0.0271086	4.9e-18	T	0.1854	-0.1218	0.0375	0.001158
11:78030046_C_T	rs7116611	31648709	11	78030046	T	C	-	-	-	5.4e-11	1	1	1	T	0.8357	-0.1559	0.0246	2.188e-10	T	0.84112	-0.203193	0.0294661	1.1e-11	C	0.173	0.0808	0.0391	0.0387
11:89224477_A_G	rs2289124	31648709	11	89224477	G	A	-	-	-	1.1e-08	1	0	0	A	0.177	0.124	0.0243	3.145e-07	G	0.830753	-0.168505	0.0290146	1.4e-08	G	0.8106	-0.0524	0.0388	0.1762
11:10331311_A_G	rs7944706	31648709	11	10331311	G	A	-	-	-	4.6e-08	1	0	0	A	0.4277	-0.0883	0.0186	2.081e-06	G	0.570425	0.105728	0.0218098	2.1e-06	G	0.5758	0.0569	0.0308	0.0649
12:107091223_C_CTT	rs574478204	31648709	12	107091223	C	CTT	-	-	-	3.9e-11	1	1	1	CTT	0.351	-0.1505	0.0241	4.077e-10	C	0.648959	0.147445	0.0227117	4.2e-11	C	0.6589	0.5532	0.2747	0.04402
12:110743984_C_G	rs7965279	31648709	12	110743984	G	C	-	-	-	2.5e-18	1	1	1	C	0.6963	-0.1655	0.0199	9.682e-17	G	0.29566	0.202091	0.0238597	3.8e-17	G	0.3165	0.1069	0.0318	0.0007712
12:114867127_A_T	rs1265508	31648709	12	114867127	A	T	-	-	-	3.3e-09	1	1	1	A	0.5596	-0.1447	0.018	1.105e-15	A	0.55349	-0.155141	0.0216788	8e-13	T	0.4307	0.1281	0.0287	8.169e-06
12:116242746_A_G	rs708817	31648709	12	116242746	A	G	-	-	-	1.4e-12	1	1	1	A	0.0905	0.2151	0.0314	7.818e-12	A	0.0914762	0.259417	0.0374828	3e-12	G	0.9111	-0.1424	0.0506	0.004893
12:123079020_G_T	rs10847242	31648709	12	123079020	T	G	-	-	-	7.7e-10	1	1	1	T	0.3683	-0.1119	0.0185	1.369e-09	T	0.365564	-0.132526	0.0223127	1.8e-09	G	0.6274	0.0803	0.0291	0.005831
12:20000865_A_G	rs79863363	31648709	12	20000865	G	A	-	-	-	3.8e-13	1	1	1	A	0.011	0.6698	0.0979	7.953e-12	G	0.988531	-0.683694	0.100657	2.5e-11	G	0.9913	-0.5988	0.2394	0.01239
12:20473019_A_G	rs11045173	31648709	12	20473019	A	G	-	-	-	1.9e-28	1	1	1	A	0.7871	0.2418	0.0219	2.401e-28	A	0.783566	0.28093	0.0261348	3.4e-27	G	0.207	-0.178	0.0352	4.142e-07
12:2178165_A_G	rs11062103	31648709	12	2178165	A	G	-	-	-	1.1e-71	1	1	1	A	0.8224	0.4406	0.0236	6.651e-78	A	0.82418	0.50677	0.0283187	9.2e-72	G	0.1804	-0.336	0.0375	3.369e-19
12:24758480_A_G	rs4963772	31648709	12	24758480	G	A	-	-	-	1.3e-111	1	1	1	A	0.1512	-0.6621	0.0251	5.47e-153	G	0.848983	0.710846	0.0300261	3.3e-127	G	0.8486	0.5831	0.0403	1.996e-47
12:24986564_C_T	rs17372766	31648709	12	24986564	C	T	-	-	-	4.6e-09	1	0	0	T	0.2564	0.115	0.0204	1.71e-08	C	0.746931	-0.130323	0.0246902	7.2e-08	C	0.7386	-0.0917	0.032	0.00411
12:26348304_C_T	rs58747679	31648709	12	26348304	T	C	-	-	-	3.2e-18	1	1	1	T	0.7061	-0.2103	0.0196	9.757e-27	T	0.706343	-0.220316	0.0236654	1.1e-20	C	0.2944	0.1947	0.0311	3.678e-10
12:27955296_C_T	rs1050288	31648709	12	27955296	C	T	-	-	-	1.1e-24	1	0	0	T	0.3427	-0.2174	0.0196	1.127e-28	C	0.658005	0.241339	0.0228648	1.3e-26	C	0.6559	0.1735	0.0326	1.029e-07
12:33537387_C_T	rs1343676	31648709	12	33537387	T	C	-	-	-	3.2e-88	1	1	1	T	0.5001	0.4108	0.0181	1.52e-114	T	0.502119	0.425607	0.0215565	5.3e-89	C	0.5033	-0.3866	0.029	1.346e-40
12:38370110_C_G	rs10880321	31648709	12	38370110	C	G	-	-	-	3.5e-37	1	0	0	C	0.3742	0.2686	0.019	1.36e-45	C	0.378505	0.294289	0.0222621	5.2e-41	G	0.6334	-0.223	0.0313	1.006e-12
12:39439134_A_G	rs73085481	31648709	12	39439134	A	G	-	-	-	7.1e-11	1	1	1	A	0.9655	-0.3684	0.0518	1.092e-12	A	0.966438	-0.395126	0.0610851	3e-11	G	0.0362	0.3221	0.0847	0.0001437
12:49601164_C_T	rs142603747	31648709	12	49601164	C	T	-	-	-	4e-08	1	0	0	T	0.0626	0.2531	0.0434	5.43e-09	C	0.937107	-0.251337	0.0451624	7.5e-08	C	0.9385	-0.2608	0.0999	0.009012
12:53626031_C_G	rs564134026	31648709	12	53626031	C	G	-	-	-	1.5e-08	0	0	0	C	0.9744	-0.368	0.0719	3.059e-07	C	0.974247	-0.344232	0.0685962	3.2e-07	G	0.0194	1.1273	0.4086	0.005795
12:57171516_C_T	rs10459247	31648709	12	57171516	T	C	-	-	-	2.9e-08	1	0	0	T	0.7546	-0.1393	0.021	3.144e-11	T	0.753627	-0.132381	0.0252842	6.1e-08	C	0.244	0.1501	0.0332	6.097e-06
12:64975917_G_T	rs1245034	31648709	12	64975917	T	G	-	-	-	3.4e-33	1	1	1	T	0.4379	-0.2477	0.0181	1.387e-42	T	0.433285	-0.275033	0.021754	2e-36	G	0.5548	0.2046	0.0288	1.15e-12
12:6607018_C_G	rs7310211	31648709	12	6607018	G	C	-	-	-	1.2e-09	0	1	0	C	0.5309	0.0708	0.0179	7.564e-05	G	0.46942	-0.107658	0.0215768	8e-08	G	0.4686	-0.0138	0.0283	0.6264
12:66376202_C_G	rs7136054	31648709	12	66376202	G	C	-	-	-	1.4e-13	1	1	1	C	0.5219	0.154	0.0183	4.357e-17	G	0.473593	-0.144318	0.0217954	2.2e-11	G	0.4855	-0.17	0.0296	8.942e-09
12:82203236_A_ACTTTACTTTTAGAATGT	rs748637448	31648709	12	82203236	ACTTTACTTTTAGAATGT	A	-	-	-	3.2e-20	1	1	1	A	0.215	-0.2094	0.0222	3.306e-21	ACTTTACTTTTAGAATGT	0.779777	0.236961	0.0261357	5.2e-19	A	0.206	-0.1616	0.0363	8.453e-06
12:93709539_A_G	rs1135400	31648709	12	93709539	A	G	-	-	-	3.7e-08	1	0	0	A	0.5996	-0.109	0.0184	3.236e-09	A	0.600874	-0.0863379	0.0219609	4.1e-05	G	0.4026	0.146	0.0296	8.369e-07
13:28191895_C_T	rs498432	31648709	13	28191895	T	C	-	-	-	3.3e-10	1	1	1	T	0.5501	0.1558	0.0182	1.097e-17	T	0.550902	0.147598	0.0216831	3.4e-11	C	0.4513	-0.1693	0.0293	7.907e-09
13:41160270_C_T	rs9532563	31648709	13	41160270	T	C	-	-	-	3.1e-09	1	1	1	T	0.7838	-0.1206	0.0217	2.604e-08	T	0.782907	-0.150561	0.0260896	6.1e-09	C	0.2147	0.0739	0.0343	0.03104
13:69019321_A_T	rs9564463	31648709	13	69019321	A	T	-	-	-	8.2e-12	1	1	1	A	0.5285	0.1143	0.0181	2.433e-10	A	0.526227	0.153363	0.0216955	1.8e-13	T	0.4679	-0.0528	0.0287	0.06581
13:73730671_C_T	rs7982559	31648709	13	73730671	C	T	-	-	-	6.5e-10	1	1	1	T	0.4747	-0.104	0.0183	1.254e-08	C	0.530137	0.13822	0.0216577	1.8e-10	C	0.5172	0.0461	0.0297	0.1207
13:98866535_G_T	rs77552717	31648709	13	98866535	G	T	-	-	-	1.5e-10	1	1	1	T	0.0895	-0.1975	0.0324	1.041e-09	G	0.909894	0.205005	0.0378879	8.1e-08	G	0.9116	0.1838	0.0537	0.0006236
14:102659988_C_T	rs56386186	31648709	14	102659988	T	C	-	-	-	1.6e-10	1	1	1	T	0.9124	-0.1901	0.0319	2.443e-09	T	0.915359	-0.204833	0.0386171	2e-07	C	0.092	0.1679	0.05	0.0007915
14:21542766_A_G	rs12889267	31648709	14	21542766	A	G	-	-	-	3.2e-67	1	1	1	A	0.8369	-0.4584	0.025	3.972e-75	A	0.836397	-0.497384	0.0290407	9.7e-68	G	0.1621	0.3847	0.0421	6.6e-20
14:23343964_C_T	rs113324584	31648709	14	23343964	C	T	-	-	-	4e-10	1	1	1	T	0.073	0.1671	0.0379	1.056e-05	C	0.927363	-0.231274	0.0423574	9.8e-08	C	0.9262	-0.0112	0.0696	0.8719
14:23688622_G_T	rs116921841	31648709	14	23688622	G	T	-	-	-	3.9e-16	1	1	1	T	0.0226	0.4481	0.0666	1.712e-11	G	0.976775	-0.480692	0.0730898	2.3e-11	G	0.9793	-0.3586	0.1277	0.004969
14:23823913_A_T	rs7148564	31648709	14	23823913	T	A	-	-	-	2.8e-45	1	0	0	A	0.1694	0.3481	0.0244	2.613e-46	T	0.833389	-0.377794	0.0289568	1.5e-40	T	0.826	-0.2985	0.0394	3.627e-14
14:23861811_A_G	rs365990	31648709	14	23861811	A	G	-	-	-	1e-274	1	1	1	A	0.624	-0.7247	0.0189	5.33e-322	A	0.626453	-0.780816	0.0222626	9e-273	G	0.3803	0.6267	0.031	7.81e-91
14:24899194_C_T	rs10146759	31648709	14	24899194	C	T	-	-	-	3.5e-15	1	0	0	T	0.8636	0.2181	0.0265	2.055e-16	C	0.137721	-0.224195	0.0312169	7.5e-13	C	0.1341	-0.2074	0.0437	2.125e-06
14:31832124_C_T	rs11627106	31648709	14	31832124	C	T	-	-	-	3.7e-11	1	1	1	T	0.4114	-0.1415	0.0183	9.018e-15	C	0.584739	0.146331	0.0218955	1.3e-11	C	0.5947	0.1339	0.0291	4.174e-06
14:52511596_C_G	rs67640320	31648709	14	52511596	C	G	-	-	-	4.6e-10	1	1	1	C	0.771	-0.1532	0.0213	6.39e-13	C	0.777482	-0.16949	0.025863	1.4e-11	G	0.2387	0.1288	0.0333	0.0001104
14:55485150_G_T	rs67395322	31648709	14	55485150	G	T	-	-	-	1.3e-08	1	0	0	T	0.3284	-0.1169	0.0193	1.544e-09	G	0.668398	0.130053	0.0231285	2e-08	G	0.6767	0.0955	0.031	0.002041
14:55947408_A_T	rs201874844	31648709	14	55947408	T	A	-	-	-	3.5e-08	1	0	0	A	0.462	-0.1023	0.0227	6.587e-06	T	0.532483	0.106798	0.0217881	2e-06	T	0.6657	-0.0021	0.1107	0.985
14:64271996_G_T	rs11158509	31648709	14	64271996	T	G	-	-	-	2.5e-08	1	0	0	T	0.4078	0.1006	0.0182	3.481e-08	T	0.408364	0.124833	0.0218947	9.2e-09	G	0.5932	-0.0622	0.029	0.03166
14:69456782_G_GA	rs5809410	31648709	14	69456782	G	GA	-	-	-	7.6e-09	0	1	0	G	0.5736	-0.0962	0.0229	2.619e-05	G	0.574394	-0.0988884	0.0220324	4.6e-06	G	0.558	-0.0423	0.1035	0.6829
14:72188753_A_G	rs11158912	31648709	14	72188753	A	G	-	-	-	7.1e-09	1	1	1	A	0.8114	0.1134	0.0231	8.75e-07	A	0.815944	0.154674	0.0279227	1.4e-08	G	0.1956	-0.0509	0.0362	0.1596
14:72885471_C_G	rs17180489	31648709	14	72885471	G	C	-	-	-	2.3e-74	1	1	1	C	0.1406	-0.5338	0.0294	1.475e-73	G	0.858185	0.581302	0.0308261	3.2e-80	G	0.8646	0.3382	0.0659	2.87e-07
14:78378375_A_C	rs2364748	31648709	14	78378375	A	C	-	-	-	5.4e-12	1	1	1	A	0.5328	-0.1399	0.0183	2.226e-14	A	0.537073	-0.172657	0.0216468	1.9e-15	C	0.4746	0.0835	0.0299	0.005227
14:85796564_A_G	rs17201923	31648709	14	85796564	A	G	-	-	-	1.4e-65	1	1	1	A	0.7207	0.4246	0.0201	1.65e-99	A	0.722374	0.449021	0.0241277	5.6e-80	G	0.2819	-0.3864	0.0318	5.615e-34
14:89854312_A_C	rs11159906	31648709	14	89854312	C	A	-	-	-	3.5e-08	0	0	0	A	0.7083	-0.1343	0.02	1.849e-11	C	0.291058	0.125834	0.0237714	3.1e-07	C	0.2928	0.1483	0.0323	4.391e-06
14:91584821_A_AC	rs769062995	31648709	14	91584821	AC	A	-	-	-	1e-19	1	1	1	A	0.786	0.2124	0.0221	6.766e-22	AC	0.216519	-0.222858	0.0262138	6.8e-18	A	0.7901	0.1948	0.0358	5.339e-08
14:94363887_C_T	rs72698224	31648709	14	94363887	T	C	-	-	-	2.3e-08	1	0	0	T	0.9193	-0.2081	0.0338	7.465e-10	T	0.9221	-0.211822	0.0408611	1.9e-07	C	0.085	0.2023	0.0532	0.000142
15:51489599_A_C	rs16964172	31648709	15	51489599	A	C	-	-	-	2.5e-08	0	0	0	A	0.8097	0.1	0.0229	1.306e-05	A	0.809627	0.150074	0.0275604	1.4e-08	C	0.1902	-0.021	0.0365	0.5641
15:63359564_A_C	rs4619348	31648709	15	63359564	A	C	-	-	-	2e-10	1	1	1	A	0.4386	-0.1323	0.0183	4.526e-13	A	0.437198	-0.142471	0.0217089	1e-11	C	0.5591	0.1153	0.0296	9.804e-05
15:63818732_A_G	rs77912104	31648709	15	63818732	A	G	-	-	-	3.2e-11	1	1	1	A	0.839	-0.1538	0.0246	4.298e-10	A	0.845348	-0.207834	0.0297848	3.5e-12	G	0.1706	0.0713	0.0388	0.06596
15:73109078_C_T	rs12914505	31648709	15	73109078	C	T	-	-	-	3.3e-30	1	0	0	T	0.7384	0.2304	0.0205	2.227e-29	C	0.258973	-0.252609	0.0247198	9.4e-25	C	0.2656	-0.1963	0.0323	1.151e-09
15:73663632_A_G	rs7172808	31648709	15	73663632	A	G	-	-	-	2e-79	1	1	1	A	0.8382	0.4758	0.0243	4.52e-85	A	0.841275	0.512698	0.0294454	2.3e-69	G	0.1666	-0.4197	0.0383	6.688e-28
15:74134883_C_T	rs11636381	31648709	15	74134883	T	C	-	-	-	2.4e-08	1	0	0	T	0.8668	-0.1142	0.0266	1.82e-05	T	0.869966	-0.145018	0.0322649	5.9e-06	C	0.1381	0.0675	0.0418	0.1061
15:74328116_A_G	rs743580	31648709	15	74328116	A	G	-	-	-	2.4e-10	1	1	1	A	0.5031	-0.0783	0.018	1.396e-05	A	0.507939	-0.106419	0.0215009	3.3e-06	G	0.5048	0.0323	0.029	0.2655
15:83768944_A_T	rs28711295	31648709	15	83768944	A	T	-	-	-	2.7e-14	1	1	1	A	0.574	0.1234	0.0183	1.474e-11	A	0.573989	0.141244	0.021994	2.8e-11	T	0.4259	-0.0955	0.029	0.0009976
15:95322411_A_T	rs8039898	31648709	15	95322411	T	A	-	-	-	5.6e-18	1	1	1	A	0.1385	0.1962	0.026	4.433e-14	T	0.862092	-0.260621	0.0311923	2e-16	T	0.8605	-0.094	0.0414	0.02325
15:99714970_T_TA	rs35205370	31648709	15	99714970	T	TA	-	-	-	9.4e-10	1	1	1	T	0.7358	-0.1458	0.0205	1.042e-12	T	0.739347	-0.1495	0.0246857	5.3e-10	T	0.7304	-0.14	0.0323	1.447e-05
16:10756969_A_C	rs2466120	31648709	16	10756969	C	A	-	-	-	4.2e-16	1	1	1	A	0.371	0.1571	0.0185	2.163e-17	C	0.62872	-0.178475	0.0223678	7.9e-16	C	0.6295	-0.1244	0.0292	2.111e-05
16:15125441_G_T	rs4985124	31648709	16	15125441	T	G	-	-	-	2.7e-09	1	0	0	T	0.702	-0.1148	0.0199	8.209e-09	T	0.70223	-0.149546	0.0234775	2.2e-10	G	0.2983	0.0542	0.0327	0.09735
16:15910743_A_G	rs3915499	31648709	16	15910743	G	A	-	-	-	1.6e-44	1	1	1	A	0.3236	0.3464	0.0195	9.086e-71	G	0.679487	-0.361827	0.0231505	7.8e-55	G	0.6713	-0.3207	0.0315	2.58e-24
16:20020013_G_T	rs2521483	31648709	16	20020013	T	G	-	-	-	1.1e-14	1	1	1	T	0.7301	0.1808	0.0203	4.883e-19	T	0.737254	0.218446	0.0244271	5.7e-20	G	0.2811	-0.1222	0.0321	0.0001384
16:22098662_C_T	rs72784941	31648709	16	22098662	T	C	-	-	-	1.3e-08	1	0	0	T	0.9291	-0.2321	0.0395	4.338e-09	T	0.932472	-0.240474	0.0434122	1.6e-08	C	0.0802	0.2092	0.0757	0.005726
16:4269558_C_G	rs8046884	31648709	16	4269558	C	G	-	-	-	2.1e-14	1	1	1	C	0.4931	0.1776	0.0181	1.208e-22	C	0.495832	0.16452	0.0216554	1.9e-14	G	0.5114	-0.1988	0.0291	8.739e-12
16:51187142_A_G	rs33982895	31648709	16	51187142	G	A	-	-	-	4.2e-09	1	1	1	A	0.2134	0.1308	0.0222	4.092e-09	G	0.794662	-0.172599	0.026715	6e-11	G	0.7738	-0.0648	0.0354	0.06694
16:682566_C_T	rs2269561	31648709	16	682566	T	C	-	-	-	1e-08	1	0	0	T	0.7707	0.1505	0.022	7.228e-12	T	0.779151	0.160215	0.0261181	2.8e-10	C	0.2434	-0.1344	0.0355	0.0001537
16:65283595_A_AAAGT	rs781388561	31648709	16	65283595	AAAGT	A	-	-	-	4.6e-49	1	1	1	A	0.5652	-0.308	0.0181	8.543e-65	AAAGT	0.433249	0.327237	0.0217219	7.1e-52	A	0.5626	-0.2773	0.0289	8.673e-22
16:65309525_C_G	rs62045064	31648709	16	65309525	C	G	-	-	-	4.7e-11	1	0	0	C	0.5133	0.1066	0.0182	4.362e-09	C	0.498948	0.120177	0.0216646	8.5e-09	G	0.4631	-0.0844	0.0292	0.003769
16:66914492_C_T	rs45474499	31648709	16	66914492	C	T	-	-	-	1.7e-16	1	1	1	T	0.0468	0.4154	0.0431	5.951e-22	C	0.955506	-0.393473	0.0521973	1.6e-14	C	0.9496	-0.4487	0.0678	3.616e-11
16:69549749_A_C	rs11866219	31648709	16	69549749	A	C	-	-	-	3.2e-15	1	1	1	A	0.4218	0.1245	0.0185	1.578e-11	A	0.42377	0.13204	0.0220877	6e-09	C	0.5815	-0.1124	0.0296	0.000144
16:7414356_C_T	rs17648229	31648709	16	7414356	C	T	-	-	-	6.4e-09	1	1	1	T	0.524	-0.1001	0.0183	4.424e-08	C	0.472737	0.1016	0.0217194	4.1e-06	C	0.4814	0.0975	0.0296	0.0009832
17:12175814_A_G	rs9899959	31648709	17	12175814	A	G	-	-	-	1.8e-08	0	0	0	A	0.2825	-0.1248	0.0203	8.298e-10	A	0.276677	-0.140597	0.0242508	1.5e-08	G	0.7079	0.099	0.0327	0.002469
17:15134006_C_T	rs1804193	31648709	17	15134006	C	T	-	-	-	4.1e-40	1	1	1	T	0.0753	0.509	0.0357	5.065e-46	C	0.928536	-0.561435	0.0416649	4.4e-43	C	0.9177	-0.4116	0.0598	5.858e-12
17:15447777_C_T	rs2954741	31648709	17	15447777	T	C	-	-	-	2.3e-11	1	0	0	T	0.6697	0.1271	0.024	1.142e-07	T	0.671425	0.132152	0.0231104	2.9e-09	C	0.3639	-0.0307	0.1067	0.7734
17:17131869_C_T	rs1708618	31648709	17	17131869	T	C	-	-	-	4.2e-18	1	1	1	T	0.4676	-0.1863	0.0182	1.712e-24	T	0.466992	-0.197582	0.0216739	4e-20	C	0.5315	0.1674	0.0295	1.47e-08
17:19837929_A_G	rs1638528	31648709	17	19837929	A	G	-	-	-	9e-09	0	1	0	A	0.7353	-0.0857	0.0203	2.315e-05	A	0.734801	-0.142121	0.0243747	1.2e-09	G	0.2638	-0.0024	0.0321	0.9392
17:33390169_C_G	rs12453568	31648709	17	33390169	G	C	-	-	-	2.6e-08	0	0	0	C	0.0914	-0.1169	0.0316	0.0002128	G	0.913415	0.185607	0.0382562	5.8e-07	G	0.9013	0.0133	0.0495	0.7874
17:36855851_G_T	rs68075021	31648709	17	36855851	T	G	-	-	-	9.3e-15	1	1	1	T	0.8648	-0.1844	0.0268	5.488e-12	T	0.864017	-0.22102	0.0315414	7e-12	G	0.1338	0.1206	0.0439	0.006051
17:44189067_A_G	rs7225002	31648709	17	44189067	A	G	-	-	-	1.7e-10	1	0	0	A	0.5947	0.1281	0.0193	3.412e-11	A	0.589633	0.142069	0.0219201	9.9e-12	G	0.3941	-0.0975	0.0342	0.004379
17:45051187_C_CAT	rs749413172	31648709	17	45051187	CAT	C	-	-	-	2.1e-12	1	1	1	CAT	0.7907	0.1705	0.0224	2.607e-14	CAT	0.79687	0.190192	0.0268775	1.6e-12	C	0.2191	-0.1393	0.0356	9.136e-05
17:4856376_A_G	rs238238	31648709	17	4856376	A	G	-	-	-	2e-08	1	0	0	A	0.3069	-0.1676	0.02	4.919e-17	A	0.304171	-0.153852	0.0234273	1.4e-10	G	0.6882	0.1924	0.0331	6.065e-09
17:60993596_C_T	rs618945	31648709	17	60993596	T	C	-	-	-	1.2e-10	0	1	0	T	0.8879	0.1156	0.029	6.833e-05	T	0.896705	0.196447	0.0357196	1.2e-07	C	0.1245	-0.0025	0.0445	0.9558
17:71635852_A_G	rs62063640	31648709	17	71635852	G	A	-	-	-	1.1e-13	1	1	1	A	0.0618	-0.2549	0.0378	1.574e-11	G	0.938386	0.312832	0.0447086	3e-13	G	0.9379	0.1555	0.0617	0.01174
17:74684080_A_G	rs2286589	31648709	17	74684080	G	A	-	-	-	4.4e-20	1	1	1	A	0.4345	0.1869	0.0181	4.844e-25	G	0.565485	-0.202415	0.0217412	5.6e-21	G	0.5655	-0.1625	0.0287	1.445e-08
17:7617787_A_G	rs11870307	31648709	17	7617787	A	G	-	-	-	2.4e-08	1	0	0	A	0.2305	0.0947	0.0218	1.398e-05	A	0.225312	0.14506	0.0260611	2.2e-08	G	0.761	-0.0133	0.0349	0.7035
17:79356598_C_T	rs11658746	31648709	17	79356598	T	C	-	-	-	2.6e-09	1	0	0	T	0.6415	0.1066	0.0201	1.213e-07	T	0.637979	0.104809	0.0225102	8.9e-07	C	0.3501	-0.111	0.0369	0.002604
17:947627_C_G	rs2440035	31648709	17	947627	G	C	-	-	-	1.1e-09	1	1	1	C	0.5836	-0.1152	0.0187	7.684e-10	G	0.416489	0.126323	0.0218908	4.1e-09	G	0.4163	0.0949	0.0312	0.002327
18:12542101_A_G	rs12955490	31648709	18	12542101	G	A	-	-	-	2.1e-10	1	1	1	A	0.5153	-0.1354	0.018	5.911e-14	G	0.481568	0.142949	0.0215927	1e-10	G	0.4898	0.1233	0.0288	1.858e-05
18:19809469_A_G	rs4800374	31648709	18	19809469	A	G	-	-	-	1.6e-09	1	0	0	A	0.4627	-0.1001	0.018	2.706e-08	A	0.457879	-0.119139	0.021636	2.4e-08	G	0.5298	0.0701	0.0286	0.01428
18:20003625_C_T	rs4800401	31648709	18	20003625	C	T	-	-	-	3e-10	1	0	0	T	0.5852	0.1155	0.0184	3.492e-10	C	0.410375	-0.133631	0.0219087	2.8e-09	C	0.4222	-0.0855	0.0297	0.003988
18:20094918_G_T	rs28820387	31648709	18	20094918	T	G	-	-	-	1e-21	1	1	1	T	0.9475	-0.3894	0.0403	3.961e-22	T	0.948693	-0.452201	0.0487624	4e-21	G	0.0542	0.2944	0.0632	3.175e-06
18:25765144_C_G	rs72888107	31648709	18	25765144	C	G	-	-	-	2.1e-21	1	1	1	C	0.8355	0.2346	0.0244	7.251e-22	C	0.832844	0.274946	0.0288457	2.1e-20	G	0.1598	-0.1652	0.0399	3.424e-05
18:30004181_A_C	rs57978863	31648709	18	30004181	C	A	-	-	-	2.7e-11	1	1	1	A	0.1526	-0.1784	0.0255	2.505e-12	C	0.856073	0.209462	0.0309568	4.8e-12	C	0.8345	0.1322	0.0398	0.0008917
18:34289285_G_T	rs61735998	31648709	18	34289285	G	T	-	-	-	6e-31	1	1	1	T	0.0239	-0.8382	0.0629	1.535e-40	G	0.975956	0.869737	0.0703111	3e-35	G	0.9763	0.7624	0.1149	3.305e-11
18:58291005_A_G	rs34518901	31648709	18	58291005	G	A	-	-	-	4.8e-10	1	1	1	A	0.4015	-0.1171	0.023	3.639e-07	G	0.59879	0.115266	0.0221774	9.1e-07	G	0.5923	0.1545	0.1043	0.1386
18:64122863_A_G	rs9319710	31648709	18	64122863	A	G	-	-	-	4.1e-11	1	1	1	A	0.8243	0.1293	0.024	7.343e-08	A	0.83064	0.156793	0.0289555	1.7e-07	G	0.1855	-0.0867	0.038	0.02256
18:73025519_A_C	rs12606496	31648709	18	73025519	A	C	-	-	-	9.1e-10	0	1	0	A	0.5898	-0.0824	0.0182	5.872e-06	A	0.590045	-0.101621	0.0219493	3.4e-06	C	0.4106	0.0528	0.0287	0.06639
18:77156174_A_G	rs139536097	31648709	18	77156174	G	A	-	-	-	1.1e-09	1	1	1	A	0.1076	0.2403	0.0317	3.697e-14	G	0.892482	-0.239081	0.0357827	2.1e-11	G	0.8923	-0.2431	0.0569	1.971e-05
19:11271550_G_T	rs7260306	31648709	19	11271550	G	T	-	-	-	5.4e-16	1	1	1	T	0.4057	0.1366	0.0188	3.252e-13	G	0.592055	-0.178712	0.0219774	2e-16	G	0.5983	-0.0607	0.0311	0.05087
19:12429782_A_G	rs112896133	31648709	19	12429782	G	A	-	-	-	2.7e-09	0	1	0	A	0.0129	0.3886	0.088	9.975e-06	G	0.987508	-0.452292	0.0967993	2.1e-06	G	0.9861	-0.217	0.1674	0.1949
19:1208399_C_T	rs1978727	31648709	19	1208399	C	T	-	-	-	9.1e-12	1	1	1	T	0.3212	-0.1328	0.0207	1.464e-10	C	0.680755	0.157763	0.0231502	1.3e-11	C	0.6742	0.0724	0.0379	0.05595
19:17284931_C_T	rs112921283	31648709	19	17284931	C	T	-	-	-	5.6e-09	1	0	0	T	0.0808	-0.1213	0.034	0.0003649	C	0.917641	0.189976	0.0396764	2.3e-06	C	0.9221	-0.006	0.0569	0.9157
19:17386107_A_T	rs10418362	31648709	19	17386107	A	T	-	-	-	8.1e-11	1	0	0	A	0.8143	-0.1519	0.0235	9.645e-11	A	0.815385	-0.172444	0.027875	6.6e-10	T	0.1875	0.1175	0.038	0.001993
19:17464411_A_G	rs2162889	31648709	19	17464411	G	A	-	-	-	1.1e-11	1	1	1	A	0.7117	0.146	0.0203	6.971e-13	G	0.282851	-0.170986	0.023916	1.2e-12	G	0.2978	-0.1019	0.0335	0.002363
19:30109533_A_G	rs12986417	31648709	19	30109533	G	A	-	-	-	8.4e-14	1	1	1	A	0.3498	0.1395	0.019	2.115e-13	G	0.64919	-0.15372	0.0227449	1.4e-12	G	0.6518	-0.1167	0.0304	0.0001244
19:31187433_A_G	rs75260496	31648709	19	31187433	G	A	-	-	-	9.1e-10	0	1	0	A	0.0735	-0.1841	0.0366	5e-07	G	0.927594	0.224983	0.0414946	3.6e-08	G	0.9241	0.0939	0.065	0.1487
19:31913689_C_CT	rs201297907	31648709	19	31913689	CT	C	-	-	-	4e-09	0	1	0	CT	0.3869	0.087	0.0236	0.0002283	CT	0.387011	0.0925226	0.0227549	1.9e-05	C	0.6151	0.0194	0.1054	0.8542
19:36537108_C_T	rs62109742	31648709	19	36537108	T	C	-	-	-	4.6e-17	1	1	1	T	0.8897	-0.2471	0.0292	2.677e-17	T	0.895098	-0.267877	0.0351966	8.8e-15	C	0.1186	0.2148	0.0462	3.319e-06
19:39188112_A_G	rs11083475	31648709	19	39188112	G	A	-	-	-	3.4e-23	1	1	1	A	0.4742	-0.2065	0.0179	1.157e-30	G	0.516383	0.223926	0.0216138	2.3e-25	G	0.5404	0.1795	0.0284	2.54e-10
19:40780325_A_G	rs1991823	31648709	19	40780325	G	A	-	-	-	6.3e-19	1	1	1	A	0.6301	0.211	0.0186	1.062e-29	G	0.365388	-0.203337	0.0223242	1e-19	G	0.3771	-0.2234	0.0298	6.13e-14
19:45412079_C_T	rs7412	31648709	19	45412079	C	T	-	-	-	1.5e-15	1	1	1	T	0.0798	0.3128	0.0345	1.102e-19	C	0.920034	-0.328076	0.0396602	5.5e-17	C	0.9204	-0.2823	0.0591	1.787e-06
19:4976985_G_T	rs635271	31648709	19	4976985	G	T	-	-	-	3.3e-13	1	1	1	T	0.3129	-0.1322	0.0194	9.255e-12	G	0.688247	0.147715	0.0232469	1.3e-10	G	0.6854	0.1074	0.0309	0.0005103
19:49660889_A_G	rs3760662	31648709	19	49660889	A	G	-	-	-	1.9e-14	1	1	1	A	0.5539	0.1537	0.0188	2.602e-16	A	0.552072	0.153747	0.0217961	3.8e-13	G	0.4427	-0.1535	0.0316	1.215e-06
20:10840010_C_T	rs73086911	31648709	20	10840010	C	T	-	-	-	1.8e-08	1	0	0	T	0.038	0.2664	0.0498	8.55e-08	C	0.966002	-0.327603	0.0606757	9.6e-08	C	0.9561	-0.177	0.0773	0.02197
20:21111710_A_G	rs6075769	31648709	20	21111710	A	G	-	-	-	6.9e-09	0	1	0	A	0.2935	0.1013	0.0199	3.357e-07	A	0.297503	0.129952	0.0236435	4.8e-08	G	0.7132	-0.054	0.032	0.09098
20:25444618_C_T	rs59604901	31648709	20	25444618	T	C	-	-	-	9e-17	1	1	1	T	0.9383	0.3022	0.0379	1.441e-15	T	0.936618	0.369396	0.0441137	8e-17	C	0.0586	-0.1771	0.0634	0.005201
20:29554251_A_C	rs765217705	31648709	20	29554251	A	C	-	-	-	4.1e-10	0	0	0	A	0.9243	0.2496	0.0439	1.33e-08	A	0.924301	0.249624	0.0412846	2.9e-09	0	0	0	0	0
20:36869005_A_G	rs41282820	31648709	20	36869005	G	A	-	-	-	7.5e-37	1	0	0	A	0.0188	-1.0149	0.0727	2.483e-44	G	0.98222	1.04982	0.0813258	2.2e-39	G	0.9787	0.9314	0.1325	2.041e-12
20:36843992_A_G	rs6069234	31648709	20	36843992	A	G	-	-	-	2.5e-178	1	1	1	A	0.5384	0.5439	0.018	3.87e-201	A	0.537021	0.598066	0.0216308	1.1e-173	G	0.4595	-0.4593	0.0285	1.872e-58
20:37004036_A_G	rs11696479	31648709	20	37004036	A	G	-	-	-	1.2e-09	1	0	0	A	0.8535	0.1158	0.0259	8.11e-06	A	0.852064	0.130524	0.0307317	1e-05	G	0.144	-0.0907	0.0422	0.03164
20:39832628_C_T	rs17265513	31648709	20	39832628	T	C	-	-	-	2.9e-12	1	1	1	T	0.8109	-0.172	0.0235	2.47e-13	T	0.80969	-0.198648	0.0275011	1.4e-12	C	0.187	0.1236	0.039	0.001524
20:42939693_C_T	rs148377517	31648709	20	42939693	C	T	-	-	-	5.2e-14	1	1	1	T	0.015	0.6369	0.0824	1.083e-14	C	0.98529	-0.6651	0.0892877	3.6e-14	C	0.9841	-0.5512	0.1639	0.0007736
20:44730817_C_T	rs76926652	31648709	20	44730817	C	T	-	-	-	9.1e-09	0	1	0	T	0.2381	0.0733	0.0212	0.0005503	C	0.758993	-0.134514	0.0253083	9.5e-08	C	0.7666	0.0268	0.0341	0.4322
20:48007200_A_G	rs9636516	31648709	20	48007200	G	A	-	-	-	2.6e-08	0	0	0	A	0.3485	0.1028	0.0192	8.336e-08	G	0.649331	-0.121466	0.0227106	1.3e-07	G	0.6553	-0.071	0.0312	0.02281
20:57466093_G_T	rs185799410	31648709	20	57466093	G	T	-	-	-	5.2e-16	1	1	1	T	0.0271	-0.526	0.0618	1.762e-17	G	0.974815	0.565155	0.0697337	6e-16	G	0.9686	0.4372	0.1107	7.887e-05
20:61161954_A_G	rs13040737	31648709	20	61161954	G	A	-	-	-	6.4e-14	1	1	1	A	0.2312	0.2093	0.0219	1.136e-21	G	0.769193	-0.179409	0.0257581	6.4e-12	G	0.768	-0.2619	0.036	3.619e-13
20:62846437_C_T	rs35478345	31648709	20	62846437	T	C	-	-	-	6e-11	0	1	0	T	0.8376	-0.1305	0.0245	9.914e-08	T	0.839763	-0.171243	0.0294363	6.6e-10	C	0.1657	0.0664	0.0389	0.08815
21:18804941_C_T	rs112792716	31648709	21	18804941	C	T	-	-	-	1.4e-14	1	1	1	T	0.0244	-0.6055	0.0811	8.459e-14	C	0.986004	0.712763	0.0955162	1.3e-13	C	0.9574	0.4171	0.1334	0.001762
21:18915218_A_G	rs2824341	31648709	21	18915218	G	A	-	-	-	2.3e-13	1	1	1	A	0.2011	0.2256	0.0226	1.689e-23	G	0.80421	-0.229268	0.0273798	2.7e-17	G	0.791	-0.2201	0.0354	5.054e-10
21:30123533_A_G	rs57448815	31648709	21	30123533	A	G	-	-	-	5.3e-10	0	1	0	A	0.8603	0.1476	0.0268	3.461e-08	A	0.854783	0.173839	0.0308096	9.7e-09	G	0.1287	-0.0953	0.0459	0.03781
21:35377591_C_T	rs11702230	31648709	21	35377591	C	T	-	-	-	7.3e-15	1	1	1	T	0.1231	0.2361	0.0275	8.082e-18	C	0.88196	-0.262349	0.033528	1.1e-14	C	0.8696	-0.198	0.0426	3.368e-06
22:20098887_C_CT	rs749085725	31648709	22	20098887	CT	C	-	-	-	3.6e-09	1	1	1	CT	0.8065	-0.1726	0.0294	4.21e-09	CT	0.806506	-0.173152	0.0277077	7e-10	C	0.1875	0.0985	0.3456	0.7756
22:28181436_A_C	rs382819	31648709	22	28181436	A	C	-	-	-	2.5e-15	1	1	1	A	0.2793	0.1676	0.0211	1.899e-15	A	0.2832	0.180988	0.023913	3.8e-14	C	0.7291	-0.1382	0.0373	0.0002101
22:41748903_A_G	rs140435195	31648709	22	41748903	G	A	-	-	-	4.1e-08	0	0	0	A	0.0297	0.2866	0.0567	4.292e-07	G	0.970281	-0.342082	0.0640251	5.1e-08	G	0.9702	-0.1617	0.1012	0.1098
22:47192583_C_G	rs743139	31648709	22	47192583	C	G	-	-	-	4.5e-08	0	0	0	C	0.3596	0.0727	0.019	0.0001349	C	0.365414	0.0960598	0.0226425	1.7e-05	G	0.6502	-0.0338	0.0308	0.2737
1:10731307_A_AAG	1:10731307_AAG_A	31648709	1	10731307	AAG	A	-	-	-	8.8e-16	1	1	1	A	0.0396	0.4954	0.047	5.789e-26	AAG	0.960727	-0.510841	0.055467	1.8e-20	A	0.0402	0.4686	0.077	1.148e-09
1:201885644_A_AAAAAC	1:201885644_AAAAAC_A	31648709	1	201885644	AAAAAC	A	-	-	-	4.5e-09	0	1	0	A	0.7899	0.1111	0.0225	7.505e-07	AAAAAC	0.19746	-0.147851	0.0270625	2.7e-08	A	0.7704	0.0541	0.0355	0.1276
1:28715988_C_CT	1:28715988_CT_C	31648709	1	28715988	CT	C	-	-	-	1.7e-11	1	1	1	CT	0.6887	-0.1634	0.0247	3.984e-11	CT	0.688714	-0.164945	0.0233328	2.4e-12	C	0.3068	-0.0448	0.2821	0.8738
2:24571059_A_ATT	2:24571059_ATT_A	31648709	2	24571059	ATT	A	-	-	-	2.5e-09	1	1	1	A	0.9514	0.2625	0.0535	9.254e-07	ATT	0.0486348	-0.264819	0.0504359	2.8e-08	A	0.957	-0.105	0.6731	0.8761
2:57393644_G_GATA	2:57393644_GATA_G	31648709	2	57393644	GATA	G	-	-	-	2.2e-09	0	1	0	G	0.3841	0.0567	0.0185	0.002115	GATA	0.611934	-0.0978832	0.0221346	3.9e-06	G	0.3779	-0.0087	0.0294	0.7683
2:8749400_C_CCTACT	2:8749400_CCTACT_C	31648709	2	8749400	CCTACT	C	-	-	-	3.1e-11	1	0	0	CCTACT	0.6113	0.1437	0.0235	9.038e-10	CCTACT	0.611328	0.143694	0.0220452	5.6e-11	0	0	0	0	0
3:185319427_C_CTT	3:185319427_CTT_C	31648709	3	185319427	CTT	C	-	-	-	2.9e-12	1	1	1	CTT	0.5952	-0.1634	0.0233	2.446e-12	CTT	0.595186	-0.166299	0.0220044	4.7e-14	C	0.4091	-0.2028	0.261	0.4372
4:23797961_G_GAGAA	4:23797961_GAGAA_G	31648709	4	23797961	GAGAA	G	-	-	-	2.3e-11	1	1	1	G	0.0147	-0.6214	0.0802	9.393e-15	GAGAA	0.984882	0.609399	0.0889899	2.8e-11	G	0.0135	-0.6517	0.1494	1.286e-05
4:6301628_TTGTG_TTGTGTG	4:6301628_TTGTGTG_TTGTG	31648709	4	6301628	TTGTGTG	TTGTG	-	-	-	2.3e-10	1	0	0	TTGTG	0.7288	0.1528	0.0258	3.344e-09	TTGTGTG	0.271157	-0.152802	0.024282	1.1e-09	0	0	0	0	0
5:45017575_G_GTGTACAGTAA	5:45017575_GTGTACAGTAA_G	31648709	5	45017575	GTGTACAGTAA	G	-	-	-	2.3e-14	1	1	1	G	0.0677	0.2964	0.0378	4.798e-15	GTGTACAGTAA	0.928784	-0.324937	0.0417852	5.3e-16	G	0.0584	0.2214	0.0714	0.001935
6:122514171_C_CTTTT	6:122514171_CTTTT_C	31648709	6	122514171	CTTTT	C	-	-	-	7.3e-36	1	1	1	CTTTT	0.6539	-0.2692	0.024	3.14e-29	CTTTT	0.654073	-0.27169	0.0226291	3.8e-34	C	0.3647	-0.0502	0.2701	0.8527
6:18004222_C_CA	6:18004222_CA_C	31648709	6	18004222	CA	C	-	-	-	2.8e-10	1	1	1	CA	0.8178	0.1532	0.0234	5.767e-11	CA	0.823495	0.178565	0.0282847	2.3e-10	C	0.1908	-0.1145	0.0368	0.001872
7:28209953_G_GAT	7:28209953_GAT_G	31648709	7	28209953	GAT	G	-	-	-	6.4e-09	1	0	0	G	0.5294	-0.1463	0.0184	1.735e-15	GAT	0.463867	0.153898	0.0216429	7.9e-12	G	0.5176	-0.1329	0.0302	1.083e-05
8:11787818_T_TA	8:11787818_T_TA	31648709	8	11787818	T	TA	-	-	-	3.7e-11	1	1	1	T	0.7199	0.1395	0.0258	6.102e-08	T	0.720039	0.137768	0.024304	5.9e-09	T	0.7044	0.356	0.286	0.2132
9:129342099_A_AAT	9:129342099_AAT_A	31648709	9	129342099	AAT	A	-	-	-	2.9e-23	1	1	1	A	0.2624	0.2477	0.0262	3.417e-21	AAT	0.737829	-0.246157	0.0247342	1e-23	A	0.2901	0.4267	0.2845	0.1336
9:136149709_A_AC	9:136149709_AC_A	31648709	9	136149709	AC	A	-	-	-	1.8e-09	1	1	1	A	0.1763	-0.1559	0.024	8.654e-11	AC	0.825736	0.193856	0.0286696	9.7e-12	A	0.1797	-0.0939	0.0386	0.01507
11:102054822_A_AAAAAG	11:102054822_AAAAAG_A	31648709	11	102054822	AAAAAG	A	-	-	-	8.1e-12	1	1	1	A	0.3239	0.1373	0.0197	2.788e-12	AAAAAG	0.670628	-0.170097	0.0232198	2.9e-13	A	0.3146	0.0809	0.0321	0.01171
15:35773179_T_TA	15:35773179_TA_T	31648709	15	35773179	TA	T	-	-	-	5.7e-10	0	1	0	T	0.8614	0.1748	0.0338	2.278e-07	TA	0.1385	-0.176086	0.0318764	3.5e-08	T	0.8516	0.0201	0.3724	0.9569
16:1736384_A_AG	16:1736384_AG_A	31648709	16	1736384	AG	A	-	-	-	1.8e-08	1	0	0	A	0.0829	-0.1966	0.0364	6.366e-08	AG	0.937596	0.261072	0.0467024	8.4e-09	A	0.1065	-0.1224	0.0528	0.0204
16:16137152_T_TTTTTTTTGTTTTG	16:16137152_TTTTTTTTGTTTTG_T	31648709	16	16137152	TTTTTTTTGTTTTG	T	-	-	-	1.1e-14	1	1	1	T	0.205	-0.1847	0.0223	1.332e-16	TTTTTTTTGTTTTG	0.79259	0.179696	0.0266009	5.3e-12	T	0.2009	-0.193	0.036	8.052e-08
16:53520037_G_GA	16:53520037_GA_G	31648709	16	53520037	GA	G	-	-	-	6.8e-21	1	1	1	G	0.4406	-0.2149	0.0232	2.092e-20	GA	0.559334	0.212626	0.0219045	4e-23	G	0.4307	-0.5149	0.2623	0.04968
17:17549939_C_CTG	17:17549939_CTG_C	31648709	17	17549939	CTG	C	-	-	-	1.5e-09	1	0	0	CTG	0.5982	0.1	0.0188	1.026e-07	CTG	0.580835	0.114548	0.0218787	1.4e-07	C	0.3694	-0.0728	0.0315	0.02101
18:25400833_C_CT	18:25400833_CT_C	31648709	18	25400833	CT	C	-	-	-	2.2e-08	1	0	0	CT	0.6547	-0.1163	0.0241	1.419e-06	CT	0.654509	-0.117299	0.0227505	2e-08	C	0.3256	-0.0167	0.2782	0.9522
18:3249904_T_TAAATAA	18:3249904_TAAATAA_T	31648709	18	3249904	TAAATAA	T	-	-	-	2.2e-13	1	1	1	T	0.1372	-0.2062	0.0263	4.566e-15	TAAATAA	0.868139	0.231517	0.0318691	3.9e-13	T	0.1452	-0.168	0.0413	4.709e-05
18:6730170_T_TAGCA	18:6730170_TAGCA_T	31648709	18	6730170	TAGCA	T	-	-	-	2.1e-09	1	1	1	T	0.5176	0.1206	0.0182	3.439e-11	TAGCA	0.480125	-0.125206	0.0217267	3.3e-09	T	0.514	0.113	0.0292	0.000107
22:39151057_C_CG	22:39151057_CG_C	31648709	22	39151057	CG	C	-	-	-	2.6e-33	1	1	1	CG	0.704	0.2809	0.0252	6.46e-29	CG	0.703833	0.283272	0.0238528	4.1e-33	C	0.286	-0.139	0.1941	0.4741
1:6272136_G_GA	rs145358377	27798624	1	6272136	GA	G	0.36	-0.2594	0.0387	1.941e-11	1	1	1	G	0.1804	0.1982	0.0331	2.092e-09	GA	0.953137	-0.0913155	0.0515135	0.074	G	0.2569	0.2595	0.0411	2.612e-10
1:10000476_A_T	rs182770070	27798624	1	10000476	T	A	0.01	0.9396	0.1767	1.053e-07	1	0	0	A	0.9894	-0.7758	0.0982	2.702e-15	A	0.988891	-0.79469	0.103092	1.1e-14	T	0.0084	0.7001	0.2177	0.001305
1:45012273_A_C	rs272564	27798624	1	45012273	C	A	0.28	0.351	0.0373	4.507e-21	1	1	1	A	0.715	-0.3581	0.0203	1.723e-69	A	0.714093	-0.408844	0.0240159	1.1e-67	C	0.2835	0.2708	0.0332	3.531e-16
1:87893132_A_G	rs2152735	27798624	1	87893132	A	G	0.33	-0.3061	0.0355	7.232e-18	1	1	1	A	0.3337	-0.2373	0.0192	3.479e-35	G	0.6689	0.264743	0.022982	1.1e-30	G	0.6621	0.1936	0.0306	2.488e-10
1:207961732_A_G	rs41317993	27798624	1	207961732	A	G	0.1	0.6304	0.0545	5.421e-31	1	1	1	A	0.1042	0.6334	0.0298	1.92e-100	G	0.897356	-0.614073	0.035409	8.2e-69	G	0.8932	-0.6655	0.0481	1.377e-43
1:217722890_C_CT	rs11454451	27798624	1	217722890	CT	C	0.26	0.2558	0.0378	1.29e-11	1	1	1	CT	0.2588	0.1854	0.0208	4.373e-19	C	0.745086	-0.193747	0.0248994	3.2e-15	C	0.7351	-0.172	0.0331	1.978e-07
2:27730940_C_T	rs1260326	27798624	2	27730940	C	T	0.39	-0.2746	0.0338	4.285e-16	1	1	1	T	0.3887	0.292	0.0188	1.638e-54	T	0.388069	0.308134	0.022056	1.7e-46	C	0.6103	-0.2632	0.031	2.04e-17
2:60006705_G_T	rs12713404	27798624	2	60006705	T	G	0.38	-0.1992	0.0347	9.327e-09	1	1	1	T	0.6208	-0.1909	0.0185	5.199e-25	G	0.382028	0.225968	0.0223448	1.1e-23	G	0.3748	0.1374	0.0291	2.376e-06
2:66725062_C_T	rs62144050	27798624	2	66725062	C	T	0.28	0.2246	0.0429	1.618e-07	1	0	0	T	0.7179	-0.1839	0.0231	1.626e-15	T	0.715686	-0.213589	0.0237409	7.2e-20	C	0.2709	0.0337	0.0563	0.5499
2:160052731_A_C	rs17494056	27798624	2	160052731	C	A	0.27	-0.1844	0.0372	7e-07	1	0	0	A	0.7312	0.1201	0.0204	4.296e-09	A	0.732364	0.160801	0.0243405	3.7e-11	C	0.2706	-0.0527	0.033	0.111
2:175547672_G_GCCGCCGCCCCC	rs564190295	27798624	2	175547672	GCCGCCGCCCCC	G	0.15	-0.3545	0.057	4.953e-10	1	1	1	G	0.8537	0.2148	0.0324	3.284e-11	G	0.854311	0.205888	0.0312731	7.4e-12	G	0.8433	0.3719	0.1387	0.007312
2:179725237_G_T	rs151041685	27798624	2	179725237	T	G	0.09	1.0613	0.058	7.858e-75	1	1	1	T	0.0872	1.0101	0.0319	2.23e-219	G	0.914794	-1.04207	0.0383305	6.9e-163	G	0.9097	-0.9594	0.0509	2.299e-79
2:188242369_A_G	rs62172372	27798624	2	188242369	G	A	0.19	0.3365	0.0416	5.992e-16	1	1	1	A	0.8002	-0.3326	0.0229	1.016e-47	A	0.808262	-0.368745	0.027603	7.2e-43	G	0.2124	0.2764	0.0363	2.462e-14
2:220299541_G_T	rs907683	27798624	2	220299541	T	G	0.43	-0.3335	0.0357	1.021e-20	1	1	1	T	0.5622	-0.3336	0.0196	1.037e-64	G	0.436199	0.32331	0.0223128	9.1e-49	G	0.4413	0.3558	0.0346	8.244e-25
2:228134155_C_T	rs4608502	27798624	2	228134155	C	T	0.33	0.2486	0.0353	1.853e-12	1	1	1	T	0.3305	-0.2299	0.019	7.042e-34	T	0.325696	-0.243832	0.0229274	7.9e-27	C	0.6622	0.2088	0.0298	2.324e-12
2:232268884_A_C	rs13002735	27798624	2	232268884	C	A	0.24	-0.3305	0.0387	1.294e-17	1	1	1	A	0.7574	0.3157	0.0209	9.186e-52	A	0.763092	0.346485	0.0252794	3.2e-42	C	0.2513	-0.2693	0.0327	1.852e-16
3:38621237_C_G	rs41312411	27798624	3	38621237	G	C	0.15	-0.32	0.047	1.339e-11	1	1	1	C	0.8529	0.2768	0.0257	4.36e-27	C	0.851851	0.328857	0.030489	4.3e-27	G	0.1453	-0.1894	0.0416	5.418e-06
3:49770032_A_G	rs3749237	27798624	3	49770032	A	G	0.32	0.2583	0.0354	3.085e-13	1	1	1	A	0.3132	0.2318	0.0196	2.015e-32	G	0.681073	-0.262119	0.0229978	1.7e-31	G	0.6968	-0.1783	0.0322	3.04e-08
3:53455569_G_T	rs2358740	27798624	3	53455569	T	G	0.32	-0.2079	0.0352	3.578e-09	1	1	1	T	0.3185	-0.2217	0.0193	1.277e-30	G	0.681644	0.230701	0.0231241	1.9e-25	G	0.6813	0.2074	0.0307	1.541e-11
3:69410725_A_G	rs1483890	27798624	3	69410725	G	A	0.3	0.2836	0.0359	2.542e-15	1	1	1	A	0.6879	-0.2184	0.0194	2.604e-29	A	0.693545	-0.234945	0.0234913	1.5e-25	G	0.3207	0.1932	0.0306	2.545e-10
3:122090102_A_G	rs11920570	27798624	3	122090102	A	G	0.26	0.2676	0.0371	5.176e-13	1	1	1	A	0.2667	0.19	0.0203	6.424e-21	G	0.735938	-0.233082	0.024377	3.6e-22	G	0.7292	-0.1228	0.0321	0.000129
3:179172979_G_T	rs7612445	27798624	3	179172979	T	G	0.19	-0.4276	0.042	2.413e-24	1	1	1	T	0.1987	-0.3841	0.023	1.645e-62	G	0.806431	0.38046	0.0274655	2.1e-44	G	0.7929	0.3901	0.037	5.983e-26
4:23951018_C_G	rs12501032	27798624	4	23951018	G	C	0.31	0.2878	0.0362	1.827e-15	1	1	1	C	0.6984	-0.2888	0.0201	1.323e-46	C	0.694841	-0.314929	0.0235662	2.7e-42	G	0.2952	0.2412	0.0335	5.778e-13
4:143462437_C_T	rs1425518	27798624	4	143462437	T	C	0.2	-0.1824	0.0419	1.361e-05	0	0	0	T	0.2053	-0.0515	0.0225	0.02212	C	0.798261	0.0649204	0.0269575	0.02	C	0.789	0.03	0.0359	0.4022
4:148974602_C_T	rs6845865	27798624	4	148974602	C	T	0.16	-0.3423	0.0448	2.249e-14	1	1	1	T	0.8263	0.3098	0.0247	4.141e-36	T	0.834934	0.354181	0.0291991	5.7e-35	C	0.1885	-0.2338	0.0403	6.8e-09
5:30888583_A_T	rs13165531	27798624	5	30888583	T	A	0.42	-0.221	0.0335	4.311e-11	1	1	1	A	0.4215	0.1685	0.0181	1.172e-20	A	0.416815	0.175293	0.0217936	6.6e-15	T	0.5713	-0.158	0.0286	3.173e-08
5:137541385_G_GA	rs35284930	27798624	5	137541385	G	GA	0.42	-0.2933	-	-	1	0	0	G	0.4168	-0.2011	0.0242	1.012e-16	GA	0.583097	0.199175	0.0228388	7.3e-19	G	0.4077	-0.4676	0.2849	0.1007
5:137552970_C_T	rs146833	27798624	5	137552970	C	T	0.63	-0.2548	0.0342	9.53e-14	1	1	1	T	0.6326	0.1881	0.0186	4.931e-24	T	0.628313	0.213479	0.0222495	2.9e-22	C	0.3606	-0.1472	0.0298	8.066e-07
5:172643118_A_G	rs4868243	27798624	5	172643118	A	G	0.16	-0.361	0.0444	4.076e-16	1	1	1	A	0.1743	-0.3229	0.0242	9.392e-41	G	0.835489	0.312677	0.0292119	3.7e-26	G	0.8109	0.3384	0.038	5.09e-19
6:7554839_A_T	rs2744375	27798624	6	7554839	T	A	0.16	0.2403	0.0459	1.602e-07	1	1	0	A	0.8425	-0.2117	0.0248	1.403e-17	A	0.843592	-0.254663	0.0297181	2.5e-17	T	0.1592	0.143	0.0396	0.0002993
6:36820565_A_G	rs236349	27798624	6	36820565	G	A	0.34	0.2812	0.035	1.012e-15	1	1	1	A	0.3397	-0.2603	0.0193	1.198e-41	A	0.339647	-0.267533	0.022736	3.4e-34	G	0.6602	0.2479	0.0315	3.493e-15
6:118559658_A_T	rs3951016	27798624	6	118559658	A	T	0.47	0.5196	0.0332	2.954e-55	1	1	1	A	0.473	0.4444	0.018	6.12e-135	T	0.527947	-0.492948	0.0215847	1.8e-118	T	0.5255	-0.3677	0.0286	5.957e-38
6:122168138_C_T	rs1320761	27798624	6	122168138	T	C	0.11	0.9018	0.0531	1.22e-64	1	1	1	T	0.1261	0.9655	0.0288	1.08e-245	C	0.892051	-1.0083	0.035343	3.6e-182	C	0.848	-0.9043	0.0445	8.09e-92
7:35258277_C_T	rs58437978	27798624	7	35258277	C	T	0.5	-0.2402	0.0343	2.609e-12	1	1	1	T	0.5058	0.1813	0.0186	2.023e-22	T	0.50089	0.211391	0.0217873	2.3e-22	C	0.4853	-0.1267	0.0309	4.111e-05
7:93550415_C_G	rs180239	27798624	7	93550415	C	G	0.35	-0.326	0.0346	4.539e-21	1	1	1	C	0.6494	-0.342	0.0189	1.758e-73	G	0.35005	0.347142	0.0225523	3.2e-54	G	0.3515	0.3336	0.0302	2.04e-28
7:100493359_A_G	rs17881696	27798624	7	100493359	A	G	0.18	0.5784	0.0428	1.183e-41	1	1	1	A	0.1807	0.6122	0.0234	2.35e-151	G	0.821094	-0.655915	0.0279898	3.3e-122	G	0.8165	-0.5423	0.0373	7.754e-48
7:116446573_G_T	rs41748	27798624	7	116446573	G	T	0.45	-0.1926	0.0333	7.143e-09	1	1	1	T	0.5592	0.1622	0.0182	4.574e-19	T	0.555231	0.194843	0.0217837	6.1e-19	G	0.4344	-0.11	0.029	0.0001511
7:126970046_C_G	rs11563648	27798624	7	126970046	C	G	0.27	-0.2311	0.0371	4.417e-10	1	1	1	C	0.7315	-0.1574	0.0204	1.099e-14	G	0.270591	0.167097	0.0242229	5.5e-12	G	0.2651	0.1412	0.0329	1.809e-05
7:130965408_A_AT	rs138186803	27798624	7	130965408	A	AT	0.41	-0.3328	0.0402	1.265e-16	1	1	1	A	0.5884	-0.3023	0.0231	2.834e-39	AT	0.410589	0.291542	0.0222124	3.2e-39	A	0.5685	-0.5141	0.1038	7.285e-07
7:136576100_A_G	rs73158705	27798624	7	136576100	G	A	0.16	0.3929	0.0451	2.806e-18	1	1	1	A	0.8329	-0.3648	0.0243	4.726e-51	A	0.837144	-0.363811	0.0292983	1.3e-36	G	0.1737	0.3663	0.0383	1.054e-21
8:144981488_A_G	rs56233017	27798624	8	144981488	A	G	0.04	-0.6662	0.0831	1.086e-15	1	1	1	A	0.0448	-0.5088	0.0469	2.112e-27	G	0.956341	0.548156	0.0536263	4.1e-25	G	0.9529	0.4266	0.0816	1.682e-07
9:35909518_A_G	rs748802	27798624	9	35909518	A	G	0.34	-0.2022	0.0354	1.127e-08	1	1	0	A	0.3423	-0.1896	0.0193	7.129e-23	G	0.660289	0.231757	0.0231868	6.8e-24	G	0.6536	0.1239	0.0305	4.705e-05
9:99196094_C_G	rs10820614	27798624	9	99196094	C	G	0.21	-0.1854	0.0408	5.649e-06	1	1	0	C	0.2114	-0.1499	0.0224	2.187e-11	G	0.793381	0.143994	0.0268276	1.8e-08	G	0.7809	0.1595	0.0358	8.638e-06
9:128278739_A_G	rs10739663	27798624	9	128278739	G	A	0.45	-0.2656	0.0331	9.62e-16	1	1	1	A	0.5424	0.23	0.018	1.957e-37	A	0.544306	0.28026	0.0216116	3.7e-38	G	0.4607	-0.1508	0.0286	1.405e-07
11:44980383_A_G	rs12576326	27798624	11	44980383	G	A	0.34	0.2528	0.0356	1.197e-12	1	1	1	A	0.6641	-0.2063	0.0197	9.284e-26	A	0.664258	-0.226053	0.022771	5.8e-24	G	0.3361	0.1682	0.0333	4.366e-07
11:61542006_G_GA	rs11320420	27798624	11	61542006	G	GA	0.34	0.4266	-	-	1	0	0	G	0.3427	0.3349	0.0244	5.462e-43	GA	0.657155	-0.334602	0.0229828	5.7e-50	G	0.3192	0.3687	0.2764	0.1822
11:61551927_A_C	rs174536	27798624	11	61551927	C	A	0.66	0.399	0.0348	1.651e-30	1	1	1	A	0.6602	-0.3514	0.019	4.57e-76	A	0.659404	-0.339998	0.0228065	1.8e-52	C	0.3386	0.3696	0.0304	5.377e-34
11:128764571_A_C	rs75190942	27798624	11	128764571	A	C	0.09	-0.4962	0.0599	1.193e-16	1	1	1	A	0.0868	-0.4697	0.0335	9.07e-45	C	0.911753	0.440241	0.0378285	2.2e-32	C	0.9164	0.5356	0.0596	2.56e-19
12:2184466_C_G	rs2283274	27798624	12	2184466	C	G	0.18	-0.4051	0.0444	7.212e-20	1	1	1	C	0.1862	-0.4331	0.0237	1.771e-74	G	0.821265	0.500453	0.0284018	3e-69	G	0.8019	0.325	0.0379	9.11e-18
12:20472202_C_T	rs10841486	27798624	12	20472202	C	T	0.22	-0.2382	0.0401	2.983e-09	1	1	1	T	0.787	0.249	0.0222	3.867e-29	T	0.783637	0.280227	0.026139	4.5e-27	C	0.2072	-0.1939	0.0366	1.209e-07
12:24758480_A_G	rs4963772	27798624	12	24758480	A	G	0.15	-0.7139	0.0465	3.228e-53	1	1	1	A	0.1512	-0.6621	0.0251	5.47e-153	G	0.848983	0.710846	0.0300261	3.3e-127	G	0.8486	0.5831	0.0403	1.996e-47
12:27955296_C_T	rs1050288	27798624	12	27955296	T	C	0.34	-0.2125	0.0357	2.738e-09	1	0	0	T	0.3427	-0.2174	0.0196	1.127e-28	C	0.658005	0.241339	0.0228648	1.3e-26	C	0.6559	0.1735	0.0326	1.029e-07
12:33682405_C_T	rs1994135	27798624	12	33682405	C	T	0.47	0.4	0.033	7.186e-34	1	1	1	T	0.539	-0.4075	0.0181	1.31e-112	T	0.528418	-0.434252	0.0216711	1.8e-90	C	0.4441	0.3649	0.0288	1.146e-36
12:37930102_A_G	rs10880689	27798624	12	37930102	G	A	0.6	0.2084	0.0339	8.103e-10	1	0	0	A	0.6091	-0.2325	0.0188	4.582e-35	A	0.60267	-0.249313	0.0220168	1.1e-30	G	0.3791	0.202	0.0313	1.135e-10
12:37945516_C_T	rs11183443	27798624	12	37945516	C	T	0.13	0.6763	-	-	1	0	0	T	0.7684	-0.3215	0.032	9.18e-24	T	0.769193	-0.320019	0.0302109	6.1e-27	C	0.3065	0.4651	0.3171	0.1425
12:64976850_C_T	rs867400	27798624	12	64976850	C	T	0.43	0.2983	0.0334	4.583e-19	1	1	1	T	0.4356	-0.2436	0.0181	3.548e-41	T	0.431842	-0.272527	0.0217792	1.3e-35	C	0.5586	0.198	0.0288	6.62e-12
12:82219376_C_T	rs12579753	27798624	12	82219376	T	C	0.23	-0.2456	0.0394	4.805e-10	1	1	1	T	0.2225	-0.2013	0.0216	1.306e-20	C	0.775469	0.228851	0.0258239	2.8e-18	C	0.7807	0.1564	0.0347	6.434e-06
14:21542766_A_G	rs12889267	27798624	14	21542766	G	A	0.16	0.4164	0.0453	3.611e-20	1	1	1	A	0.8369	-0.4584	0.025	3.972e-75	A	0.836397	-0.497384	0.0290407	9.7e-68	G	0.1621	0.3847	0.0421	6.6e-20
14:23864804_C_T	rs422068	27798624	14	23864804	C	T	0.36	0.7307	0.0343	1.52e-100	1	1	1	T	0.637	-0.7281	0.0188	8.89e-330	T	0.63695	-0.783915	0.0224358	7.4e-271	C	0.3629	0.6381	0.03	3.09e-100
14:72885471_C_G	rs17180489	27798624	14	72885471	C	G	0.14	-0.4896	0.0554	9.15e-19	1	1	1	C	0.1406	-0.5338	0.0294	1.475e-73	G	0.858185	0.581302	0.0308261	3.2e-80	G	0.8646	0.3382	0.0659	2.87e-07
14:78379684_C_T	rs1549118	27798624	14	78379684	T	C	0.28	0.2003	0.0367	4.666e-08	1	0	0	T	0.2891	0.1443	0.02	4.913e-13	C	0.718024	-0.166219	0.0240053	6.7e-12	C	0.6997	-0.1099	0.0317	0.0005283
14:85796564_A_G	rs17201923	27798624	14	85796564	G	A	0.28	-0.4096	0.0367	6.549e-29	1	1	1	A	0.7207	0.4246	0.0201	1.65e-99	A	0.722374	0.449021	0.0241277	5.6e-80	G	0.2819	-0.3864	0.0318	5.615e-34
14:91583373_A_C	rs4900069	27798624	14	91583373	C	A	0.37	0.1999	0.0343	5.377e-09	1	1	1	A	0.3785	-0.1562	0.0186	5.198e-17	A	0.374733	-0.170553	0.0223092	4.3e-14	C	0.6155	0.1332	0.0298	7.657e-06
15:73663903_A_T	rs7173389	27798624	15	73663903	T	A	0.16	-0.5393	0.0453	1.313e-32	1	1	1	A	0.8382	0.4759	0.0243	4.488e-85	A	0.841279	0.512778	0.0294489	2.2e-69	T	0.1666	-0.4197	0.0383	6.927e-28
16:10811687_A_C	rs1592560	27798624	16	10811687	C	A	0.4	-0.1826	0.0346	1.336e-07	1	0	0	A	0.4027	0.1395	0.019	2.199e-13	A	0.402263	0.170461	0.0224534	1.2e-14	C	0.5965	-0.086	0.0311	0.005662
16:15910743_A_G	rs3915499	27798624	16	15910743	A	G	0.32	0.303	0.0354	1.242e-17	1	1	1	A	0.3236	0.3464	0.0195	9.086e-71	G	0.679487	-0.361827	0.0231505	7.8e-55	G	0.6713	-0.3207	0.0315	2.58e-24
16:65286870_C_T	rs7194801	27798624	16	65286870	C	T	0.43	-0.2907	0.0334	3.579e-18	1	1	1	T	0.4319	0.3016	0.0183	4.023e-61	T	0.431567	0.325339	0.0218092	1.5e-50	C	0.5676	-0.2627	0.0294	4.577e-19
17:15195279_C_T	rs79121763	27798624	17	15195279	T	C	0.09	-0.471	0.0629	7.174e-14	1	1	1	T	0.0849	-0.3746	0.0343	7.649e-28	C	0.91155	0.424515	0.0382447	2.7e-30	C	0.9236	0.2534	0.0628	5.453e-05
17:17716531_A_G	rs12941356	27798624	17	17716531	G	A	0.42	-0.1809	0.0333	5.489e-08	1	0	0	A	0.4366	0.163	0.0184	8.674e-19	A	0.426978	0.201163	0.0221206	8.2e-20	G	0.5482	-0.1028	0.0293	0.0004567
18:20129524_A_C	rs117159291	27798624	18	20129524	C	A	0.05	0.4038	0.0768	1.479e-07	1	0	0	A	0.9499	-0.3942	0.0418	4.077e-21	A	0.950296	-0.460723	0.0500056	1.9e-20	C	0.0508	0.287	0.0669	1.808e-05
18:25766218_A_C	rs11083258	27798624	18	25766218	C	A	0.17	-0.2761	0.0445	5.508e-10	1	1	1	A	0.8355	0.2381	0.0245	2.232e-22	A	0.832707	0.275148	0.0288255	1.9e-20	C	0.1596	-0.1733	0.0402	1.633e-05
18:30003322_A_G	rs11081761	27798624	18	30003322	A	G	0.15	-0.2669	0.0469	1.247e-08	1	0	0	A	0.1556	-0.177	0.0255	4.163e-12	G	0.85289	0.197168	0.0306239	4.3e-11	G	0.8309	0.1449	0.0407	0.0003662
18:34289285_G_T	rs61735998	27798624	18	34289285	T	G	0.02	-0.8338	0.109	2.059e-14	1	1	1	T	0.0239	-0.8382	0.0629	1.535e-40	G	0.975956	0.869737	0.0703111	3e-35	G	0.9763	0.7624	0.1149	3.305e-11
19:40833470_A_G	rs16974196	27798624	19	40833470	A	G	0.32	0.2436	0.0359	1.105e-11	1	1	1	A	0.3143	0.1731	0.02	4.433e-18	G	0.68506	-0.169166	0.0233362	4.4e-13	G	0.6869	-0.1804	0.0333	5.957e-08
19:45422160_C_G	rs12721051	27798624	19	45422160	G	C	0.18	-0.2874	0.0438	5.226e-11	1	0	0	C	0.8173	0.1593	0.0239	2.874e-11	C	0.81512	0.14788	0.0277468	2e-08	G	0.1785	-0.1811	0.0405	7.933e-06
20:36840156_C_T	rs6123471	27798624	20	36840156	C	T	0.46	-0.5953	0.0332	6.633e-72	1	1	1	T	0.5389	0.5415	0.0181	5.92e-197	T	0.538293	0.596046	0.021612	5.9e-173	C	0.46	-0.4531	0.029	3.877e-55
20:39832628_C_T	rs17265513	27798624	20	39832628	C	T	0.19	0.2398	0.042	1.119e-08	1	0	0	T	0.8109	-0.172	0.0235	2.47e-13	T	0.80969	-0.198648	0.0275011	1.4e-12	C	0.187	0.1236	0.039	0.001524
22:28181399_C_T	rs2283847	27798624	22	28181399	T	C	0.45	-0.1741	0.0348	5.482e-07	1	0	0	T	0.55	-0.1867	0.0194	5.173e-22	C	0.452389	0.216807	0.022281	3.4e-22	C	0.4451	0.1265	0.0332	0.0001415
22:39150450_A_G	rs2076028	27798624	22	39150450	A	G	0.29	-0.2949	0.0364	5.451e-16	1	1	1	A	0.2937	-0.2541	0.0198	8.711e-38	G	0.706604	0.28252	0.0237232	4.7e-33	G	0.7058	0.2089	0.0315	3.526e-11
1:207940853_A_T	rs11118555	23583979	1	207940853	A	T	0.124	0.612	0.069	3.88e-26	1	1	1	A	0.1072	0.6093	0.0291	5.19e-97	T	0.897306	-0.606804	0.0353359	1.8e-67	T	0.8859	-0.613	0.0457	4.451e-41
2:179721046_A_G	rs17362588	23583979	2	179721046	A	G	0.114	0.736	0.077	3.57e-26	1	1	1	A	0.087	1.0084	0.0324	1.08e-212	G	0.914685	-1.04097	0.038294	1e-162	G	0.9102	-0.9525	0.0529	2.119e-72
2:188333064_A_G	rs4140885	23583979	2	188333064	A	G	0.317	0.217	0.049	4.72e-08	1	0	0	A	0.3069	0.224	0.0194	9.956e-31	G	0.700807	-0.245686	0.0234522	4.5e-26	G	0.6811	-0.1906	0.0307	5.648e-10
2:232271284_A_C	rs13030174	23583979	2	232271284	A	C	0.733	0.3	0.051	1.04e-10	1	1	1	A	0.7585	0.3111	0.0213	2.249e-48	A	0.762691	0.34529	0.0253078	7.8e-42	C	0.2485	-0.2541	0.0344	1.574e-13
3:171785168_C_G	rs9647379	23583979	3	171785168	C	G	0.4	0.206	0.047	1.17e-09	1	1	1	C	0.398	0.2477	0.0188	8.992e-40	G	0.598376	-0.254342	0.0220733	4.3e-32	G	0.6083	-0.2359	0.0309	2.128e-14
3:179172979_G_T	rs7612445	23583979	3	179172979	G	T	0.816	0.358	0.06	1.86e-14	1	1	1	T	0.1987	-0.3841	0.023	1.645e-62	G	0.806431	0.38046	0.0274655	2.1e-44	G	0.7929	0.3901	0.037	5.983e-26
5:172664163_A_G	rs6882776	23583979	5	172664163	G	A	0.68	0.301	0.051	2.29e-12	1	1	1	A	0.2958	-0.2815	0.0201	1.279e-44	G	0.711499	0.275708	0.0239108	9.4e-30	G	0.692	0.291	0.0324	2.719e-19
6:118667522_C_T	rs11153730	23583979	6	118667522	T	C	0.509	0.381	0.044	7.55e-21	1	1	1	T	0.518	0.4619	0.018	9.19e-145	T	0.516009	0.511513	0.0215005	6e-128	C	0.4788	-0.3806	0.029	1.982e-39
6:122131485_C_T	rs1015451	23583979	6	122131485	C	T	0.102	0.713	0.072	1.14e-32	1	1	1	T	0.8729	-0.9683	0.0287	4.82e-249	T	0.891231	-1.00855	0.0352217	2.3e-183	C	0.1532	0.911	0.0443	5.84e-94
7:93549596_A_T	rs180242	23583979	7	93549596	T	A	0.333	0.316	0.053	6.78e-12	1	1	1	A	0.6508	-0.3428	0.0189	9.531e-74	T	0.349151	0.346543	0.0225712	7.5e-54	T	0.3493	0.3367	0.0302	7.747e-29
7:100497131_A_G	rs13245899	23583979	7	100497131	G	A	0.195	0.447	0.055	7.67e-27	1	1	1	A	0.8083	-0.5897	0.0232	6.08e-142	A	0.809807	-0.630913	0.0273348	3.2e-119	G	0.1944	0.5167	0.0383	2.235e-41
7:136642634_C_T	rs2350782	23583979	7	136642634	C	T	0.116	0.505	0.078	1.26e-12	1	1	1	T	0.8787	-0.415	0.0285	3.893e-48	T	0.885996	-0.383089	0.0342777	6.7e-29	C	0.1326	0.4648	0.0451	6.176e-25
11:61571382_A_G	rs174549	23583979	11	61571382	A	G	0.31	0.358	0.047	1.38e-22	1	1	1	A	0.3023	0.3461	0.02	2.049e-67	G	0.698419	-0.328644	0.0235307	6.7e-46	G	0.6964	-0.3765	0.0327	9.836e-31
12:24770878_A_G	rs17287293	23583979	12	24770878	A	G	0.85	0.444	0.062	3.07e-20	1	1	1	A	0.8491	0.653	0.0252	1.08e-147	A	0.849382	0.70448	0.0299949	3.1e-125	G	0.1514	-0.5673	0.0408	7.486e-44
12:33576990_A_C	rs7980799	23583979	12	33576990	A	C	0.401	0.377	0.046	6.22e-24	1	1	1	A	0.4017	0.4287	0.0186	1.65e-117	A	0.410515	0.43057	0.0221099	7.5e-88	C	0.6129	-0.4257	0.0301	2.218e-45
12:39106731_C_T	rs826838	23583979	12	39106731	C	T	0.443	0.234	0.045	3.73e-09	1	1	1	T	0.5488	-0.1872	0.0182	7.719e-25	C	0.456162	0.205323	0.0216391	5.3e-22	C	0.443	0.1572	0.0294	8.986e-08
12:107149422_A_T	rs2067615	23583979	12	107149422	A	T	0.49	0.278	0.044	1.58e-09	1	1	1	A	0.4755	0.1479	0.018	2.219e-16	A	0.47466	0.133435	0.0216172	7e-10	T	0.5231	-0.1709	0.0287	2.758e-09
14:23861811_A_G	rs365990	23583979	14	23861811	G	A	0.353	0.564	0.047	5.39e-45	1	1	1	A	0.624	-0.7247	0.0189	5.33e-322	A	0.626453	-0.780816	0.0222626	9e-273	G	0.3803	0.6267	0.031	7.81e-91
14:85809911_C_T	rs17796783	23583979	14	85809911	T	C	0.716	0.334	0.049	2.69e-13	1	1	1	T	0.7192	0.429	0.0204	6.99e-98	T	0.719158	0.448494	0.0240493	3e-80	C	0.2806	-0.3947	0.0336	7.345e-32
15:73665506_G_T	rs4489968	23583979	15	73665506	T	G	0.843	0.513	0.06	3.82e-20	1	1	1	T	0.8381	0.4767	0.0244	3.87e-85	T	0.841299	0.512982	0.0294593	2.2e-69	G	0.1669	-0.4211	0.0384	5.348e-28
20:36844038_C_T	rs6127471	23583979	20	36844038	C	T	0.54	0.429	0.045	5.22e-29	1	1	1	T	0.4611	-0.5429	0.018	2.6e-200	C	0.537663	0.596181	0.021634	1.5e-172	C	0.5408	0.4595	0.0285	1.957e-58

## Sheet: SD4
Supplementary Data 4: Chow-test for all genome-wide significant RHR associated SNPs to assess differences of effect estimates between participants taking RHR-altering medication or with a history of any cardiovascular disease versus those who did not. A total of 495 SNPs was tested, including the 492 SNPs present in UK Biobank, and three proxies additionaly. This analyses indicate that beta estim…
			Medication usage & history of heart disease
			Yes					No					Difference
MarkerName	SNP	proxy	Beta	se	Z-value	P-value	N	Beta	se	Z-value	P-value	N	chi2	P Chow-test	P Chow test corrected for multiple testing
1:10099661_C_T	rs184840810	0	1.62932	0.383774	4.24552	2.18086e-05	155097	0.858946	0.23035	3.72887	0.000192343	329210	2.95827	0.0854394	42.2925
1:10357806_C_G	rs112682076	0	0.962593	0.223708	4.30291	1.68573e-05	155097	1.06238	0.127386	8.33988	7.43647e-17	329210	0.151006	0.697576	345.3
1:10731307_A_AAG	rs149872714	0	0.506951	0.114842	4.41433	1.01324e-05	155097	0.495238	0.066866	7.40642	1.29752e-13	329210	0.00779998	0.929624	460.164
1:110136884_C_T	rs41280328	0	-0.354661	0.138934	-2.55273	0.0106881	155097	-0.424563	0.0817473	-5.19361	2.06258e-07	329210	0.188336	0.664305	328.831
1:112133445_C_T	rs72695256	0	-0.20141	0.0576451	-3.49396	0.000475912	155097	-0.130808	0.0336417	-3.88829	0.000100954	329210	1.12267	0.289344	143.225
1:150635774_C_T	rs6587517	0	-0.185925	0.0780164	-2.38315	0.017165	155097	-0.199202	0.0448433	-4.44219	8.90482e-06	329210	0.0218142	0.882582	436.878
1:156468243_A_T	rs10908505	0	0.198227	0.0459306	4.31579	1.5903e-05	155097	0.132401	0.0268814	4.92536	8.42044e-07	329210	1.53412	0.215496	106.67
1:173868955_C_T	rs6691053	0	-0.186166	0.0527878	-3.52668	0.0004208	155097	-0.146228	0.030726	-4.75908	1.94478e-06	329210	0.429838	0.512068	253.474
1:183399613_A_G	rs1338373	0	0.136968	0.0440808	3.1072	0.00188866	155097	0.129375	0.0255837	5.05691	4.261e-07	329210	0.0223351	0.881199	436.194
1:197823154_A_C	rs10801626	0	0.129838	0.047443	2.73671	0.00620569	155097	0.0718665	0.0278951	2.57632	0.00998594	329210	1.11331	0.291364	144.225
1:205075641_A_G	rs10900448	0	0.183503	0.0447025	4.10499	4.04331e-05	155097	0.146121	0.0260762	5.60363	2.09905e-08	329210	0.523531	0.469339	232.323
1:205767885_A_G	rs708727	0	-0.119989	0.04474	-2.68193	0.00731989	155097	-0.10332	0.0261571	-3.94998	7.81569e-05	329210	0.103842	0.747267	369.897
1:206670653_C_G	rs11576885	0	0.0599204	0.0449649	1.3326	0.182662	155097	0.103186	0.0263983	3.9088	9.27559e-05	329210	0.692048	0.405469	200.707
1:207889838_A_AT	rs148324780	0	-0.0799373	0.0882953	-0.905341	0.365285	155097	-0.334478	0.0513779	-6.51016	7.50708e-11	329210	6.22124	0.0126226	6.24821
1:207993102_A_G	rs7512286	0	0.473185	0.0727309	6.50597	7.71915e-11	155097	0.686458	0.0425714	16.1249	1.70625e-58	329210	6.40063	0.011408	5.64697
1:208040605_A_T	rs672588	0	-0.234069	0.0693809	-3.37369	0.000741689	155097	-0.208491	0.0412694	-5.05194	4.37341e-07	329210	0.100916	0.750733	371.613
1:208121860_C_T	rs11582914	0	-0.196532	0.0998775	-1.96773	0.0490996	155097	-0.269877	0.0574617	-4.69665	2.64464e-06	329210	0.405198	0.524417	259.586
1:212050065_A_AT	rs10707051	0	0.159864	0.0439129	3.64047	0.000272144	155097	0.108101	0.0256287	4.21796	2.46527e-05	329210	1.03672	0.308585	152.749
1:212215907_A_ATAT	rs146642277	0	-0.270227	0.114041	-2.36955	0.0178097	155097	-0.269438	0.0663204	-4.06267	4.85145e-05	329210	3.586e-05	0.995222	492.635
1:216734001_A_T	rs17042848	0	-0.242658	0.0562501	-4.31391	1.60394e-05	155097	-0.253651	0.0329931	-7.68801	1.49437e-14	329210	0.0285047	0.865928	428.634
1:217739036_C_T	rs2042525	0	0.264857	0.0518272	5.11039	3.21501e-07	155097	0.178473	0.029939	5.96121	2.50375e-09	329210	2.09096	0.148173	73.3454
1:218201463_A_G	rs17693328	0	0.151326	0.0512161	2.95466	0.00313018	155097	0.0974702	0.0298468	3.26568	0.00109201	329210	0.828258	0.362777	179.574
1:222823743_G_T	rs67180937	0	-0.164955	0.0505822	-3.26113	0.00110968	155097	-0.128595	0.029441	-4.36788	1.25457e-05	329210	0.386966	0.533899	264.28
1:227217905_C_T	rs12403775	0	0.188466	0.0493943	3.81553	0.00013589	155097	0.104988	0.0287407	3.65294	0.000259252	329210	2.14339	0.143185	70.8765
1:237715400_A_G	rs111660369	0	-0.558238	0.143981	-3.87716	0.000105685	155097	-0.523191	0.0839309	-6.23359	4.55853e-10	329210	0.0444704	0.832981	412.326
1:237923053_C_T	rs2253831	0	-0.190496	0.0475593	-4.00545	6.19e-05	155097	-0.153462	0.0276957	-5.54102	3.00711e-08	329210	0.454432	0.500238	247.618
1:26383875_A_G	rs2275947	0	-0.18773	0.0528894	-3.54948	0.000385999	155097	-0.169722	0.0308198	-5.50692	3.65157e-08	329210	0.0868942	0.768163	380.241
1:28688097_A_G	rs111273182	0	0.171528	0.0470529	3.64542	0.000266959	155097	0.161734	0.0276406	5.85132	4.87678e-09	329210	0.0323553	0.85725	424.339
1:39944249_C_T	rs61779313	0	0.0971715	0.0519916	1.86898	0.0616249	155097	0.137434	0.0303384	4.53004	5.89726e-06	329210	0.448696	0.502955	248.963
1:40481100_A_G	rs11207310	0	0.136047	0.0453499	2.99993	0.00270042	155097	0.127619	0.0264559	4.82383	1.40831e-06	329210	0.025874	0.872208	431.743
1:43426591_C_T	rs3738514	0	-0.0745748	0.0532495	-1.40048	0.16137	155097	-0.227555	0.0310031	-7.33976	2.13985e-13	329210	6.17834	0.0129324	6.40151
1:45012273_A_C	rs272564	0	0.39002	0.0491852	7.92963	2.19795e-15	155097	0.427274	0.028521	14.981	9.77127e-51	329210	0.429822	0.512076	253.478
1:45770167_C_G	rs11576668	0	0.366458	0.0760641	4.81776	1.45181e-06	155097	0.273228	0.0447122	6.11083	9.91147e-10	329210	1.12011	0.289896	143.498
1:46658217_C_T	rs41292143	0	-0.690408	0.157118	-4.39421	1.11175e-05	155097	-0.450761	0.0906494	-4.97258	6.60683e-07	329210	1.74806	0.18612	92.1295
1:51241057_A_C	rs17384696	0	0.208871	0.0465848	4.48367	7.33685e-06	155097	0.129799	0.027355	4.74497	2.08537e-06	329210	2.15114	0.142464	70.5198
1:54119578_A_G	rs17387330	0	0.154423	0.0470371	3.283	0.00102708	155097	0.135687	0.0275356	4.92771	8.31996e-07	329210	0.118679	0.730472	361.584
1:54765727_C_T	rs10888844	0	-0.171422	0.0471494	-3.63571	0.000277218	155097	-0.1855	0.0273613	-6.77964	1.20472e-11	329210	0.0669004	0.795904	393.973
1:54953955_C_T	rs177264	0	0.111254	0.0694676	1.60152	0.109261	155097	0.286943	0.0401174	7.15259	8.51544e-13	329210	4.80435	0.028388	14.052
1:56846395_A_C	rs12564524	0	-0.121615	0.0438079	-2.7761	0.00550151	155097	-0.0974144	0.0255838	-3.80766	0.000140287	329210	0.228408	0.632707	313.19
1:6272137_A_G	rs709208	0	0.181156	0.0474927	3.81439	0.000136519	155097	0.258857	0.0277869	9.3158	1.21036e-20	329210	2.00749	0.156524	77.4795
1:6565218_C_T	rs4590694	0	0.194721	0.0590358	3.29835	0.000972548	155097	0.118363	0.0344883	3.43198	0.000599201	329210	1.24974	0.263603	130.483
1:66988401_C_T	rs12093875	0	-0.394302	0.0530655	-7.43048	1.08207e-13	155097	-0.297454	0.030888	-9.63007	5.96873e-22	329210	2.49607	0.114131	56.4946
1:68331048_A_G	rs7544103	0	-0.114088	0.0461525	-2.47197	0.013437	155097	-0.0999606	0.0269904	-3.70357	0.000212589	329210	0.0699721	0.791377	391.732
1:72674434_G_T	rs1858601	0	-0.146198	0.0546999	-2.67273	0.00752365	155097	-0.117558	0.031722	-3.70588	0.000210658	329210	0.206016	0.649908	321.704
1:80452798_G_T	rs1340678	0	0.331314	0.0562035	5.8949	3.74909e-09	155097	0.186164	0.0325709	5.71565	1.09283e-08	329210	5.00409	0.0252875	12.5173
1:80460168_C_T	rs12085038	0	0.204845	0.049267	4.15786	3.2125e-05	155097	0.112136	0.0286533	3.91353	9.09551e-05	329210	2.65954	0.10293	50.9505
1:83891090_A_C	rs3855035	0	-0.0555995	0.0434641	-1.2792	0.200825	155097	-0.116678	0.0253789	-4.59743	4.27727e-06	329210	1.47583	0.224428	111.092
1:87893268_A_G	rs10782600	0	-0.24508	0.0450061	-5.44548	5.16648e-08	155097	-0.253942	0.0262087	-9.68922	3.35091e-22	329210	0.0290335	0.864702	428.027
1:88029611_A_G	rs61773083	0	-0.168763	0.0503385	-3.35255	0.000800698	155097	-0.204159	0.0294351	-6.93591	4.03622e-12	329210	0.369475	0.54329	268.929
1:88405184_A_C	rs1155338	0	-0.234762	0.0597564	-3.92866	8.54219e-05	155097	-0.208773	0.0348258	-5.99477	2.03774e-09	329210	0.141948	0.706352	349.644
1:94055890_C_G	rs236321	0	-0.148491	0.0509066	-2.91693	0.00353501	155097	-0.162422	0.0296315	-5.4814	4.21983e-08	329210	0.0561463	0.812694	402.284
1:95511347_G_T	rs61774262	0	0.130472	0.0443145	2.94424	0.00323753	155097	0.0828494	0.0259134	3.19717	0.00138784	329210	0.864565	0.352464	174.47
10:10059819_C_T	rs12763433	0	0.142098	0.043918	3.23552	0.0012142	155097	0.106107	0.0256366	4.13886	3.49034e-05	329210	0.502665	0.478331	236.774
10:101529815_C_CT	rs146441853	0	0.164237	0.0442924	3.70801	0.000208892	155097	0.175611	0.0258127	6.80327	1.0227e-11	329210	0.0494309	0.824056	407.908
10:102317565_C_CTA	rs201325761	0	-0.157571	0.0534756	-2.94659	0.00321296	155097	-0.12596	0.0314306	-4.00757	6.13469e-05	329210	0.260641	0.60968	301.792
10:102552663_A_G	rs11190709	0	0.278312	0.0704063	3.95294	7.71963e-05	155097	0.286234	0.0408178	7.01247	2.34145e-12	329210	0.00955834	0.922118	456.448
10:104957629_A_T	rs12414028	0	-0.0720794	0.0821706	-0.877193	0.380382	155097	-0.298238	0.046184	-6.4576	1.06374e-10	329210	5.77782	0.0162297	8.0337
10:105615462_C_CG	rs76220958	0	-0.076022	0.0454173	-1.67386	0.0941589	155097	-0.193697	0.0265023	-7.30868	2.69786e-13	329210	5.03662	0.0248169	12.2844
10:112459906_A_G	rs10787270	0	0.119224	0.0444896	2.67981	0.00736629	155097	0.185986	0.0259127	7.17742	7.10385e-13	329210	1.68819	0.193839	95.9504
10:112576559_C_G	rs12573386	0	-0.176881	0.0452941	-3.90517	9.41596e-05	155097	-0.126637	0.0264414	-4.78934	1.67331e-06	329210	0.922041	0.33694	166.785
10:115438204_A_C	rs12415607	0	0.209541	0.0520031	4.0294	5.59198e-05	155097	0.127396	0.0304092	4.1894	2.79696e-05	329210	1.87247	0.171192	84.7402
10:115780121_C_T	rs2782978	0	0.105331	0.0449124	2.34525	0.0190144	155097	0.10899	0.0262988	4.14428	3.40883e-05	329210	0.00495545	0.943879	467.22
10:121429633_C_T	rs2234962	0	-0.150927	0.0534563	-2.82337	0.0047522	155097	-0.178133	0.0309981	-5.74658	9.10659e-09	329210	0.194839	0.658919	326.165
10:123025225_A_G	rs7915008	0	0.179401	0.0506217	3.54395	0.000394176	155097	0.128027	0.0295315	4.33525	1.45592e-05	329210	0.773453	0.379151	187.68
10:18641481_A_C	rs77141557	0	-0.220374	0.0662028	-3.32878	0.000872282	155097	-0.215542	0.038596	-5.58457	2.34283e-08	329210	0.00398529	0.949664	470.084
10:29265018_A_T	rs788045	0	0.165954	0.051518	3.22129	0.00127615	155097	0.171885	0.0300722	5.71575	1.0922e-08	329210	0.00989619	0.920757	455.775
10:29820758_C_T	rs17695155	0	0.257168	0.0444548	5.78494	7.25363e-09	155097	0.226514	0.0260527	8.69446	3.4848e-18	329210	0.3557	0.550904	272.697
10:30166035_A_C	rs7078837	0	-0.123675	0.044119	-2.80322	0.00505946	155097	-0.160694	0.0258427	-6.21816	5.03005e-10	329210	0.525701	0.46842	231.868
10:43465694_A_C	rs61845266	0	0.167304	0.0826353	2.02461	0.0429079	155097	0.321638	0.0486441	6.61205	3.79028e-11	329210	2.61425	0.105907	52.4242
10:50507975_A_C	rs35326339	0	0.0719019	0.0437097	1.64499	0.0999727	155097	0.156905	0.0255681	6.13677	8.4215e-10	329210	2.82563	0.0927705	45.9214
10:63205765_G_GA	rs143216658	0	0.268998	0.0576729	4.66421	3.09803e-06	155097	0.233658	0.034052	6.8618	6.79964e-12	329210	0.279215	0.597216	295.622
10:69868675_A_G	rs10823138	0	-0.216368	0.0796395	-2.71684	0.00659075	155097	-0.149382	0.0461627	-3.23599	0.00121221	329210	0.532687	0.465479	230.412
10:69964003_C_G	rs143348765	0	0.945631	0.258556	3.65736	0.000254831	155097	0.709354	0.151817	4.67244	2.97643e-06	329210	0.623347	0.429806	212.754
10:70363393_C_T	rs1954278	0	0.115198	0.0445987	2.58299	0.00979472	155097	0.164052	0.0260077	6.30783	2.82977e-10	329210	0.89955	0.342902	169.737
10:75420114_A_C	rs6480708	0	-0.187719	0.0600222	-3.12749	0.00176306	155097	-0.181242	0.0352316	-5.14429	2.68534e-07	329210	0.00869593	0.925703	458.223
10:92715993_A_ATG	rs368764143	0	-0.137158	0.0439616	-3.11994	0.00180889	155097	-0.129786	0.0257181	-5.04649	4.49995e-07	329210	0.0209657	0.884872	438.012
10:94056095_C_T	rs11186904	0	0.0502688	0.044359	1.13323	0.25712	155097	0.123145	0.0260968	4.71879	2.37254e-06	329210	2.01339	0.155917	77.1787
11:102054822_A_AAAAAG	rs200525553	0	0.197766	0.0470217	4.20584	2.60111e-05	155097	0.158596	0.0273365	5.80161	6.5683e-09	329210	0.521403	0.470244	232.771
11:111743232_C_T	rs7112886	0	-0.176008	0.047814	-3.6811	0.000232229	155097	-0.131466	0.0280361	-4.68917	2.74312e-06	329210	0.64902	0.420463	208.129
11:112646162_A_G	rs72995788	0	-0.18372	0.054389	-3.37789	0.000730454	155097	-0.145143	0.0318621	-4.55536	5.22957e-06	329210	0.375674	0.539927	267.264
11:12223034_C_T	rs74964634	0	0.267922	0.0889836	3.01092	0.00260458	155097	0.291492	0.0516357	5.64517	1.6502e-08	329210	0.0524332	0.818882	405.347
11:123022720_C_T	rs34809680	0	-0.230465	0.0526349	-4.37855	1.19469e-05	155097	-0.137481	0.0309526	-4.44165	8.9272e-06	329210	2.32799	0.127066	62.8976
11:123047826_C_G	rs7928609	0	-0.103843	0.0438853	-2.36623	0.0179702	155097	-0.123984	0.0256478	-4.83408	1.33761e-06	329210	0.157614	0.691363	342.225
11:128764570_A_G	rs76097649	0	-0.434809	0.0764794	-5.6853	1.30581e-08	155097	-0.463394	0.0443979	-10.4373	1.6752e-25	329210	0.104822	0.746118	369.328
11:128782012_C_G	rs7102584	0	-0.528731	0.167862	-3.1498	0.00163383	155097	-0.82339	0.0980523	-8.39746	4.5624e-17	329210	2.30552	0.128915	63.813
11:14048480_C_T	rs10832164	0	-0.114299	0.0437104	-2.61491	0.00892499	155097	-0.199462	0.0254091	-7.85005	4.15877e-15	329210	2.84305	0.0917697	45.426
11:2197112_A_G	rs7482891	0	-0.137962	0.0451605	-3.05494	0.00225109	155097	-0.101197	0.0263314	-3.84319	0.000121443	329210	0.496961	0.480839	238.015
11:30568643_A_G	rs509240	0	-0.161219	0.0463013	-3.48196	0.000497763	155097	-0.153146	0.0270052	-5.67096	1.41997e-08	329210	0.0227796	0.880032	435.616
11:32367735_A_G	rs11031734	0	-0.223407	0.0517095	-4.32043	1.55726e-05	155097	-0.18575	0.0301425	-6.1624	7.16528e-10	329210	0.396233	0.529041	261.875
11:43787674_C_T	rs114693078	0	0.214405	0.0624214	3.4348	0.000592992	155097	0.230991	0.0365985	6.31148	2.76375e-10	329210	0.0527155	0.818404	405.11
11:44975552_C_T	rs34206025	0	0.147967	0.0466936	3.16889	0.00153022	155097	0.281422	0.0270614	10.3994	2.49541e-25	329210	6.13938	0.0132203	6.54407
11:61586328_C_CT	rs35473591	0	0.328752	0.0462921	7.10169	1.23241e-12	155097	0.345271	0.0271322	12.7255	4.26688e-37	329210	0.0951547	0.757724	375.073
11:62336776_A_G	rs7928833	0	-0.160771	0.0453073	-3.54845	0.0003875	155097	-0.116535	0.0264086	-4.41277	1.02057e-05	329210	0.714282	0.398026	197.023
11:65337251_A_T	rs1346	0	-0.222936	0.0547641	-4.07084	4.68449e-05	155097	-0.237708	0.0319729	-7.43467	1.04827e-13	329210	0.0543296	0.815694	403.768
11:76131866_C_G	rs7930925	0	-0.170197	0.0467506	-3.64054	0.00027207	155097	-0.0877936	0.0273211	-3.2134	0.00131172	329210	2.32293	0.127479	63.1023
11:78191740_T_TG	rs11347548	0	0.267536	0.05684	4.70683	2.516e-06	155097	0.163919	0.0327923	4.99871	5.77142e-07	329210	2.49867	0.113942	56.4014
11:89224718_G_T	rs2289123	0	-0.162772	0.0527075	-3.08821	0.00201365	155097	-0.1742	0.0307162	-5.67128	1.41732e-08	329210	0.0352194	0.851137	421.313
11:92708710_C_G	rs10830963	0	0.0808256	0.0486586	1.66108	0.0966983	155097	0.115974	0.0283907	4.08493	4.40895e-05	329210	0.39091	0.531822	263.252
11:9388001_A_AC	rs113086523	0	-0.0652879	0.0442871	-1.4742	0.140428	155097	-0.13125	0.0256838	-5.11023	3.21759e-07	329210	1.6695	0.196325	97.1808
11:96075065_C_T	rs117686537	0	-0.447372	0.142503	-3.13938	0.00169306	155097	-0.285181	0.0834715	-3.41651	0.000634303	329210	0.966711	0.325502	161.123
12:102599859_A_G	rs10507145	0	-0.092054	0.0571764	-1.61	0.107398	155097	-0.152431	0.033277	-4.58066	4.63502e-06	329210	0.836549	0.360386	178.391
12:107149422_A_T	rs2067615	0	-0.146782	0.0439983	-3.33608	0.000849687	155097	-0.132196	0.0255595	-5.17208	2.31508e-07	329210	0.0824466	0.774009	383.134
12:110705800_A_G	rs1986123	0	-0.211987	0.0452811	-4.68156	2.84694e-06	155097	-0.201268	0.0264873	-7.59866	2.99217e-14	329210	0.0418666	0.837874	414.748
12:114837349_A_C	rs77357563	0	1.94895	0.333241	5.84847	4.96111e-09	155097	2.53139	0.19167	13.207	7.9907e-40	329210	2.3034	0.129091	63.8999
12:114869757_G_T	rs2077196	0	0.195	0.0443659	4.39526	1.10641e-05	155097	0.137478	0.0258207	5.32435	1.01314e-07	329210	1.26168	0.261333	129.36
12:116231689_A_G	rs2681469	0	-0.209425	0.0436167	-4.80149	1.5749e-06	155097	-0.145373	0.0254681	-5.70803	1.14291e-08	329210	1.61444	0.203868	100.915
12:123077485_A_T	rs10744287	0	0.146242	0.0449215	3.2555	0.00113193	155097	0.138929	0.0263072	5.281	1.28479e-07	329210	0.01976	0.888209	439.664
12:123885930_C_T	rs370591186	0	0.3487	0.137547	2.53513	0.0112407	155097	0.453936	0.0807735	5.61987	1.91104e-08	329210	0.436246	0.50894	251.925
12:20000865_A_G	rs79863363	0	0.739568	0.20796	3.55629	0.000376129	155097	0.586257	0.122196	4.79766	1.60528e-06	329210	0.402889	0.525601	260.172
12:20470009_A_G	rs2044315	0	-0.201491	0.0509788	-3.95245	7.73553e-05	155097	-0.315679	0.0295829	-10.671	1.39136e-26	329210	3.76409	0.0523645	25.9204
12:2178165_A_G	rs11062103	0	-0.464159	0.0567687	-8.17632	2.92647e-16	155097	-0.516467	0.0333319	-15.4947	3.7675e-54	329210	0.63372	0.425994	210.867
12:24739636_A_T	rs12230165	0	0.35254	0.165374	2.13177	0.0330259	155097	0.410543	0.0954765	4.29993	1.70849e-05	329210	0.0921874	0.761415	376.9
12:24758480_A_G	rs4963772	0	-0.773755	0.0614892	-12.5836	2.59971e-36	155097	-0.694903	0.0358223	-19.3986	7.92858e-84	329210	1.2314	0.267135	132.232
12:26348304_C_T	rs58747679	0	0.227809	0.0479301	4.75294	2.00477e-06	155097	0.212338	0.0279971	7.58429	3.34302e-14	329210	0.0780773	0.77992	386.06
12:27957292_C_CTCT	rs150733182	0	-0.257875	0.0585571	-4.40383	1.06358e-05	155097	-0.210682	0.0340524	-6.187	6.13202e-10	329210	0.487878	0.484876	240.013
12:33232889_C_T	NA	1	0.810271	0.505715	1.60223	0.109105	155097	0.489867	0.33072	1.48121	0.13855	329210	0.283161	0.594637	294.345
12:33303342_C_T	rs4931690	0	-0.140515	0.0488612	-2.8758	0.0040301	155097	-0.170018	0.0284239	-5.98151	2.21084e-09	329210	0.273679	0.600875	297.433
12:33512682_C_G	rs150799186	0	-0.642923	0.267544	-2.40306	0.0162586	155097	-0.954363	0.153484	-6.218	5.03543e-10	329210	1.01803	0.312986	154.928
12:33593127_C_T	rs6488162	0	-0.408135	0.0445045	-9.17064	4.70216e-20	155097	-0.468874	0.0260349	-18.0095	1.64239e-72	329210	1.39304	0.237893	117.757
12:34029877_G_T	NA	1	0.254416	0.0446351	5.69991	1.19869e-08	155097	0.296447	0.0261603	11.3319	9.11687e-30	329210	0.662548	0.415662	205.753
12:34059037_C_CT	rs536829226;rs35580577	0	0.24498	0.0447521	5.47415	4.3961e-08	155097	0.296964	0.0262637	11.307	1.21154e-29	329210	1.00726	0.315559	156.202
12:34314468_A_ATG	rs75894858	0	-0.297535	0.0664317	-4.47882	7.50584e-06	155097	-0.225831	0.0389227	-5.80202	6.5519e-09	329210	0.870943	0.350694	173.594
12:38653362_C_T	rs1906263	0	0.220569	0.0443355	4.97501	6.52441e-07	155097	0.237088	0.0258678	9.16536	4.93822e-20	329210	0.103918	0.747178	369.853
12:39425167_C_T	rs113967051	0	-0.209032	0.105825	-1.97526	0.0482385	155097	-0.335752	0.0609807	-5.50587	3.6735e-08	329210	1.08088	0.2985	147.758
12:49519185_A_G	rs7976890	0	-0.134997	0.0456616	-2.95648	0.00311176	155097	-0.115488	0.0267521	-4.31698	1.58182e-05	329210	0.136383	0.711904	352.393
12:52317057_C_G	rs2293093	0	-0.200841	0.0689821	-2.91149	0.00359707	155097	-0.158341	0.0400041	-3.95811	7.55447e-05	329210	0.284515	0.593757	293.91
12:56025054_G_T	rs3858540	0	0.134778	0.0439909	3.06377	0.00218564	155097	0.112487	0.0258198	4.35661	1.32094e-05	329210	0.191656	0.661542	327.463
12:57114100_A_G	rs2926743	0	-0.125256	0.048847	-2.56426	0.0103395	155097	-0.124122	0.0284487	-4.36299	1.28297e-05	329210	0.00040483	0.983947	487.054
12:64971147_A_G	rs1628543	0	0.248085	0.0439775	5.64119	1.68883e-08	155097	0.269593	0.0257704	10.4613	1.30023e-25	329210	0.17862	0.672562	332.918
12:66373602_C_T	rs142095082	0	0.12355	0.0439072	2.81389	0.00489459	155097	0.147889	0.0257554	5.74208	9.35222e-09	329210	0.229259	0.632074	312.877
12:66422753_C_T	rs10784510	0	-0.0412708	0.0472919	-0.872681	0.382837	155097	-0.116785	0.0274287	-4.25775	2.06499e-05	329210	1.9121	0.166731	82.5317
12:82117216_A_C	rs10778828	0	-0.283158	0.0510807	-5.54335	2.96734e-08	155097	-0.186211	0.0300186	-6.2032	5.53267e-10	329210	2.68017	0.101605	50.2944
12:93709539_A_G	rs1135400	0	0.0328782	0.0442577	0.742881	0.457554	155097	0.111341	0.0260499	4.27413	1.91888e-05	329210	2.34261	0.125879	62.31
13:111035483_A_G	rs2391825	0	-0.169662	0.0487339	-3.48139	0.000498822	155097	-0.111051	0.0283302	-3.91987	8.8597e-05	329210	1.08535	0.297503	147.264
13:28131503_C_T	rs2386688	0	0.112647	0.043687	2.5785	0.00992316	155097	0.161133	0.0255629	6.30341	2.91165e-10	329210	0.920217	0.337418	167.022
13:41248026_C_T	rs9549258	0	0.105488	0.0545555	1.93359	0.0531634	155097	0.16968	0.032135	5.28021	1.29033e-07	329210	1.03199	0.309693	153.298
13:69048878_A_T	rs75531212	0	-0.100306	0.0437201	-2.29428	0.0217742	155097	-0.182225	0.0254364	-7.16395	7.83845e-13	329210	2.62892	0.104933	51.9418
13:73730549_C_T	rs7983621	0	-0.0998177	0.043701	-2.28411	0.0223652	155097	-0.167607	0.0255443	-6.56143	5.32937e-11	329210	1.79982	0.179735	88.9686
13:98859019_A_T	rs9554446	0	-0.210875	0.0727052	-2.90042	0.00372668	155097	-0.215555	0.0423812	-5.08609	3.6552e-07	329210	0.00309492	0.955635	473.039
14:102614961_G_T	rs1190579	0	-0.197004	0.0772643	-2.54975	0.0107802	155097	-0.22809	0.0455597	-5.00641	5.54541e-07	329210	0.120436	0.728563	360.638
14:21542740_A_G	rs45519335	0	0.990392	0.298161	3.32167	0.000894812	155097	1.07924	0.178583	6.04335	1.50947e-09	329210	0.0653656	0.798208	395.113
14:21542766_A_G	rs12889267	0	0.569402	0.0588832	9.67002	4.04304e-22	155097	0.461408	0.0342962	13.4536	2.93266e-41	329210	2.5198	0.112425	55.6502
14:21555087_A_AAATC	rs145744937	0	-0.235884	0.0463784	-5.08608	3.65539e-07	155097	-0.191713	0.0270312	-7.09228	1.31921e-12	329210	0.678573	0.410079	202.989
14:23793519_C_T	rs200285827	0	0.94172	0.206052	4.57031	4.87015e-06	155097	0.598855	0.125583	4.76859	1.8552e-06	329210	2.0231	0.154923	76.6869
14:23858697_C_G	rs34935550	0	-1.72748	0.385014	-4.48679	7.23052e-06	155097	-1.8842	0.213359	-8.83112	1.0363e-18	329210	0.126711	0.721867	357.324
14:23865885_A_G	rs452036	0	0.763735	0.0454107	16.8184	1.78932e-63	155097	0.800089	0.0263656	30.346	2.84042e-202	329210	0.480379	0.48825	241.684
14:23882896_C_T	rs45553533	0	-0.54446	0.193726	-2.81047	0.00494695	155097	-0.832758	0.114891	-7.24827	4.2213e-13	329210	1.63934	0.200416	99.2061
14:23907608_C_G	rs875908	0	-0.266303	0.0453657	-5.87014	4.3543e-09	155097	-0.193221	0.0263962	-7.32001	2.47953e-13	329210	1.94299	0.163345	80.8556
14:24899473_C_G	rs10146358	0	0.270479	0.0798084	3.38911	0.000701202	155097	0.308543	0.0463384	6.65847	2.76687e-11	329210	0.171189	0.679057	336.133
14:31835779_G_T	rs7149240	0	-0.16888	0.0440251	-3.83599	0.000125062	155097	-0.132135	0.0255995	-5.16163	2.44812e-07	329210	0.523604	0.469308	232.308
14:52521436_A_G	rs1540702	0	-0.147409	0.0513747	-2.86929	0.0041139	155097	-0.2161	0.0298409	-7.24174	4.42962e-13	329210	1.34348	0.246422	121.979
14:55481919_A_G	rs28693954	0	-0.12805	0.0465911	-2.74837	0.00598917	155097	-0.1484	0.0273282	-5.43028	5.62662e-08	329210	0.142097	0.706205	349.571
14:64408135_A_C	rs2184292	0	-0.0548948	0.0475039	-1.15558	0.247851	155097	-0.16573	0.0277272	-5.97718	2.27037e-09	329210	4.0797	0.0434014	21.4837
14:67980031_A_G	rs12878981	0	-0.10888	0.0433455	-2.51192	0.0120078	155097	-0.123011	0.0254816	-4.82744	1.383e-06	329210	0.0793067	0.778239	385.228
14:72393177_G_T	rs11846754	0	-0.248585	0.0981622	-2.53239	0.0113288	155097	-0.22866	0.0579073	-3.94873	7.85665e-05	329210	0.0306693	0.86098	426.185
14:72846021_A_G	rs10137579	0	0.14957	0.045129	3.31428	0.000918786	155097	0.274174	0.026308	10.4217	1.9737e-25	329210	5.69108	0.0170513	8.4404
14:72885471_C_G	rs17180489	0	-0.496162	0.0629817	-7.87787	3.33007e-15	155097	-0.615111	0.0363509	-16.9215	3.12532e-64	329210	2.66808	0.102379	50.6779
14:78296468_C_T	rs10149767	0	0.25	0.0611276	4.0898	4.31746e-05	155097	0.188884	0.035653	5.29783	1.17186e-07	329210	0.746853	0.387474	191.8
14:85811614_A_G	rs12886126	0	-0.55533	0.0484371	-11.465	1.97818e-30	155097	-0.402119	0.0282831	-14.2176	7.12132e-46	329210	7.49214	0.00619689	3.06746
14:91589787_A_G	rs6575178	0	0.224109	0.0523023	4.28488	1.82835e-05	155097	0.208322	0.0302983	6.8757	6.16872e-12	329210	0.0683379	0.793772	392.917
14:92550658_A_G	rs8014854	0	0.122185	0.0457981	2.6679	0.00763272	155097	0.104023	0.0266328	3.90582	9.3908e-05	329210	0.118793	0.730348	361.522
14:94363887_C_T	rs72698224	0	0.261318	0.0819863	3.18734	0.00143588	155097	0.183039	0.0480527	3.80913	0.000139459	329210	0.679665	0.409702	202.803
15:43983307_A_G	rs62018939	0	0.196105	0.0590743	3.31964	0.000901346	155097	0.120885	0.0344974	3.50417	0.000458039	329210	1.21228	0.270881	134.086
15:63359564_A_C	rs4619348	0	0.151407	0.0438453	3.45321	0.000553954	155097	0.148904	0.0255056	5.83811	5.27975e-09	329210	0.0024415	0.960591	475.493
15:63987583_A_T	rs79976004	0	0.27482	0.0558074	4.92443	8.46075e-07	155097	0.154604	0.032834	4.70865	2.49364e-06	329210	3.44437	0.0634676	31.4165
15:69068176_G_T	rs11072053	0	0.162092	0.0580967	2.79004	0.00527009	155097	0.191827	0.0340352	5.63615	1.73896e-08	329210	0.196195	0.65781	325.616
15:73099972_C_T	rs76536893	0	0.10863	0.0444579	2.44344	0.0145479	155097	0.188644	0.0260825	7.23256	4.73963e-13	329210	2.41869	0.119895	59.348
15:73592793_A_G	rs2680340	0	-0.155811	0.0442001	-3.52513	0.000423277	155097	-0.22045	0.0257617	-8.55727	1.15568e-17	329210	1.60135	0.205711	101.827
15:73667255_G_T	rs7172038	0	-0.423509	0.0589573	-7.18332	6.80387e-13	155097	-0.578795	0.0342793	-16.8847	5.83079e-64	329210	5.21852	0.0223475	11.062
15:74336633_C_T	rs5742915	0	-0.122401	0.0440149	-2.7809	0.00542084	155097	-0.160819	0.0257096	-6.25519	3.9702e-10	329210	0.569737	0.450363	222.93
15:83641353_C_G	rs11259963	0	-0.172978	0.0446002	-3.87841	0.000105141	155097	-0.11261	0.025902	-4.34755	1.37667e-05	329210	1.3782	0.240408	119.002
15:92421883_A_G	rs12905016	0	0.112793	0.0464877	2.42631	0.0152533	155097	0.0739666	0.0271177	2.72762	0.00637937	329210	0.522125	0.469937	232.619
15:93530260_C_G	rs11074123	0	0.189823	0.0503471	3.77029	0.000163056	155097	0.108607	0.0296742	3.65999	0.000252229	329210	1.94289	0.163356	80.861
15:95312071_C_T	rs12906962	0	0.226344	0.0469267	4.82336	1.4116e-06	155097	0.322699	0.0274945	11.7369	8.24993e-32	329210	3.14352	0.0762293	37.7335
15:99714970_T_TA	rs35205370	0	0.1295	0.049734	2.60385	0.00921818	155097	0.157977	0.0290157	5.44455	5.19369e-08	329210	0.243957	0.621363	307.575
16:10757192_A_G	rs1548956	0	0.225267	0.0450639	4.99885	5.76745e-07	155097	0.145186	0.026387	5.50219	3.75108e-08	329210	2.35667	0.124748	61.7504
16:15133783_C_CT	rs34345533	0	0.128214	0.0489028	2.62181	0.00874653	155097	0.165014	0.0286231	5.76507	8.16263e-09	329210	0.423307	0.515291	255.069
16:15912544_C_T	rs3915425	0	0.398634	0.046992	8.48302	2.19424e-17	155097	0.352728	0.0273432	12.9001	4.49742e-38	329210	0.715415	0.397652	196.838
16:16109242_A_G	rs246212	0	-0.242827	0.0497553	-4.88043	1.05855e-06	155097	-0.172031	0.0289859	-5.935	2.93844e-09	329210	1.51616	0.218201	108.009
16:1691106_C_T	rs2072986	0	-0.158437	0.0627631	-2.52436	0.0115909	155097	-0.207306	0.0368474	-5.62606	1.84367e-08	329210	0.451718	0.50152	248.252
16:17426113_G_T	rs4780694	0	-0.114639	0.04466	-2.56693	0.0102602	155097	-0.107807	0.0260997	-4.13057	3.61862e-05	329210	0.0175041	0.894745	442.899
16:20028998_C_T	rs2521478	0	-0.182073	0.0491609	-3.70362	0.000212545	155097	-0.232472	0.028864	-8.05406	8.00937e-16	329210	0.782339	0.376427	186.331
16:2195432_A_C	rs445835	0	-0.0990669	0.0566257	-1.7495	0.080204	155097	-0.146336	0.0330424	-4.42873	9.47875e-06	329210	0.52156	0.470177	232.738
16:22098662_C_T	rs72784941	0	0.328419	0.0878994	3.7363	0.000186747	155097	0.168872	0.0515352	3.27682	0.00104983	329210	2.46178	0.116647	57.7402
16:30692208_C_T	rs8048448	0	0.109479	0.0494439	2.21421	0.0268142	155097	0.17434	0.0290122	6.00921	1.86427e-09	329210	1.28258	0.257419	127.422
16:4260791_C_T	rs7197155	0	-0.216153	0.0436189	-4.9555	7.21462e-07	155097	-0.145347	0.0254234	-5.71705	1.08388e-08	329210	1.97153	0.160285	79.3411
16:51188710_A_G	rs71386547	0	0.179185	0.0543953	3.29413	0.000987255	155097	0.182755	0.0317331	5.75914	8.4545e-09	329210	0.00322196	0.954735	472.594
16:53496598_A_G	rs7204496	0	-0.263604	0.0433795	-6.07669	1.2269e-09	155097	-0.183454	0.0254016	-7.22215	5.11729e-13	329210	2.5569	0.109814	54.3578
16:56352854_A_C	rs2398144	0	0.120679	0.0448537	2.6905	0.00713456	155097	0.105814	0.0260827	4.05686	4.97375e-05	329210	0.0824144	0.774052	383.156
16:58558707_C_T	rs37053	0	-0.113479	0.0501519	-2.2627	0.023654	155097	-0.140655	0.0292265	-4.81259	1.48985e-06	329210	0.219358	0.63953	316.567
16:64610269_A_G	rs72786820	0	-0.111116	0.0454688	-2.44379	0.014534	155097	-0.106504	0.0265222	-4.01564	5.92847e-05	329210	0.00769777	0.930086	460.392
16:64899481_A_C	rs10500503	0	-0.21383	0.043762	-4.8862	1.02801e-06	155097	-0.203192	0.0255917	-7.93973	2.02617e-15	329210	0.044117	0.833636	412.65
16:65284815_A_G	rs2055726	0	-0.339696	0.0436788	-7.77714	7.41845e-15	155097	-0.328493	0.025459	-12.9028	4.33965e-38	329210	0.0492483	0.824377	408.066
16:661142_C_T	rs7204088	0	-0.091118	0.0522992	-1.74224	0.0814658	155097	-0.190704	0.030592	-6.2338	4.55259e-10	329210	2.71294	0.0995373	49.271
16:66285448_A_G	rs79507312	0	-0.290148	0.122199	-2.37439	0.017578	155097	-0.303312	0.0704764	-4.30374	1.67941e-05	329210	0.00878313	0.925333	458.04
16:66937003_G_T	rs28623312	0	0.340412	0.0797423	4.2689	1.96438e-05	155097	0.392976	0.0474321	8.28502	1.18091e-16	329210	0.323008	0.569806	282.054
16:67543463_C_T	rs138226610	0	-0.572162	0.14349	-3.98747	6.67823e-05	155097	-0.4512	0.0837615	-5.38672	7.17546e-08	329210	0.532349	0.465621	230.482
16:6913083_C_G	rs7206016	0	0.0780316	0.0494299	1.57863	0.114421	155097	0.149694	0.0289278	5.17475	2.2822e-07	329210	1.5695	0.21028	104.088
16:69940355_A_G	rs11075746	0	0.123088	0.0442968	2.77872	0.00545735	155097	0.130473	0.0258978	5.038	4.70413e-07	329210	0.0207896	0.885354	438.25
16:72097279_C_T	rs28731397	0	-0.247856	0.0480765	-5.15545	2.53016e-07	155097	-0.088714	0.0279831	-3.17027	0.001523	329210	8.21358	0.00415779	2.05811
16:73043247_A_G	rs8060855	0	-0.278395	0.0750631	-3.70881	0.000208233	155097	-0.145485	0.0438664	-3.31654	0.000911404	329210	2.34191	0.125935	62.3377
16:7381106_C_G	rs17671597	0	-0.00062212	0.0443641	-0.0140231	0.988812	155097	-0.148909	0.0256103	-5.81441	6.08467e-09	329210	8.40865	0.0037344	1.84853
16:75200037_A_G	rs12923447	0	0.0565121	0.0435626	1.29726	0.194541	155097	0.0970418	0.0254813	3.80835	0.000139897	329210	0.648251	0.420739	208.266
17:15134006_C_T	rs1804193	0	0.598749	0.0831726	7.19888	6.07101e-13	155097	0.497597	0.0491945	10.1149	4.74457e-24	329210	1.09909	0.294466	145.761
17:15187558_G_T	rs79416189	0	-0.390382	0.103903	-3.75719	0.000171835	155097	-0.400085	0.060145	-6.652	2.89142e-11	329210	0.0065764	0.935366	463.006
17:15228904_A_C	rs80004349	0	-0.329757	0.119996	-2.74806	0.00599496	155097	-0.369172	0.0695269	-5.30977	1.09764e-07	329210	0.0809581	0.776003	384.122
17:15341736_C_CAG	rs77537673	0	-0.115036	0.071057	-1.61893	0.105463	155097	-0.258405	0.0417686	-6.18659	6.1481e-10	329210	3.04058	0.0812069	40.1974
17:17133121_A_G	rs1613416	0	0.19334	0.0438026	4.41389	1.01531e-05	155097	0.188099	0.0254969	7.37735	1.6147e-13	329210	0.0107101	0.917574	454.199
17:17707105_C_T	rs3818717	0	-0.137165	0.04474	-3.06582	0.00217072	155097	-0.231557	0.0261068	-8.86962	7.33934e-19	329210	3.32992	0.0680301	33.6749
17:36860927_G_T	rs3760148	0	0.170534	0.0559606	3.0474	0.00230834	155097	0.196033	0.0325971	6.01382	1.81203e-09	329210	0.155542	0.693294	343.181
17:37830447_A_T	rs2934956	0	-0.170175	0.0466977	-3.64419	0.000268231	155097	-0.110935	0.027298	-4.06386	4.82681e-05	329210	1.20274	0.272774	135.023
17:45054564_A_G	rs12600452	0	-0.188182	0.0538686	-3.49336	0.000476981	155097	-0.193967	0.0314513	-6.16721	6.95035e-10	329210	0.00862806	0.925993	458.367
17:4856376_A_G	rs238238	0	0.111886	0.0472002	2.37045	0.0177665	155097	0.185449	0.0276471	6.70773	1.97675e-11	329210	1.81023	0.17848	88.3477
17:64288637_A_G	rs12948922	0	0.253897	0.074058	3.42836	0.000607244	155097	0.160046	0.0435741	3.67297	0.000239748	329210	1.20021	0.27328	135.274
17:71594243_T_TC	rs149576828	0	-0.147419	0.0564327	-2.6123	0.00899354	155097	-0.209595	0.0329203	-6.36676	1.93061e-10	329210	0.90919	0.34033	168.463
17:71656034_C_T	rs4789265	0	-0.217883	0.0860765	-2.53127	0.011365	155097	-0.305245	0.0504642	-6.04875	1.45973e-09	329210	0.770324	0.380117	188.158
17:7372637_C_T	rs12942267	0	-0.206659	0.0453342	-4.55858	5.1501e-06	155097	-0.109608	0.0263355	-4.162	3.15475e-05	329210	3.44176	0.0635681	31.4662
17:74684080_A_G	rs2286589	0	0.116175	0.043955	2.64304	0.00821663	155097	0.237232	0.0255654	9.27941	1.70419e-20	329210	5.68968	0.017065	8.44717
17:79372489_C_T	rs11657730	0	-0.0885467	0.0459648	-1.9264	0.0540541	155097	-0.1438	0.026766	-5.37248	7.76609e-08	329210	1.0838	0.297849	147.435
17:949783_A_G	rs751915	0	-0.117069	0.0455576	-2.5697	0.0101786	155097	-0.131708	0.0265837	-4.95444	7.25378e-07	329210	0.0771589	0.781185	386.687
18:12556646_A_G	rs12964660	0	-0.154326	0.0437526	-3.52724	0.000419911	155097	-0.127791	0.0254461	-5.02201	5.11337e-07	329210	0.276025	0.599319	296.663
18:13562149_C_T	rs1284436	0	-0.0761128	0.0443417	-1.71651	0.0860693	155097	-0.128021	0.0257712	-4.96763	6.77776e-07	329210	1.02766	0.310709	153.801
18:20072331_C_T	rs55906209	0	0.43091	0.0974076	4.42378	9.6987e-06	155097	0.470327	0.0571921	8.22363	1.97436e-16	329210	0.122176	0.726686	359.71
18:25690011_C_T	rs1231268	0	0.287473	0.0569871	5.04452	4.54659e-07	155097	0.19674	0.0332887	5.91011	3.41875e-09	329210	1.88814	0.169412	83.8588
18:25765493_G_T	rs12455124	0	-0.219768	0.052072	-4.22045	2.43812e-05	155097	-0.276261	0.0303752	-9.09494	9.4635e-20	329210	0.881522	0.347785	172.154
18:26266935_C_G	rs983987	0	-0.281375	0.0440123	-6.39311	1.62547e-10	155097	-0.172222	0.0255012	-6.75349	1.44334e-11	329210	4.62933	0.0314298	15.5577
18:30004014_A_G	rs60451418	0	-0.128333	0.0610101	-2.10347	0.0354247	155097	-0.236134	0.0356351	-6.62643	3.43907e-11	329210	2.34007	0.126084	62.4117
18:31399844_C_T	rs34146745	0	-0.0929285	0.04468	-2.07987	0.0375376	155097	-0.123915	0.0259901	-4.76778	1.86268e-06	329210	0.361171	0.547856	271.189
18:3252130_C_T	rs16944555	0	-0.33856	0.0636676	-5.31761	1.05139e-07	155097	-0.169909	0.0375646	-4.52311	6.09381e-06	329210	5.21749	0.0223608	11.0686
18:33925463_A_G	rs1606593	0	-0.111231	0.0575034	-1.93434	0.0530713	155097	-0.118289	0.0333118	-3.55098	0.000383805	329210	0.0113586	0.915125	452.987
18:34204629_C_G	rs16968050	0	0.295189	0.0608512	4.85099	1.22845e-06	155097	0.336615	0.0360089	9.34811	8.92283e-21	329210	0.344639	0.557164	275.796
18:34261473_A_G	rs151313792	0	-1.49373	0.442616	-3.37478	0.000738755	155097	-1.51596	0.246002	-6.16241	7.16473e-10	329210	0.00195119	0.964767	477.56
18:34289285_G_T	rs61735998	0	-0.910666	0.140374	-6.48742	8.73158e-11	155097	-0.860878	0.0841324	-10.2324	1.41933e-24	329210	0.0927695	0.760685	376.539
18:46324394_C_T	rs12956065	0	0.189017	0.0712075	2.65445	0.00794374	155097	0.186965	0.0417388	4.4794	7.48521e-06	329210	0.00062196	0.980104	485.151
18:52982458_C_T	rs893946	0	0.104534	0.0456563	2.28959	0.0220449	155097	0.119017	0.0267483	4.4495	8.60696e-06	329210	0.075366	0.783678	387.921
18:58348629_A_G	rs2877570	0	-0.0726206	0.043014	-1.6883	0.0913531	155097	-0.116191	0.0252931	-4.59376	4.35337e-06	329210	0.765651	0.381566	188.875
18:60881155_A_C	rs12957119	0	0.130303	0.0552566	2.35815	0.0183664	155097	0.126633	0.0323688	3.91219	9.14622e-05	329210	0.00329319	0.954237	472.348
18:64227107_A_G	rs540533	0	-0.112682	0.0603606	-1.86682	0.0619268	155097	-0.195938	0.0351064	-5.58126	2.38779e-08	329210	1.42535	0.232526	115.1
18:6747553_A_G	rs6506438	0	0.0892615	0.0437718	2.03925	0.0414255	155097	0.161635	0.0254905	6.341	2.28279e-10	329210	2.04832	0.152374	75.4254
18:77156174_A_G	rs139536097	0	0.277253	0.0727057	3.81336	0.00013709	155097	0.244638	0.0421066	5.80997	6.24854e-09	329210	0.151094	0.697492	345.259
19:11275842_A_G	rs3185010	0	-0.16733	0.0467883	-3.57632	0.000348465	155097	-0.181111	0.0272285	-6.65152	2.90091e-11	329210	0.0649835	0.798786	395.399
19:1208399_C_T	rs1978727	0	-0.17244	0.0466967	-3.69278	0.000221818	155097	-0.162493	0.0272944	-5.95335	2.62702e-09	329210	0.0338742	0.853975	422.717
19:17464411_A_G	rs2162889	0	0.146997	0.0483244	3.04187	0.00235111	155097	0.179305	0.0280578	6.39056	1.65278e-10	329210	0.335897	0.562207	278.293
19:30109533_A_G	rs12986417	0	0.155559	0.0459832	3.38295	0.000717119	155097	0.154182	0.0268489	5.74259	9.32394e-09	329210	0.00067022	0.979346	484.776
19:36560620_C_T	rs62109752	0	0.227797	0.0705928	3.22691	0.00125134	155097	0.293319	0.04131	7.10043	1.24366e-12	329210	0.64407	0.422241	209.009
19:39138608_C_T	rs2303040	0	-0.253755	0.0440001	-5.76713	8.06319e-09	155097	-0.204727	0.0255956	-7.99855	1.25896e-15	329210	0.9285	0.335253	165.95
19:40828500_G_GC	rs79222109	0	0.169974	0.0436462	3.89437	9.84556e-05	155097	0.216678	0.0255135	8.49268	2.01925e-17	329210	0.857331	0.354487	175.471
19:45412079_C_T	rs7412	0	0.483837	0.0801539	6.03635	1.57642e-09	155097	0.271399	0.0465463	5.83073	5.51868e-09	329210	5.27539	0.021629	10.7063
19:47556375_T_TG	rs61141867	0	-0.197123	0.0506599	-3.8911	9.97888e-05	155097	-0.11913	0.029504	-4.03776	5.39636e-05	329210	1.77339	0.182963	90.5666
19:49660889_A_G	rs3760662	0	-0.109168	0.0439996	-2.4811	0.0130976	155097	-0.161811	0.0256527	-6.30776	2.83112e-10	329210	1.07087	0.30075	148.871
19:5085485_A_G	rs11670830	0	-0.075692	0.0462141	-1.63785	0.101452	155097	-0.199191	0.0268522	-7.41806	1.18852e-13	329210	5.35609	0.02065	10.2218
2:101578458_A_G	rs6747755	0	-0.180637	0.0518478	-3.48399	0.000493994	155097	-0.260855	0.0303783	-8.58688	8.93594e-18	329210	1.7931	0.180549	89.3716
2:111870220_C_T	rs2289321	0	0.26288	0.0882914	2.97741	0.00290696	155097	0.397433	0.0522855	7.60122	2.93353e-14	329210	1.7246	0.189103	93.6058
2:111950594_A_C	rs11123407	0	-0.0928368	0.0439644	-2.11164	0.0347177	155097	-0.172522	0.0255217	-6.75982	1.38163e-11	329210	2.45984	0.116791	57.8113
2:11308842_A_G	rs62120155	0	-0.211021	0.0439937	-4.79661	1.6137e-06	155097	-0.103443	0.0256898	-4.02661	5.65864e-05	329210	4.48034	0.034287	16.9721
2:135252544_G_GCCTCCCAGGTTCTC	rs141311033	0	-0.164521	0.0449739	-3.65813	0.000254058	155097	-0.0997779	0.0261364	-3.81759	0.000134763	329210	1.55382	0.212572	105.223
2:148360603_C_T	rs13011875	0	-0.183373	0.0450662	-4.06898	4.72197e-05	155097	-0.165217	0.0262431	-6.29564	3.06129e-10	329210	0.121688	0.727211	359.969
2:159965140_C_T	rs6714340	0	-0.258275	0.0547862	-4.71425	2.42608e-06	155097	-0.262146	0.0320674	-8.17486	2.96204e-16	329210	0.00372772	0.951315	470.901
2:174014361_C_G	rs4972397	0	0.164406	0.0438661	3.74791	0.000178315	155097	0.092827	0.0256509	3.61886	0.000295899	329210	1.986	0.15876	78.5861
2:175529967_C_G	rs72914576	0	-0.23216	0.0567787	-4.08885	4.33519e-05	155097	-0.175466	0.0330524	-5.30873	1.10392e-07	329210	0.74815	0.387063	191.596
2:17681685_A_G	rs1715126	0	0.221712	0.0487867	4.54451	5.50629e-06	155097	0.193501	0.0283656	6.82168	8.99846e-12	329210	0.251118	0.616289	305.063
2:177109731_A_C	rs973406	0	0.0582984	0.0493992	1.18015	0.237941	155097	0.128884	0.0286416	4.49987	6.7994e-06	329210	1.53377	0.215548	106.696
2:179412966_A_G	rs35445420	0	-0.433998	0.133024	-3.26257	0.00110408	155097	-0.408638	0.0780174	-5.23778	1.62522e-07	329210	0.0271117	0.869214	430.261
2:179463446_T_TA	rs3214578	0	-0.556524	0.132246	-4.20826	2.57348e-05	155097	-0.409832	0.0764313	-5.36209	8.22627e-08	329210	0.923957	0.336438	166.537
2:179545660_A_T	rs557774221	0	1.98402	0.373389	5.31355	1.07507e-07	155097	0.909285	0.221662	4.10213	4.0937e-05	329210	6.14826	0.0131542	6.51131
2:179565068_A_G	rs3850166	0	-0.367444	0.113149	-3.24742	0.00116457	155097	-0.502705	0.0653459	-7.69297	1.43754e-14	329210	1.0726	0.300359	148.678
2:179725237_G_T	rs151041685	0	1.08958	0.0787304	13.8394	1.47497e-43	155097	1.03152	0.0457403	22.5518	1.29075e-112	329210	0.407565	0.523208	258.988
2:179839888_A_G	rs10497529	0	1.06454	0.117347	9.07172	1.1715e-19	155097	1.01758	0.0694512	14.6518	1.31288e-48	329210	0.119035	0.730084	361.391
2:180049999_C_T	rs12693177	0	-0.229634	0.0473325	-4.85152	1.22518e-06	155097	-0.131543	0.0276169	-4.76315	1.90594e-06	329210	3.21501	0.0729656	36.118
2:18722424_C_T	rs4832605	0	-0.137837	0.0444991	-3.09753	0.00195138	155097	-0.113185	0.0259403	-4.36328	1.28127e-05	329210	0.229727	0.631726	312.705
2:188165166_A_G	rs17705966	0	0.444312	0.0551336	8.05882	7.70346e-16	155097	0.316711	0.0321382	9.85467	6.54282e-23	329210	3.99706	0.0455798	22.562
2:191446691_A_C	rs7569128	0	0.237275	0.0562176	4.22066	2.43591e-05	155097	0.151738	0.0327701	4.6304	3.64964e-06	329210	1.73473	0.187807	92.9647
2:196046543_A_G	rs59522947	0	0.188847	0.0601833	3.13786	0.00170186	155097	0.209182	0.035263	5.93204	2.99189e-09	329210	0.0855548	0.769906	381.104
2:201159988_A_T	rs295139	0	0.137558	0.0440971	3.11943	0.00181199	155097	0.182977	0.0257675	7.10108	1.23788e-12	329210	0.793439	0.373062	184.666
2:203156422_C_T	rs113075198	0	-0.147129	0.0477353	-3.08218	0.0020549	155097	-0.120071	0.0276594	-4.34106	1.41799e-05	329210	0.240423	0.623901	308.831
2:218699116_C_T	rs2571444	0	0.164321	0.0687027	2.39177	0.0167674	155097	0.181838	0.0401719	4.52651	5.99646e-06	329210	0.0485021	0.82569	408.717
2:219652424_C_CCCTCTTACCTG	rs141407211	0	-0.138083	0.0443314	-3.11479	0.00184078	155097	-0.0843008	0.0258535	-3.26071	0.00111132	329210	1.1002	0.294222	145.64
2:220299541_G_T	rs907683	0	-0.343063	0.0452787	-7.57669	3.54485e-14	155097	-0.319467	0.026331	-12.1327	7.0836e-34	329210	0.203288	0.65208	322.779
2:220424706_C_T	rs72957521	0	-0.0736764	0.0501445	-1.46928	0.141756	155097	-0.147103	0.0291511	-5.04624	4.50599e-07	329210	1.60828	0.204733	101.343
2:228179328_C_T	rs59257065	0	-0.235059	0.0462851	-5.0785	3.80431e-07	155097	-0.224179	0.0270362	-8.2918	1.11546e-16	329210	0.0411458	0.839257	415.432
2:232264914_G_T	rs13025087	0	-0.399794	0.0510329	-7.83405	4.72384e-15	155097	-0.329286	0.0296963	-11.0884	1.42743e-28	329210	1.42779	0.232126	114.902
2:233421879_C_T	rs1190443	0	-0.10475	0.0501186	-2.09005	0.0366137	155097	-0.155034	0.0295655	-5.24375	1.57345e-07	329210	0.749918	0.386502	191.319
2:25082926_C_T	rs11687089	0	-0.174303	0.0441377	-3.94907	7.84544e-05	155097	-0.140719	0.0257368	-5.46763	4.56096e-08	329210	0.433724	0.510167	252.533
2:26932796_C_T	rs1275923	0	0.30214	0.0446879	6.76112	1.36932e-11	155097	0.138565	0.0262621	5.27623	1.31871e-07	329210	9.99801	0.0015671	0.775714
2:27730940_C_T	rs1260326	0	-0.289871	0.0446653	-6.48984	8.5926e-11	155097	-0.317851	0.0262229	-12.1211	8.16472e-34	329210	0.294263	0.587502	290.813
2:28859979_A_G	rs10210444	0	-0.186882	0.0555405	-3.3648	0.000765999	155097	-0.175785	0.0323715	-5.43024	5.62783e-08	329210	0.0299513	0.862601	426.987
2:29383256_G_T	rs3100246	0	0.196072	0.0618892	3.16811	0.00153433	155097	0.18104	0.0360667	5.01959	5.17826e-07	329210	0.0442559	0.833378	412.522
2:37099339_C_T	rs2252032	0	0.167002	0.0437304	3.81889	0.000134056	155097	0.111615	0.0256069	4.35879	1.30786e-05	329210	1.20105	0.273111	135.19
2:46533552_G_T	rs11684885	0	0.0797165	0.044202	1.80346	0.0713163	155097	0.179179	0.0257654	6.95422	3.54514e-12	329210	3.79264	0.0514783	25.4818
2:48011091_C_G	rs3136237	0	0.146885	0.0482376	3.04502	0.00232664	155097	0.142519	0.0280438	5.08201	3.73461e-07	329210	0.00614043	0.937541	464.083
2:53993487_A_G	rs17045199	0	0.10953	0.0453689	2.41422	0.015769	155097	0.176721	0.0265753	6.64984	2.9341e-11	329210	1.63291	0.201301	99.644
2:60004832_C_T	rs1442878	0	-0.250502	0.0452762	-5.53275	3.15246e-08	155097	-0.208441	0.026463	-7.87668	3.362e-15	329210	0.644491	0.422089	208.934
2:64882414_C_T	rs12466865	0	0.0526097	0.0458823	1.14662	0.251538	155097	0.159386	0.0267949	5.94838	2.70805e-09	329210	4.05315	0.044089	21.8241
2:66349950_C_T	rs17031548	0	-0.1084	0.0555723	-1.95061	0.0511035	155097	-0.122631	0.0324328	-3.78109	0.000156142	329210	0.0490885	0.824657	408.205
2:66725062_C_T	rs62144050	0	0.272782	0.0481335	5.66719	1.45158e-08	155097	0.191492	0.0280878	6.81765	9.25449e-12	329210	2.13302	0.144157	71.3575
2:85860228_A_T	rs6547629	0	-0.215798	0.045451	-4.74792	2.05518e-06	155097	-0.0560049	0.0266209	-2.1038	0.0353962	329210	9.26175	0.00233989	1.15825
2:8756183_C_T	rs6730558	0	-0.111986	0.044942	-2.4918	0.0127099	155097	-0.154171	0.0261296	-5.90024	3.62975e-09	329210	0.660199	0.41649	206.162
2:96826016_A_G	rs1168967	0	0.184902	0.0449923	4.10964	3.96283e-05	155097	0.149001	0.0263012	5.66519	1.46862e-08	329210	0.47546	0.490486	242.791
20:10660063_G_T	rs6040079	0	0.0455765	0.0453819	1.00429	0.315239	155097	0.118407	0.026512	4.46619	7.96243e-06	329210	1.92534	0.165269	81.8082
20:25426173_C_T	rs8116139	0	-0.342409	0.0869398	-3.93846	8.20051e-05	155097	-0.376444	0.0503097	-7.48252	7.291e-14	329210	0.11553	0.733934	363.297
20:36696264_C_T	rs117747410	0	0.426813	0.132677	3.21694	0.00129567	155097	0.351964	0.078133	4.50467	6.64757e-06	329210	0.237403	0.626088	309.914
20:36709047_C_T	rs545092644	0	-1.13909	0.237455	-4.79707	1.61003e-06	155097	-1.03153	0.141994	-7.2646	3.74148e-13	329210	0.151918	0.696709	344.871
20:36843992_A_G	rs6069234	0	-0.612872	0.0434603	-14.1019	3.69757e-45	155097	-0.594003	0.0253797	-23.4046	3.83402e-121	329210	0.141226	0.707065	349.997
20:36880293_C_T	rs74553833	0	0.23969	0.132618	1.80737	0.0707042	155097	0.541888	0.0778718	6.95873	3.43357e-12	329210	3.86287	0.0493657	24.436
20:39942516_A_G	rs142391093	0	0.12559	0.0520691	2.41199	0.0158655	155097	0.19343	0.0304493	6.35254	2.11787e-10	329210	1.26646	0.260432	128.914
20:42939693_C_T	rs148377517	0	0.688165	0.184686	3.72613	0.000194438	155097	0.603898	0.105086	5.7467	9.10024e-09	329210	0.158412	0.690622	341.858
20:56016072_C_T	rs13039273	0	0.118409	0.043936	2.69502	0.00703836	155097	0.116151	0.0257852	4.50455	6.65136e-06	329210	0.00196839	0.964612	477.483
20:57466093_G_T	rs185799410	0	-0.730739	0.13596	-5.37465	7.67333e-08	155097	-0.507883	0.0823051	-6.17073	6.79745e-10	329210	1.96806	0.160654	79.5237
20:61164022_C_T	rs4072474	0	0.173809	0.0518917	3.34947	0.000809669	155097	0.188633	0.0301866	6.24891	4.13339e-10	329210	0.0612417	0.804544	398.249
21:18118505_C_T	rs2824020	0	-0.170551	0.0456042	-3.73981	0.00018416	155097	-0.0824528	0.0266702	-3.09157	0.00199099	329210	2.77984	0.0954578	47.2516
21:18791868_C_G	rs80267658	0	-0.347124	0.07787	-4.45774	8.28282e-06	155097	-0.286322	0.0452511	-6.3274	2.4933e-10	329210	0.457694	0.498704	246.858
21:18915218_A_G	rs2824341	0	0.23141	0.0556238	4.16026	3.17879e-05	155097	0.219178	0.0323643	6.77221	1.26826e-11	329210	0.0363863	0.84872	420.116
21:35363759_G_T	rs11088268	0	0.205582	0.0651578	3.15514	0.0016042	155097	0.293167	0.0381974	7.67504	1.65368e-14	329210	1.35065	0.245164	121.356
22:20083500_C_CAGG	rs139814453	0	0.208647	0.0564119	3.69864	0.000216762	155097	0.161154	0.0329201	4.89531	9.81533e-07	329210	0.530732	0.466299	230.818
22:26160161_C_G	rs133890	0	0.100882	0.0440717	2.28904	0.0220772	155097	0.104303	0.0255111	4.08852	4.34137e-05	329210	0.00452178	0.946387	468.462
22:27910759_A_G	rs11703864	0	0.187564	0.0611472	3.06742	0.00215916	155097	0.0977284	0.0355835	2.74645	0.00602433	329210	1.62192	0.202824	100.398
22:28181399_C_T	rs2283847	0	-0.19606	0.0449496	-4.36179	1.29004e-05	155097	-0.231841	0.0262585	-8.82919	1.05439e-18	329210	0.473746	0.491269	243.178
22:39150543_G_T	rs2072794	0	-0.27145	0.0476115	-5.70135	1.1886e-08	155097	-0.279904	0.0279562	-10.0122	1.34668e-23	329210	0.0235508	0.878033	434.627
3:122069823_A_G	rs80158681	0	0.311208	0.0492615	6.31746	2.6589e-10	155097	0.216533	0.0287721	7.52579	5.24042e-14	329210	2.76405	0.0964039	47.7199
3:132401421_A_G	rs6792074	0	0.221657	0.0496512	4.46427	8.03416e-06	155097	0.101379	0.0290034	3.49543	0.000473296	329210	4.38038	0.0363549	17.9957
3:141125186_A_G	rs1344674	0	0.230156	0.0439322	5.23891	1.61532e-07	155097	0.178422	0.0257224	6.93643	4.02121e-12	329210	1.03778	0.308338	152.627
3:142647160_A_G	rs2707977	0	-0.0776037	0.055246	-1.40469	0.160113	155097	-0.136457	0.0322685	-4.2288	2.34937e-05	329210	0.851492	0.356131	176.285
3:15496866_C_CA	rs79782405	0	-0.159837	0.0483659	-3.30475	0.0009506	155097	-0.153754	0.0281922	-5.45377	4.93138e-08	329210	0.0118287	0.913393	452.13
3:156611676_C_T	rs9871817	0	0.171614	0.0442966	3.87421	0.000106971	155097	0.146715	0.0258652	5.67228	1.40912e-08	329210	0.236421	0.626803	310.267
3:156827227_C_T	rs11928162	0	0.137721	0.0442043	3.11555	0.00183603	155097	0.122545	0.0257418	4.76055	1.93065e-06	329210	0.0884328	0.766179	379.259
3:168881036_A_T	rs9834275	0	0.198248	0.043907	4.51518	6.32618e-06	155097	0.139659	0.0257048	5.4332	5.53526e-08	329210	1.33034	0.248745	123.129
3:171800256_A_G	rs4894803	0	0.176531	0.0447603	3.94393	8.01571e-05	155097	0.299097	0.0260316	11.4898	1.48521e-30	329210	5.6188	0.0177688	8.79555
3:172115590_A_AT	rs63693860	0	-0.208081	0.0505414	-4.11705	3.83751e-05	155097	-0.193568	0.0294491	-6.57295	4.93274e-11	329210	0.0616543	0.8039	397.931
3:179173224_A_T	rs7634416	0	-0.274087	0.0552978	-4.95655	7.17553e-07	155097	-0.448831	0.0323507	-13.8739	9.11592e-44	329210	7.45589	0.00632293	3.12985
3:183996213_C_T	rs843372	0	0.248771	0.0521225	4.77281	1.81676e-06	155097	0.150693	0.0304619	4.94693	7.53924e-07	329210	2.65365	0.103312	51.1396
3:18426898_A_C	rs9758869	0	-0.189698	0.0442606	-4.28593	1.81973e-05	155097	-0.182342	0.0258777	-7.04632	1.83715e-12	329210	0.0206666	0.885691	438.417
3:185342847_C_T	rs4686666	0	0.180241	0.0455595	3.95618	7.61577e-05	155097	0.141783	0.0266569	5.31882	1.04443e-07	329210	0.532701	0.465473	230.409
3:187707104_A_C	rs12152545	0	-0.146361	0.0589544	-2.48261	0.0130424	155097	-0.111879	0.0343103	-3.2608	0.00111098	329210	0.256208	0.612737	303.305
3:23146682_C_T	rs6783710	0	-0.152945	0.0435258	-3.51389	0.000441598	155097	-0.105689	0.0254577	-4.15156	3.30212e-05	329210	0.879016	0.348471	172.493
3:24464955_A_G	rs59212267	0	-0.352068	0.0477816	-7.36827	1.7286e-13	155097	-0.206312	0.0279471	-7.38225	1.55634e-13	329210	6.95672	0.00835051	4.1335
3:38598669_A_G	rs41312393	0	-0.185106	0.0928076	-1.99451	0.0460959	155097	-0.337397	0.0536046	-6.29419	3.09016e-10	329210	2.02636	0.154591	76.5224
3:38621237_C_G	rs41312411	0	-0.399381	0.0615228	-6.49159	8.49373e-11	155097	-0.321221	0.0359949	-8.92408	4.49429e-19	329210	1.20415	0.272493	134.884
3:38665823_A_G	rs7638275	0	-0.863117	0.165678	-5.20961	1.89237e-07	155097	-0.505472	0.0950587	-5.31747	1.05219e-07	329210	3.51437	0.0608387	30.1152
3:38684835_C_G	rs7427574	0	-0.237991	0.0550527	-4.32296	1.53948e-05	155097	-0.277418	0.032009	-8.66688	4.44133e-18	329210	0.38416	0.535385	265.016
3:38778540_C_T	rs11711941	0	0.257485	0.0444263	5.79578	6.80052e-09	155097	0.220902	0.0259841	8.50142	1.87281e-17	329210	0.503793	0.477838	236.53
3:42791123_A_G	rs339682	0	0.00495292	0.0500978	0.0988649	0.921246	155097	-0.163	0.0294066	-5.54297	2.97383e-08	329210	8.391	0.00377084	1.86657
3:47875324_A_G	rs34249203	0	0.127779	0.0462718	2.7615	0.00575367	155097	0.172242	0.0269786	6.38441	1.72058e-10	329210	0.690761	0.405906	200.923
3:49582123_C_CA	rs145933528	0	-0.349902	0.0533887	-6.55386	5.60682e-11	155097	-0.248438	0.0310876	-7.99154	1.33267e-15	329210	2.70778	0.0998598	49.4306
3:50814442_C_T	rs2262811	0	0.702225	0.186938	3.75646	0.000172331	155097	0.396242	0.108891	3.63888	0.000273825	329210	2.00562	0.156717	77.5748
3:53086857_G_GA	rs147140565	0	-0.187437	0.0730262	-2.56671	0.0102669	155097	-0.342601	0.0424733	-8.06626	7.24848e-16	329210	3.38002	0.0659912	32.6656
3:53398568_A_G	rs79193219	0	-0.244236	0.0454849	-5.36961	7.89088e-08	155097	-0.194939	0.0264848	-7.36043	1.8332e-13	329210	0.880066	0.348184	172.351
3:53679833_C_G	rs76697148	0	-0.608691	0.168938	-3.60303	0.000314524	155097	-0.448922	0.0988009	-4.5437	5.52751e-06	329210	0.670016	0.413046	204.458
3:56382661_G_T	rs13080589	0	0.164397	0.0467123	3.51935	0.000432611	155097	0.116073	0.0272487	4.25975	2.04652e-05	329210	0.801473	0.370653	183.473
3:58268793_A_G	rs1554123	0	0.111683	0.0439632	2.54038	0.0110731	155097	0.110066	0.0256288	4.29463	1.74985e-05	329210	0.00101555	0.974578	482.416
3:66495477_C_T	rs12491321	0	-0.23028	0.0592739	-3.88501	0.000102328	155097	-0.186815	0.0346292	-5.39473	6.86274e-08	329210	0.402445	0.525829	260.285
3:69402923_G_T	rs6762186	0	0.281994	0.0473417	5.95656	2.57598e-09	155097	0.218357	0.0276801	7.88861	3.05573e-15	329210	1.36171	0.243242	120.405
3:69845508_A_T	rs6549251	0	0.150981	0.044616	3.38402	0.000714337	155097	0.104515	0.0261138	4.0023	6.27291e-05	329210	0.811072	0.367804	182.063
3:71339355_G_T	rs1733511	0	0.163646	0.0440004	3.71919	0.000199859	155097	0.0912191	0.0255181	3.57468	0.000350655	329210	2.0359	0.153623	76.0436
3:73261000_C_G	rs901340	0	0.102412	0.0435632	2.35088	0.0187292	155097	0.15421	0.0254369	6.06246	1.34052e-09	329210	1.05933	0.303368	150.167
3:85451194_A_C	rs62250661	0	0.146231	0.0441933	3.3089	0.000936635	155097	0.149692	0.0256032	5.84662	5.01673e-09	329210	0.00461429	0.945842	468.192
3:8603243_C_T	rs165177	0	0.208284	0.0508833	4.09337	4.25145e-05	155097	0.130777	0.0294874	4.43503	9.20606e-06	329210	1.74263	0.186806	92.4688
3:99981943_C_G	rs12631115	0	-0.209804	0.0496615	-4.22468	2.3928e-05	155097	-0.0969823	0.0294831	-3.28943	0.00100392	329210	3.83301	0.0502527	24.8751
4:1224811_A_G	rs4974574	0	-0.206474	0.0442794	-4.66298	3.1166e-06	155097	-0.122118	0.0259009	-4.71481	2.41941e-06	329210	2.71072	0.099676	49.3396
4:122687491_C_G	rs4833772	0	0.08437	0.0438917	1.92223	0.0545768	155097	0.110089	0.0254259	4.3298	1.49244e-05	329210	0.257608	0.611768	302.825
4:148974582_G_T	rs144870889	0	1.26918	0.407179	3.117	0.00182699	155097	1.20301	0.22327	5.38816	7.11832e-08	329210	0.0203926	0.886446	438.791
4:148974602_C_T	rs6845865	0	-0.308691	0.0590512	-5.22751	1.71808e-07	155097	-0.376685	0.0343962	-10.9514	6.54574e-28	329210	0.989701	0.319815	158.309
4:149024481_C_T	rs11725517	0	0.185042	0.0435863	4.24541	2.18194e-05	155097	0.173881	0.0253848	6.84981	7.39492e-12	329210	0.0490091	0.824797	408.274
4:149230732_G_GA	rs34026733	0	0.152082	0.0529625	2.87149	0.00408536	155097	0.273763	0.030816	8.88379	6.46175e-19	329210	3.95039	0.0468606	23.196
4:154385925_C_G	rs7687559	0	0.0973911	0.044736	2.17702	0.0294792	155097	0.167813	0.0260661	6.43799	1.21063e-10	329210	1.85549	0.173147	85.7076
4:159856739_C_T	rs2068625	0	0.0863827	0.0476635	1.81234	0.0699331	155097	0.197693	0.0279766	7.06637	1.59044e-12	329210	4.07139	0.0436153	21.5896
4:169687725_G_T	rs7696431	0	0.230148	0.0436696	5.2702	1.36272e-07	155097	0.185729	0.0254402	7.30059	2.865e-13	329210	0.773998	0.378983	187.597
4:174584663_C_G	rs17059668	0	-0.21233	0.0801993	-2.64753	0.00810828	155097	-0.263312	0.0462832	-5.68915	1.27676e-08	329210	0.30415	0.581293	287.74
4:18017730_C_T	rs6830062	0	0.084864	0.0582605	1.45663	0.145219	155097	0.153065	0.0344728	4.44017	8.98893e-06	329210	1.02167	0.312123	154.501
4:23797961_G_GAGAA	rs200996785	0	-0.629846	0.182323	-3.45456	0.000551192	155097	-0.591681	0.104072	-5.68528	1.30597e-08	329210	0.0332874	0.855231	423.339
4:23951018_C_G	rs12501032	0	0.318874	0.0476899	6.6864	2.28724e-11	155097	0.307928	0.0279615	11.0126	3.32322e-28	329210	0.0392033	0.843046	417.308
4:6299914_A_G	rs4234731	0	0.103165	0.0445509	2.31566	0.0205767	155097	0.158672	0.0260268	6.0965	1.08414e-09	329210	1.1624	0.280967	139.079
4:83251758_C_CA	rs560944059	0	0.169804	0.0587747	2.88906	0.00386399	155097	0.207981	0.0341689	6.08684	1.15159e-09	329210	0.315227	0.57449	284.373
4:83274799_A_G	rs3944	0	0.185646	0.0527786	3.51744	0.000435724	155097	0.206554	0.0306947	6.72929	1.70487e-11	329210	0.117542	0.731715	362.199
4:95591976_C_G	rs998071	0	0.0971015	0.0457939	2.1204	0.033972	155097	0.120512	0.0266855	4.516	6.30174e-06	329210	0.195443	0.658425	325.92
5:111096426_C_G	rs255899	0	-0.227002	0.0556403	-4.07982	4.50714e-05	155097	-0.194941	0.0325479	-5.98936	2.1067e-09	329210	0.247754	0.618661	306.237
5:121866990_C_T	rs4836027	0	0.0975187	0.0474518	2.05511	0.0398683	155097	0.115141	0.0276437	4.16517	3.11126e-05	329210	0.103719	0.747411	369.968
5:122692653_G_GT	rs34984032	0	0.152858	0.0436166	3.50459	0.000457314	155097	0.187161	0.0253756	7.37564	1.63563e-13	329210	0.463947	0.495785	245.414
5:128228602_A_G	rs9327498	0	-0.162135	0.0521491	-3.10907	0.00187676	155097	-0.195001	0.0302967	-6.43639	1.22348e-10	329210	0.297501	0.585453	289.799
5:136431043_C_T	rs10052528	0	-0.127969	0.0457387	-2.79782	0.00514483	155097	-0.126667	0.0265217	-4.77596	1.78853e-06	329210	0.00060974	0.9803	485.248
5:137351159_A_C	rs113331339	0	-0.317306	0.0577628	-5.49325	3.94607e-08	155097	-0.387861	0.0335905	-11.5467	7.66802e-31	329210	1.11842	0.29026	143.679
5:137397539_C_CT	rs558603927	0	-0.157087	0.0514689	-3.05207	0.00227267	155097	-0.169447	0.030035	-5.64166	1.68419e-08	329210	0.0432288	0.835295	413.471
5:142402669_C_T	rs12187598	0	0.187168	0.0482148	3.88195	0.00010362	155097	0.209552	0.0282229	7.42489	1.12874e-13	329210	0.160993	0.688244	340.681
5:142708734_C_T	rs33381	0	0.211926	0.0590186	3.59084	0.000329617	155097	0.275791	0.0345704	7.97767	1.49126e-15	329210	0.875246	0.349507	173.006
5:146255046_C_T	rs319216	0	-0.140896	0.0607058	-2.32097	0.0202887	155097	-0.168456	0.0360123	-4.67772	2.90084e-06	329210	0.15298	0.695704	344.373
5:147932822_C_G	rs1363545	0	-0.111347	0.0440737	-2.52639	0.0115242	155097	-0.130985	0.0257103	-5.09467	3.49341e-07	329210	0.148941	0.699549	346.277
5:154713583_A_G	rs62379806	0	0.030206	0.0618162	0.488643	0.625095	155097	0.162093	0.0366136	4.42713	9.54955e-06	329210	3.37603	0.0661511	32.7448
5:166389709_G_T	rs384227	0	0.0605596	0.0503682	1.20234	0.229233	155097	0.170988	0.0293536	5.82509	5.70819e-09	329210	3.60135	0.0577327	28.5777
5:170712474_C_T	rs74402020	0	0.124717	0.0627624	1.98712	0.0469087	155097	0.181088	0.0366414	4.94218	7.72554e-07	329210	0.603053	0.437416	216.521
5:172670745_G_T	rs6891790	0	-0.269504	0.0482473	-5.58588	2.32514e-08	155097	-0.30257	0.0282041	-10.7279	7.53271e-27	329210	0.350925	0.55359	274.027
5:173390382_C_T	rs6875935	0	-0.155037	0.0456381	-3.3971	0.000681039	155097	-0.127842	0.0265734	-4.8109	1.50255e-06	329210	0.264827	0.606823	300.378
5:175709405_A_G	rs13176953	0	0.114621	0.044472	2.57737	0.00995562	155097	0.143934	0.0259116	5.55482	2.77896e-08	329210	0.324937	0.568656	281.485
5:30896358_A_C	rs1921102	0	-0.221968	0.0441023	-5.03303	4.82791e-07	155097	-0.14163	0.0256297	-5.52601	3.27598e-08	329210	2.48921	0.11463	56.7416
5:45183148_A_G	rs36000907	0	0.403426	0.083525	4.83	1.36532e-06	155097	0.345124	0.0476308	7.24581	4.29866e-13	329210	0.368438	0.543857	269.209
5:45398031_C_T	rs143574442	0	0.804536	0.299973	2.68203	0.00731772	155097	0.850023	0.177353	4.79283	1.64444e-06	329210	0.017081	0.896017	443.529
5:51059833_A_C	rs7724721	0	0.175404	0.0591347	2.96617	0.00301531	155097	0.187025	0.0343448	5.44552	5.16541e-08	329210	0.0289987	0.864782	428.067
5:61532825_C_G	rs12108677	0	-0.160222	0.0447475	-3.58059	0.000342817	155097	-0.0503662	0.0260147	-1.93607	0.0528596	329210	4.52441	0.0334146	16.5402
5:75003678_C_T	rs2307111	0	0.188467	0.0447344	4.21301	2.51985e-05	155097	0.216603	0.026054	8.3136	9.28406e-17	329210	0.296576	0.586037	290.088
5:76623421_G_T	rs9686502	0	-0.124803	0.0437184	-2.85471	0.00430768	155097	-0.0984878	0.0254523	-3.86951	0.000109054	329210	0.271573	0.602278	298.128
5:79041057_A_G	rs12514461	0	0.351016	0.0691943	5.0729	3.918e-07	155097	0.252378	0.0402938	6.26344	3.76566e-10	329210	1.51689	0.218091	107.955
5:81134423_C_T	rs12518812	0	0.228452	0.0497511	4.5919	4.39235e-06	155097	0.15281	0.0289711	5.27458	1.33062e-07	329210	1.73181	0.18818	93.1493
5:89380784_C_T	rs141062076	0	0.533722	0.155018	3.44298	0.000575349	155097	0.575044	0.0900628	6.38491	1.71494e-10	329210	0.0534223	0.817212	404.52
5:90410692_A_G	rs10942625	0	0.157501	0.045033	3.49746	0.000469719	155097	0.12411	0.0264642	4.68973	2.73572e-06	329210	0.410311	0.521811	258.297
[truncated: 93 more rows]

## Sheet: SD5
	Supplementary Data 5: Genetic correlation between RHR and previously performed GWAS’s (Final meta-analyses, UK Biobank and IC-RHR). Genetic correlations with traits were assessed using LD score regression software and the LD hub platform. Genetic correlations were considered significant if they achieved a Bonferroni-corrected significance of P<0 .05/855=5.85 × 10-5 (see p sig)
[truncated: 857 more rows]

[truncated: 26 more sheets: SD6, SD7, SD8, SD9, SD10, SD11, SD12, SD13, SD14, SD15, SD16, SD17, SD18, SD19, SD20, SD21, SD22, SD23, SD24, SD25 …]
